# Supplementary material for: Inflammation produced by senescent osteocytes mediates age-related bone loss
Source: Front Immunol. 2023 Feb 6;14:1114006. doi: 10.3389/fimmu.2023.1114006 (PMC9940315; doi:10.3389/fimmu.2023.1114006)
Supplement: Supplementary file 2 [file Table_2.xlsx]

## Sheet: B-A(BP)
Category	Term	Count	%	PValue	Genes	List Total	Pop Hits	Pop Total	Fold Enrichment	Bonferroni	Benjamini	FDR
GOTERM_BP_DIRECT	GO:0007155~cell adhesion	45	7.24638	2.79388e-08	ITGB1, SRPX, APP, CD151, ITGAM, TGFB1I1, ITGB3, COL12A1, ITGA2B, ITGB2, TNC, DPT, ATP2A2, ICAM3, THY1, ICAM1, PNN, ACAN, BSG, STAB1, CTNNA1, FLOT2, NCAM1, ITGAV, HABP2, FGB, AOC3, SIGLEC16, ACTN2, ITGA1, OMD, NME2, RPSA, VCAN, MMRN1, COL5A1, COL6A2, COL6A1, COL6A3, CTNNB1, CD9, ITGA6, TGFBI, FOLR2, FERMT2	611	557	19256	2.54614	9.37024e-05	1.33867e-05	1.29955e-05
GOTERM_BP_DIRECT	GO:0006412~translation	38	6.11916	9.4769e-17	RPL5, RPL30, RPL3, RPL10, RRBP1, RPL8, RPL9, RPL7, RPS4X, RPS14, RPS17, RPS19, RPL18A, RPL36AL, RPL14, RACK1, RPS3, RPL35, RPL38, RPS2, RPL15, RPS11, RPL17, RPS10, RPS8, RPL23, RPS5, RPS6, RPL23A, RPSA, RPS3A, RPS26, EEF1A1, SARS1, RPL27A, RPL24, RPL28, RPS23	611	223	19256	5.37036	3.72369e-13	1.58928e-13	1.54284e-13
GOTERM_BP_DIRECT	GO:0043066~negative regulation of apoptotic process	36	5.7971	3.195e-05	ARF4, ARL6IP1, RPL10, TFRC, PRKDC, GSTP1, GLO1, HSPB1, PARK7, MPO, HSPD1, PRDX2, OPA1, CFL1, MYO18A, FLNA, TGM2, TXNDC5, RPS6, NME2, ADAM10, RPS3A, AZU1, SOD2, MMP9, ATAD3A, YWHAZ, ACTC1, PROC, DDAH2, CAT, CTNNB1, VDAC1, PTMA, TPT1, LTF	611	526	19256	2.15696	0.10162	0.00417228	0.00405038
GOTERM_BP_DIRECT	GO:0045087~innate immune response	35	5.63607	0.000758965	APP, IGHM, ITGAM, PRKDC, DDX1, CFI, C4BPA, C4BPB, SAMHD1, CORO1A, C2, C4B, LGALS3, TRIM28, PCBP2, IGLC2, CAMP, FGB, LYN, FGA, IGHV3-72, XRCC5, NONO, F12, HLA-B, CYBB, CYBA, CNPY3, HLA-A, PML, BST2, SERPING1, PTX3, S100A9, LTF	611	597	19256	1.84765	0.921647	0.0425936	0.041349
GOTERM_BP_DIRECT	GO:0002181~cytoplasmic translation	34	5.47504	1.05758e-26	RPL5, RPL30, RPL3, RPL10, RPL8, RPL9, RPL7, RPS4X, RPS14, RPS17, RPS19, RPL18A, RPL14, RACK1, RPS3, RPL35, RPL38, RPS2, RPL15, RPS11, RPL17, RPS10, RPS8, RPL23, RPS5, RPS6, RPL23A, RPSA, RPS3A, RPS26, RPL27A, RPL24, RPL28, RPS23	611	90	19256	11.9059	3.54711e-23	3.54711e-23	3.44346e-23
GOTERM_BP_DIRECT	GO:0006508~proteolysis	30	4.83092	4.91621e-05	FCN1, CPB2, ENPEP, TINAGL1, CFI, CTSZ, PARK7, C2, ACAN, NPEPPS, NCSTN, PITRM1, ANPEP, CTSK, CTSG, ELANE, HABP2, TGM2, F10, F12, ERAP1, PCOLCE, AZU1, MMP9, PROC, PRTN3, UQCRC2, LAP3, KLKB1, LTF	611	409	19256	2.31165	0.152016	0.00566215	0.00549671
GOTERM_BP_DIRECT	GO:0042493~response to drug	29	4.66989	2.22317e-07	CPB2, RPN2, FECH, ATP1A1, HSPD1, ICAM1, ALAD, LDHA, XPO1, LGALS1, OXCT1, DPYSL2, MYO6, HMOX1, LYN, XRCC5, APOA2, CYBB, APOA1, CYBA, EEF2, SOD2, ACTC1, APEX1, CAT, CTNNB1, UQCRC2, CALR, TOP1	611	293	19256	3.11929	0.000745374	8.28502e-05	8.04294e-05
GOTERM_BP_DIRECT	GO:0006886~intracellular protein transport	26	4.1868	5.06454e-05	RAB1A, ARF4, COPB2, COPA, SEC23A, ARF1, RAB5C, COPB1, USO1, CLTC, CLTB, CLTA, AP2A1, AP2A2, XPO1, MYO6, VPS35, RAB6B, SEC31A, TMED4, SEC13, STX7, ARCN1, EHD1, ERP29, COPG1	611	328	19256	2.49818	0.156224	0.00566215	0.00549671
GOTERM_BP_DIRECT	GO:0030036~actin cytoskeleton organization	26	4.1868	7.01649e-10	EPB41, CORO1A, ADD2, CDC42, SPTA1, CFL1, PACSIN2, FLNA, FLNB, PDLIM5, VASP, CAP1, ACTN2, ACTN1, RHOG, ARPC5, SPTB, DIAPH1, CAPZA1, CAPZA2, FSCN1, ELMO1, PFN1, UTRN, RAN, PAFAH1B1	611	182	19256	4.50222	2.35333e-06	4.70666e-07	4.56914e-07
GOTERM_BP_DIRECT	GO:0010951~negative regulation of endopeptidase activity	24	3.86473	2.13341e-10	CSTB, SERPINA3, APP, SERPINA1, AHSG, SERPINC1, SERPINF1, PROS1, SERPINA10, PEBP1, ITIH1, SERPINA4, KNG1, AGT, BST2, C3, C4B, CD109, SERPINH1, SPP2, SERPING1, COL6A3, A2M, GAPDH	611	146	19256	5.18064	7.15546e-07	1.78887e-07	1.7366e-07
GOTERM_BP_DIRECT	GO:0030335~positive regulation of cell migration	21	3.38164	0.000201878	LYN, ITGB1, SUN2, LRRC15, GRN, CD151, F10, ADAM10, SOD2, CORO1A, MMP9, MYLK, DIAPH1, PPP3CA, MYADM, PECAM1, RACK1, ITGAV, ITGA6, FERMT2, FERMT3	611	256	19256	2.58526	0.491947	0.0178184	0.0172978
GOTERM_BP_DIRECT	GO:0043123~positive regulation of I-kappaB kinase/NF-kappaB signaling	21	3.38164	3.22902e-06	ECM1, UBE2I, TFRC, PRKCB, DDX1, FKBP1A, BST2, LGALS1, VAPA, TFG, EEF1D, UBE2N, S100A13, FLNA, HMOX1, CTNNB1, S100A4, GAPDH, TGM2, TMED4, LTF	611	192	19256	3.44701	0.0107717	0.000676884	0.000657106
GOTERM_BP_DIRECT	GO:0050821~protein stabilization	21	3.38164	2.46222e-05	RPL5, GRN, CRTAP, RPL23, CTNND1, APOA2, APOA1, P3H1, ATP1B3, PARK7, PML, HSPD1, LAMP1, FLOT1, FLNA, FLOT2, CHP1, CALR, PFN1, PPIB, GAPDH	611	220	19256	3.0083	0.0792658	0.00344095	0.00334041
GOTERM_BP_DIRECT	GO:0007596~blood coagulation	20	3.22061	2.87483e-11	FGB, FGA, CPB2, SERPINA1, F10, SERPINC1, ITGB3, F12, PROS1, SERPINA10, SLC4A1, C4BPB, KNG1, PROC, MMRN1, SERPING1, CD59, F13B, KLKB1, LNPK	611	88	19256	7.16262	9.64219e-08	3.21406e-08	3.12015e-08
GOTERM_BP_DIRECT	GO:0007568~aging	19	3.05958	4.75119e-05	GSN, RPN2, TFRC, SERPINF1, ITGB2, EEF2, SOD2, MPO, EIF2S1, DCN, AGT, PPP3CA, COL4A2, APEX1, CAT, CANX, LONP1, CTNNA1, SERPING1	611	194	19256	3.08657	0.14731	0.00566215	0.00549671
GOTERM_BP_DIRECT	GO:0043065~positive regulation of apoptotic process	19	3.05958	0.0172909	ITGB1, APP, DIABLO, PRKDC, RPS6, ADAM10, MMP9, KNG1, HSPD1, LDHA, LGALS1, FAM162A, RACK1, HMOX1, CTNNB1, ITGA6, MNDA, DNM1L, TGM2	611	328	19256	1.8256	1	0.298937	0.290202
GOTERM_BP_DIRECT	GO:0098609~cell-cell adhesion	19	3.05958	3.60663e-05	ITGAM, COL14A1, ITGB2, ITGA1, ITGA2B, CTNND1, ICAM3, THY1, LPP, CNN3, ICAM1, LGALS1, PECAM1, CTNNA1, MYH9, CTNNB1, ITGAV, ITGA6, PDLIM5	611	190	19256	3.15155	0.113938	0.00448023	0.00434932
GOTERM_BP_DIRECT	GO:0001525~angiogenesis	18	2.89855	0.00289074	ECM1, CLIC4, ENPEP, ERAP1, ITGA2B, THY1, YWHAZ, COL4A2, CALD1, ANPEP, NCL, BSG, FLNA, MYH9, HMOX1, ITGAV, CSPG4, TGFBI	611	252	19256	2.25111	0.999939	0.0950156	0.0922394
GOTERM_BP_DIRECT	GO:0006457~protein folding	18	2.89855	2.17665e-05	ERO1A, FKBP10, HSPA8, HSPA4, P3H1, MESD, PDIA5, HSPD1, FKBP1A, STIP1, DNAJB11, CANX, ERP29, FKBP9, CALR, PPIB, PPIA, TXNDC5	611	166	19256	3.41735	0.0704044	0.00317412	0.00308138
GOTERM_BP_DIRECT	GO:0007015~actin filament organization	18	2.89855	1.78624e-06	ARF1, ACTN1, RHOG, CORO1A, MYO1D, CDC42, SPTA1, TF, MYO1B, ACTC1, MYO6, FSCN1, ELMO1, CTNNA1, ALDOA, DBN1, MYO1F, MYO1G	611	138	19256	4.11072	0.00597313	0.000407035	0.000395141
GOTERM_BP_DIRECT	GO:0016192~vesicle-mediated transport	18	2.89855	0.00126399	RAB1A, RTN3, HSPA8, ARF4, COPB2, COPA, SEC23A, ARF1, COPB1, GDI2, CLTC, CLTB, CLTA, AP2A1, AP2A2, VAMP8, PLIN3, COPG1	611	233	19256	2.43468	0.985623	0.0586273	0.0569142
GOTERM_BP_DIRECT	GO:0016477~cell migration	18	2.89855	0.00537078	ITGB1, RAB1A, CD63, ARF4, ENPEP, CD151, ITGB3, ITGB2, ARPC5, IQGAP1, CORO1A, CDC42, COL5A1, FSCN1, MYO18A, ELMO1, CTNNA1, ITGAV	611	268	19256	2.11672	1	0.145271	0.141026
GOTERM_BP_DIRECT	GO:0007229~integrin-mediated signaling pathway	17	2.73752	3.73803e-07	ITGB1, ITGAM, ITGB3, ITGB2, ITGA1, ITGA2B, NME2, ADAM10, APOA1, THY1, CDC42, CTNNA1, MYH9, ITGAV, ITGA6, FERMT2, FERMT3	611	110	19256	4.87058	0.00125295	0.000104478	0.000101425
GOTERM_BP_DIRECT	GO:0007420~brain development	17	2.73752	0.0125301	RTN3, ARF4, XRCC5, PRKDC, COX17, CTNND1, MACROH2A2, ACAT1, PPP3CA, COL4A1, OXCT1, DPYSL2, STMN1, CD9, PHGDH, ATP6V0D1, NES	611	270	19256	1.98431	1	0.243408	0.236296
GOTERM_BP_DIRECT	GO:0009410~response to xenobiotic stimulus	17	2.73752	0.00439582	LYN, CPB2, RPN2, XRCC5, APOA2, CYBB, CYBA, ATP1A1, SOD2, ALAD, OXCT1, APEX1, CAT, HMOX1, CTNNB1, CALR, TOP1	611	241	19256	2.22309	1	0.126013	0.122332
GOTERM_BP_DIRECT	GO:0001649~osteoblast differentiation	16	2.57649	9.92955e-06	CLTC, TNC, HNRNPU, HSD17B4, RRBP1, SND1, MRC2, SYNCRIP, VCAN, COL6A1, CAT, TMEM119, ALPL, IARS1, SNRNP200, RBMX	611	125	19256	4.03399	0.0327554	0.00175283	0.00170161
GOTERM_BP_DIRECT	GO:0006897~endocytosis	16	2.57649	0.00266276	RAB1A, APP, CD163, RAB5C, CFI, SURF4, AP2A1, CDC42, MRC2, EHD1, EEA1, DPYSL2, MYO6, ENPP1, DNM1L, RAB7A	611	208	19256	2.42427	0.999869	0.0911316	0.0884688
GOTERM_BP_DIRECT	GO:0045471~response to ethanol	16	2.57649	2.10713e-05	ACTR2, G6PD, SPARC, GSN, FECH, GSTP1, TNC, EEF2, ICAM1, EEF1B2, RPS4X, ALAD, ACTC1, OXCT1, CAT, RPL15	611	133	19256	3.79134	0.0682343	0.00317412	0.00308138
GOTERM_BP_DIRECT	GO:0000398~mRNA splicing, via spliceosome	15	2.41546	0.00517572	SF3A3, HSPA8, SF3B2, HNRNPA3, NONO, HNRNPU, HNRNPR, PNN, SYNCRIP, HNRNPH1, HNRNPA2B1, MAGOH, HNRNPA1, SNRNP200, RBMX	611	202	19256	2.34026	1	0.14229	0.138132
GOTERM_BP_DIRECT	GO:0006397~mRNA processing	15	2.41546	0.010613	SF3A3, HSPA8, SF3B2, NONO, DDX1, HNRNPR, HNRNPL, NUDT21, LGALS3, PTBP1, PABPN1, HNRNPA2B1, HNRNPA1, PRKACA, HNRNPA0	611	220	19256	2.14879	1	0.217048	0.210706
GOTERM_BP_DIRECT	GO:0006888~ER to Golgi vesicle-mediated transport	15	2.41546	6.58128e-05	RAB1A, ARF4, COPB2, COPA, SEC23A, COPB1, USO1, ANK1, ARCN1, VAPA, TFG, COPG1, ERGIC1, TMED4, SEC31A	611	130	19256	3.63641	0.198078	0.00667874	0.0064836
GOTERM_BP_DIRECT	GO:0007160~cell-matrix adhesion	15	2.41546	7.13164e-06	FGB, ITGB1, FGA, CD63, ITGAM, ITGB3, ITGB2, ITGA1, FGG, ITGA2B, CTNNB1, ITGAV, ITGA6, FERMT2, FERMT3	611	107	19256	4.41807	0.0236358	0.00140703	0.00136592
GOTERM_BP_DIRECT	GO:0051092~positive regulation of NF-kappaB transcription factor activity	15	2.41546	0.000582859	APP, TFRC, PRKCB, ITGB2, AGT, ICAM1, PSMA6, CAT, FLOT1, UBE2N, RPS3, FLOT2, PPIA, S100A9, LTF	611	160	19256	2.95458	0.858503	0.0396148	0.0384573
GOTERM_BP_DIRECT	GO:0072659~protein localization to plasma membrane	15	2.41546	0.000620255	SEC23A, ACTN2, ATP1B3, SLC4A1, ANK1, EHD1, RAP1A, SCP2, BSG, FLOT1, MYADM, FLNA, FLOT2, EZR, RAB8B	611	161	19256	2.93623	0.875192	0.0401303	0.0389578
GOTERM_BP_DIRECT	GO:0006979~response to oxidative stress	14	2.25443	0.000111952	ERO1A, APP, GPX3, NDUFB4, IDH1, PARK7, EPX, MPO, PRDX6, ALAD, PRDX2, PRDX1, HMOX1, APOE	611	120	19256	3.67681	0.313059	0.0107282	0.0104147
GOTERM_BP_DIRECT	GO:0010976~positive regulation of neuron projection development	14	2.25443	0.000214964	LYN, SCARB2, TMEM30A, SERPINF1, NME2, P3H1, AP2A1, AGT, EHD1, RAP1A, DPYSL3, ITGA6, APOE, S100A9	611	128	19256	3.44701	0.513767	0.0184869	0.0179467
GOTERM_BP_DIRECT	GO:0032496~response to lipopolysaccharide	14	2.25443	0.00141627	SPARC, ATP2A2, SOD2, MPO, ADH5, DCN, HSPD1, ALAD, PRDX2, ALPL, S100A9, ELANE, HNRNPA0, PCK2	611	156	19256	2.82832	0.991379	0.0608996	0.0591202
GOTERM_BP_DIRECT	GO:0046718~viral entry into host cell	14	2.25443	1.80442e-05	ITGB1, SCARB2, TFRC, ITGB3, RPSA, SLC3A2, SLC1A5, ICAM1, VAMP8, LAMP1, ANPEP, BSG, ITGAV, NCAM1	611	101	19256	4.36849	0.0587257	0.00302601	0.00293759
GOTERM_BP_DIRECT	GO:0001501~skeletal system development	13	2.0934	0.00130866	AHSG, HEXA, PRELP, MMP9, ACAN, VCAN, COL2A1, PRDX1, COL5A2, SPP2, ALPL, RPL38, FBN1	611	136	19256	3.01252	0.987626	0.0586273	0.0569142
GOTERM_BP_DIRECT	GO:0001666~response to hypoxia	13	2.0934	0.0133765	AHCY, TFRC, SLC2A1, CYBA, SOD2, PML, HSPD1, MECP2, ALAD, LDHA, CAT, LONP1, HMOX1	611	182	19256	2.25111	1	0.252107	0.244741
GOTERM_BP_DIRECT	GO:0001934~positive regulation of protein phosphorylation	13	2.0934	0.0346724	LYN, APP, TFRC, ITGB3, MMP9, C3, FLOT1, TMEM119, ERP29, PECAM1, RACK1, PPIA, CAMP	611	209	19256	1.9603	1	0.474658	0.460789
GOTERM_BP_DIRECT	GO:0006096~glycolytic process	13	2.0934	5.72966e-09	GPI, TPI1, ADPGK, PGAM1, ENO1, LDHA, PFKL, PKM, PGK1, ALDOC, ALDOA, GAPDH, PGM1	611	43	19256	9.52796	1.92171e-05	3.20288e-06	3.1093e-06
GOTERM_BP_DIRECT	GO:0008104~protein localization	13	2.0934	0.00239029	YWHAE, YWHAB, SEPTIN2, SEPTIN9, YWHAZ, SEPTIN11, SEPTIN7, CDC42, MECP2, YWHAQ, CTNNA1, YWHAG, PLEC	611	146	19256	2.80618	0.999673	0.0862046	0.0836858
GOTERM_BP_DIRECT	GO:0009060~aerobic respiration	13	2.0934	1.82037e-06	NDUFB9, NDUFA13, NDUFB8, UQCRB, NDUFB4, NDUFB3, SDHB, UQCRH, NDUFS5, CAT, UQCRC1, NDUFS1, UQCRC2	611	70	19256	5.85289	0.00608692	0.000407035	0.000395141
GOTERM_BP_DIRECT	GO:0016525~negative regulation of angiogenesis	13	2.0934	0.000667966	SPARC, SERPINF1, DCN, AGT, PML, MECP2, SARS1, COL4A2, ALOX5, STAB1, PGK1, CTNNB1, PF4	611	126	19256	3.2516	0.893659	0.0407338	0.0395436
GOTERM_BP_DIRECT	GO:0030198~extracellular matrix organization	13	2.0934	0.0064007	ERO1A, APP, COL14A1, FBLN1, MMP9, COL2A1, COL4A2, COL5A1, COL4A1, COL5A2, VWA1, PTX3, TGFBI	611	165	19256	2.48304	1	0.157852	0.15324
GOTERM_BP_DIRECT	GO:0030199~collagen fibril organization	13	2.0934	3.19596e-07	FKBP10, CRTAP, COL14A1, LUM, COL12A1, DPT, ACAN, COL2A1, COL5A1, P4HA1, COL5A2, SERPINH1, FMOD	611	60	19256	6.82837	0.00107135	0.000103606	0.000100579
GOTERM_BP_DIRECT	GO:0043161~proteasome-mediated ubiquitin-dependent protein catabolic process	13	2.0934	0.0357374	PSMD11, PSMD13, PSMA7, PML, PSMA5, PSMA6, PSMC6, PSMB2, PSMA2, PSMC1, PCBP2, PSMB1, CTNNB1	611	210	19256	1.95096	1	0.481379	0.467314
GOTERM_BP_DIRECT	GO:0045766~positive regulation of angiogenesis	13	2.0934	0.00610517	ITGB1, ECM1, GRN, PRKCB, ITGB3, ERAP1, ITGB2, CYBB, HSPB1, C3, STIM1, HMOX1, CAMP	611	164	19256	2.49818	1	0.155127	0.150594
GOTERM_BP_DIRECT	GO:0008360~regulation of cell shape	12	1.93237	0.0105116	SPTA1, DIAPH1, WDR1, EPB41, ITGB2, RHOG, MYH9, ALDOA, EZR, CORO1A, FERMT2, ICAM1	611	155	19256	2.43991	1	0.216294	0.209974
GOTERM_BP_DIRECT	GO:0043524~negative regulation of neuron apoptotic process	12	1.93237	0.0120197	MECP2, GPI, AARS1, GRN, DNAJC5, HMOX1, PARK7, APOE, SOD2, NES, CORO1A, HSPD1	611	158	19256	2.39359	1	0.235756	0.228867
GOTERM_BP_DIRECT	GO:0065003~macromolecular complex assembly	12	1.93237	0.00915303	FGB, FGA, EPRS1, EPB41, CAPZA1, FGG, CAPZA2, SLC2A1, DNM1L, PML, ADD2, TAPBP	611	152	19256	2.48807	1	0.19806	0.192273
GOTERM_BP_DIRECT	GO:0070527~platelet aggregation	12	1.93237	1.12337e-07	FGB, FGA, RAP2B, ITGB3, FGG, ITGA2B, HSPB1, MYH9, FLNA, PPIA, CLIC1, FERMT3	611	45	19256	8.40415	0.000376708	4.70973e-05	4.57212e-05
GOTERM_BP_DIRECT	GO:0005975~carbohydrate metabolic process	11	1.77134	0.0475313	GPI, LDHB, PYGB, LDHA, MDH1, ADPGK, GLO1, HEXA, LANCL1, SLC3A2, PGM1	611	172	19256	2.01553	1	0.569358	0.552722
GOTERM_BP_DIRECT	GO:0006909~phagocytosis	11	1.77134	6.77034e-05	CNN2, ITGB1, ITGB2, ELMO1, PECAM1, ANXA11, ICAM3, PRTN3, MESD, CORO1A, ELANE	611	70	19256	4.95244	0.203147	0.00667874	0.0064836
GOTERM_BP_DIRECT	GO:0006958~complement activation, classical pathway	11	1.77134	0.00609938	C4B, C3, IGHM, IGHV3-72, C9, CFI, SERPING1, C4BPA, IGLC2, C4BPB, C2	611	124	19256	2.79573	1	0.155127	0.150594
GOTERM_BP_DIRECT	GO:0007605~sensory perception of sound	11	1.77134	0.0302465	SCARB2, DIAPH1, NDUFB9, COL2A1, WDR1, TIMM9, HEXA, MYO6, RPL38, ALDH7A1, ICAM1	611	159	19256	2.18032	1	0.429694	0.417139
GOTERM_BP_DIRECT	GO:0033627~cell adhesion mediated by integrin	11	1.77134	3.39794e-07	ITGB1, ITGAM, MMRN1, ITGB3, ITGA1, ITGB2, ITGA2B, ITGAV, ITGA6, ICAM1, FBN1	611	40	19256	8.66678	0.00113902	0.000103606	0.000100579
GOTERM_BP_DIRECT	GO:0051260~protein homooligomerization	11	1.77134	0.00719015	ALAD, LETM1, EHD1, APP, FUS, SUB1, C9, KCTD12, RBMX, ELAVL1, TGM2	611	127	19256	2.72969	1	0.172256	0.167222
GOTERM_BP_DIRECT	GO:0061844~antimicrobial humoral immune response mediated by antimicrobial peptide	11	1.77134	0.00242338	LGALS3, APP, RPL30, RPS19, DEFA3, GAPDH, S100A9, KNG1, CAMP, LTF, PF4	611	109	19256	3.18047	0.999708	0.0864683	0.0839418
GOTERM_BP_DIRECT	GO:0071333~cellular response to glucose stimulus	11	1.77134	0.000349348	PPP3CA, CPB2, LGALS1, OPA1, SERPINF1, RACK1, NME2, CYBA, PRKACA, PCK2, ICAM1	611	85	19256	4.07848	0.690227	0.0278979	0.0270828
GOTERM_BP_DIRECT	GO:0071346~cellular response to interferon-gamma	11	1.77134	0.00117244	ACTR3, CDC42, ACTR2, SYNCRIP, GSN, EPRS1, KIF5B, FLNB, GAPDH, ICAM1, HLA-DPA1	611	99	19256	3.50173	0.980448	0.0567066	0.0550497
GOTERM_BP_DIRECT	GO:1902600~hydrogen ion transmembrane transport	11	1.77134	0.00887225	LETM1, ATP6V1A, CYB5A, UQCRC1, ATP6V1B2, ATP1A1, SLC25A5, ATP6V0D1, UQCRH, SLC25A13, COX6B1	611	131	19256	2.64634	1	0.193231	0.187585
GOTERM_BP_DIRECT	GO:0006898~receptor-mediated endocytosis	10	1.61031	0.000590561	SCARB2, CAP1, ITGAM, ITGB2, CLTC, STAB1, M6PR, AP2A1, APOE, AP2A2	611	75	19256	4.20207	0.862114	0.0396148	0.0384573
GOTERM_BP_DIRECT	GO:0014823~response to activity	10	1.61031	6.06922e-05	ALAD, COL4A2, PRKDC, OXCT1, ITGB3, CAT, UQCRC1, CYBA, SOD2, HSPD1	611	56	19256	5.62778	0.184185	0.00656651	0.00637464
GOTERM_BP_DIRECT	GO:0030855~epithelial cell differentiation	10	1.61031	0.00294622	LGALS3, TAGLN, TST, COL4A1, TGFB1I1, PGK1, ALDOC, TAGLN2, VDAC1, CNN3	611	94	19256	3.35272	0.99995	0.0950156	0.0922394
GOTERM_BP_DIRECT	GO:0031175~neuron projection development	10	1.61031	0.021644	LYN, EHD1, APP, VAPA, SEPTIN2, STMN1, TNC, PHGDH, APOE, RAB6B	611	129	19256	2.44307	1	0.352397	0.342101
GOTERM_BP_DIRECT	GO:0032760~positive regulation of tumor necrosis factor production	10	1.61031	0.00735419	APP, ORM1, PTPRC, CYBB, HSPB1, CYBA, AZU1, ORM2, HSPD1, PF4	611	108	19256	2.91811	1	0.174936	0.169824
GOTERM_BP_DIRECT	GO:0032869~cellular response to insulin stimulus	10	1.61031	0.00779796	PKM, EPRS1, PARP1, PRKDC, GSTP1, ENPP1, YWHAG, APRT, RAB8B, PCK2	611	109	19256	2.89133	1	0.179139	0.173905
GOTERM_BP_DIRECT	GO:0050829~defense response to Gram-negative bacterium	10	1.61031	0.00294622	IGHM, APP, RPL30, RPS19, DEFA3, CTSG, AZU1, LYZ, CAMP, LTF	611	94	19256	3.35272	0.99995	0.0950156	0.0922394
GOTERM_BP_DIRECT	GO:1900026~positive regulation of substrate adhesion-dependent cell spreading	10	1.61031	7.96507e-06	FGB, CDC42, FGA, ITGB3, FGG, MYADM, FLNA, APOA1, CALR, FERMT2	611	44	19256	7.16262	0.0263613	0.00148416	0.00144079
GOTERM_BP_DIRECT	GO:0001503~ossification	9	1.44928	0.00548588	ECM1, SPARC, AHSG, COL5A2, TMEM119, RPL38, MESD, MMP9, LTF	611	85	19256	3.33694	1	0.146029	0.141762
GOTERM_BP_DIRECT	GO:0006469~negative regulation of protein kinase activity	9	1.44928	0.00178098	PTPRC, GSTP1, HSPB1, CHP1, PARK7, THY1, PPIA, YWHAG, PLEC	611	71	19256	3.99493	0.997468	0.071112	0.0690342
GOTERM_BP_DIRECT	GO:0006606~protein import into nucleus	9	1.44928	0.0166019	NUP93, PPP3CA, SEC13, TPR, ELAVL1, AGT, PML, KPNB1, RAN	611	103	19256	2.75379	1	0.290015	0.281541
GOTERM_BP_DIRECT	GO:0006635~fatty acid beta-oxidation	9	1.44928	0.000119373	CPT2, SCP2, ACOX1, ECI1, HSD17B4, HSD17B10, ALDH1L2, DECR1, ACAT1	611	48	19256	5.90917	0.32995	0.010821	0.0105049
GOTERM_BP_DIRECT	GO:0006816~calcium ion transport	9	1.44928	0.00770802	LETM1, PPP3CA, STIM1, PRKCB, ATP2A3, SLC3A2, DNM1L, CORO1A, TPT1	611	90	19256	3.15155	1	0.178294	0.173085
GOTERM_BP_DIRECT	GO:0006874~cellular calcium ion homeostasis	9	1.44928	0.0236731	STOML2, STIM1, PRKCB, ATP2A3, ATP2A2, CALR, APOE, ELANE, TPT1	611	110	19256	2.57854	1	0.371694	0.360833
GOTERM_BP_DIRECT	GO:0006911~phagocytosis, engulfment	9	1.44928	0.0298668	CDC42, IGHM, IGHV3-72, ITGAM, GSN, ITGB2, ELMO1, MYH9, IGLC2	611	115	19256	2.46643	1	0.429694	0.417139
GOTERM_BP_DIRECT	GO:0007584~response to nutrient	9	1.44928	0.00275091	LDHA, AHCY, TFRC, OXCT1, SERPINC1, CYBB, APOA1, A2M, C2	611	76	19256	3.7321	0.999903	0.0922656	0.0895697
GOTERM_BP_DIRECT	GO:0009615~response to virus	9	1.44928	0.0248325	EEF1G, BST2, PSMA2, CFL1, STMN1, HSPB1, BANF1, ENO1, TPT1	611	111	19256	2.55531	1	0.371822	0.360957
GOTERM_BP_DIRECT	GO:0017148~negative regulation of translation	9	1.44928	0.00474923	SYNCRIP, ILF3, EPRS1, NCL, RPS3, RACK1, PRG3, CALR, GAPDH	611	83	19256	3.41735	1	0.132956	0.129071
GOTERM_BP_DIRECT	GO:0019731~antibacterial humoral response	9	1.44928	0.000517001	IGHM, APP, TF, DEFA3, CTSG, HLA-A, AZU1, CAMP, LTF	611	59	19256	4.80746	0.823506	0.0361254	0.0350699
GOTERM_BP_DIRECT	GO:0030168~platelet activation	9	1.44928	0.00089871	FGB, FGA, RAP2B, ITGB3, FGG, CD9, CTSG, PPIA, PF4	611	64	19256	4.43187	0.950985	0.047098	0.0457219
GOTERM_BP_DIRECT	GO:0031640~killing of cells of other organism	9	1.44928	0.00162444	LGALS3, RPL30, RPS19, DEFA3, LYZ, GAPDH, KNG1, LTF, PF4	611	70	19256	4.052	0.995716	0.0681044	0.0661145
GOTERM_BP_DIRECT	GO:0034599~cellular response to oxidative stress	9	1.44928	0.00770802	PRDX2, G6PD, PARP1, LONP1, NME2, ATP2A2, PARK7, PPIA, EIF2S1	611	90	19256	3.15155	1	0.178294	0.173085
GOTERM_BP_DIRECT	GO:0034613~cellular protein localization	9	1.44928	0.00089871	CDC42, CD63, SEPTIN2, CTNNA1, CTNNB1, SEPTIN9, SEPTIN11, SEPTIN7, PLEC	611	64	19256	4.43187	0.950985	0.047098	0.0457219
GOTERM_BP_DIRECT	GO:0042060~wound healing	9	1.44928	0.0166019	CNN2, FKBP10, PPP3CA, SPARC, GSN, ITGB3, TNC, DCN, PLEC	611	103	19256	2.75379	1	0.290015	0.281541
GOTERM_BP_DIRECT	GO:0042776~mitochondrial ATP synthesis coupled proton transport	9	1.44928	0.000996931	NDUFB9, NDUFA13, STOML2, NDUFB8, NDUFS5, NDUFB4, NDUFB3, NDUFS1, SDHB	611	65	19256	4.36369	0.964753	0.0496446	0.048194
GOTERM_BP_DIRECT	GO:0051402~neuron apoptotic process	9	1.44928	0.00232305	APP, AARS1, NCSTN, FAM162A, DIABLO, DNAJC5, GAPDH, NES, CORO1A	611	74	19256	3.83297	0.999591	0.0846903	0.0822158
GOTERM_BP_DIRECT	GO:0051592~response to calcium ion	9	1.44928	0.000725522	FGB, FGA, PPP3CA, SPARC, FGG, HNRNPD, ANXA11, SLC25A13, SEC31A	611	62	19256	4.57484	0.91234	0.0425936	0.041349
GOTERM_BP_DIRECT	GO:0098869~cellular oxidant detoxification	9	1.44928	0.00298669	GPX3, GSTP1, PARK7, APOE, TXN, HBA1, EPX, PRDX6, S100A9	611	77	19256	3.68364	0.999956	0.0954035	0.0926159
GOTERM_BP_DIRECT	GO:0001933~negative regulation of protein phosphorylation	8	1.28824	0.0133796	LYN, PRKDC, CD109, MYADM, CHP1, FBLN1, PARK7, PPIA	611	80	19256	3.15155	1	0.252107	0.244741
GOTERM_BP_DIRECT	GO:0006953~acute-phase response	8	1.28824	0.000318036	SERPINA3, CD163, ORM1, SERPINA1, TFRC, AHSG, A2M, ORM2	611	42	19256	6.00296	0.655914	0.0260169	0.0252567
GOTERM_BP_DIRECT	GO:0007005~mitochondrion organization	8	1.28824	0.0151773	STOML2, OPA1, PARP1, LONP1, PARK7, DNM1L, HSD17B10, ATAD3A	611	82	19256	3.07469	1	0.275161	0.267121
GOTERM_BP_DIRECT	GO:0009306~protein secretion	8	1.28824	0.00207074	RCN3, CANX, FGG, ERP29, SNCG, COPG1, RAB8B, PAFAH1B1	611	57	19256	4.42323	0.999044	0.0807588	0.0783991
GOTERM_BP_DIRECT	GO:0021762~substantia nigra development	8	1.28824	0.00073674	CDC42, YWHAE, GLUD1, LDHA, G6PD, YWHAQ, BASP1, COX6B1	611	48	19256	5.25259	0.915579	0.0425936	0.041349
GOTERM_BP_DIRECT	GO:0022900~electron transport chain	8	1.28824	0.00278845	CYB5A, NDUFB3, CYBB, PHGDH, CYBA, ME2, ADH5, PDIA5	611	60	19256	4.20207	0.999914	0.0925985	0.0898929
GOTERM_BP_DIRECT	GO:0030593~neutrophil chemotaxis	8	1.28824	0.0151773	LGALS3, ITGA1, ITGB2, BSG, PPIB, PPIA, S100A9, PF4	611	82	19256	3.07469	1	0.275161	0.267121
GOTERM_BP_DIRECT	GO:0034605~cellular response to heat	8	1.28824	0.00134594	LYN, YWHAE, TPR, ATP2A2, HMOX1, PRKACA, EIF2S1, HSPD1	611	53	19256	4.75706	0.989082	0.0586273	0.0569142
GOTERM_BP_DIRECT	GO:0042730~fibrinolysis	8	1.28824	1.11848e-06	FGB, FGA, CPB2, F12, PROS1, FGG, SERPING1, KLKB1	611	19	19256	13.2697	0.00374435	0.000288568	0.000280136
GOTERM_BP_DIRECT	GO:0042744~hydrogen peroxide catabolic process	8	1.28824	2.05009e-05	PRDX2, GPX3, PRDX1, CAT, HBA1, EPX, MPO, PRDX6	611	28	19256	9.00444	0.0664498	0.00317412	0.00308138
GOTERM_BP_DIRECT	GO:0045727~positive regulation of translation	8	1.28824	0.0161378	HNRNPL, RPS4X, RPL5, PRKDC, HNRNPD, EEF2, EIF3C, ELAVL1	611	83	19256	3.03764	1	0.284875	0.276551
GOTERM_BP_DIRECT	GO:0050714~positive regulation of protein secretion	8	1.28824	0.00120041	FGB, FGA, ARF1, FGG, MYO18A, EZR, DNM1L, PPIA	611	52	19256	4.84855	0.982201	0.0567066	0.0550497
GOTERM_BP_DIRECT	GO:0051017~actin filament bundle assembly	8	1.28824	0.000115995	MYO1B, CALD1, ACTN1, DPYSL3, FSCN1, PLS3, EZR, ADD2	611	36	19256	7.00346	0.322312	0.0108068	0.0104911
GOTERM_BP_DIRECT	GO:0051028~mRNA transport	8	1.28824	0.0228191	NUP93, SEC13, NUP205, HNRNPA3, XPO1, MAGOH, HNRNPA2B1, HNRNPA1	611	89	19256	2.83286	1	0.369735	0.358932
GOTERM_BP_DIRECT	GO:0051603~proteolysis involved in cellular protein catabolic process	8	1.28824	0.000836405	PSMA6, PSMB2, PSMA2, CTSK, CTSZ, PSMB1, LONP1, PSMA7	611	49	19256	5.1454	0.939582	0.0452468	0.0439247
GOTERM_BP_DIRECT	GO:1990830~cellular response to leukemia inhibitory factor	8	1.28824	0.0433266	TFRC, XRCC5, NCL, HNRNPU, SLC25A5, PML, ICAM1, BCAT2	611	102	19256	2.47181	1	0.544916	0.528994
GOTERM_BP_DIRECT	GO:0006006~glucose metabolic process	7	1.12721	0.0192378	G6PD, FABP5, ADPGK, AKR1A1, GAPDH, PGM1, FBN1	611	67	19256	3.29267	1	0.322618	0.313192
GOTERM_BP_DIRECT	GO:0006094~gluconeogenesis	7	1.12721	0.0022169	GPI, TPI1, PGK1, ALDOC, PGM1, PCK2, SLC25A13	611	43	19256	5.13044	0.999415	0.0846903	0.0822158
GOTERM_BP_DIRECT	GO:0006413~translational initiation	7	1.12721	0.00639982	RPS17, RPS5, RPS3, RPS3A, EIF3C, EIF2S1, EIF3B	611	53	19256	4.16243	1	0.157852	0.15324
GOTERM_BP_DIRECT	GO:0006749~glutathione metabolic process	7	1.12721	0.00351002	EEF1G, G6PD, GLO1, GSTP1, IDH1, SOD2, CLIC1	611	47	19256	4.69381	0.999992	0.106059	0.10296
GOTERM_BP_DIRECT	GO:0006879~cellular iron ion homeostasis	7	1.12721	0.00988617	ATP6V1A, HPX, TF, TFRC, HMOX1, ATP6V0D1, CP	611	58	19256	3.8036	1	0.207239	0.201184
GOTERM_BP_DIRECT	GO:0006890~retrograde vesicle-mediated transport, Golgi to ER	7	1.12721	0.00529377	ARF4, COPB2, COPA, RAB6B, ERGIC1, ARCN1, TAPBP	611	51	19256	4.32566	1	0.144352	0.140134
GOTERM_BP_DIRECT	GO:0006919~activation of cysteine-type endopeptidase activity involved in apoptotic process	7	1.12721	0.0456679	FAM162A, DIABLO, ATP2A3, RACK1, S100A9, PML, HSPD1	611	82	19256	2.69035	1	0.550972	0.534873
GOTERM_BP_DIRECT	GO:0007017~microtubule-based process	7	1.12721	0.00151217	TUBB2B, TUBA1B, TUBA1A, DCTN2, TUBB, TUBB4B, PAFAH1B1	611	40	19256	5.51522	0.993753	0.0642	0.0623242
GOTERM_BP_DIRECT	GO:0007159~leukocyte cell-cell adhesion	7	1.12721	0.000442342	ITGB1, PTPRC, ITGB2, PECAM1, EZR, ICAM1, FERMT3	611	32	19256	6.89403	0.773258	0.0315663	0.030644
GOTERM_BP_DIRECT	GO:0007163~establishment or maintenance of cell polarity	7	1.12721	0.00836058	ACTR3, CDC42, CAP1, ACTR2, FSCN1, RHOG, CTNNA1	611	56	19256	3.93944	1	0.190758	0.185184
GOTERM_BP_DIRECT	GO:0008203~cholesterol metabolic process	7	1.12721	0.0456679	APP, CAT, APOA2, ERLIN1, HDLBP, APOA1, APOE	611	82	19256	2.69035	1	0.550972	0.534873
GOTERM_BP_DIRECT	GO:0008217~regulation of blood pressure	7	1.12721	0.0412755	ENPEP, ANPEP, ERAP1, HMOX1, ATP1A1, SOD2, AGT	611	80	19256	2.75761	1	0.52638	0.511
GOTERM_BP_DIRECT	GO:0008344~adult locomotory behavior	7	1.12721	0.00479656	MECP2, CSTB, APP, SNCG, PARK7, ARCN1, PAFAH1B1	611	50	19256	4.41218	1	0.132956	0.129071
GOTERM_BP_DIRECT	GO:0010498~proteasomal protein catabolic process	7	1.12721	0.000622175	PSMA5, PSMA6, PSMB2, PSMA2, DDI2, PSMB1, PSMA7	611	34	19256	6.4885	0.875994	0.0401303	0.0389578
GOTERM_BP_DIRECT	GO:0010595~positive regulation of endothelial cell migration	7	1.12721	0.020554	GPI, GRN, SPARC, ITGB3, BSG, CALR, AGT	611	68	19256	3.24425	1	0.341277	0.331306
GOTERM_BP_DIRECT	GO:0031032~actomyosin structure organization	7	1.12721	0.000731031	CNN2, ACTC1, EPB41, EPB41L2, MYO18A, MYH9, CNN3	611	35	19256	6.30311	0.913945	0.0425936	0.041349
GOTERM_BP_DIRECT	GO:0032092~positive regulation of protein binding	7	1.12721	0.0352044	SPTA1, FKBP1A, APP, EPB41, FLOT1, RAN, ADD2	611	77	19256	2.86505	1	0.476111	0.4622
GOTERM_BP_DIRECT	GO:0032757~positive regulation of interleukin-8 production	7	1.12721	0.0167803	FCN1, RAB1A, APOA2, PARK7, PRG3, CAMP, ELANE	611	65	19256	3.39398	1	0.291612	0.283092
GOTERM_BP_DIRECT	GO:0032956~regulation of actin cytoskeleton organization	7	1.12721	0.0456679	BST2, ITGB3, FSCN1, RHOG, IQGAP1, IQGAP2, CORO1A	611	82	19256	2.69035	1	0.550972	0.534873
GOTERM_BP_DIRECT	GO:0032981~mitochondrial respiratory chain complex I assembly	7	1.12721	0.014548	NDUFB9, NDUFA13, NDUFB8, NDUFS5, NDUFB4, NDUFB3, NDUFS1	611	63	19256	3.50173	1	0.268099	0.260266
GOTERM_BP_DIRECT	GO:0042542~response to hydrogen peroxide	7	1.12721	0.00639982	LDHA, CAT, HMOX1, HBA1, EEF2, SOD2, HSPD1	611	53	19256	4.16243	1	0.157852	0.15324
GOTERM_BP_DIRECT	GO:0043627~response to estrogen	7	1.12721	0.0264263	LDHA, ARPC1B, APOA2, CTNNA1, HMOX1, APOA1, HSPD1	611	72	19256	3.06401	1	0.392184	0.380725
GOTERM_BP_DIRECT	GO:0045333~cellular respiration	7	1.12721	0.0017247	UQCRB, UQCRC1, NDUFS1, UQCRC2, UQCRH, SLC25A13, COX6B1	611	41	19256	5.3807	0.996941	0.0696945	0.0676581
GOTERM_BP_DIRECT	GO:0045429~positive regulation of nitric oxide biosynthetic process	7	1.12721	0.00433454	APP, DDAH2, ITGB2, PTX3, SOD2, AGT, ICAM1	611	49	19256	4.50222	1	0.125328	0.121666
GOTERM_BP_DIRECT	GO:0050766~positive regulation of phagocytosis	7	1.12721	0.00479656	AHSG, APOA2, APOA1, PTX3, CYBA, AZU1, CALR	611	50	19256	4.41218	1	0.132956	0.129071
GOTERM_BP_DIRECT	GO:0060348~bone development	7	1.12721	0.00766478	OGN, CHAD, BGN, PLS3, P3H1, PPIB, TGM2	611	55	19256	4.01107	1	0.178294	0.173085
GOTERM_BP_DIRECT	GO:0061025~membrane fusion	7	1.12721	0.00195914	OPA1, VAPA, GCA, USO1, DYSF, CHP1, DNM1L	611	42	19256	5.25259	0.998609	0.0773055	0.0750467
GOTERM_BP_DIRECT	GO:0061077~chaperone-mediated protein folding	7	1.12721	0.0017247	FKBP11, FKBP1A, CRTAP, DNAJC5, HSPB1, P3H1, PPIB	611	41	19256	5.3807	0.996941	0.0696945	0.0676581
GOTERM_BP_DIRECT	GO:0000381~regulation of alternative mRNA splicing, via spliceosome	6	0.966184	0.0490828	HNRNPL, PTBP1, MAGOH, HNRNPU, HNRNPA1, RBMX	611	63	19256	3.00148	1	0.58171	0.564713
GOTERM_BP_DIRECT	GO:0006120~mitochondrial electron transport, NADH to ubiquinone	6	0.966184	0.016089	NDUFB9, NDUFB8, NDUFS5, NDUFB4, NDUFB3, NDUFS1	611	47	19256	4.02326	1	0.284875	0.276551
GOTERM_BP_DIRECT	GO:0006418~tRNA aminoacylation for protein translation	6	0.966184	0.000984927	GARS1, AARS1, RARS1, EPRS1, IARS1, VARS1	611	25	19256	7.56373	0.963304	0.0496446	0.048194
GOTERM_BP_DIRECT	GO:0006509~membrane protein ectodomain proteolysis	6	0.966184	0.000657291	NCSTN, ERAP1, MYH9, ADAM10, PRTN3, RBMX	611	23	19256	8.22145	0.88978	0.0407338	0.0395436
GOTERM_BP_DIRECT	GO:0006605~protein targeting	6	0.966184	0.0101453	YWHAE, YWHAQ, YWHAB, YWHAZ, PML, YWHAG	611	42	19256	4.50222	1	0.210044	0.203907
GOTERM_BP_DIRECT	GO:0006906~vesicle fusion	6	0.966184	0.0101453	VAMP8, EEA1, STX7, DYSF, CHP1, CORO1A	611	42	19256	4.50222	1	0.210044	0.203907
GOTERM_BP_DIRECT	GO:0006913~nucleocytoplasmic transport	6	0.966184	0.0239885	NUP93, SEC13, NUP205, XPO1, TPR, RAN	611	52	19256	3.63641	1	0.371694	0.360833
GOTERM_BP_DIRECT	GO:0006956~complement activation	6	0.966184	0.000984927	C4B, C3, CFHR1, C9, CFP, C2	611	25	19256	7.56373	0.963304	0.0496446	0.048194
GOTERM_BP_DIRECT	GO:0006986~response to unfolded protein	6	0.966184	0.0297475	HSPA8, HSPA4, SERPINH1, HSPB1, STT3B, HSPD1	611	55	19256	3.43806	1	0.429694	0.417139
GOTERM_BP_DIRECT	GO:0007052~mitotic spindle organization	6	0.966184	0.0318443	MECP2, SUN2, DYNC1H1, DCTN2, STMN1, RAN	611	56	19256	3.37667	1	0.437728	0.424938
GOTERM_BP_DIRECT	GO:0007162~negative regulation of cell adhesion	6	0.966184	0.0239885	ARHGDIB, TNC, ADAM10, FBLN1, TGFBI, KNG1	611	52	19256	3.63641	1	0.371694	0.360833
GOTERM_BP_DIRECT	GO:0010499~proteasomal ubiquitin-independent protein catabolic process	6	0.966184	0.000657291	PSMA5, PSMA6, PSMB2, PSMA2, PSMB1, PSMA7	611	23	19256	8.22145	0.88978	0.0407338	0.0395436
GOTERM_BP_DIRECT	GO:0014070~response to organic cyclic compound	6	0.966184	0.0411401	LYN, G6PD, PSMB2, LUM, CTNNA1, ACAT1	611	60	19256	3.15155	1	0.52638	0.511
GOTERM_BP_DIRECT	GO:0016241~regulation of macroautophagy	6	0.966184	0.0297475	ATP6V1A, ATP6V1B2, VPS35, ATP6V0D1, PRKACA, GAPDH	611	55	19256	3.43806	1	0.429694	0.417139
GOTERM_BP_DIRECT	GO:0019882~antigen processing and presentation	6	0.966184	0.016089	HLA-B, HLA-DRA, HLA-A, HLA-DRB3, RAB8B, HLA-DPA1	611	47	19256	4.02326	1	0.284875	0.276551
GOTERM_BP_DIRECT	GO:0022617~extracellular matrix disassembly	6	0.966184	0.0147508	CTSK, FLOT1, ADAM10, CTSG, MMP9, ELANE	611	46	19256	4.11072	1	0.27035	0.262451
GOTERM_BP_DIRECT	GO:0031589~cell-substrate adhesion	6	0.966184	0.000418878	ITGB1, ITGB3, ITGAV, ITGA6, CORO1A, MYO1G	611	21	19256	9.00444	0.754685	0.0305417	0.0296493
GOTERM_BP_DIRECT	GO:0031623~receptor internalization	6	0.966184	0.0175056	ITGB1, TFRC, ITGB2, CLTC, CD9, EZR	611	48	19256	3.93944	1	0.301096	0.292298
GOTERM_BP_DIRECT	GO:0032930~positive regulation of superoxide anion generation	6	0.966184	0.000418878	APP, ITGAM, GSTP1, ITGB2, CYBA, AGT	611	21	19256	9.00444	0.754685	0.0305417	0.0296493
GOTERM_BP_DIRECT	GO:0035987~endodermal cell differentiation	6	0.966184	0.00269371	COL4A2, COL12A1, ITGB2, COL6A1, ITGAV, MMP9	611	31	19256	6.09978	0.999882	0.0912595	0.088593
GOTERM_BP_DIRECT	GO:0043525~positive regulation of neuron apoptotic process	6	0.966184	0.0490828	CDC42, APP, GRN, CTSZ, ITGA1, CTNNB1	611	63	19256	3.00148	1	0.58171	0.564713
GOTERM_BP_DIRECT	GO:0045454~cell redox homeostasis	6	0.966184	0.0111885	ERO1A, PRDX2, APEX1, PRDX1, TXN, PRDX6	611	43	19256	4.39752	1	0.220742	0.214292
GOTERM_BP_DIRECT	GO:0046686~response to cadmium ion	6	0.966184	0.00168468	ALAD, GPI, CYB5A, SPARC, CAT, SOD2	611	28	19256	6.75333	0.996501	0.0696945	0.0676581
GOTERM_BP_DIRECT	GO:0050900~leukocyte migration	6	0.966184	0.00231879	LYN, MYH9, ITGA6, MMP9, ADD2, ICAM1	611	30	19256	6.30311	0.999585	0.0846903	0.0822158
GOTERM_BP_DIRECT	GO:0051289~protein homotetramerization	6	0.966184	0.0386784	VASP, SSBP1, ALDOA, SAMHD1, SOD2, HSD17B10	611	59	19256	3.20497	1	0.50282	0.488128
GOTERM_BP_DIRECT	GO:0061028~establishment of endothelial barrier	6	0.966184	0.000418878	RAP1B, RAP1A, PECAM1, MYADM, EZR, ICAM1	611	21	19256	9.00444	0.754685	0.0305417	0.0296493
GOTERM_BP_DIRECT	GO:0072583~clathrin-dependent endocytosis	6	0.966184	0.00118799	CANX, CLTC, CLTB, CLTA, AP2A1, AP2A2	611	26	19256	7.27282	0.981442	0.0567066	0.0550497
GOTERM_BP_DIRECT	GO:1901216~positive regulation of neuron death	6	0.966184	0.0111885	APP, ITGAM, PARP1, ITGB2, APOE, EIF2S1	611	43	19256	4.39752	1	0.220742	0.214292
GOTERM_BP_DIRECT	GO:0000027~ribosomal large subunit assembly	5	0.805153	0.00639786	RPL5, RPL3, RPL10, RPL24, RPL23A	611	24	19256	6.56574	1	0.157852	0.15324
GOTERM_BP_DIRECT	GO:0001878~response to yeast	5	0.805153	0.000774659	APP, PTX3, MPO, CAMP, ELANE	611	14	19256	11.2556	0.925668	0.0425936	0.041349
GOTERM_BP_DIRECT	GO:0001895~retina homeostasis	5	0.805153	0.0400712	TF, PRDX1, HSPB1, LYZ, LTF	611	41	19256	3.84336	1	0.514939	0.499893
GOTERM_BP_DIRECT	GO:0001916~positive regulation of T cell mediated cytotoxicity	5	0.805153	0.0098059	PTPRC, STX7, HLA-B, HLA-DRA, HLA-A	611	27	19256	5.83621	1	0.206849	0.200805
GOTERM_BP_DIRECT	GO:0002504~antigen processing and presentation of peptide or polysaccharide antigen via MHC class II	5	0.805153	0.00322413	HLA-B, HLA-DRA, HLA-A, HLA-DRB3, HLA-DPA1	611	20	19256	7.87889	0.99998	0.0983066	0.0954342
GOTERM_BP_DIRECT	GO:0006090~pyruvate metabolic process	5	0.805153	0.000402933	LDHB, LDHA, VDAC1, ME2, PCK2	611	12	19256	13.1315	0.741203	0.0305417	0.0296493
GOTERM_BP_DIRECT	GO:0006119~oxidative phosphorylation	5	0.805153	0.00264483	UQCRB, UQCRC1, UQCRC2, UQCRH, COX6B1	611	19	19256	8.29357	0.999861	0.0911316	0.0884688
GOTERM_BP_DIRECT	GO:0006414~translational elongation	5	0.805153	0.00388419	EEF1G, EEF1A1, EEF1B2, EEF1D, EEF2	611	21	19256	7.5037	0.999998	0.114277	0.110938
GOTERM_BP_DIRECT	GO:0006611~protein export from nucleus	5	0.805153	0.0159202	XPO1, CHP1, CALR, PRKACA, RAN	611	31	19256	5.08315	1	0.284875	0.276551
GOTERM_BP_DIRECT	GO:0006891~intra-Golgi vesicle-mediated transport	5	0.805153	0.024002	COPB2, COPA, COPB1, COPG1, RAB6B	611	35	19256	4.50222	1	0.371694	0.360833
GOTERM_BP_DIRECT	GO:0007566~embryo implantation	5	0.805153	0.0465068	TRIM28, ITGB3, BSG, FBLN1, MMP9	611	43	19256	3.6646	1	0.559081	0.542746
GOTERM_BP_DIRECT	GO:0010288~response to lead ion	5	0.805153	0.00388419	APP, SPARC, FECH, CAT, CPOX	611	21	19256	7.5037	0.999998	0.114277	0.110938
GOTERM_BP_DIRECT	GO:0010332~response to gamma radiation	5	0.805153	0.0126276	PTPRC, PARP1, PRKDC, SOD2, PML	611	29	19256	5.43372	1	0.243408	0.236296
GOTERM_BP_DIRECT	GO:0010952~positive regulation of peptidase activity	5	0.805153	0.000774659	RCN3, APP, NDUFA13, FBLN1, PCOLCE	611	14	19256	11.2556	0.925668	0.0425936	0.041349
GOTERM_BP_DIRECT	GO:0030050~vesicle transport along actin filament	5	0.805153	0.00264483	MYO1D, MYO1B, MYO6, MYO1F, MYO1G	611	19	19256	8.29357	0.999861	0.0911316	0.0884688
GOTERM_BP_DIRECT	GO:0030833~regulation of actin filament polymerization	5	0.805153	0.0288226	ARPC1B, ARPC5, PFN1, CORO1A, DBN1	611	37	19256	4.25886	1	0.420309	0.408028
GOTERM_BP_DIRECT	GO:0031639~plasminogen activation	5	0.805153	0.000275509	FGB, FGA, FGG, PGK1, KLKB1	611	11	19256	14.3252	0.603145	0.0231014	0.0224264
GOTERM_BP_DIRECT	GO:0034113~heterotypic cell-cell adhesion	5	0.805153	0.0126276	ITGB1, PTPRC, ITGB3, ITGB2, ITGAV	611	29	19256	5.43372	1	0.243408	0.236296
GOTERM_BP_DIRECT	GO:0034116~positive regulation of heterotypic cell-cell adhesion	5	0.805153	0.0013392	FGB, FGA, FGG, FLOT1, THY1	611	16	19256	9.84861	0.988832	0.0586273	0.0569142
GOTERM_BP_DIRECT	GO:0034314~Arp2/3 complex-mediated actin nucleation	5	0.805153	0.00742889	ACTR3, ACTR2, ARPC1B, ARPC5, IQGAP2	611	25	19256	6.30311	1	0.175468	0.170341
GOTERM_BP_DIRECT	GO:0042098~T cell proliferation	5	0.805153	0.0432213	PRDX2, NCSTN, CD151, PTPRC, CORO1A	611	42	19256	3.75185	1	0.544916	0.528994
GOTERM_BP_DIRECT	GO:0045807~positive regulation of endocytosis	5	0.805153	0.00546635	PPP3CA, ARF1, CD151, FLOT1, APOE	611	23	19256	6.85121	1	0.146029	0.141762
GOTERM_BP_DIRECT	GO:0046034~ATP metabolic process	5	0.805153	0.024002	ATP6V1A, HSPA8, ATP6V1B2, ENPP1, NDUFS1	611	35	19256	4.50222	1	0.371694	0.360833
GOTERM_BP_DIRECT	GO:0048678~response to axon injury	5	0.805153	0.0263461	LYN, ARF4, LGALS1, DPYSL3, SOD2	611	36	19256	4.37716	1	0.392184	0.380725
GOTERM_BP_DIRECT	GO:0050807~regulation of synapse organization	5	0.805153	0.0085636	SPARC, TUBA1A, TUBB, APOE, SEPTIN11	611	26	19256	6.06068	1	0.192767	0.187135
GOTERM_BP_DIRECT	GO:0050832~defense response to fungus	5	0.805153	0.024002	DEFA3, CTSG, MPO, GAPDH, S100A9	611	35	19256	4.50222	1	0.371694	0.360833
GOTERM_BP_DIRECT	GO:0050870~positive regulation of T cell activation	5	0.805153	0.0197058	HLA-DRA, THY1, HLA-DRB3, HSPD1, HLA-DPA1	611	33	19256	4.77508	1	0.328822	0.319214
GOTERM_BP_DIRECT	GO:0051279~regulation of release of sequestered calcium ion into cytosol	5	0.805153	0.00264483	LYN, DIAPH1, ITGB3, CYBA, CORO1A	611	19	19256	8.29357	0.999861	0.0911316	0.0884688
GOTERM_BP_DIRECT	GO:0055072~iron ion homeostasis	5	0.805153	0.0432213	TF, HMOX1, SOD2, CP, LTF	611	42	19256	3.75185	1	0.544916	0.528994
GOTERM_BP_DIRECT	GO:0061003~positive regulation of dendritic spine morphogenesis	5	0.805153	0.00462999	ACTR2, OPA1, DNM1L, DBN1, PAFAH1B1	611	22	19256	7.16262	1	0.131602	0.127756
GOTERM_BP_DIRECT	GO:0061621~canonical glycolysis	5	0.805153	0.0013392	PFKL, PKM, TPI1, PGK1, ENO1	611	16	19256	9.84861	0.988832	0.0586273	0.0569142
GOTERM_BP_DIRECT	GO:0070584~mitochondrion morphogenesis	5	0.805153	0.00388419	OPA1, SLIRP, SSBP1, DNM1L, PLEC	611	21	19256	7.5037	0.999998	0.114277	0.110938
GOTERM_BP_DIRECT	GO:0071353~cellular response to interleukin-4	5	0.805153	0.0085636	ALAD, TUBA1B, RPL3, CORO1A, PML	611	26	19256	6.06068	1	0.192767	0.187135
GOTERM_BP_DIRECT	GO:0072378~blood coagulation, fibrin clot formation	5	0.805153	3.23433e-05	FGB, FGA, FGG, FBLN1, F13B	611	7	19256	22.5111	0.102804	0.00417228	0.00405038
GOTERM_BP_DIRECT	GO:1902042~negative regulation of extrinsic apoptotic signaling pathway via death domain receptors	5	0.805153	0.0111594	FGB, FGA, FGG, HMOX1, ICAM1	611	28	19256	5.62778	1	0.220742	0.214292
GOTERM_BP_DIRECT	GO:1905920~positive regulation of CoA-transferase activity	5	0.805153	6.30627e-05	APOA2, APOA1, DBI, APOE, AGT	611	8	19256	19.6972	0.190646	0.00660976	0.00641663
GOTERM_BP_DIRECT	GO:2000767~positive regulation of cytoplasmic translation	5	0.805153	0.0013392	SYNCRIP, PKM, HNRNPD, HNRNPU, EEF2	611	16	19256	9.84861	0.988832	0.0586273	0.0569142
GOTERM_BP_DIRECT	GO:2001237~negative regulation of extrinsic apoptotic signaling pathway	5	0.805153	0.0288226	LGALS3, GSTP1, ITGAV, ITGA6, PARK7	611	37	19256	4.25886	1	0.420309	0.408028
GOTERM_BP_DIRECT	GO:0000028~ribosomal small subunit assembly	4	0.644122	0.0108301	RPS14, RPS19, RPS5, RPSA	611	15	19256	8.40415	1	0.217511	0.211155
GOTERM_BP_DIRECT	GO:0002438~acute inflammatory response to antigenic stimulus	4	0.644122	0.00230353	SERPINC1, A2M, ELANE, ICAM1	611	9	19256	14.0069	0.999563	0.0846903	0.0822158
GOTERM_BP_DIRECT	GO:0002523~leukocyte migration involved in inflammatory response	4	0.644122	0.0108301	ALOX5, ITGB2, S100A9, ELANE	611	15	19256	8.40415	1	0.217511	0.211155
GOTERM_BP_DIRECT	GO:0006122~mitochondrial electron transport, ubiquinol to cytochrome c	4	0.644122	0.00887011	UQCRB, UQCRC1, UQCRC2, UQCRH	611	14	19256	9.00444	1	0.193231	0.187585
GOTERM_BP_DIRECT	GO:0006826~iron ion transport	4	0.644122	0.0241416	TF, TFRC, CP, LTF	611	20	19256	6.30311	1	0.371694	0.360833
GOTERM_BP_DIRECT	GO:0007035~vacuolar acidification	4	0.644122	0.0349815	ATP6V1A, CLIC4, ATP6V1B2, ATP6V0D1	611	23	19256	5.48096	1	0.475011	0.461132
GOTERM_BP_DIRECT	GO:0007097~nuclear migration	4	0.644122	0.0154445	CDC42, SUN2, DYNC1H1, PAFAH1B1	611	17	19256	7.41542	1	0.278499	0.270361
GOTERM_BP_DIRECT	GO:0008347~glial cell migration	4	0.644122	0.00321369	VCAN, CD9, CSPG4, AZU1	611	10	19256	12.6062	0.99998	0.0983066	0.0954342
GOTERM_BP_DIRECT	GO:0010873~positive regulation of cholesterol esterification	4	0.644122	0.00230353	APOA2, APOA1, APOE, AGT	611	9	19256	14.0069	0.999563	0.0846903	0.0822158
GOTERM_BP_DIRECT	GO:0019430~removal of superoxide radicals	4	0.644122	0.00713537	PRDX2, PRDX1, SOD2, MPO	611	13	19256	9.69709	1	0.172173	0.167142
GOTERM_BP_DIRECT	GO:0022904~respiratory electron transport chain	4	0.644122	0.0275178	ETFA, SOD2, SDHB, PLEC	611	21	19256	6.00296	1	0.404801	0.392974
GOTERM_BP_DIRECT	GO:0030042~actin filament depolymerization	4	0.644122	0.00713537	GSN, WDR1, CFL1, DSTN	611	13	19256	9.69709	1	0.172173	0.167142
GOTERM_BP_DIRECT	GO:0030048~actin filament-based movement	4	0.644122	0.0181051	MYO1B, ACTC1, MYO6, MYH9	611	18	19256	7.00346	1	0.30982	0.300767
GOTERM_BP_DIRECT	GO:0030195~negative regulation of blood coagulation	4	0.644122	0.00887011	PROC, PROS1, APOE, KNG1	611	14	19256	9.00444	1	0.193231	0.187585
GOTERM_BP_DIRECT	GO:0030500~regulation of bone mineralization	4	0.644122	0.0311317	ECM1, AHSG, OMD, ENPP1	611	22	19256	5.7301	1	0.429694	0.417139
GOTERM_BP_DIRECT	GO:0030705~cytoskeleton-dependent intracellular transport	4	0.644122	0.021004	TUBA1B, TUBA1A, KIF5B, TUBB	611	19	19256	6.63485	1	0.343645	0.333604
GOTERM_BP_DIRECT	GO:0032964~collagen biosynthetic process	4	0.644122	0.00321369	RCN3, COL5A1, SERPINH1, PCOLCE	611	10	19256	12.6062	0.99998	0.0983066	0.0954342
GOTERM_BP_DIRECT	GO:0033591~response to L-ascorbic acid	4	0.644122	0.00100651	SPARC, GSTP1, CAT, SOD2	611	7	19256	18.0089	0.965868	0.0496446	0.048194
GOTERM_BP_DIRECT	GO:0033690~positive regulation of osteoblast proliferation	4	0.644122	0.00713537	ITGB3, TMEM119, ITGAV, LTF	611	13	19256	9.69709	1	0.172173	0.167142
GOTERM_BP_DIRECT	GO:0034101~erythrocyte homeostasis	4	0.644122	0.00321369	GPI, RPS17, PRDX1, HMOX1	611	10	19256	12.6062	0.99998	0.0983066	0.0954342
GOTERM_BP_DIRECT	GO:0034374~low-density lipoprotein particle remodeling	4	0.644122	0.0130203	APOA2, APOE, MPO, AGT	611	16	19256	7.87889	1	0.248126	0.240876
GOTERM_BP_DIRECT	GO:0034380~high-density lipoprotein particle assembly	4	0.644122	0.0056197	APOA2, APOA1, APOE, PRKACA	611	12	19256	10.5052	1	0.148413	0.144077
GOTERM_BP_DIRECT	GO:0039694~viral RNA genome replication	4	0.644122	0.00230353	CDC42, EEA1, PCBP1, PCBP2	611	9	19256	14.0069	0.999563	0.0846903	0.0822158
GOTERM_BP_DIRECT	GO:0042026~protein refolding	4	0.644122	0.0433788	FKBP1A, HSPA8, HSPB1, HSPD1	611	25	19256	5.04249	1	0.544916	0.528994
GOTERM_BP_DIRECT	GO:0042157~lipoprotein metabolic process	4	0.644122	0.0311317	APP, APOA2, APOA1, APOE	611	22	19256	5.7301	1	0.429694	0.417139
GOTERM_BP_DIRECT	GO:0042554~superoxide anion generation	4	0.644122	0.0390648	CYBB, CYBA, PRG3, SOD2	611	24	19256	5.25259	1	0.503936	0.489212
GOTERM_BP_DIRECT	GO:0043171~peptide catabolic process	4	0.644122	0.0130203	NPEPPS, ENPEP, ANPEP, ERAP1	611	16	19256	7.87889	1	0.248126	0.240876
GOTERM_BP_DIRECT	GO:0043277~apoptotic cell clearance	4	0.644122	0.0241416	ITGB3, ITGAV, TGM2, TXNDC5	611	20	19256	6.30311	1	0.371694	0.360833
GOTERM_BP_DIRECT	GO:0046685~response to arsenic-containing substance	4	0.644122	0.0108301	ALAD, FECH, SERPINF1, CPOX	611	15	19256	8.40415	1	0.217511	0.211155
GOTERM_BP_DIRECT	GO:0048025~negative regulation of mRNA splicing, via spliceosome	4	0.644122	0.0390648	HNRNPL, PTBP1, HNRNPA2B1, RBMX	611	24	19256	5.25259	1	0.503936	0.489212
GOTERM_BP_DIRECT	GO:0048026~positive regulation of mRNA splicing, via spliceosome	4	0.644122	0.0479199	HSPA8, NCL, PRDX6, RBMX	611	26	19256	4.84855	1	0.57197	0.555257
GOTERM_BP_DIRECT	GO:0050665~hydrogen peroxide biosynthetic process	4	0.644122	0.00321369	ACOX1, CYBB, CYBA, SOD2	611	10	19256	12.6062	0.99998	0.0983066	0.0954342
GOTERM_BP_DIRECT	GO:0050765~negative regulation of phagocytosis	4	0.644122	0.021004	CNN2, DYSF, RACK1, PRTN3	611	19	19256	6.63485	1	0.343645	0.333604
GOTERM_BP_DIRECT	GO:0050778~positive regulation of immune response	4	0.644122	0.0241416	C9, CTSG, CFP, ELANE	611	20	19256	6.30311	1	0.371694	0.360833
GOTERM_BP_DIRECT	GO:0051016~barbed-end actin filament capping	4	0.644122	0.0349815	GSN, CAPZA1, CAPZA2, ADD2	611	23	19256	5.48096	1	0.475011	0.461132
GOTERM_BP_DIRECT	GO:0051259~protein oligomerization	4	0.644122	0.021004	STOML2, OPA1, CHP1, DNM1L	611	19	19256	6.63485	1	0.343645	0.333604
GOTERM_BP_DIRECT	GO:0051604~protein maturation	4	0.644122	0.0241416	GALNT2, DNAJB11, SERPINH1, HSPD1	611	20	19256	6.30311	1	0.371694	0.360833
GOTERM_BP_DIRECT	GO:0055119~relaxation of cardiac muscle	4	0.644122	0.00887011	CAMK2D, GSN, ATP2A2, ATP1A1	611	14	19256	9.00444	1	0.193231	0.187585
GOTERM_BP_DIRECT	GO:0061640~cytoskeleton-dependent cytokinesis	4	0.644122	0.0311317	SEPTIN2, SEPTIN9, SEPTIN11, SEPTIN7	611	22	19256	5.7301	1	0.429694	0.417139
GOTERM_BP_DIRECT	GO:0075522~IRES-dependent viral translational initiation	4	0.644122	0.00431551	PTBP1, SSB, PCBP2, EIF3B	611	11	19256	11.4602	0.999999	0.125328	0.121666
GOTERM_BP_DIRECT	GO:0090110~cargo loading into COPII-coated vesicle	4	0.644122	0.00887011	RAB1A, SEC23A, SEC13, SEC31A	611	14	19256	9.00444	1	0.193231	0.187585
GOTERM_BP_DIRECT	GO:1901214~regulation of neuron death	4	0.644122	0.0311317	CTSZ, CHP1, SNCG, APOE	611	22	19256	5.7301	1	0.429694	0.417139
GOTERM_BP_DIRECT	GO:1903779~regulation of cardiac conduction	4	0.644122	0.0275178	ATP2A3, ATP2A2, PRKACA, AGT	611	21	19256	6.00296	1	0.404801	0.392974
GOTERM_BP_DIRECT	GO:0002003~angiotensin maturation	3	0.483092	0.0380913	ENPEP, CTSZ, CTSG	611	10	19256	9.45466	1	0.497114	0.482589
GOTERM_BP_DIRECT	GO:0002693~positive regulation of cellular extravasation	3	0.483092	0.018928	PLVAP, THY1, ICAM1	611	7	19256	13.5067	1	0.319017	0.309696
GOTERM_BP_DIRECT	GO:0006550~isoleucine catabolic process	3	0.483092	0.00940136	HSD17B10, ACAT1, BCAT2	611	5	19256	18.9093	1	0.199571	0.19374
GOTERM_BP_DIRECT	GO:0006613~cotranslational protein targeting to membrane	3	0.483092	0.0455971	SEC61A1, ARL6IP1, SRP14	611	11	19256	8.59515	1	0.550972	0.534873
GOTERM_BP_DIRECT	GO:0006614~SRP-dependent cotranslational protein targeting to membrane	3	0.483092	0.0380913	SEC61A1, SRP14, SEC63	611	10	19256	9.45466	1	0.497114	0.482589
GOTERM_BP_DIRECT	GO:0010637~negative regulation of mitochondrial fusion	3	0.483092	0.0311158	VAT1, TFRC, DNM1L	611	9	19256	10.5052	1	0.429694	0.417139
GOTERM_BP_DIRECT	GO:0019674~NAD metabolic process	3	0.483092	0.0455971	LDHB, LDHA, MDH1	611	11	19256	8.59515	1	0.550972	0.534873
GOTERM_BP_DIRECT	GO:0019885~antigen processing and presentation of endogenous peptide antigen via MHC class I	3	0.483092	0.0455971	ERAP1, HLA-A, TAPBP	611	11	19256	8.59515	1	0.550972	0.534873
GOTERM_BP_DIRECT	GO:0022417~protein maturation by protein folding	3	0.483092	0.0247131	ERO1A, FKBP1A, CALR	611	8	19256	11.8183	1	0.371694	0.360833
GOTERM_BP_DIRECT	GO:0030043~actin filament fragmentation	3	0.483092	0.00576146	WDR1, CFL1, DSTN	611	4	19256	23.6367	1	0.148646	0.144303
GOTERM_BP_DIRECT	GO:0030388~fructose 1,6-bisphosphate metabolic process	3	0.483092	0.0311158	PFKL, ALDOC, ALDOA	611	9	19256	10.5052	1	0.429694	0.417139
GOTERM_BP_DIRECT	GO:0032486~Rap protein signal transduction	3	0.483092	0.0455971	RAP1B, RAP1A, RAP2B	611	11	19256	8.59515	1	0.550972	0.534873
GOTERM_BP_DIRECT	GO:0033572~transferrin transport	3	0.483092	0.0380913	TFRC, CLTC, ARHGAP1	611	10	19256	9.45466	1	0.497114	0.482589
GOTERM_BP_DIRECT	GO:0033864~positive regulation of NAD(P)H oxidase activity	3	0.483092	0.018928	CYBA, PARK7, AGT	611	7	19256	13.5067	1	0.319017	0.309696
GOTERM_BP_DIRECT	GO:0034384~high-density lipoprotein particle clearance	3	0.483092	0.018928	APOA2, APOA1, APOE	611	7	19256	13.5067	1	0.319017	0.309696
GOTERM_BP_DIRECT	GO:0034975~protein folding in endoplasmic reticulum	3	0.483092	0.0455971	ERO1A, CANX, CALR	611	11	19256	8.59515	1	0.550972	0.534873
GOTERM_BP_DIRECT	GO:0035088~establishment or maintenance of apical/basal cell polarity	3	0.483092	0.00576146	CDC42, CLIC4, EZR	611	4	19256	23.6367	1	0.148646	0.144303
GOTERM_BP_DIRECT	GO:0036010~protein localization to endosome	3	0.483092	0.0380913	TMEM30A, PACSIN2, VPS35	611	10	19256	9.45466	1	0.497114	0.482589
GOTERM_BP_DIRECT	GO:0044794~positive regulation by host of viral process	3	0.483092	0.0247131	CFL1, APOE, PPIB	611	8	19256	11.8183	1	0.371694	0.360833
GOTERM_BP_DIRECT	GO:0044829~positive regulation by host of viral genome replication	3	0.483092	0.0247131	HSPA8, VAPA, PPIB	611	8	19256	11.8183	1	0.371694	0.360833
GOTERM_BP_DIRECT	GO:0045123~cellular extravasation	3	0.483092	0.00940136	ITGA1, ITGB2, AZU1	611	5	19256	18.9093	1	0.199571	0.19374
GOTERM_BP_DIRECT	GO:0048660~regulation of smooth muscle cell proliferation	3	0.483092	0.0455971	XRCC5, PRKDC, CTNNB1	611	11	19256	8.59515	1	0.550972	0.534873
GOTERM_BP_DIRECT	GO:0051220~cytoplasmic sequestering of protein	3	0.483092	0.0311158	YWHAB, FLNA, DBN1	611	9	19256	10.5052	1	0.429694	0.417139
GOTERM_BP_DIRECT	GO:0051272~positive regulation of cellular component movement	3	0.483092	0.0380913	LYN, RPS19, STMN1	611	10	19256	9.45466	1	0.497114	0.482589
GOTERM_BP_DIRECT	GO:0051597~response to methylmercury	3	0.483092	0.0247131	ALAD, FECH, CPOX	611	8	19256	11.8183	1	0.371694	0.360833
GOTERM_BP_DIRECT	GO:0051683~establishment of Golgi localization	3	0.483092	0.0247131	CDC42, COPG1, YWHAZ	611	8	19256	11.8183	1	0.371694	0.360833
GOTERM_BP_DIRECT	GO:0051873~killing by host of symbiont cells	3	0.483092	0.0380913	GAPDH, CAMP, PF4	611	10	19256	9.45466	1	0.497114	0.482589
GOTERM_BP_DIRECT	GO:0051901~positive regulation of mitochondrial depolarization	3	0.483092	0.0380913	PARP1, RACK1, DCN	611	10	19256	9.45466	1	0.497114	0.482589
GOTERM_BP_DIRECT	GO:0061097~regulation of protein tyrosine kinase activity	3	0.483092	0.00576146	RAP2B, PTPRC, ITGB3	611	4	19256	23.6367	1	0.148646	0.144303
GOTERM_BP_DIRECT	GO:0070934~CRD-mediated mRNA stabilization	3	0.483092	0.0455971	SYNCRIP, HNRNPD, HNRNPU	611	11	19256	8.59515	1	0.550972	0.534873
GOTERM_BP_DIRECT	GO:0090114~COPII-coated vesicle budding	3	0.483092	0.00940136	SEC23A, SEC13, VAPA	611	5	19256	18.9093	1	0.199571	0.19374
GOTERM_BP_DIRECT	GO:0090277~positive regulation of peptide hormone secretion	3	0.483092	0.0380913	FGB, FGA, FGG	611	10	19256	9.45466	1	0.497114	0.482589
GOTERM_BP_DIRECT	GO:0097327~response to antineoplastic agent	3	0.483092	0.0138075	RAP1A, RPL18A, ADAM10	611	6	19256	15.7578	1	0.255859	0.248383
GOTERM_BP_DIRECT	GO:0099072~regulation of postsynaptic specialization membrane neurotransmitter receptor levels	3	0.483092	0.0455971	YWHAE, CTNND1, FLOT2	611	11	19256	8.59515	1	0.550972	0.534873
GOTERM_BP_DIRECT	GO:1900152~negative regulation of nuclear-transcribed mRNA catabolic process, deadenylation-dependent decay	3	0.483092	0.0311158	SYNCRIP, HNRNPD, HNRNPU	611	9	19256	10.5052	1	0.429694	0.417139
GOTERM_BP_DIRECT	GO:1900426~positive regulation of defense response to bacterium	3	0.483092	0.0247131	SIGLEC16, GRN, CYBA	611	8	19256	11.8183	1	0.371694	0.360833
GOTERM_BP_DIRECT	GO:1903028~positive regulation of opsonization	3	0.483092	0.0311158	FCN1, MYO18A, CFP	611	9	19256	10.5052	1	0.429694	0.417139
GOTERM_BP_DIRECT	GO:1904044~response to aldosterone	3	0.483092	0.0138075	PARP1, CYBB, CYBA	611	6	19256	15.7578	1	0.255859	0.248383
GOTERM_BP_DIRECT	GO:2000427~positive regulation of apoptotic cell clearance	3	0.483092	0.0138075	C4B, C3, C2	611	6	19256	15.7578	1	0.255859	0.248383

## Sheet: B-A(CC)
Category	Term	Count	%	PValue	Genes	List Total	Pop Hits	Pop Total	Fold Enrichment	Bonferroni	Benjamini	FDR
GOTERM_CC_DIRECT	GO:0070062~extracellular exosome	336	54.1063	2.12681e-162	APP, RPL5, RPL30, RNH1, RPL3, TFRC, COL12A1, ICAM3, SLC4A1, ENO1, ICAM1, C4B, RPS14, LGALS3, LGALS1, RPS19, DPYSL2, ANPEP, BSG, STMN1, VPS35, CPNE2, RPS11, PRKACA, ACTN2, PRKCB, SERPINF1, ACTN1, RPL23, OMD, HLA-B, P3H1, HLA-A, SND1, PPA1, SUB1, RPL24, SERPING1, TAGLN2, VDAC1, LAP3, PFN1, EZR, ATP6V0D1, RPL28, ALDH7A1, AARS1, ENPEP, CFI, A1BG, IQGAP1, TXN, HPR, THY1, IQGAP2, GNS, ADH5, C2, C3, HPX…	621	2218	20472	4.99398	1.41433e-159	1.41433e-159	1.11232e-159
GOTERM_CC_DIRECT	GO:0005829~cytosol	309	49.7585	2.89785e-35	APP, RPL5, RPL30, RNH1, RPL3, ARL6IP1, RTCB, HNRNPU, ENO1, RPL8, RPL9, MYLK, RPL7, RPS14, GOLGA3, LGALS3, RPS17, LGALS1, RPS19, TFG, SCP2, RPL18A, RPL36AL, PSMD5, DPYSL2, MAGOH, DPYSL3, STMN1, LONP1, RPL35, RPL38, VPS35, RPS11, PRKACA, RPS10, SKP1, ACTN2, PRKCB, ACTN1, RPL23, ANK1, SND1, NUP93, PPA1, CD109, RPL24, TFAM, TAGLN2, LAP3, PFN1, EZR, RPL28, ALDH7A1, AARS1, NUP205, PRKDC, EPB41, IQGAP1,…	621	5477	20472	1.85988	1.92707e-32	3.85414e-33	3.03115e-33
GOTERM_CC_DIRECT	GO:0005737~cytoplasm	256	41.2238	2.03157e-14	APP, RPL5, RPL30, SPARC, RNH1, RPL3, RTCB, ENO1, RPL8, RPL9, MYLK, RPL7, RPS14, LGALS3, RPS17, LGALS1, RPS19, TFG, SCP2, RPL18A, DPYSL2, ANPEP, MAGOH, DPYSL3, STMN1, RPL35, RPL38, CPNE2, RPS11, PRKACA, RPS10, SKP1, PRKCB, ACTN1, RPL23, P3H1, SND1, PPA1, RPL24, LAP3, PFN1, EZR, RPL28, AARS1, ENPEP, IQGAP1, TXN, IQGAP2, PRDX2, LDHB, LDHA, PRDX1, PCBP1, MYO6, PCBP2, S100A13, APOE, ELANE, SEC31A, VAS…	621	5570	20472	1.51514	1.35109e-11	7.11051e-13	5.59218e-13
GOTERM_CC_DIRECT	GO:0016020~membrane	245	39.4525	4.21802e-67	APP, RPL5, RPL30, SPARC, CMAS, ARL6IP1, TFRC, HNRNPU, CISD2, ICAM3, ENO1, RPL8, RPL9, ICAM1, RPL7, RPS14, GOLGA3, PNN, LGALS3, RPS17, RPS19, SCP2, RPL18A, DPYSL2, BSG, STMN1, LONP1, RPL35, RPS11, PRKACA, RPS10, SEC63, RPL23, HLA-B, P3H1, HLA-A, ANK1, SND1, NUP93, RPL24, VDAC1, PFN1, EZR, ATP6V0D1, RPL28, AARS1, NUP205, RPN2, PRKDC, CFI, LDHB, NCSTN, LDHA, PCBP1, MYO6, PCBP2, HMOX1, APOE, XRCC5, P…	621	2547	20472	3.17107	2.80498e-64	1.40249e-64	1.10301e-64
GOTERM_CC_DIRECT	GO:0005886~plasma membrane	207	33.3333	8.98066e-07	APP, SPARC, TFRC, ICAM3, C4BPA, SLC4A1, C4BPB, ENO1, MYLK, ICAM1, C4B, PNN, LGALS3, RPL36AL, DPYSL2, ANPEP, BSG, CPNE2, PRKACA, ACTN2, PRKCB, ACTN1, HLA-B, HLA-A, ANK1, CD109, VDAC1, EZR, ENPEP, EPB41, IQGAP1, THY1, IQGAP2, CFP, C3, TGOLN2, NCSTN, C9, EPB41L2, MYO6, S100A13, APOE, VASP, LYN, SIGLEC16, XRCC5, SURF4, CP, BST2, EHD1, TF, EPRS1, HLA-DRB3, FERMT2, GPI, ARF4, IGHM, CLIC4, ARF1, TGFB1I1…	621	5066	20472	1.34702	0.000597036	1.49969e-05	1.17946e-05
GOTERM_CC_DIRECT	GO:0005634~nucleus	204	32.8502	0.0208367	APP, RPL5, RPL30, CMAS, RPL3, TFRC, RTCB, HNRNPU, HNRNPR, ENO1, RPL9, RPL7, LGALS3, LGALS1, TRIM28, RPL36AL, MAGOH, CPNE2, PRKACA, SKP1, PRKCB, ACTN1, P3H1, ANK1, SND1, SUB1, TFAM, VDAC1, LAP3, PFN1, ALDH7A1, PRKDC, EPB41, IQGAP1, TXN, LDHA, PRDX1, PCBP1, MYO6, PCBP2, S100A13, HMOX1, APOE, DECR1, LYN, XRCC5, PRDX6, H1-0, HNRNPL, HNRNPD, CALR, FERMT2, SERPINA3, CLIC4, ARPC1B, ADIRF, MECP2, SYNCRIP…	621	5930	20472	1.13408	0.999999	0.0888229	0.0698562
GOTERM_CC_DIRECT	GO:0005576~extracellular region	175	28.1804	3.98664e-36	FCN1, APP, SPARC, TFRC, PROS1, COL12A1, TNC, C4BPA, C4BPB, SRP14, EPX, MPO, C4B, LGALS3, LGALS1, ENPP1, HABP2, ACTN2, SERPINF1, ACTN1, OMD, PCOLCE, ILF2, EEF1A1, ILF3, COL4A2, COL4A1, CD109, SERPING1, PRTN3, S100A4, TAGLN2, PPIA, S100A9, KPNB1, CPB2, PSMD11, PSMD13, CFI, FBLN1, A1BG, TXN, THY1, AEBP1, HPR, CFP, LTBP1, GNS, KNG1, C2, C3, CNN2, HPX, C9, S100A13, APOE, A2M, ELANE, TXNDC5, VAT1, HSPA…	621	2127	20472	2.71231	2.65112e-33	6.62779e-34	5.21253e-34
GOTERM_CC_DIRECT	GO:0005615~extracellular space	155	24.9597	3.17794e-30	ERO1A, FCN1, APP, SPARC, TFRC, PROS1, COL12A1, TNC, C4BPA, C4BPB, ENO1, EPX, MPO, ICAM1, C4B, LGALS3, LGALS1, FCGRT, ANPEP, DPYSL3, CFL1, ENPP1, HABP2, SERPINF1, ACTN1, OMD, PCOLCE, EEF1A1, COL4A2, COL4A1, CD109, DNAJB11, SERPING1, PRTN3, S100A4, EZR, PPIA, S100A9, RTN3, COPA, CPB2, CFI, DPT, FBLN1, A1BG, AEBP1, HPR, CFP, KNG1, C2, C3, HPX, PRDX1, C9, CHAD, SERPINH1, PGK1, S100A13, HMOX1, APOE, A…	621	1936	20472	2.63934	2.11333e-27	3.52221e-28	2.7701e-28
GOTERM_CC_DIRECT	GO:0005654~nucleoplasm	150	24.1546	0.00158219	RPL5, NDUFA13, CMAS, RNH1, RTCB, HNRNPU, HNRNPR, PARK7, MPO, ALDH1L2, PPP1CB, RPS14, LGALS3, GOLGA3, RPS17, RPS19, TRIM28, SCP2, PSMD5, MAGOH, LONP1, BANF1, RPS11, PRKACA, RPS10, SKP1, RARS1, RPS8, PRKCB, RPS5, RPL23, RPS6, ANXA11, RPSA, ILF2, SDHB, ILF3, HNRNPUL2, NCL, SUB1, LAP3, UQCRC2, PPIB, UTRN, SNRNP200, S100A9, KPNB1, ATP6V1A, PSMD11, PSMD13, PRKDC, DDX1, GLO1, TXN, MACROH2A2, TGOLN2, PCB…	621	3939	20472	1.25538	0.651107	0.0101169	0.00795659
GOTERM_CC_DIRECT	GO:0005925~focal adhesion	94	15.1369	2.69862e-53	SCARB2, ITGB1, YWHAE, RPL5, RPL30, ARF1, RPL3, YWHAB, TGFB1I1, ITGB3, ARPC1B, CLTC, ITGA2B, GDI2, ITGB2, TNC, HSPB1, RPL8, RPL9, ICAM1, RPL7, MRC2, RPS4X, PPP1CB, RPS14, RPS17, LASP1, RPS19, YWHAQ, BSG, CFL1, FLOT1, FLOT2, CHP1, RPL38, ITGAV, RPS11, RPS10, YWHAG, TGM2, ACTR3, CAP1, ACTR2, RPS8, ACTN2, RPL23, RPS5, ACTN1, ITGA1, RHOG, ADAM10, RPS3A, CYBA, YWHAZ, CAT, MYH9, ITGA6, LAP3, EZR, PFN1, …	621	424	20472	7.30854	1.79458e-50	5.98195e-51	4.7046e-51
GOTERM_CC_DIRECT	GO:0005783~endoplasmic reticulum	92	14.8148	1.11685e-17	ERO1A, FKBP11, FKBP10, SRPX, APP, RPL5, SERPINA1, ADPGK, CTSZ, ATP2A3, CISD2, ATP2A2, DBI, HNRNPR, PARK7, MAGT1, ELAVL1, EEF1B2, SEC61A1, SYNCRIP, SCP2, RPL36AL, CHP1, DNM1L, TGM2, SEC63, TMED4, FGB, FGA, SSR4, RPS8, RPS6, HLA-B, P3H1, RPS3A, CNPY2, HLA-A, PDIA5, CKAP4, TAPBP, EEF1G, RCN3, STIM1, EEF1D, DNAJB11, CANX, CAT, ERP29, RPL24, FKBP9, PPIB, ERGIC1, RTN3, LRRC59, RAB1A, GRN, NDUFB8, RPN2,…	621	1142	20472	2.65577	7.42703e-15	5.7131e-16	4.49316e-16
GOTERM_CC_DIRECT	GO:0005739~mitochondrion	88	14.1707	3.85418e-10	APP, NDUFA13, CLIC4, TFRC, ECI1, CPOX, ETFA, PARK7, ALDH1L2, PPP3CA, ABHD10, CHCHD3, HINT2, SCP2, CPT2, OPA1, FAM162A, BSG, LONP1, RACK1, VPS35, ME2, PRKACA, DNM1L, CLIC1, TGM2, HSDL2, PARP1, ATAD3A, SDHB, COX6B1, ILF3, PKM, TST, DDAH2, GPD2, DNAJC5, NDUFS5, CAT, UQCRC1, TFAM, NDUFS1, VDAC1, UQCRC2, SLC25A5, ALDH7A1, SLC25A6, SLC25A13, RAB7A, BCAT2, NDUFB9, AARS1, NDUFB8, STOML2, FECH, DIABLO, GS…	621	1437	20472	2.01881	2.56303e-07	9.4927e-09	7.46569e-09
GOTERM_CC_DIRECT	GO:0048471~perinuclear region of cytoplasm	63	10.1449	1.57707e-12	ITGB1, APP, PLVAP, CLIC4, ARF1, TFRC, YWHAB, ARHGAP1, ATP2A2, PARK7, LAMP1, KIF5B, RACK1, FLOT2, VPS35, PRKACA, DNM1L, CLIC1, TGM2, RAB8B, SERPINF1, RPS6, STX7, NME2, CKAP4, VAMP8, S100A4, EZR, PPIB, GAPDH, PAFAH1B1, PLEC, SEC23A, USO1, NDRG1, RAP1A, ALOX5, MYO6, S100A13, FLNA, HMOX1, SNCG, SEC31A, LYN, HSPA8, UBE2I, GSN, GALNT2, FUS, SEPTIN2, M6PR, SEPTIN9, PRDX6, EHD1, HNRNPL, MYO1B, TF, VAPA, …	621	763	20472	2.72198	1.04875e-09	4.3698e-11	3.4367e-11
GOTERM_CC_DIRECT	GO:0005788~endoplasmic reticulum lumen	58	9.33977	8.45146e-29	ERO1A, FKBP10, APP, SERPINA1, COL14A1, COL12A1, SERPINA10, CTSZ, TNC, DBI, LGALS1, FGA, AHSG, FGG, APOA2, P3H1, APOA1, ADAM10, CNPY3, PDIA5, CKAP4, RCN3, VCAN, COL2A1, COL4A2, COL4A1, COL6A2, COL6A1, DNAJB11, CANX, ERP29, COL6A3, SERPING1, VWA1, PPIB, SERPINC1, CFP, LTBP1, KNG1, C3, TGOLN2, ESD, SERPINH1, SPP2, APOE, TXNDC5, CRTAP, F10, ERAP1, CP, TF, PROC, COL5A1, P4HA1, COL5A2, CALU, CALR, FBN1	621	306	20472	6.24849	5.62022e-26	8.02889e-27	6.31445e-27
GOTERM_CC_DIRECT	GO:0009986~cell surface	57	9.17874	9.42251e-13	ITGB1, IGHM, SRPX, APP, PLVAP, CLIC4, SPARC, ITGAM, TFRC, ITGB3, ITGA2B, ITGB2, CTSZ, HNRNPU, ENO1, ICAM1, LGALS3, LGALS1, APMAP, MYO18A, ENPP1, ITGAV, CTSG, HLA-DPA1, FGB, FGA, ITGA1, FGG, HLA-B, BGN, APOA1, ADAM10, HLA-A, SPTB, CD109, ERP29, ITGA6, LTF, CD63, CD151, SLC3A2, THY1, IQGAP2, HSPD1, C3, CD59, NCAM1, ELANE, AOC3, BST2, TF, PTPRC, HLA-DRA, CSPG4, CALR, FOLR2, FERMT2	621	638	20472	2.94525	6.26594e-10	2.84817e-11	2.23999e-11
GOTERM_CC_DIRECT	GO:0032991~macromolecular complex	55	8.85668	3.79817e-10	APP, RPL5, ARF1, RPL3, ITGB3, CLTC, CISD2, ATP2A2, HNRNPU, XPO1, TRIM28, SCP2, YWHAQ, DPYSL2, DNM1L, PARP1, RPL23, TUBB, P3H1, SPTB, COL6A2, COL6A1, CANX, CAT, PECAM1, MYH9, TFAM, EZR, PPIB, UTRN, PPIA, LTF, RPL10, PRKDC, EPB41, ATP1A1, IQGAP1, CORO1A, LTBP1, HSPD1, C3, CDC42, STIP1, CRTAP, GSN, XRCC5, ERLIN1, CFHR1, GNB2, UBE2N, CD9, CTNNB1, STT3B, RBMX, RAN	621	703	20472	2.57915	2.52578e-07	9.4927e-09	7.46569e-09
GOTERM_CC_DIRECT	GO:0005789~endoplasmic reticulum membrane	52	8.37359	0.000663807	ERO1A, SCARB2, ARL6IP1, ADPGK, PROS1, RTCB, ATP2A3, CISD2, ATP2A2, MAGT1, SEC61A1, BSG, DNM1L, TMED4, SEC13, SSR4, RHOG, HLA-B, CYBB, CYBA, HLA-A, PDIA5, CKAP4, TAPBP, STIM1, CANX, COPB2, RTN3, LRRC59, COPA, SEC23A, RPN2, COPB1, CDC42, NCSTN, HMOX1, CD59, LNPK, SEC31A, CYB5A, GALNT2, ERAP1, SURF4, ERLIN1, ARCN1, DHRS7, VAPA, CALU, TMEM119, COPG1, CALR, STT3B	621	1052	20472	1.62951	0.356979	0.0048509	0.00381507
GOTERM_CC_DIRECT	GO:0043231~intracellular membrane-bounded organelle	48	7.72947	0.00135711	ATP6V1A, ERO1A, CD63, SERPINA1, SPARC, TFRC, COPB1, HEXA, RTCB, CTSZ, CLTB, CISD2, MPO, XPO1, SCP2, TFG, CTSK, BSG, CTNNA1, PACSIN2, FLOT2, CTSG, ME2, DNM1L, SEC31A, HLA-DPA1, RAB8B, LYN, CYB5A, G6PD, SEC13, RHOG, ADAM10, AZU1, BST2, RCN3, EHD1, P4HA1, DNAJC5, CAT, ATP6V1B2, PRTN3, FAM98B, MNDA, PPIB, GAPDH, PPIA, ERGIC1	621	982	20472	1.61138	0.594684	0.00911591	0.00716936
GOTERM_CC_DIRECT	GO:0072562~blood microparticle	41	6.60225	2.24343e-27	SERPINA3, IGHM, ORM1, TFRC, SERPINC1, PROS1, ITGA2B, SLC2A1, C4BPA, SLC4A1, A1BG, HPR, ITIH1, ORM2, KNG1, C3, C4B, HPX, C9, IGLC2, APOE, A2M, GC, CLIC1, FGB, FGA, HSPA8, GSN, AHSG, FGG, APOA2, APOA1, HBA1, CP, YWHAZ, AGT, TF, ACTC1, CFHR1, SERPING1, PFN1	621	145	20472	9.32147	1.49188e-24	1.65765e-25	1.30368e-25
GOTERM_CC_DIRECT	GO:0015629~actin cytoskeleton	40	6.44122	8.39785e-17	CLIC4, STOML2, WDR1, AHNAK, ARPC1B, LSP1, IQGAP1, IQGAP2, CORO1A, MYLK, CNN3, SPTA1, CALD1, MYO6, CFL1, CTNNA1, FLNA, FLNB, PDLIM5, VASP, ACTR3, ACTR2, GSN, SEPTIN2, DSTN, ARPC5, SEPTIN9, SPTB, H1-0, MYO1D, MYO1B, CAPZA1, CAPZA2, FSCN1, MYH9, EZR, ALDOA, DBN1, MYO1F, MYO1G	621	258	20472	5.11104	7.38298e-14	3.72305e-15	2.92805e-15
GOTERM_CC_DIRECT	GO:0005856~cytoskeleton	38	6.11916	3.87614e-06	TAGLN, STOML2, EPB41, TGFB1I1, HSPB1, CORO1A, SEPTIN11, CNN3, ADD2, CNN2, HINT1, CALD1, BASP1, DPYSL2, EPB41L2, ARHGDIB, CTNNA1, PACSIN2, VASP, ACTN2, TUBB, RHOG, TUBB4B, SEPTIN9, ANK1, CKAP4, SEPTIN7, CAPZA1, FSCN1, TAGLN2, ALDOC, EZR, PFN1, UTRN, S100A9, DBN1, FERMT2, PLEC	621	541	20472	2.31555	0.00257432	5.05418e-05	3.97494e-05
GOTERM_CC_DIRECT	GO:0034774~secretory granule lumen	38	6.11916	4.31293e-28	FCN1, CSTB, GPI, SERPINA3, PSMD11, PSMD13, GSTP1, GDI2, A1BG, SRP14, EPX, C3, ALAD, CAND1, ALOX5, PSMB1, HSPA8, GSN, AHSG, XRCC5, IDH1, PGAM1, NME2, APOA1, ARPC5, EEF2, APRT, PSMA5, EEF1A1, PFKL, TF, PKM, PSMA2, CAT, ALDOC, ALDOA, S100A9, PPIA	621	115	20472	10.8932	2.8681e-25	3.58513e-26	2.81958e-26
GOTERM_CC_DIRECT	GO:1904813~ficolin-1-rich granule lumen	37	5.95813	1.30706e-25	FCN1, CSTB, GPI, SERPINA1, PSMD11, PSMD13, GSTP1, CTSZ, A1BG, SRP14, GNS, ALAD, CAND1, ALOX5, PSMB1, PGM1, HSPA8, ACTR2, GSN, IDH1, PGAM1, NME2, ARPC5, EEF2, ILF2, MMP9, PSMA5, EEF1A1, PFKL, PKM, PSMA2, CAT, ALDOC, MNDA, ALDOA, PPIA, KPNB1	621	124	20472	9.83668	8.69196e-23	7.90178e-24	6.21448e-24
GOTERM_CC_DIRECT	GO:0005765~lysosomal membrane	36	5.7971	3.57788e-09	ATP6V1A, SCARB2, CD63, GRN, ENPEP, RAB5C, AHNAK, SLC3A2, NCSTN, LAMP1, KIF5B, ANPEP, MYO6, FLOT1, ENPP1, ACP2, VPS35, HLA-DPA1, LYN, HSPA8, SEC13, STX7, HLA-B, M6PR, HLA-A, CP, VAMP8, DNAJC5, GNB2, COL6A1, ATP6V1B2, HLA-DRA, UBA1, ATP6V0D1, HLA-DRB3, RAB7A	621	373	20472	3.18172	2.37929e-06	7.67513e-08	6.03623e-08
GOTERM_CC_DIRECT	GO:0000139~Golgi membrane	34	5.47504	0.00270128	ATP6V1A, SCARB2, RTN3, RAB1A, COPB2, COPA, SEC23A, ARF1, COPB1, PROS1, USO1, SLC2A1, CDC42, GOLGA3, NCSTN, BSG, MYO18A, CHP1, CD59, NCAM1, DNM1L, RAB6B, HLA-DPA1, GALNT2, SURF4, HLA-B, ADAM10, HLA-A, TAPBP, ARCN1, VAPA, HLA-DRA, COPG1, HLA-DRB3	621	648	20472	1.72971	0.8345	0.0161833	0.0127276
GOTERM_CC_DIRECT	GO:1990904~ribonucleoprotein complex	33	5.31401	2.20947e-17	RPL5, DDX1, HNRNPU, HNRNPR, IQGAP1, ELAVL1, RPL7, RPS4X, SYNCRIP, XPO1, PABPN1, RPS3, HNRNPA1, HSPA8, HNRNPA3, SSB, XRCC5, RPS8, RPS5, RPS6, RPS3A, EEF2, ILF2, HNRNPL, ILF3, EPRS1, HNRNPH1, NCL, HNRNPA2B1, HNRNPD, SLIRP, GAPDH, RBMX	621	163	20472	6.67414	1.4693e-14	1.0495e-15	8.25394e-16
GOTERM_CC_DIRECT	GO:0042470~melanosome	33	5.31401	6.32089e-24	ITGB1, YWHAE, CD63, RAB1A, RAB5C, AHCY, TFRC, YWHAB, ITGB3, CLTC, SLC2A1, SLC3A2, ATP1A1, SLC1A5, NCSTN, LAMP1, PRDX1, BSG, FLOT1, HSPA8, GSN, SERPINF1, ANXA11, ATP1B3, YWHAZ, SND1, DNAJC5, CANX, ATP6V1B2, ERP29, CALU, PPIB, RAN	621	103	20472	10.562	4.2034e-21	3.50283e-22	2.75486e-22
GOTERM_CC_DIRECT	GO:0005743~mitochondrial inner membrane	32	5.15298	3.6617e-05	NDUFB9, NDUFA13, NDUFB8, STOML2, UQCRB, FECH, TIMM9, NDUFB4, NDUFB3, CPOX, UQCRH, HSPD1, LDHB, LGALS3, CHCHD3, CPT2, OPA1, RPS3, SQOR, IMMT, ATAD3A, SDHB, COX6B1, LETM1, GPD2, NDUFS5, UQCRC1, NDUFS1, UQCRC2, SLC25A5, SLC25A6, SLC25A13	621	464	20472	2.27353	0.0240567	0.000379824	0.000298719
GOTERM_CC_DIRECT	GO:0005840~ribosome	32	5.15298	1.64579e-15	RPL5, RPL3, RPL10, RRBP1, RPL8, RPL9, RPS4X, RPS14, RPS17, RPS19, RPL18A, RPL14, RPS3, RPL35, RPL38, RPS2, RPL15, RPS11, RPS10, RPS8, RPL23, RPS5, RPS6, RPL23A, RPS3A, RPS26, APEX1, RPL27A, CANX, RPL24, RPL28, RPS23	621	175	20472	6.0281	1.10745e-12	6.43796e-14	5.06324e-14
GOTERM_CC_DIRECT	GO:0022626~cytosolic ribosome	32	5.15298	3.29925e-27	RPL5, RPL30, RPL3, RPL10, RPL8, RPL9, RPL7, RPS4X, RPS14, RPS17, RPS19, RPL18A, RPL14, RPS3, RPL35, RPL38, RPS2, RPL15, RPS11, RPL17, RPS10, RPS8, RPL23, RPS5, RPS6, RPL23A, RPSA, RPS3A, RPL27A, RPL24, RPL28, RPS23	621	77	20472	13.7002	2.194e-24	2.194e-25	1.72551e-25
GOTERM_CC_DIRECT	GO:0009897~external side of plasma membrane	30	4.83092	0.000152973	ITGB1, FCN1, IGHM, ENPEP, ITGAM, TFRC, ITGB3, ITGA2B, ITGB2, THY1, ICAM1, LAMP1, FCGRT, ANPEP, CTSK, FLOT1, CLPTM1, NCAM1, ITGAV, IGLC2, FGB, FGA, IGHV3-72, CD163, ITGA1, FGG, PTPRC, CD9, ITGA6, CALR	621	456	20472	2.16883	0.0967308	0.00125509	0.000987088
GOTERM_CC_DIRECT	GO:0098978~glutamatergic synapse	30	4.83092	3.83623e-06	ITGB1, YWHAE, ARF4, ARF1, SPARC, ITGB3, CTNND1, ELAVL1, CORO1A, NDRG1, SEPTIN11, PPP3CA, ACAN, RAP1A, FLOT1, PACSIN2, FLNA, FLOT2, VPS35, APOE, LYN, HSPA8, ACTN2, ACTN1, ADAM10, YWHAZ, ACTC1, CANX, PFN1, DBN1	621	373	20472	2.65144	0.00254785	5.05418e-05	3.97494e-05
GOTERM_CC_DIRECT	GO:0031012~extracellular matrix	30	4.83092	1.48856e-09	LRRC15, ECM1, COL14A1, FBLN1, PRELP, LTBP1, ACAN, CHAD, APOE, TGM2, AHSG, LUM, BGN, DCN, ASPN, VCAN, COL2A1, COL4A2, COL5A1, COL4A1, COL6A2, COL5A2, COL6A1, OGN, COL6A3, ALPL, PTX3, TGFBI, FMOD, FBN1	621	259	20472	3.81848	9.8989e-07	3.29963e-08	2.59505e-08
GOTERM_CC_DIRECT	GO:0045121~membrane raft	30	4.83092	7.12151e-10	ITGB1, APP, STOML2, AHNAK, ATP1A1, THY1, PARK7, IQGAP1, HSPD1, ICAM1, LDHB, TUBA1B, TUBA1A, BSG, FLOT1, SERPINH1, PGK1, LYN, CAVIN2, TUBB, ITGA1, ERLIN1, EEF2, BST2, RAP2B, PTPRC, MYADM, PECAM1, VDAC1, SLC25A5	621	251	20472	3.94018	4.73581e-07	1.63304e-08	1.28433e-08
GOTERM_CC_DIRECT	GO:0045202~synapse	29	4.66989	0.000995076	RTN3, APP, RPL5, RPL3, RPL10, ITGB3, GDI2, SLC3A2, C4B, RPS4X, RPS17, YWHAQ, DPYSL3, SNCG, RPL38, FGB, AKR1A1, RPS3A, EEF2, EIF2S1, FABP5, HNRNPD, RPL24, CTNNB1, VDAC1, UTRN, RPS23, EIF3B, PAFAH1B1	621	488	20472	1.95906	0.48421	0.0067523	0.00531046
GOTERM_CC_DIRECT	GO:0005759~mitochondrial matrix	27	4.34783	0.000157764	NDUFB8, FECH, ECI1, ETFA, PARK7, HSD17B10, ALDH1L2, HSPD1, ACAT1, ABHD10, PITRM1, OXCT1, LONP1, RPS3, ME2, DECR1, PCK2, SOD2, GARS1, GLUD1, ALDH6A1, TST, TFAM, NDUFS1, SSBP1, ALDH7A1, BCAT2	621	390	20472	2.28227	0.0996046	0.00126401	0.000994103
GOTERM_CC_DIRECT	GO:0031982~vesicle	27	4.34783	1.81344e-11	DYNC1I2, DCTN2, AHNAK, GSTP1, GDI2, BASP1, KIF5B, MYO6, CFL1, FLOT2, CD59, CLIC1, STX7, YWHAZ, VAMP8, MYO1D, MYO1B, TF, PKM, VAPA, GNB2, TAGLN2, EZR, GAPDH, PPIA, MYO1F, MYO1G	621	174	20472	5.11544	1.20594e-08	4.82374e-10	3.79371e-10
GOTERM_CC_DIRECT	GO:0005769~early endosome	25	4.02576	2.49863e-05	APP, RAB1A, RAB5C, TFRC, DYSF, CORO1A, HSPD1, EEA1, NCSTN, RAP1A, FLOT1, PACSIN2, VPS35, APOE, AOC3, STX7, APOA2, APOA1, VAMP8, MYO1D, EHD1, MYO1B, TF, ATP6V0D1, LTF	621	308	20472	2.67583	0.0164788	0.000267998	0.000210772
GOTERM_CC_DIRECT	GO:0014069~postsynaptic density	25	4.02576	2.23191e-06	RTN3, RPL30, ARF1, EPB41, ATP1A1, RPL8, RPL7, CNN3, ADD2, RPS14, RPS19, RPL18A, PCBP2, RPL14, RPS3, RPL38, VPS35, PDLIM5, LYN, ACTR2, HNRNPA3, RPL23, ADAM10, FABP5, DBN1	621	267	20472	3.08672	0.00148312	3.22656e-05	2.53758e-05
GOTERM_CC_DIRECT	GO:0035578~azurophil granule lumen	25	4.02576	1.87836e-16	PYGB, SERPINA3, GRN, GDI2, MPO, ORM2, GNS, C3, CTSG, ELANE, TXNDC5, CAP1, VAT1, ACTR2, DYNC1H1, GCA, TUBB, DEFA3, AZU1, TUBB4B, LYZ, PRDX6, FABP5, PRTN3, MNDA	621	91	20472	9.05664	1.4766e-13	7.80695e-15	6.1399e-15
GOTERM_CC_DIRECT	GO:0010008~endosome membrane	24	3.86473	2.99674e-06	ITGB1, ATP6V1A, SCARB2, CD63, SUN2, TFRC, HLA-B, ARHGAP1, HLA-A, EHD1, TF, MYO1B, NCSTN, RAP1A, LAMP1, FCGRT, HLA-DRA, PLIN3, UBA1, VPS35, HLA-DRB3, ATP6V0D1, RAB7A, HLA-DPA1	621	253	20472	3.12723	0.00199085	4.15174e-05	3.2652e-05
GOTERM_CC_DIRECT	GO:0016324~apical plasma membrane	21	3.38164	0.0106989	ATP6V1A, ENPEP, TMEM30A, ITGB3, SLC2A1, AKR1A1, AP2A1, ATP1B3, SLC3A2, CYBA, ATP1A1, THY1, SEPTIN7, BST2, TF, CTSK, ATP6V1B2, CD9, CSPG4, EZR, ATP6V0D1	621	374	20472	1.85104	0.999218	0.0497538	0.0391296
GOTERM_CC_DIRECT	GO:0005768~endosome	21	3.38164	0.00170694	APP, GRN, RAB5C, TFRC, STX7, CLTC, DYSF, M6PR, CYBA, ARPC5, ATP1A1, MYO1D, TGOLN2, BSG, FLOT1, PACSIN2, FLOT2, PLIN3, VPS35, EZR, RAB8B	621	317	20472	2.18388	0.678926	0.0107086	0.00842197
GOTERM_CC_DIRECT	GO:0030027~lamellipodium	21	3.38164	1.65058e-06	ITGB1, VASP, ACTR3, ACTR2, GSN, CTNND1, NME2, ARPC5, IQGAP2, CORO1A, MYLK, ACTC1, CFL1, DPYSL3, FSCN1, FLOT1, CTNNA1, FLOT2, CTNNB1, DBN1, MYO1G	621	192	20472	3.60568	0.00109703	2.55753e-05	2.01141e-05
GOTERM_CC_DIRECT	GO:0031093~platelet alpha granule lumen	21	3.38164	4.78792e-15	FGB, FGA, SERPINA3, APP, ORM1, SERPINA1, SPARC, AHSG, ACTN2, ACTN1, PROS1, FGG, A1BG, ORM2, KNG1, MMRN1, SERPING1, A2M, ALDOA, PF4, FERMT3	621	67	20472	10.3327	3.17468e-12	1.76887e-13	1.39116e-13
GOTERM_CC_DIRECT	GO:0005635~nuclear envelope	20	3.22061	7.39832e-06	SUN2, LRRC59, SEC13, NUP205, UBE2I, PARP1, CBX3, RTCB, CYBB, ANXA11, NUP93, XPO1, ALOX5, TPR, BANF1, CALR, CLIC1, RAN, KPNB1, PAFAH1B1	621	194	20472	3.39858	0.00490782	9.11089e-05	7.16541e-05
GOTERM_CC_DIRECT	GO:0005911~cell-cell junction	20	3.22061	6.36434e-06	ACTR3, APP, CLIC4, WDR1, ITGB3, ACTN1, CTNND1, CORO1A, CDC42, CNN2, RAP1B, PNN, FSCN1, FLOT1, MYADM, PACSIN2, PECAM1, CTNNA1, FLNA, CTNNB1	621	192	20472	3.43398	0.00422335	7.98544e-05	6.28028e-05
GOTERM_CC_DIRECT	GO:0043005~neuron projection	19	3.05958	0.0413241	GPI, RTN3, CAMK2D, ARF1, HNRNPA3, AHCY, ITGA1, PARK7, IQGAP1, ANK1, MYO1D, CDC42, RAP1A, STMN1, S100A4, NCAM1, FLNB, VPS35, PAFAH1B1	621	379	20472	1.65266	1	0.151826	0.119406
GOTERM_CC_DIRECT	GO:0005874~microtubule	19	3.05958	0.0108675	DYNC1H1, DYNC1I2, DCTN2, TUBB, IQGAP1, IQGAP2, TUBB4B, SEPTIN9, NDRG1, TUBA1B, TUBB2B, TUBA1A, STIM1, OPA1, DPYSL2, KIF5B, STMN1, DNM1L, PAFAH1B1	621	326	20472	1.92134	0.999301	0.0501867	0.0394701
GOTERM_CC_DIRECT	GO:0005764~lysosome	19	3.05958	0.00644846	SCARB2, HSPA8, GRN, TINAGL1, HEXA, STX7, CTSZ, CLTC, MPO, GNS, LAMP1, CTSK, CAT, HLA-DRA, CTSG, ACP2, VPS35, CALR, RAB7A	621	309	20472	2.02705	0.98646	0.0335018	0.026348
GOTERM_CC_DIRECT	GO:0005938~cell cortex	19	3.05958	2.5739e-06	FGB, DYNC1H1, EPB41, SEPTIN2, CTSZ, RHOG, ENO1, CORO1A, MYO1D, NCL, EPB41L2, MYO6, FSCN1, FLNA, CTNNB1, FLNB, PFN1, FERMT2, PAFAH1B1	621	164	20472	3.81925	0.00171018	3.64179e-05	2.86414e-05
GOTERM_CC_DIRECT	GO:0022625~cytosolic large ribosomal subunit	19	3.05958	1.01813e-13	RPL5, RPL30, RPL3, RPL10, RPL23, RPL23A, RPL8, RPL9, RPL7, RPL18A, RPL36AL, RPL27A, RPL14, RPL24, RPL35, RPL38, RPL15, RPL28, RPL17	621	60	20472	10.4393	6.7702e-11	3.38529e-12	2.66241e-12
GOTERM_CC_DIRECT	GO:0031410~cytoplasmic vesicle	18	2.89855	0.0210022	ENPEP, TFRC, CTSZ, DYSF, RHOG, APOA1, CLTA, AP2A2, ELAVL1, ADD2, MYO1D, TF, MYO6, ARHGDIB, ESD, FLOT1, FLOT2, RAB6B	621	325	20472	1.82582	0.999999	0.0889585	0.0699629
GOTERM_CC_DIRECT	GO:0042383~sarcolemma	18	2.89855	1.94664e-08	ITGB1, CAMK2D, AHNAK, DYSF, SLC2A1, BGN, ATP1A1, ANK1, PPP3CA, NCSTN, LAMP1, COL6A2, BSG, COL6A1, FLOT1, COL6A3, UTRN, PLEC	621	106	20472	5.59803	1.29451e-05	3.80741e-07	2.9944e-07
GOTERM_CC_DIRECT	GO:0043202~lysosomal lumen	18	2.89855	4.11612e-09	SCARB2, HSPA8, LUM, HEXA, OMD, BGN, PRELP, GNS, DCN, ACAN, VCAN, CTSK, OGN, ACP2, CSPG4, GC, FMOD, TXNDC5	621	96	20472	6.18116	2.73722e-06	8.55381e-08	6.72728e-08
GOTERM_CC_DIRECT	GO:0030864~cortical actin cytoskeleton	18	2.89855	1.40882e-12	CAP1, GSN, WDR1, ACTN2, ACTN1, SLC2A1, DSTN, IQGAP1, CORO1A, SPTB, SPTA1, EEF1A1, LASP1, FLOT1, MYADM, FLOT2, UTRN, DBN1	621	60	20472	9.88986	9.36901e-10	4.07334e-11	3.20354e-11
GOTERM_CC_DIRECT	GO:0022627~cytosolic small ribosomal subunit	17	2.73752	1.76545e-13	RPS8, RPS5, RPS6, RPS3A, RPSA, HBA1, RPS4X, RPS26, RPS14, RPS17, RPS19, RPS3, RACK1, RPS2, RPS11, RPS10, RPS23	621	46	20472	12.1832	1.17389e-10	5.5906e-12	4.39682e-12
GOTERM_CC_DIRECT	GO:0031965~nuclear membrane	16	2.57649	0.0069004	SUN2, NUP205, SURF4, ATP2A3, TOR1AIP1, PML, NUP93, XPO1, VAPA, ALOX5, MYO6, TPR, GAPDH, CLIC1, KPNB1, PAFAH1B1	621	241	20472	2.18863	0.989995	0.0355718	0.027976
GOTERM_CC_DIRECT	GO:0016323~basolateral plasma membrane	16	2.57649	0.00616852	TFRC, EPB41, SLC2A1, AP2A1, ATP1B3, SLC3A2, SLC4A1, ATP1A1, ANK1, MYO1D, BSG, FLOT1, ENPP1, FLOT2, CTNNB1, EZR	621	238	20472	2.21621	0.98367	0.0322997	0.0254026
GOTERM_CC_DIRECT	GO:0030054~cell junction	16	2.57649	0.00492343	WDR1, EPB41, ACTN2, ITGB3, ACTN1, CTNND1, SPTB, SPTA1, RAP1A, BASP1, EPB41L2, CTNNA1, CTNNB1, UTRN, S100A9, FERMT2	621	232	20472	2.27353	0.962453	0.0272449	0.0214272
GOTERM_CC_DIRECT	GO:0042995~cell projection	16	2.57649	0.000472972	VASP, ACTR3, WDR1, ACTN2, ACTN1, RHOG, SPTB, ASPN, CDC42, SPTA1, KCTD12, EZR, UTRN, PDLIM5, CAMP, FERMT3	621	183	20472	2.88229	0.26992	0.003534	0.00277937
GOTERM_CC_DIRECT	GO:1903561~extracellular vesicle	16	2.57649	8.1983e-05	FGB, FGA, TFRC, ITGB2, COL12A1, CLTC, APOA1, PRELP, ATP1A1, TUBB4B, PKM, COL6A2, OGN, CD9, COL6A3, APOE	621	156	20472	3.38115	0.0530613	0.000736739	0.00057942
GOTERM_CC_DIRECT	GO:0030426~growth cone	16	2.57649	4.83421e-05	APP, COPA, DCTN2, CTSZ, CTNND1, HNRNPR, ARPC5, IQGAP1, THY1, STIM1, BASP1, DPYSL2, CFL1, DPYSL3, FSCN1, DBN1	621	149	20472	3.53999	0.031637	0.000468318	0.000368316
GOTERM_CC_DIRECT	GO:0005796~Golgi lumen	16	2.57649	7.09721e-07	ERO1A, APP, F10, LUM, PROS1, OMD, BGN, DEFA3, PRELP, DCN, ACAN, VCAN, PROC, OGN, CSPG4, FMOD	621	106	20472	4.97603	0.000471853	1.24201e-05	9.768e-06
GOTERM_CC_DIRECT	GO:0015630~microtubule cytoskeleton	15	2.41546	0.00279654	CLIC4, SEPTIN2, TUBB, IQGAP1, TUBB4B, SEPTIN9, NDRG1, SEPTIN11, SEPTIN7, TUBA1B, TUBB2B, TUBA1A, VAPA, CHP1, GAPDH	621	197	20472	2.51012	0.844686	0.0166045	0.0130589
GOTERM_CC_DIRECT	GO:0005912~adherens junction	15	2.41546	0.00091629	LYN, CTNND1, ADAM10, PARK7, NDRG1, CNN3, FLOT1, CTNNA1, FLOT2, MYH9, CTNNB1, ITGA6, EZR, PDLIM5, FERMT2	621	175	20472	2.82567	0.456438	0.00634722	0.00499187
GOTERM_CC_DIRECT	GO:0030133~transport vesicle	15	2.41546	1.89394e-06	ATP6V1A, COPB2, COPA, COPB1, USO1, SURF4, M6PR, BGN, ARCN1, TGOLN2, ERP29, PLIN3, CHP1, CD59, COPG1	621	100	20472	4.94493	0.00125868	2.79883e-05	2.20118e-05
GOTERM_CC_DIRECT	GO:1904724~tertiary granule lumen	15	2.41546	6.53834e-10	CSTB, ORM1, IDH1, PRG3, LYZ, CFP, ILF2, MMP9, CNN2, ALDOC, PTX3, ALDOA, PGM1, CAMP, LTF	621	55	20472	8.99078	4.348e-07	1.55286e-08	1.22127e-08
GOTERM_CC_DIRECT	GO:0030667~secretory granule membrane	14	2.25443	1.12765e-05	COPB1, HLA-B, RHOG, IQGAP1, IQGAP2, AP2A2, VAMP8, DIAPH1, LGALS3, PTPRC, FABP5, ANPEP, PECAM1, RAB7A	621	101	20472	4.56957	0.00747087	0.000133908	0.000105314
GOTERM_CC_DIRECT	GO:0005581~collagen trimer	14	2.25443	3.95677e-06	FCN1, COL14A1, COL12A1, PCOLCE, COL2A1, COL4A2, COL5A1, P4HA1, COL4A1, COL6A2, COL5A2, COL6A1, SERPINH1, COL6A3	621	92	20472	5.01659	0.0026278	5.0601e-05	3.9796e-05
GOTERM_CC_DIRECT	GO:0005758~mitochondrial intermembrane space	14	2.25443	3.07799e-06	LYN, FKBP10, STOML2, DIABLO, TIMM9, COX17, IMMT, CPOX, PARK7, OPA1, NDUFS5, CAT, ALPL, NDUFS1	621	90	20472	5.12807	0.00204477	4.17727e-05	3.28528e-05
GOTERM_CC_DIRECT	GO:0030175~filopodium	14	2.25443	9.02072e-07	ITGB1, VASP, DYNC1H1, ACTN2, IQGAP2, CDC42, MYO1B, ACTC1, MYO6, FSCN1, ITGA6, EZR, UTRN, MYO1G	621	81	20472	5.69786	0.000599698	1.49969e-05	1.17946e-05
GOTERM_CC_DIRECT	GO:0030669~clathrin-coated endocytic vesicle membrane	14	2.25443	1.54749e-07	SCARB2, TFRC, CLTC, M6PR, AP2A1, AP2A2, VAMP8, TGOLN2, TF, CD9, HLA-DRA, APOE, HLA-DRB3, HLA-DPA1	621	70	20472	6.59324	0.000102903	2.94023e-06	2.31239e-06
GOTERM_CC_DIRECT	GO:0035577~azurophil granule membrane	14	2.25443	1.43573e-08	CD63, TMEM30A, RAB5C, SURF4, AZU1, MAGT1, CKAP4, VAMP8, BST2, RAP1B, NCSTN, VAPA, LAMP1, DNAJC5	621	58	20472	7.95735	9.54756e-06	2.89321e-07	2.27542e-07
GOTERM_CC_DIRECT	GO:0043197~dendritic spine	13	2.0934	0.00522111	ITGB1, ARF4, APP, ACTN2, ACTN1, CTNND1, ADAM10, SEPTIN11, CNN3, CDC42, PPP3CA, CANX, PRKACA	621	168	20472	2.55095	0.969228	0.0280678	0.0220744
GOTERM_CC_DIRECT	GO:0030018~Z disc	13	2.0934	0.000783849	ACTN2, ACTN1, SLC2A1, HSPB1, SLC4A1, ANK1, FKBP1A, PPP3CA, FLNA, CTNNB1, FLNB, PDLIM5, PLEC	621	134	20472	3.19821	0.406349	0.00560494	0.0044081
GOTERM_CC_DIRECT	GO:0005604~basement membrane	13	2.0934	2.65385e-05	CD151, SPARC, SERPINF1, TNC, FBLN1, ACAN, COL2A1, COL4A2, COL5A1, COL4A1, VWA1, TGFBI, FBN1	621	94	20472	4.55915	0.0174935	0.000280129	0.000220312
GOTERM_CC_DIRECT	GO:0035579~specific granule membrane	13	2.0934	1.90399e-05	ITGAM, TMEM30A, ITGB2, CYBB, ADAM10, CYBA, CKAP4, VAMP8, RAP1A, RAP2B, DNAJC5, ITGAV, CD59	621	91	20472	4.70945	0.0125818	0.000211025	0.000165964
GOTERM_CC_DIRECT	GO:0071013~catalytic step 2 spliceosome	13	2.0934	1.51348e-05	SF3A3, SF3B2, HNRNPA3, HNRNPU, HNRNPR, PNN, SYNCRIP, HNRNPH1, HNRNPA2B1, MAGOH, HNRNPA1, SNRNP200, RBMX	621	89	20472	4.81529	0.0100143	0.000173138	0.000136167
GOTERM_CC_DIRECT	GO:0001725~stress fiber	13	2.0934	1.82108e-06	ACTN1, CYBA, SEPTIN9, LPP, SEPTIN11, SEPTIN7, MYLK, CNN2, FSCN1, MYH9, FLNB, PDLIM5, FERMT2	621	73	20472	5.87069	0.00121029	2.75231e-05	2.1646e-05
GOTERM_CC_DIRECT	GO:0005903~brush border	13	2.0934	2.89846e-07	ACTR3, ENPEP, ACTN1, MYO1D, MYO1B, CAPZA2, FLNA, MYH9, FLNB, EZR, DNM1L, CLIC1, PLEC	621	62	20472	6.91226	0.000192729	5.20939e-06	4.09701e-06
GOTERM_CC_DIRECT	GO:0035580~specific granule lumen	13	2.0934	2.89846e-07	ORM1, CTSZ, PRG3, LYZ, CFP, ORM2, ILF2, CNN2, PTX3, ELANE, CAMP, KPNB1, LTF	621	62	20472	6.91226	0.000192729	5.20939e-06	4.09701e-06
GOTERM_CC_DIRECT	GO:0030496~midbody	12	1.93237	0.0256566	CDC42, CLIC4, SEPTIN2, CTNND1, SLC2A1, RACK1, ANXA11, HNRNPU, LAP3, IQGAP1, RAN, SEPTIN7	621	185	20472	2.13835	1	0.102165	0.0803497
GOTERM_CC_DIRECT	GO:0001726~ruffle	12	1.93237	0.000242403	ITGB1, GSN, ACTN1, MYO6, FSCN1, MYADM, ATP6V1B2, NME2, MYH9, CSPG4, IQGAP1, EZR	621	101	20472	3.91677	0.148893	0.00189645	0.00149149
GOTERM_CC_DIRECT	GO:0005884~actin filament	12	1.93237	0.000127391	DIAPH1, MYO1B, ACTC1, ACTN2, ACTN1, MYO6, FLNA, PLS3, IQGAP1, EZR, CORO1A, DBN1	621	94	20472	4.20845	0.0812308	0.00108609	0.000854172
GOTERM_CC_DIRECT	GO:0005902~microvillus	12	1.93237	1.16476e-05	MYO1D, ATP6V1A, AOC3, CLIC4, MYO1B, MYO6, FSCN1, ATP6V1B2, IQGAP2, EZR, MYO1F, MYO1G	621	73	20472	5.4191	0.00771577	0.000135889	0.000106872
GOTERM_CC_DIRECT	GO:0000502~proteasome complex	12	1.93237	9.36278e-07	PSMA5, PSMA6, PSMD11, PSMC6, PSMB2, PSMA2, PSMD13, PSMD5, PSMC1, PSMB1, HSPB1, PSMA7	621	57	20472	6.94025	0.000622432	1.5186e-05	1.19433e-05
GOTERM_CC_DIRECT	GO:0000781~chromosome, telomeric region	11	1.77134	0.0381988	PPP1CB, SUN2, SSB, PARP1, XRCC5, CBX3, PRKDC, APEX1, HNRNPA2B1, MACROH2A2, PML	621	173	20472	2.09612	1	0.141123	0.110989
GOTERM_CC_DIRECT	GO:0005819~spindle	11	1.77134	0.0147925	CBX3, SEPTIN2, CLTC, RPS3, HSPB1, MYH9, ANXA11, CLTA, SNCG, SEPTIN7, PAFAH1B1	621	148	20472	2.45019	0.99995	0.0651456	0.0512348
GOTERM_CC_DIRECT	GO:0005770~late endosome	11	1.77134	0.0147925	HSPA8, GRN, ARF1, TF, RAP1A, LAMP1, STX7, DYSF, M6PR, VPS35, RAB7A	621	148	20472	2.45019	0.99995	0.0651456	0.0512348
GOTERM_CC_DIRECT	GO:0016363~nuclear matrix	11	1.77134	0.00591491	PSMA6, CLIC4, SPARC, BASP1, ALOX5, TGFB1I1, NONO, CFL1, HNRNPA2B1, HNRNPU, PML	621	129	20472	2.81107	0.980651	0.0312176	0.0245516
GOTERM_CC_DIRECT	GO:0032587~ruffle membrane	11	1.77134	0.000836524	ITGB1, EEF1A1, DIAPH1, ARF4, ITGB3, CFL1, MYO6, PACSIN2, RPS3, ITGAV, EZR	621	99	20472	3.66291	0.4268	0.00591796	0.00465428
GOTERM_CC_DIRECT	GO:0036464~cytoplasmic ribonucleoprotein granule	11	1.77134	0.00020104	CDC42, RPS4X, TUBA1A, NCL, PCBP1, TUBB, RPS6, HNRNPU, IQGAP1, RPL28, CKAP4	621	83	20472	4.36901	0.125152	0.00159156	0.00125171
GOTERM_CC_DIRECT	GO:0030670~phagocytic vesicle membrane	11	1.77134	7.5748e-05	VAMP8, HLA-B, CYBB, CYBA, HLA-A, CALR, ATP6V0D1, CORO1A, RAB8B, RAB7A, TAPBP	621	74	20472	4.90038	0.0491266	0.000690033	0.000542688
GOTERM_CC_DIRECT	GO:0030666~endocytic vesicle membrane	11	1.77134	5.2808e-05	LYN, SCARB2, CAMK2D, CD163, STAB1, CD9, HLA-DRA, AP2A1, HLA-DRB3, AP2A2, HLA-DPA1	621	71	20472	5.10744	0.0345088	0.000501676	0.000394551
GOTERM_CC_DIRECT	GO:0045335~phagocytic vesicle	11	1.77134	4.10559e-05	CDC42, RAP1A, GSN, KIF5B, ANXA11, ITGAV, FLNB, CORO1A, ELANE, RAB8B, RAB7A	621	69	20472	5.25548	0.0269334	0.000413669	0.000325337
GOTERM_CC_DIRECT	GO:0031966~mitochondrial membrane	10	1.61031	0.0498045	NDUFA13, OPA1, FAM162A, NME2, ALPL, VDAC1, DNM1L, SDHB, RAB7A, COX6B1	621	157	20472	2.09976	1	0.179658	0.141295
GOTERM_CC_DIRECT	GO:0072686~mitotic spindle	10	1.61031	0.0268079	CDC42, DIAPH1, TUBB2B, EPB41, TUBB, TPR, CLTC, RPS3, HNRNPU, TUBB4B	621	140	20472	2.35473	1	0.106114	0.0834555
GOTERM_CC_DIRECT	GO:0008021~synaptic vesicle	10	1.61031	0.0237141	APP, NCSTN, SYNGR2, LAMP1, SEPTIN2, STX7, ADAM10, VDAC1, ATP6V0D1, RAB8B	621	137	20472	2.40629	1	0.095575	0.0751665
GOTERM_CC_DIRECT	GO:0055037~recycling endosome	10	1.61031	0.0199967	VAMP8, ITGB1, EEA1, APP, TF, TUBA1A, TFRC, STX7, RAN, LTF	621	133	20472	2.47866	0.999999	0.0863495	0.067911
GOTERM_CC_DIRECT	GO:0005681~spliceosomal complex	10	1.61031	0.0131982	SF3A3, HSPA8, LGALS3, SF3B2, NCL, HNRNPA2B1, HNRNPR, HNRNPA1, SNRNP200, RBMX	621	124	20472	2.65856	0.999854	0.0589047	0.0463266
GOTERM_CC_DIRECT	GO:0030141~secretory granule	10	1.61031	0.00311341	CDC42, ATP6V1A, GARS1, CTSG, CYBA, CFP, MPO, ELANE, HSPD1, LTF	621	99	20472	3.32992	0.874274	0.0183223	0.0144098
GOTERM_CC_DIRECT	GO:0005793~endoplasmic reticulum-Golgi intermediate compartment	10	1.61031	0.000691422	ANPEP, COPB1, SURF4, MYO18A, SERPINH1, CHP1, COPG1, RAB6B, ERGIC1, TMED4	621	80	20472	4.12077	0.368688	0.00499778	0.00393058
GOTERM_CC_DIRECT	GO:0005791~rough endoplasmic reticulum	10	1.61031	9.79369e-05	SEC61A1, APP, PKM, RPN2, F12, CANX, CYBB, CKAP4, HSPD1, RPS23	621	62	20472	5.31713	0.0630555	0.000856948	0.000673961
GOTERM_CC_DIRECT	GO:0009898~cytoplasmic side of plasma membrane	10	1.61031	8.59991e-05	PPP3CA, G6PD, PTPRC, EPB41, DIABLO, MYH9, AP2A1, SLC4A1, AP2A2, ANK1	621	61	20472	5.40429	0.0555872	0.000762526	0.000599701
GOTERM_CC_DIRECT	GO:0012507~ER to Golgi transport vesicle membrane	10	1.61031	4.29744e-05	SEC23A, SEC13, USO1, HLA-B, HLA-DRA, CD59, HLA-A, HLA-DRB3, SEC31A, HLA-DPA1	621	56	20472	5.88682	0.0281741	0.000426537	0.000335457
GOTERM_CC_DIRECT	GO:0055038~recycling endosome membrane	9	1.44928	0.0123045	VAMP8, EHD1, RAP2B, TFRC, HLA-B, PACSIN2, HLA-A, NDRG1, RAB8B	621	102	20472	2.90878	0.999734	0.0564309	0.044381
GOTERM_CC_DIRECT	GO:0005901~caveola	9	1.44928	0.00226875	PLVAP, CAVIN2, SLC2A1, FLOT1, PACSIN2, HMOX1, FLOT2, ATP1B3, ATP1A1	621	77	20472	3.85319	0.779185	0.0138414	0.0108858
GOTERM_CC_DIRECT	GO:0070821~tertiary granule membrane	9	1.44928	0.0016101	VAMP8, ITGAM, RAP2B, COPB1, ITGB2, CYBB, ADAM10, CD59, CYBA	621	73	20472	4.06432	0.657533	0.0101973	0.00801984
GOTERM_CC_DIRECT	GO:0042645~mitochondrial nucleoid	9	1.44928	6.38674e-05	LRRC59, LONP1, TFAM, VDAC1, SSBP1, SLC25A5, SOD2, HSD17B10, ATAD3A	621	46	20472	6.44991	0.0415838	0.000589886	0.000463926
GOTERM_CC_DIRECT	GO:0005844~polysome	9	1.44928	9.66917e-06	RPS4X, PSMA6, FUS, RPS6, RPS3, HDLBP, CALR, EEF2, EIF2S1	621	36	20472	8.24155	0.0064094	0.000116909	9.1945e-05
GOTERM_CC_DIRECT	GO:0015935~small ribosomal subunit	9	1.44928	1.65374e-06	RPS26, RPS4X, RPS5, RPS6, RPS3, RACK1, RPSA, RPS2, RPS23	621	29	20472	10.2309	0.00109914	2.55753e-05	2.01141e-05
GOTERM_CC_DIRECT	GO:0005811~lipid particle	8	1.28824	0.0370064	RAP1B, EHD1, RAB5C, SYNGR2, PLIN3, GAPDH, CKAP4, RAB7A	621	103	20472	2.56048	1	0.138097	0.108608
GOTERM_CC_DIRECT	GO:0032588~trans-Golgi network membrane	8	1.28824	0.0353748	APP, MYO1B, CLTC, M6PR, HLA-DRA, CLTA, HLA-DRB3, HLA-DPA1	621	102	20472	2.58558	1	0.13366	0.105119
GOTERM_CC_DIRECT	GO:0044297~cell body	8	1.28824	0.0163895	ACTC1, TUBB, GNB2, DPYSL3, RPS6, PARK7, EZR, RPL28	621	87	20472	3.03137	0.999983	0.0712356	0.0560244
GOTERM_CC_DIRECT	GO:0045177~apical part of cell	8	1.28824	0.00933091	CDC42, APP, CLIC4, ENPEP, MYO1B, MYO6, CTNNB1, EZR	621	78	20472	3.38115	0.998039	0.0443218	0.0348576
GOTERM_CC_DIRECT	GO:0031594~neuromuscular junction	8	1.28824	0.00933091	ITGB1, APP, TUBA1A, SYNGR2, DNAJC5, MYH9, UTRN, PRKACA	621	78	20472	3.38115	0.998039	0.0443218	0.0348576
GOTERM_CC_DIRECT	GO:0030139~endocytic vesicle	8	1.28824	0.00407764	EHD1, TF, RAB5C, STX7, MYO6, DYSF, FLOT2, APOA1	621	67	20472	3.93626	0.933939	0.0227868	0.0179211
GOTERM_CC_DIRECT	GO:0001772~immunological synapse	8	1.28824	0.000376898	LGALS3, STOML2, STX7, HLA-DRA, MYH9, EZR, CORO1A, ICAM1	621	45	20472	5.86065	0.221732	0.00288089	0.00226572
GOTERM_CC_DIRECT	GO:0044853~plasma membrane raft	8	1.28824	5.96038e-05	MYO1D, ITGAM, STIM1, ITGB2, PRTN3, EZR, PRKACA, ADD2	621	34	20472	7.75675	0.0388624	0.00055826	0.000439053
GOTERM_CC_DIRECT	GO:0042788~polysomal ribosome	8	1.28824	4.85924e-05	RPS26, RPL30, RPL18A, RPL24, RPL38, EEF2, RPL8, RPS23	621	33	20472	7.9918	0.0317982	0.000468318	0.000368316
GOTERM_CC_DIRECT	GO:0071556~integral component of lumenal side of endoplasmic reticulum membrane	8	1.28824	1.97225e-05	CANX, HLA-B, HLA-DRA, HLA-A, CALR, HLA-DRB3, HLA-DPA1, TAPBP	621	29	20472	9.09412	0.01303	0.000215008	0.000169097
GOTERM_CC_DIRECT	GO:0008305~integrin complex	8	1.28824	1.53611e-05	ITGB1, ITGAM, ITGB3, ITGA1, ITGB2, ITGA2B, ITGAV, ITGA6	621	28	20472	9.41891	0.0101632	0.000173138	0.000136167
GOTERM_CC_DIRECT	GO:0033116~endoplasmic reticulum-Golgi intermediate compartment membrane	7	1.12721	0.0325589	SERPINA1, CTSZ, SURF4, CD59, CALR, ERGIC1, TAPBP	621	79	20472	2.92105	1	0.126618	0.0995809
GOTERM_CC_DIRECT	GO:0005747~mitochondrial respiratory chain complex I	7	1.12721	0.00385869	NDUFB9, NDUFA13, NDUFB8, NDUFS5, NDUFB4, NDUFB3, NDUFS1	621	50	20472	4.61527	0.92354	0.021746	0.0171025
GOTERM_CC_DIRECT	GO:0016459~myosin complex	7	1.12721	0.00348301	MYO1D, MYO1B, MYO6, MYO18A, MYH9, MYO1F, MYO1G	621	49	20472	4.70945	0.901751	0.0203176	0.0159791
GOTERM_CC_DIRECT	GO:0005790~smooth endoplasmic reticulum	7	1.12721	0.000129463	MYO1D, APP, RPL10, CANX, ERP29, CALR, PPIB	621	27	20472	8.54679	0.0824959	0.00108978	0.000857076
GOTERM_CC_DIRECT	GO:0030863~cortical cytoskeleton	7	1.12721	3.71257e-05	EPB41, CAPZA2, MYH9, FLNA, SLC4A1, EZR, DBN1	621	22	20472	10.4892	0.0243867	0.000379824	0.000298719
GOTERM_CC_DIRECT	GO:0005905~clathrin-coated pit	6	0.966184	0.0371719	APP, TF, TFRC, MYO6, DNM1L, HSPD1	621	61	20472	3.24258	1	0.138097	0.108608
GOTERM_CC_DIRECT	GO:0101003~ficolin-1-rich granule membrane	6	0.966184	0.0371719	DIAPH1, LGALS3, LAMP1, COPB1, ITGB2, AP2A2	621	61	20472	3.24258	1	0.138097	0.108608
GOTERM_CC_DIRECT	GO:0005782~peroxisomal matrix	6	0.966184	0.0217789	SCP2, ACOX1, IDH1, CAT, HSD17B4, HSPD1	621	53	20472	3.73202	1	0.091088	0.0716376
GOTERM_CC_DIRECT	GO:0030134~ER to Golgi transport vesicle	6	0.966184	0.00845484	APP, SERPINA1, CTSZ, ERGIC1, TMED4, SEC31A	621	42	20472	4.70945	0.99647	0.0413417	0.0325138
GOTERM_CC_DIRECT	GO:0045334~clathrin-coated endocytic vesicle	6	0.966184	0.000972392	MYO6, CLTC, CLTB, CLTA, AP2A1, AP2A2	621	26	20472	7.60758	0.476362	0.0066664	0.0052429
GOTERM_CC_DIRECT	GO:0031258~lamellipodium membrane	6	0.966184	0.000430247	VASP, ITGB3, CFL1, ITGAV, CSPG4, FERMT2	621	22	20472	8.99078	0.248869	0.0032513	0.00255703
GOTERM_CC_DIRECT	GO:0005839~proteasome core complex	6	0.966184	0.000340901	PSMA5, PSMA6, PSMB2, PSMA2, PSMB1, PSMA7	621	21	20472	9.41891	0.20287	0.00263604	0.00207315
GOTERM_CC_DIRECT	GO:0071682~endocytic vesicle lumen	6	0.966184	0.000154763	HPX, SPARC, APOA1, CALR, APOE, HBA1	621	18	20472	10.9887	0.0978059	0.00125509	0.000987088
GOTERM_CC_DIRECT	GO:0031092~platelet alpha granule membrane	6	0.966184	0.000114619	SPARC, ITGB3, CD109, ITGA2B, PECAM1, CD9	621	17	20472	11.6351	0.0733933	0.000989892	0.000778517
GOTERM_CC_DIRECT	GO:0032993~protein-DNA complex	5	0.805153	0.0499801	PARP1, XRCC5, PRKDC, CTNNB1, TOP1	621	46	20472	3.58328	1	0.179658	0.141295
GOTERM_CC_DIRECT	GO:0030658~transport vesicle membrane	5	0.805153	0.0348519	RAB1A, TMEM30A, HLA-DRA, HLA-DRB3, HLA-DPA1	621	41	20472	4.02027	1	0.133283	0.104823
GOTERM_CC_DIRECT	GO:0043209~myelin sheath	5	0.805153	0.0207455	MYO1D, TUBA1A, GSN, DPYSL2, PLEC	621	35	20472	4.70945	0.999999	0.0888229	0.0698562
GOTERM_CC_DIRECT	GO:0034364~high-density lipoprotein particle	5	0.805153	0.0084036	APP, APOA2, HDLBP, APOA1, APOE	621	27	20472	6.10485	0.996346	0.0413417	0.0325138
GOTERM_CC_DIRECT	GO:0042613~MHC class II protein complex	5	0.805153	0.00733106	HLA-B, HLA-DRA, HLA-A, HLA-DRB3, HLA-DPA1	621	26	20472	6.33965	0.992502	0.0375012	0.0294934
GOTERM_CC_DIRECT	GO:0097038~perinuclear endoplasmic reticulum	5	0.805153	0.00144766	CYBB, ADAM10, CISD2, DBI, CYBA	621	17	20472	9.69594	0.618403	0.00934653	0.00735073
GOTERM_CC_DIRECT	GO:0031091~platelet alpha granule	5	0.805153	0.00144766	FGB, FGA, SPARC, MMRN1, FGG	621	17	20472	9.69594	0.618403	0.00934653	0.00735073
GOTERM_CC_DIRECT	GO:0022624~proteasome accessory complex	5	0.805153	0.00144766	PSMD11, PSMC6, PSMD13, PSMD5, PSMC1	621	17	20472	9.69594	0.618403	0.00934653	0.00735073
GOTERM_CC_DIRECT	GO:0030126~COPI vesicle coat	5	0.805153	0.000478934	COPB2, COPA, COPB1, COPG1, ARCN1	621	13	20472	12.6793	0.27281	0.00353879	0.00278314
GOTERM_CC_DIRECT	GO:0042582~azurophil granule	5	0.805153	0.000151257	HEXA, STX7, ANXA11, AZU1, MPO	621	10	20472	16.4831	0.0956995	0.00125509	0.000987088
GOTERM_CC_DIRECT	GO:0044291~cell-cell contact zone	4	0.644122	0.0348814	RAP2B, AHNAK, FLOT1, FLOT2	621	24	20472	5.49436	1	0.133283	0.104823
GOTERM_CC_DIRECT	GO:0030117~membrane coat	4	0.644122	0.0244977	COPB2, COPA, COPB1, AP2A2	621	21	20472	6.27927	1	0.0981383	0.0771824
GOTERM_CC_DIRECT	GO:0036020~endolysosome membrane	4	0.644122	0.0214705	CLTC, CLTA, AP2A1, AP2A2	621	20	20472	6.59324	0.999999	0.0903662	0.0710699
GOTERM_CC_DIRECT	GO:0031527~filopodium membrane	4	0.644122	0.0160695	VASP, ITGB3, ITGAV, UTRN	621	18	20472	7.32582	0.999979	0.070304	0.0552917
GOTERM_CC_DIRECT	GO:0005746~mitochondrial respiratory chain	4	0.644122	0.00958315	NDUFA13, UQCRB, UQCRC1, UQCRH	621	15	20472	8.79098	0.998344	0.0448788	0.0352957
GOTERM_CC_DIRECT	GO:0034399~nuclear periphery	4	0.644122	0.00958315	NUP93, NUP205, TPR, MNDA	621	15	20472	8.79098	0.998344	0.0448788	0.0352957
GOTERM_CC_DIRECT	GO:0005940~septin ring	4	0.644122	0.00784077	SEPTIN2, SEPTIN9, SEPTIN11, SEPTIN7	621	14	20472	9.41891	0.994671	0.0389113	0.0306024
GOTERM_CC_DIRECT	GO:0005750~mitochondrial respiratory chain complex III	4	0.644122	0.00784077	UQCRB, UQCRC1, UQCRC2, UQCRH	621	14	20472	9.41891	0.994671	0.0389113	0.0306024
GOTERM_CC_DIRECT	GO:0032153~cell division site	4	0.644122	0.00784077	SEPTIN2, SEPTIN9, SEPTIN11, SEPTIN7	621	14	20472	9.41891	0.994671	0.0389113	0.0306024
GOTERM_CC_DIRECT	GO:0031105~septin complex	4	0.644122	0.00784077	SEPTIN2, SEPTIN9, SEPTIN11, SEPTIN7	621	14	20472	9.41891	0.994671	0.0389113	0.0306024
GOTERM_CC_DIRECT	GO:0001931~uropod	4	0.644122	0.00495734	FLOT1, MYH9, FLOT2, EZR	621	12	20472	10.9887	0.963294	0.0272449	0.0214272
GOTERM_CC_DIRECT	GO:0099738~cell cortex region	4	0.644122	0.00380292	EPB41, EPB41L2, CTSZ, ENO1	621	11	20472	11.9877	0.92064	0.0216149	0.0169994
GOTERM_CC_DIRECT	GO:0019773~proteasome core complex, alpha-subunit complex	4	0.644122	0.00380292	PSMA5, PSMA6, PSMA2, PSMA7	621	11	20472	11.9877	0.92064	0.0216149	0.0169994
GOTERM_CC_DIRECT	GO:0005885~Arp2/3 protein complex	4	0.644122	0.00380292	ACTR3, ACTR2, ARPC1B, ARPC5	621	11	20472	11.9877	0.92064	0.0216149	0.0169994
GOTERM_CC_DIRECT	GO:0016600~flotillin complex	4	0.644122	0.0020257	FLOT1, CTNNA1, CTNNB1, FLOT2	621	9	20472	14.6516	0.74036	0.0124731	0.00980965
GOTERM_CC_DIRECT	GO:0008091~spectrin	4	0.644122	0.0020257	SPTA1, PRKCB, EPB41L2, SPTB	621	9	20472	14.6516	0.74036	0.0124731	0.00980965
GOTERM_CC_DIRECT	GO:0014731~spectrin-associated cytoskeleton	4	0.644122	0.00138146	SPTA1, EPB41, SPTB, ANK1	621	8	20472	16.4831	0.601205	0.00918672	0.00722504
GOTERM_CC_DIRECT	GO:0030130~clathrin coat of trans-Golgi network vesicle	4	0.644122	0.000883261	CLTC, CLTB, CLTA, AP2A1	621	7	20472	18.8378	0.444356	0.00618282	0.00486258
GOTERM_CC_DIRECT	GO:0017101~aminoacyl-tRNA synthetase multienzyme complex	3	0.483092	0.049437	RARS1, EPRS1, IARS1	621	12	20472	8.24155	1	0.179648	0.141287
GOTERM_CC_DIRECT	GO:0005614~interstitial matrix	3	0.483092	0.049437	COL14A1, TNC, VWA1	621	12	20472	8.24155	1	0.179648	0.141287
GOTERM_CC_DIRECT	GO:0005641~nuclear envelope lumen	3	0.483092	0.0350745	APP, ALOX5, TUBB	621	10	20472	9.88986	1	0.133283	0.104823
GOTERM_CC_DIRECT	GO:0030061~mitochondrial crista	3	0.483092	0.0350745	LYN, OPA1, HSPD1	621	10	20472	9.88986	1	0.133283	0.104823
GOTERM_CC_DIRECT	GO:0042824~MHC class I peptide loading complex	3	0.483092	0.0286254	HLA-A, CALR, TAPBP	621	9	20472	10.9887	1	0.111976	0.0880652
GOTERM_CC_DIRECT	GO:0031095~platelet dense tubular network membrane	3	0.483092	0.0286254	EHD1, ATP2A3, ATP2A2	621	9	20472	10.9887	1	0.111976	0.0880652
GOTERM_CC_DIRECT	GO:0008290~F-actin capping protein complex	3	0.483092	0.0227144	CAPZA1, CAPZA2, ADD2	621	8	20472	12.3623	1	0.0921039	0.0724366
GOTERM_CC_DIRECT	GO:0005577~fibrinogen complex	3	0.483092	0.0227144	FGB, FGA, FGG	621	8	20472	12.3623	1	0.0921039	0.0724366
GOTERM_CC_DIRECT	GO:0030132~clathrin coat of coated pit	3	0.483092	0.0227144	CLTC, CLTB, CLTA	621	8	20472	12.3623	1	0.0921039	0.0724366
GOTERM_CC_DIRECT	GO:0034366~spherical high-density lipoprotein particle	3	0.483092	0.0227144	APOA2, APOA1, HPR	621	8	20472	12.3623	1	0.0921039	0.0724366
GOTERM_CC_DIRECT	GO:0072669~tRNA-splicing ligase complex	3	0.483092	0.0227144	DDX1, RTCB, FAM98B	621	8	20472	12.3623	1	0.0921039	0.0724366
GOTERM_CC_DIRECT	GO:0030118~clathrin coat	3	0.483092	0.0126675	CLTC, CLTB, CLTA	621	6	20472	16.4831	0.999792	0.0569179	0.044764
GOTERM_CC_DIRECT	GO:0034363~intermediate-density lipoprotein particle	3	0.483092	0.0126675	APP, APOA1, APOE	621	6	20472	16.4831	0.999792	0.0569179	0.044764
GOTERM_CC_DIRECT	GO:0005784~Sec61 translocon complex	3	0.483092	0.0126675	SEC61A1, ARL6IP1, SSR4	621	6	20472	16.4831	0.999792	0.0569179	0.044764
GOTERM_CC_DIRECT	GO:0005592~collagen type XI trimer	3	0.483092	0.00861708	COL2A1, COL5A1, COL5A2	621	5	20472	19.7797	0.996834	0.0415243	0.0326575
GOTERM_CC_DIRECT	GO:0098835~presynaptic endocytic zone membrane	3	0.483092	0.00861708	CLTB, CLTA, DNM1L	621	5	20472	19.7797	0.996834	0.0415243	0.0326575
GOTERM_CC_DIRECT	GO:0030478~actin cap	3	0.483092	0.0052759	ACTR2, GSN, CALD1	621	4	20472	24.7246	0.970334	0.0280678	0.0220744
GOTERM_CC_DIRECT	GO:0005853~eukaryotic translation elongation factor 1 complex	3	0.483092	0.0052759	EEF1A1, EEF1B2, EEF1D	621	4	20472	24.7246	0.970334	0.0280678	0.0220744
GOTERM_CC_DIRECT	GO:0097452~GAIT complex	3	0.483092	0.0052759	SYNCRIP, EPRS1, GAPDH	621	4	20472	24.7246	0.970334	0.0280678	0.0220744
GOTERM_CC_DIRECT	GO:0005589~collagen type VI trimer	3	0.483092	0.00269199	COL6A1, COL6A3, DCN	621	3	20472	32.9662	0.833472	0.0161833	0.0127276

## Sheet: B-A(MF)
Category	Term	Count	%	PValue	Genes	List Total	Pop Hits	Pop Total	Fold Enrichment	Bonferroni	Benjamini	FDR
GOTERM_MF_DIRECT	GO:0005515~protein binding	518	83.4138	2.32225e-24	RPL5, RPL30, RNH1, RPL3, TFRC, HNRNPU, SLC4A1, C4BPA, HNRNPR, C4BPB, ENO1, RPL8, RPL9, MYLK, RPL7, TFG, SCP2, PSMD5, DPYSL2, DPYSL3, STMN1, RPL38, VPS35, PRKACA, PRKCB, SERPINF1, RPL23, SND1, NUP93, UQCRC1, RPL24, SERPING1, UQCRC2, RPL28, NUP205, RPN2, PRKDC, CFI, IQGAP1, THY1, CFP, GNS, C2, C3, HPX, PRDX2, LDHB, NCSTN, LDHA, C9, PRDX1, EPB41L2, MYO6, S100A13, SERPINH1, HMOX1, ELANE, LYN, ERLIN1,…	613	12539	18811	1.26771	2.08538e-21	6.95126e-22	6.41715e-22
GOTERM_MF_DIRECT	GO:0003723~RNA binding	162	26.087	2.4652e-45	RPL5, RPL30, RPL3, TFRC, RTCB, HDLBP, CISD2, HNRNPU, PEBP1, C4BPA, HNRNPR, ENO1, SRP14, RPL8, RPL9, RPL7, PNN, RPS14, LGALS3, RPS17, LGALS1, RPS19, TRIM28, RPL18A, MAGOH, RPL35, RPL38, RPS11, RPS10, SEC63, RPS8, RPS5, RPL23, RPS6, ANXA11, RPSA, HLA-A, ILF2, SND1, EEF1A1, ILF3, HNRNPUL2, NCL, SUB1, FSCN1, RPL24, TFAM, S100A4, KCTD12, EZR, PFN1, PPIB, SNRNP200, RPL28, PPIA, FKBP3, KPNB1, LRRC59, PR…	613	1470	18811	3.38181	2.21375e-42	2.21375e-42	2.04365e-42
GOTERM_MF_DIRECT	GO:0042802~identical protein binding	117	18.8406	1.19158e-14	APP, PLVAP, TFRC, ARL6IP1, ITGA2B, HNRNPU, PARK7, RPL7, LGALS1, RPS19, TFG, DPYSL2, KIF5B, DPYSL3, LONP1, BANF1, TGM2, G6PD, ACTN2, ATAD3A, STIM1, NCL, SUB1, S100A4, VDAC1, KCTD12, EZR, SNRNP200, ALDH7A1, FBLN1, CORO1A, ADH5, ACAT1, LDHB, LDHA, PRDX1, MYO6, ESD, PACSIN2, HMOX1, APOE, A2M, DECR1, CBX3, FUS, IDH1, NONO, LYZ, PRDX6, BST2, EHD1, GLUD1, EPRS1, P4HA1, TGFBI, FBN1, YWHAE, SERPINA1, YWHA…	613	1712	18811	2.09717	1.06677e-11	1.52862e-12	1.41117e-12
GOTERM_MF_DIRECT	GO:0045296~cadherin binding	67	10.789	1.32056e-34	ITGB1, YWHAE, YWHAB, CTNND1, ARHGAP1, HDLBP, PARK7, ENO1, H1-10, GOLGA3, LASP1, KIF5B, BSG, RACK1, CLIC1, RARS1, YWHAZ, SND1, EEF1G, PKM, EEF1D, FSCN1, RPL24, MYH9, PLIN3, ITGA6, TAGLN2, EZR, PFN1, ALDOA, DBN1, PLEC, LRRC59, RAB1A, AHNAK, USO1, SLC3A2, IQGAP1, NDRG1, CNN2, LDHA, CALD1, PRDX1, PCBP1, RPL14, CTNNA1, PACSIN2, FLNA, FLNB, RPS2, RPL15, VASP, HSPA8, SEPTIN2, IDH1, RPL23A, EEF2, SEPTIN9…	613	316	18811	6.50638	1.18586e-31	5.9293e-32	5.47371e-32
GOTERM_MF_DIRECT	GO:0005509~calcium ion binding	48	7.72947	1.52494e-05	FKBP10, SPARC, PROS1, DYSF, ATP2A2, FBLN1, IQGAP1, ITIH1, LTBP1, SPTA1, PPP3CA, ACAN, CRTAC1, STAB1, S100A13, PLS3, ENPP1, CHP1, ME2, HABP2, TGM2, AOC3, GSN, GCA, F10, ACTN2, ACTN1, F12, ANXA11, ASPN, LETM1, RCN3, EHD1, VCAN, PROC, STIM1, MMRN1, GPD2, CANX, CALU, ALPL, S100A4, FKBP9, CALR, S100A9, TPT1, FBN1, SLC25A13	613	752	18811	1.95873	0.0136008	0.000595392	0.000549643
GOTERM_MF_DIRECT	GO:0042803~protein homodimerization activity	47	7.56844	8.15171e-06	SCARB2, APP, CAMK2D, FECH, TFRC, TIMM9, CPOX, HSD17B4, CISD2, HSPB1, SLC4A1, ENO1, PARK7, TXN, ELAVL1, CORO1A, ADD2, EEA1, TPR, S100A13, RACK1, FLNA, HMOX1, ENPP1, BANF1, APOE, DNM1L, G6PD, TPI1, GCA, ACTN1, IDH1, APOA2, DEFA3, APOA1, ADAM10, PML, BST2, NUDT21, SARS1, EPRS1, ACOX1, CAT, ERP29, PECAM1, MYH9, SSBP1	613	713	18811	2.02283	0.00729354	0.000385276	0.000355672
GOTERM_MF_DIRECT	GO:0003779~actin binding	46	7.40741	9.50954e-16	ITGB1, EPB41, ARPC1B, HNRNPU, LSP1, IQGAP2, CORO1A, MYLK, CNN3, ADD2, CNN2, LASP1, CALD1, EPB41L2, MYO6, CFL1, FLNB, GC, PDLIM5, VASP, ACTR3, CAP1, ACTR2, GSN, ACTN2, ACTN1, DSTN, ARPC5, SPTB, MYO1D, DIAPH1, MYO1B, CAPZA1, CAPZA2, FSCN1, MYH9, S100A4, EZR, PFN1, ALDOA, UTRN, DBN1, FERMT2, MYO1F, MYO1G, PLEC	613	339	18811	4.16399	8.97282e-13	2.13489e-13	1.97085e-13
GOTERM_MF_DIRECT	GO:0019899~enzyme binding	38	6.11916	6.17292e-09	YWHAE, SCARB2, APP, ECM1, PRKDC, YWHAB, ITGB3, ATP2A2, PEBP1, PARK7, HSPD1, ACAT1, PPP3CA, LAMP1, PCBP2, RACK1, RPS3, HMOX1, BANF1, APOE, RPS2, A2M, LYN, HSPA8, CYB5A, UBE2I, PARP1, CBX3, APOA2, NME2, APOA1, SOD2, ANK1, SARS1, CAT, CTNNB1, PRTN3, KPNB1	613	390	18811	2.98999	5.54327e-06	3.95949e-07	3.65525e-07
GOTERM_MF_DIRECT	GO:0019901~protein kinase binding	37	5.95813	1.23929e-05	DCTN2, TFRC, GSTP1, CTNND1, ITGB2, CLTC, PEBP1, HSPB1, AP2A1, ATP1A1, THY1, IQGAP1, ELAVL1, AP2A2, ADD2, CDC42, PPP1CB, RPS19, DPYSL2, RPS3, PRKACA, HNRNPA0, PARP1, PGAM1, RPS6, RHOG, ADAM10, EEF2, YWHAZ, EEF1A1, PTPRC, TBL2, CTNNB1, VDAC1, CSPG4, UTRN, FERMT2	613	510	18811	2.2263	0.0110672	0.000529945	0.000489225
GOTERM_MF_DIRECT	GO:0051015~actin filament binding	37	5.95813	2.13012e-15	TAGLN, WDR1, ARPC1B, IQGAP1, IQGAP2, CORO1A, ADD2, SPTA1, LASP1, MYO6, CFL1, MYO18A, CTNNA1, FLNA, PLS3, FLNB, ACTR3, ACTR2, GSN, ACTN2, ACTN1, DSTN, ARPC5, EEF2, SPTB, MYO1D, MYO1B, CAPZA1, CAPZA2, FSCN1, MYH9, EZR, UTRN, DBN1, FERMT2, MYO1F, MYO1G	613	225	18811	5.04627	1.89426e-12	3.4995e-13	3.2306e-13
GOTERM_MF_DIRECT	GO:0003735~structural constituent of ribosome	34	5.47504	2.33819e-15	RPL5, RPL30, RPL3, RPL10, RPL8, RPL9, RPL7, RPS4X, RPS14, RPS17, RPS19, RPL18A, RPL36AL, RPL14, RPS3, RPL35, RPL38, RPS2, RPL15, RPS11, RPL17, RPS10, RPS8, RPL23, RPS5, RPS6, RPL23A, RPSA, RPS3A, RPS26, RPL27A, RPL24, RPL28, RPS23	613	189	18811	5.52037	2.09366e-12	3.4995e-13	3.2306e-13
GOTERM_MF_DIRECT	GO:0005525~GTP binding	32	5.15298	7.55511e-06	RAB1A, ARF4, ARF1, RAB5C, RTCB, SAMHD1, SEPTIN11, RAP1B, CDC42, TUBA1B, RAP1A, TUBA1A, OPA1, DNM1L, RAB6B, TGM2, RAB8B, PCK2, SEPTIN2, TUBB, RHOG, TUBB4B, EEF2, SEPTIN9, SEPTIN7, EHD1, EEF1A1, GLUD1, TUBB2B, RAP2B, RAN, RAB7A	613	399	18811	2.4611	0.00676155	0.000376916	0.000347955
GOTERM_MF_DIRECT	GO:0044877~macromolecular complex binding	31	4.99195	3.93887e-05	ITGB1, YWHAE, TFRC, YWHAB, ARPC1B, ITGB2, HNRNPU, CLTA, FBLN1, AP2A1, PARK7, IQGAP1, HSPD1, RAP1B, PPP3CA, RAP1A, OPA1, KIF5B, RPS3, APOE, DNM1L, XRCC5, TUBB, APEX1, GNB2, UQCRC1, ITGA6, VDAC1, UQCRC2, ATP6V0D1, FBN1	613	414	18811	2.2978	0.0347535	0.00131004	0.00120938
GOTERM_MF_DIRECT	GO:0019904~protein domain specific binding	31	4.99195	2.56735e-09	YWHAE, ARF1, PRKDC, YWHAB, ATP1A1, IQGAP1, MECP2, XPO1, TUBA1A, LAMP1, YWHAQ, BASP1, HNRNPA1, PRKACA, YWHAG, TGM2, SKP1, CBX3, ACTN2, ACTN1, TUBB, M6PR, YWHAZ, MYO1D, RAP2B, VAPA, MYH9, TOP1, EZR, RBMX, KPNB1	613	263	18811	3.61707	2.30548e-06	1.77345e-07	1.63718e-07
GOTERM_MF_DIRECT	GO:0005102~receptor binding	28	4.50886	0.000254529	FCN1, APP, STOML2, CTNND1, ICAM3, PARK7, KNG1, C3, SCP2, RACK1, APOE, A2M, RAB8B, FGB, LYN, FGA, ITGA1, FGG, APOA2, HLA-B, APOA1, ADAM10, CNPY3, HLA-A, DIAPH1, PTPRC, DNAJB11, PRTN3	613	396	18811	2.16977	0.20435	0.00634908	0.00586124
GOTERM_MF_DIRECT	GO:0005178~integrin binding	28	4.50886	2.27485e-12	ITGB1, APP, CD151, ITGAM, ITGB3, ITGA2B, ITGB2, ICAM3, FBLN1, THY1, ICAM1, ITGAV, LYN, ACTN2, ACTN1, ITGA1, ADAM10, COL5A1, MYH9, CD9, ITGA6, TGFBI, CALR, UTRN, PPIA, FERMT2, FBN1, FERMT3	613	161	18811	5.33683	2.04281e-09	2.26979e-10	2.09539e-10
GOTERM_MF_DIRECT	GO:0005201~extracellular matrix structural constituent	28	4.50886	4.7253e-14	SRPX, ECM1, TINAGL1, SPARC, COL14A1, TNC, DPT, FBLN1, PRELP, AEBP1, LTBP1, ACAN, FGB, FGA, LUM, FGG, BGN, PCOLCE, MFAP5, COL2A1, MMRN1, COL4A2, COL5A1, COL4A1, COL5A2, VWA1, TGFBI, FBN1	613	138	18811	6.2263	4.24714e-11	5.30415e-12	4.89659e-12
GOTERM_MF_DIRECT	GO:0003924~GTPase activity	27	4.34783	8.98187e-05	RAB1A, ARF4, ARF1, RAB5C, SEPTIN11, RAP1B, CDC42, RAP1A, TUBA1A, OPA1, ARHGDIB, DNM1L, RAB6B, TGM2, RAB8B, SEPTIN2, TUBB, RHOG, EEF2, SEPTIN9, SEPTIN7, EEF1A1, TUBB2B, RAP2B, GNB2, RAN, RAB7A	613	351	18811	2.36052	0.0774935	0.00260185	0.00240193
GOTERM_MF_DIRECT	GO:0003729~mRNA binding	26	4.1868	4.36767e-07	HDLBP, HNRNPR, PARK7, ELAVL1, RPL7, MECP2, PTBP1, SYNCRIP, PCBP1, TPR, PCBP2, RPS3, RPL35, RPS2, HNRNPA0, HNRNPA3, SSB, RPS5, RPS26, HNRNPL, NUDT21, PKM, RPL24, SLIRP, CALR, RBMX	613	244	18811	3.2699	0.00039214	2.61478e-05	2.41387e-05
GOTERM_MF_DIRECT	GO:0005198~structural molecule activity	26	4.1868	2.13636e-09	COPB2, COPA, PSMD11, PSMD13, EPB41, COPB1, CLTC, CLTB, CLTA, PNN, TUBA1B, TUBA1A, EPB41L2, CTNNA1, HMOX1, APOE, SEC31A, FGB, FGA, SEC13, TUBB, FGG, ANK1, SEPTIN7, COPG1, PLEC	613	187	18811	4.26661	1.91845e-06	1.59871e-07	1.47587e-07
GOTERM_MF_DIRECT	GO:0031625~ubiquitin protein ligase binding	23	3.7037	0.000440645	LYN, YWHAE, GPI, RPL5, HSPA8, TPI1, XRCC5, RPL23, TUBB, ERLIN1, YWHAZ, PRDX6, PML, HSPD1, TUBA1B, TRIM28, PCBP2, UBE2N, UQCRC1, CALR, SLC25A5, DNM1L, PRKACA	613	305	18811	2.31409	0.32685	0.0101461	0.00936654
GOTERM_MF_DIRECT	GO:0005516~calmodulin binding	19	3.05958	0.00013536	CAMK2D, EPB41, AEBP1, IQGAP1, IQGAP2, CNN3, ADD2, MYLK, MYO1D, CNN2, EEA1, EEF1A1, PPP3CA, MYO1B, CALD1, MYO6, MYH9, MYO1F, MYO1G	613	205	18811	2.84414	0.114463	0.00379853	0.00350666
GOTERM_MF_DIRECT	GO:0005518~collagen binding	19	3.05958	3.64378e-12	LRRC15, CRTAP, SPARC, COL14A1, LUM, ITGA1, P3H1, PCOLCE, AEBP1, MMP9, DCN, ASPN, MRC2, CTSK, COL6A2, COL6A1, SERPINH1, TGFBI, PPIB	613	68	18811	8.57425	3.27209e-09	3.27211e-10	3.02069e-10
GOTERM_MF_DIRECT	GO:0016491~oxidoreductase activity	17	2.73752	0.00569761	ERO1A, VAT1, HSDL2, SQOR, CYBB, HSD17B4, ETFA, CP, HSD17B10, ADH5, PDIA5, PRDX2, DHRS7, APEX1, PRDX1, PHGDH, DECR1	613	241	18811	2.16463	0.99409	0.0811195	0.0748865
GOTERM_MF_DIRECT	GO:0008201~heparin binding	17	2.73752	0.000211165	APP, SERPINC1, SERPINA10, PRELP, PCOLCE, AZU1, MPO, KNG1, PTPRC, COL5A1, CTSG, APOE, ELANE, PF4, FBN1, PAFAH1B1, LTF	613	176	18811	2.96406	0.172748	0.00541789	0.00500159
GOTERM_MF_DIRECT	GO:0004252~serine-type endopeptidase activity	16	2.57649	0.00175023	F10, F12, CFI, HPR, AZU1, MMP9, C2, PROC, CTSK, LONP1, CTSG, PRTN3, KLKB1, ELANE, HABP2, LTF	613	194	18811	2.53087	0.792596	0.0327439	0.030228
GOTERM_MF_DIRECT	GO:0044325~ion channel binding	15	2.41546	0.000192959	LYN, YWHAE, CAMK2D, ACTN2, ACTN1, ATP2A3, ATP2A2, YWHAZ, ANK1, FKBP1A, DIAPH1, YWHAQ, FLNA, CTNNB1, VDAC1	613	140	18811	3.28787	0.15911	0.00509639	0.0047048
GOTERM_MF_DIRECT	GO:0005200~structural constituent of cytoskeleton	15	2.41546	9.62183e-06	ACTR3, ACTR2, EPB41, ARPC1B, TUBB, ARPC5, TUBB4B, SPTB, ANK1, ADD2, SPTA1, TUBA1B, TUBB2B, TUBA1A, PLEC	613	107	18811	4.30189	0.00860323	0.00043202	0.000398825
GOTERM_MF_DIRECT	GO:0004867~serine-type endopeptidase inhibitor activity	15	2.41546	6.13372e-06	SERPINA3, APP, SERPINA1, SERPINC1, SERPINF1, SERPINA10, PEBP1, ITIH1, SERPINA4, AGT, CD109, SERPINH1, SERPING1, COL6A3, A2M	613	103	18811	4.46895	0.00549296	0.000324005	0.000299109
GOTERM_MF_DIRECT	GO:0008022~protein C-terminus binding	14	2.25443	0.0188952	ECM1, XRCC5, YWHAB, EPB41, ATP2A2, AP2A1, FBLN1, CORO1A, STIP1, YWHAQ, NCL, CTNNB1, BANF1, EZR	613	208	18811	2.06546	1	0.195033	0.180048
GOTERM_MF_DIRECT	GO:0051087~chaperone binding	14	2.25443	5.92317e-05	FGB, SCARB2, HSPA8, APP, GRN, TFRC, TIMM9, HLA-B, ATP1A1, CP, HSPD1, STIP1, ERP29, CALR	613	110	18811	3.90559	0.0518017	0.00189965	0.00175368
GOTERM_MF_DIRECT	GO:0002020~protease binding	12	1.93237	0.000847205	ITGB1, CSTB, ECM1, SERPINA1, STIM1, SERPINC1, ITGB3, FLOT1, FLOT2, ITGAV, A2M, ELANE	613	109	18811	3.37836	0.532853	0.0187465	0.017306
GOTERM_MF_DIRECT	GO:0001618~virus receptor activity	12	1.93237	3.31943e-05	SCARB2, ITGB1, LAMP1, TFRC, ANPEP, ITGB3, BSG, RPSA, ITGAV, NCAM1, SLC1A5, ICAM1	613	76	18811	4.84528	0.0293691	0.00119234	0.00110072
GOTERM_MF_DIRECT	GO:0003725~double-stranded RNA binding	12	1.93237	2.9236e-05	TUBA1B, ILF3, TFRC, DDX1, ACTN1, CLTC, HNRNPU, SLC3A2, TUBB4B, ILF2, ELAVL1, HSPD1	613	75	18811	4.90989	0.0259127	0.00109392	0.00100986
GOTERM_MF_DIRECT	GO:0051082~unfolded protein binding	11	1.77134	0.0105641	HSPA8, CANX, DNAJB11, SERPINH1, HSPB1, CALR, PPIB, TUBB4B, PPIA, HSPD1, TAPBP	613	131	18811	2.57675	0.999928	0.117118	0.108119
GOTERM_MF_DIRECT	GO:0003697~single-stranded DNA binding	11	1.77134	0.00431528	IGHM, PCBP1, SUB1, PCBP2, LONP1, HNRNPU, SSBP1, TOP1, SAMHD1, HNRNPA1, HSPD1	613	115	18811	2.93526	0.979421	0.0668124	0.0616787
GOTERM_MF_DIRECT	GO:0019900~kinase binding	11	1.77134	0.0017923	EEF1A1, LDHB, LDHA, PFKL, OPA1, SLC2A1, RPS3, CTNNB1, FLNA, CHP1, PARK7	613	102	18811	3.30936	0.800299	0.0328467	0.0303229
GOTERM_MF_DIRECT	GO:0004175~endopeptidase activity	10	1.61031	0.00206726	PSMA5, PSMA6, PSMB2, PSMA2, ERAP1, PSMB1, ADAM10, MMP9, ELANE, PSMA7	613	87	18811	3.52722	0.844065	0.0371279	0.0342751
GOTERM_MF_DIRECT	GO:0009055~electron carrier activity	10	1.61031	0.000426673	CYB5A, AKR1A1, CYBB, PHGDH, ETFA, CYBA, NDUFS1, ME2, SDHB, ADH5	613	70	18811	4.38383	0.318347	0.010083	0.00930821
GOTERM_MF_DIRECT	GO:0005080~protein kinase C binding	10	1.61031	8.58492e-05	HINT1, CAVIN2, PRKCB, ITGB3, RACK1, HSPB1, FLNA, ITGAV, PDLIM5, YWHAG	613	57	18811	5.38365	0.0741989	0.00260185	0.00240193
GOTERM_MF_DIRECT	GO:0030020~extracellular matrix structural constituent conferring tensile strength	10	1.61031	5.31354e-06	COL2A1, COL4A2, COL5A1, COL4A1, COL14A1, COL6A2, COL12A1, COL5A2, COL6A1, COL6A3	613	41	18811	7.48458	0.00476021	0.000298222	0.000275308
GOTERM_MF_DIRECT	GO:0030021~extracellular matrix structural constituent conferring compression resistance	10	1.61031	3.59482e-10	ACAN, VCAN, LUM, OGN, BGN, PRELP, PRG3, FMOD, DCN, ASPN	613	16	18811	19.1792	3.22814e-07	2.93468e-08	2.70918e-08
GOTERM_MF_DIRECT	GO:0003690~double-stranded DNA binding	9	1.44928	0.0372737	XRCC5, PRKDC, SUB1, HNRNPU, MNDA, BANF1, TOP1, H1-0, H1-10	613	117	18811	2.36052	1	0.328155	0.30294
GOTERM_MF_DIRECT	GO:0008233~peptidase activity	9	1.44928	0.0284846	APP, CTSG, LAP3, PARK7, AZU1, MMP9, HABP2, ELANE, TGM2	613	111	18811	2.48812	1	0.263703	0.243441
GOTERM_MF_DIRECT	GO:0019003~GDP binding	9	1.44928	0.00350993	RAP1B, ARF1, RAP1A, RAB5C, RAP2B, NME2, RAN, RAB8B, RAB7A	613	77	18811	3.58677	0.957466	0.0574721	0.0530561
GOTERM_MF_DIRECT	GO:0004866~endopeptidase inhibitor activity	9	1.44928	8.92015e-05	C4B, C3, CSTB, AHSG, PROS1, CD109, SPP2, A2M, KNG1	613	45	18811	6.13736	0.076982	0.00260185	0.00240193
GOTERM_MF_DIRECT	GO:0051287~NAD binding	9	1.44928	3.67209e-05	LDHB, LDHA, AHCY, MDH1, PARP1, IDH1, PHGDH, ME2, GAPDH	613	40	18811	6.90453	0.0324382	0.00126828	0.00117083
GOTERM_MF_DIRECT	GO:0048306~calcium-dependent protein binding	8	1.28824	0.0303475	MYO1D, S100A13, ANXA11, CHP1, S100A4, A2M, S100A9, SEC31A	613	92	18811	2.66842	1	0.278082	0.256715
GOTERM_MF_DIRECT	GO:0060090~binding, bridging	8	1.28824	0.021929	CHCHD3, SEPTIN2, RACK1, IQGAP1, SEPTIN9, SEPTIN11, SEPTIN7, EIF3B	613	86	18811	2.85458	1	0.221261	0.20426
GOTERM_MF_DIRECT	GO:0043022~ribosome binding	8	1.28824	0.00820032	LETM1, SEC61A1, RPN2, RACK1, RPSA, EEF2, EIF3C, EIF2S1	613	71	18811	3.45767	0.999385	0.100875	0.0931242
GOTERM_MF_DIRECT	GO:0050839~cell adhesion molecule binding	8	1.28824	0.0075991	FGB, ITGB1, FGA, ITGB3, ITGB2, FGG, TGFBI, EZR	613	70	18811	3.50706	0.998941	0.0961125	0.0887275
GOTERM_MF_DIRECT	GO:0031072~heat shock protein binding	8	1.28824	0.00649513	HSPA8, ITGAM, EEF1D, TPR, ITGB2, APOA2, TFAM, APOA1	613	68	18811	3.61021	0.997125	0.085774	0.0791833
GOTERM_MF_DIRECT	GO:0008092~cytoskeletal protein binding	8	1.28824	0.00323101	EPB41, ACTN2, EPB41L2, PACSIN2, ALDOC, ALDOA, CORO1A, TOR1AIP1	613	60	18811	4.09157	0.945314	0.055797	0.0515097
GOTERM_MF_DIRECT	GO:0043236~laminin binding	8	1.28824	1.42983e-05	ITGB1, LGALS3, LRRC15, ECM1, TINAGL1, LGALS1, RPSA, ITGA6	613	26	18811	9.44209	0.0127579	0.00058363	0.000538786
GOTERM_MF_DIRECT	GO:0000049~tRNA binding	7	1.12721	0.0351855	EEF1A1, AARS1, SARS1, SSB, RARS1, IARS1, HSD17B10	613	75	18811	2.8641	1	0.312838	0.2888
GOTERM_MF_DIRECT	GO:0042277~peptide binding	7	1.12721	0.0230711	NPEPPS, ENPEP, ANPEP, ERAP1, CLTB, CLTA, CALR	613	68	18811	3.15893	1	0.227668	0.210175
GOTERM_MF_DIRECT	GO:0003774~motor activity	7	1.12721	0.00444589	MYO1D, MYO1B, MYO6, MYO18A, MYH9, MYO1F, MYO1G	613	48	18811	4.47516	0.981708	0.0673603	0.0621845
GOTERM_MF_DIRECT	GO:0003755~peptidyl-prolyl cis-trans isomerase activity	7	1.12721	0.00358401	FKBP11, FKBP1A, FKBP10, FKBP9, PPIB, PPIA, FKBP3	613	46	18811	4.66973	0.960213	0.0574721	0.0530561
GOTERM_MF_DIRECT	GO:0008137~NADH dehydrogenase (ubiquinone) activity	7	1.12721	0.00253217	NDUFB9, NDUFA13, NDUFB8, NDUFS5, NDUFB4, NDUFB3, NDUFS1	613	43	18811	4.99552	0.897385	0.044586	0.0411601
GOTERM_MF_DIRECT	GO:0043531~ADP binding	7	1.12721	0.0013152	GLUD1, MYO6, LONP1, MYO18A, PGK1, MYH9, ATP1A1	613	38	18811	5.65283	0.693283	0.0262456	0.024229
GOTERM_MF_DIRECT	GO:0051020~GTPase binding	7	1.12721	0.0011384	STOML2, EPRS1, GNB2, CLTA, FLNA, IARS1, ENO1	613	37	18811	5.80561	0.640438	0.0232338	0.0214485
GOTERM_MF_DIRECT	GO:0000146~microfilament motor activity	7	1.12721	0.0011384	MYO1D, MYO1B, ACTC1, MYO6, MYH9, MYO1F, MYO1G	613	37	18811	5.80561	0.640438	0.0232338	0.0214485
GOTERM_MF_DIRECT	GO:0050840~extracellular matrix binding	7	1.12721	0.000425347	SPARC, ITGB3, ITGA2B, BGN, ITGAV, TGFBI, DCN	613	31	18811	6.92927	0.317534	0.010083	0.00930821
GOTERM_MF_DIRECT	GO:0023026~MHC class II protein complex binding	7	1.12721	0.000190994	YWHAE, HSPA8, PKM, HLA-DRA, ANXA11, HLA-DRB3, HLA-DPA1	613	27	18811	7.95583	0.157624	0.00509639	0.0047048
GOTERM_MF_DIRECT	GO:0015485~cholesterol binding	6	0.966184	0.0265247	SCARB2, SCP2, APOA2, ERLIN1, APOA1, VDAC1	613	52	18811	3.54078	1	0.248116	0.229052
GOTERM_MF_DIRECT	GO:0046332~SMAD binding	6	0.966184	0.0246102	FKBP1A, COL5A2, CTNNB1, FLNA, FERMT2, PML	613	51	18811	3.61021	1	0.240217	0.221759
GOTERM_MF_DIRECT	GO:0019843~rRNA binding	6	0.966184	0.0102157	RPS4X, RPS5, RPL23A, RPL8, RPS11, RPL9	613	41	18811	4.49075	0.999901	0.114671	0.10586
GOTERM_MF_DIRECT	GO:0051219~phosphoprotein binding	6	0.966184	0.00740843	LYN, YWHAE, TBL2, EPB41, YWHAB, PAFAH1B1	613	38	18811	4.84528	0.998741	0.0950396	0.087737
GOTERM_MF_DIRECT	GO:0042605~peptide antigen binding	6	0.966184	0.00660669	HLA-B, HLA-DRA, HLA-A, HLA-DRB3, HLA-DPA1, TAPBP	613	37	18811	4.97624	0.997401	0.0859827	0.079376
GOTERM_MF_DIRECT	GO:0004601~peroxidase activity	6	0.966184	0.00586773	PRDX2, GPX3, PRDX1, HBA1, EPX, MPO	613	36	18811	5.11446	0.994932	0.0811195	0.0748865
GOTERM_MF_DIRECT	GO:0001968~fibronectin binding	6	0.966184	0.00348662	ITGB1, LRRC15, CTSK, ITGB3, FBLN1, ITGAV	613	32	18811	5.75377	0.956563	0.0574721	0.0530561
GOTERM_MF_DIRECT	GO:0030507~spectrin binding	6	0.966184	0.00159768	PTPRC, DCTN2, EPB41, EPB41L2, ANK1, ADD2	613	27	18811	6.81929	0.762089	0.0311894	0.0287929
GOTERM_MF_DIRECT	GO:0050750~low-density lipoprotein particle receptor binding	6	0.966184	0.0011094	APP, LANCL1, CLTC, AP2A1, APOE, MESD	613	25	18811	7.36483	0.630939	0.0232338	0.0214485
GOTERM_MF_DIRECT	GO:0005547~phosphatidylinositol-3,4,5-trisphosphate binding	5	0.805153	0.0402454	MYO1B, IQGAP1, IQGAP2, FERMT2, MYO1G	613	40	18811	3.83585	1	0.340947	0.314749
GOTERM_MF_DIRECT	GO:0016616~oxidoreductase activity, acting on the CH-OH group of donors, NAD or NADP as acceptor	5	0.805153	0.0402454	LDHB, DHRS7, LDHA, MDH1, PHGDH	613	40	18811	3.83585	1	0.340947	0.314749
GOTERM_MF_DIRECT	GO:0005504~fatty acid binding	5	0.805153	0.0341812	FABP5, ACOX1, GSTP1, NME2, ADH5	613	38	18811	4.03774	1	0.306948	0.283363
GOTERM_MF_DIRECT	GO:0097718~disordered domain specific binding	5	0.805153	0.0313631	CLTC, CTNNB1, EZR, AP2A2, GAPDH	613	37	18811	4.14686	1	0.284485	0.262626
GOTERM_MF_DIRECT	GO:0031210~phosphatidylcholine binding	5	0.805153	0.017391	SCARB2, IGHM, APOA2, APOA1, VDAC1	613	31	18811	4.94948	1	0.181594	0.167641
GOTERM_MF_DIRECT	GO:0003746~translation elongation factor activity	5	0.805153	0.017391	EEF1G, EEF1A1, EEF1B2, EEF1D, EEF2	613	31	18811	4.94948	1	0.181594	0.167641
GOTERM_MF_DIRECT	GO:0004177~aminopeptidase activity	5	0.805153	0.0155368	NPEPPS, ENPEP, ANPEP, ERAP1, LAP3	613	30	18811	5.11446	0.999999	0.166096	0.153334
GOTERM_MF_DIRECT	GO:0070006~metalloaminopeptidase activity	5	0.805153	0.01074	NPEPPS, ENPEP, ANPEP, ERAP1, LAP3	613	27	18811	5.68274	0.999939	0.117616	0.108579
GOTERM_MF_DIRECT	GO:0048027~mRNA 5'-UTR binding	5	0.805153	0.00938558	RPS14, SYNCRIP, RPL5, NCL, RPS3A	613	26	18811	5.90131	0.99979	0.110898	0.102377
GOTERM_MF_DIRECT	GO:0005539~glycosaminoglycan binding	5	0.805153	0.00938558	VCAN, BGN, GNS, DCN, HABP2	613	26	18811	5.90131	0.99979	0.110898	0.102377
GOTERM_MF_DIRECT	GO:0035925~mRNA 3'-UTR AU-rich region binding	5	0.805153	0.00938558	NUDT21, ILF3, HNRNPD, ELAVL1, HNRNPA0	613	26	18811	5.90131	0.99979	0.110898	0.102377
GOTERM_MF_DIRECT	GO:0005540~hyaluronic acid binding	5	0.805153	0.00814736	ACAN, VCAN, STAB1, ITIH1, HABP2	613	25	18811	6.13736	0.999355	0.100875	0.0931242
GOTERM_MF_DIRECT	GO:0017134~fibroblast growth factor binding	5	0.805153	0.00600302	RPS19, ITGB3, S100A13, ITGAV, RPS2	613	23	18811	6.67104	0.995515	0.0811195	0.0748865
GOTERM_MF_DIRECT	GO:0015035~protein disulfide oxidoreductase activity	5	0.805153	0.00600302	ERO1A, STAB1, TXN, PDIA5, TXNDC5	613	23	18811	6.67104	0.995515	0.0811195	0.0748865
GOTERM_MF_DIRECT	GO:0016209~antioxidant activity	5	0.805153	0.00427125	PRDX2, PRDX1, CAT, APOE, S100A9	613	21	18811	7.30638	0.978588	0.0668124	0.0616787
GOTERM_MF_DIRECT	GO:0030506~ankyrin binding	5	0.805153	0.0035478	PTPRC, SLC4A1, ATP1A1, SPTB, PLEC	613	20	18811	7.6717	0.958893	0.0574721	0.0530561
GOTERM_MF_DIRECT	GO:0044548~S100 protein binding	5	0.805153	0.000855907	AHNAK, ANXA11, ATP2A2, IQGAP1, EZR	613	14	18811	10.9596	0.536493	0.0187465	0.017306
GOTERM_MF_DIRECT	GO:0038024~cargo receptor activity	4	0.644122	0.0258701	SCARB2, ITGAM, SURF4, ITGB2	613	20	18811	6.13736	1	0.24555	0.226683
GOTERM_MF_DIRECT	GO:0003756~protein disulfide isomerase activity	4	0.644122	0.0258701	ERO1A, ITGB3, PDIA5, TXNDC5	613	20	18811	6.13736	1	0.24555	0.226683
GOTERM_MF_DIRECT	GO:0043395~heparan sulfate proteoglycan binding	4	0.644122	0.0225218	APP, PTPRC, AZU1, APOE	613	19	18811	6.46038	1	0.224717	0.20745
GOTERM_MF_DIRECT	GO:0017166~vinculin binding	4	0.644122	0.00605235	ACTN1, RTCB, CTNNA1, UTRN	613	12	18811	10.2289	0.99571	0.0811195	0.0748865
GOTERM_MF_DIRECT	GO:0048407~platelet-derived growth factor binding	4	0.644122	0.00465071	COL2A1, COL5A1, COL4A1, COL6A1	613	11	18811	11.1588	0.984794	0.0673603	0.0621845
GOTERM_MF_DIRECT	GO:0050786~RAGE receptor binding	4	0.644122	0.00465071	APP, S100A13, S100A4, S100A9	613	11	18811	11.1588	0.984794	0.0673603	0.0621845
GOTERM_MF_DIRECT	GO:0008097~5S rRNA binding	4	0.644122	0.00465071	RPL5, RPL3, TST, EEF2	613	11	18811	11.1588	0.984794	0.0673603	0.0621845
GOTERM_MF_DIRECT	GO:0051920~peroxiredoxin activity	4	0.644122	0.00169799	PRDX2, PRDX1, PARK7, PRDX6	613	8	18811	15.3434	0.782616	0.0324424	0.0299497
GOTERM_MF_DIRECT	GO:0016504~peptidase activator activity	3	0.483092	0.0478487	APP, FBLN1, PCOLCE	613	11	18811	8.36912	1	0.397853	0.367283
GOTERM_MF_DIRECT	GO:0001851~complement component C3b binding	3	0.483092	0.0478487	ITGAM, CFHR1, ITGB2	613	11	18811	8.36912	1	0.397853	0.367283
GOTERM_MF_DIRECT	GO:0002161~aminoacyl-tRNA editing activity	3	0.483092	0.0399945	AARS1, IARS1, VARS1	613	10	18811	9.20604	1	0.340947	0.314749
GOTERM_MF_DIRECT	GO:0005528~FK506 binding	3	0.483092	0.0399945	FKBP1A, FKBP10, FKBP3	613	10	18811	9.20604	1	0.340947	0.314749
GOTERM_MF_DIRECT	GO:1903136~cuprous ion binding	3	0.483092	0.0259769	COX17, SNCG, PARK7	613	8	18811	11.5075	1	0.24555	0.226683
GOTERM_MF_DIRECT	GO:0008379~thioredoxin peroxidase activity	3	0.483092	0.0199072	PRDX2, PRDX1, PRDX6	613	7	18811	13.1515	1	0.203144	0.187535
GOTERM_MF_DIRECT	GO:0060228~phosphatidylcholine-sterol O-acyltransferase activator activity	3	0.483092	0.0145301	APOA2, APOA1, APOE	613	6	18811	15.3434	0.999998	0.157205	0.145126
GOTERM_MF_DIRECT	GO:0070051~fibrinogen binding	3	0.483092	0.00989902	ITGB3, ITGA2B, FBLN1	613	5	18811	18.4121	0.999868	0.112523	0.103877
GOTERM_MF_DIRECT	GO:0019960~C-X3-C chemokine binding	3	0.483092	0.00989902	ITGB1, ITGB3, ITGAV	613	5	18811	18.4121	0.999868	0.112523	0.103877
GOTERM_MF_DIRECT	GO:0038132~neuregulin binding	3	0.483092	0.00989902	ITGB3, ITGAV, ITGA6	613	5	18811	18.4121	0.999868	0.112523	0.103877

## Sheet: C-A(BP)
Category	Term	Count	%	PValue	Genes	List Total	Pop Hits	Pop Total	Fold Enrichment	Bonferroni	Benjamini	FDR
GOTERM_BP_DIRECT	GO:0007155~cell adhesion	46	8.96686	2.44603e-11	ITGB1, APP, COL15A1, ITGAM, TNXB, ITGB3, COL12A1, ITGA2B, ITGB2, TNC, DPT, ATP2A2, THY1, ICAM1, COMP, VTN, ACAN, BSG, STAB1, CTNNA1, SPP1, CYP1B1, FLOT2, NCAM1, ITGAV, HABP2, FGB, AOC3, SIGLEC16, OMD, NME2, RPSA, COL1A1, VCAN, CXCL12, MMRN1, COL5A1, COL6A2, COL6A1, COL6A3, CTNNB1, CD9, ITGA6, TGFBI, MFGE8, FERMT2	507	557	19256	3.13661	7.06903e-08	2.35634e-08	2.28786e-08
GOTERM_BP_DIRECT	GO:0043066~negative regulation of apoptotic process	27	5.26316	0.00164075	ARF4, ARL6IP1, TFRC, GSTP1, GLO1, AKR1B1, HSPB1, PARK7, MPO, HSPD1, HSP90B1, COMP, RPS6KA3, TGM2, HSPA5, NME2, ADAM10, RPS3A, SOD2, MMP9, ATAD3A, ACTC1, DDAH2, CAT, CTNNB1, VDAC1, LTF	507	526	19256	1.94956	0.991311	0.0615814	0.0597914
GOTERM_BP_DIRECT	GO:0045087~innate immune response	27	5.26316	0.00851491	APCS, USP14, APP, IGHM, ITGAM, DDX1, HMGB2, ENDOD1, C4BPA, C4BPB, CORO1A, IPO7, C7, LBP, IGHA1, CAMP, FGB, FGA, HLA-B, CYBB, CYBA, CNPY3, HLA-A, PML, BST2, S100A9, LTF	507	597	19256	1.7177	1	0.200115	0.194298
GOTERM_BP_DIRECT	GO:0006412~translation	25	4.87329	5.48694e-09	RPL30, RPL3, RPL32, RPL31, RRBP1, RPL8, RPL9, RPS15, RPS4X, QARS1, RACK1, RPL38, RPS2, RPS11, RPL23, RPSA, RPS3A, RPS26, EEF1A1, SARS1, RPL27A, RPL24, RPL29, RPL28, RPS23	507	223	19256	4.25788	1.58571e-05	3.17145e-06	3.07927e-06
GOTERM_BP_DIRECT	GO:0006508~proteolysis	22	4.2885	0.00285782	ENPEP, CPB2, TINAGL1, ERAP1, PLG, PCOLCE, PARK7, MMP9, ACAN, NPEPPS, NCSTN, F9, PITRM1, CAPN2, CTSG, PRTN3, UQCRC2, ELANE, HABP2, CTSB, TGM2, LTF	507	409	19256	2.04295	0.999744	0.0888074	0.0862262
GOTERM_BP_DIRECT	GO:0002181~cytoplasmic translation	21	4.09357	1.57804e-13	RPL30, RPL3, RPL32, RPL31, RPL23, RPS3A, RPSA, RPL8, RPL9, RPS15, RPS4X, RPS26, RPL27A, RACK1, RPL24, RPL38, RPS2, RPL29, RPS11, RPL28, RPS23	507	90	19256	8.86206	4.55934e-10	2.28027e-10	2.21399e-10
GOTERM_BP_DIRECT	GO:0006886~intracellular protein transport	21	4.09357	0.000456157	BCAP31, ARF4, COPB2, COPA, TMED9, SEC23A, SEC13, COPB1, STX7, USO1, CLTA, IPO7, ARCN1, RAB32, EHD1, RAB31, CTTN, MYO6, COPG1, TMED4, SEC31A	507	328	19256	2.43166	0.732489	0.0258489	0.0250976
GOTERM_BP_DIRECT	GO:0042493~response to drug	21	4.09357	0.000103416	CPB2, CPT1A, APOA2, CYBB, APOA1, CYBA, SOD2, HSPD1, ICAM1, COL1A1, LDHA, ACTC1, LGALS1, OXCT1, DPYSL2, MYO6, CAT, HMOX1, CTNNB1, CALR, UQCRC2	507	293	19256	2.72214	0.258357	0.00869138	0.00843876
GOTERM_BP_DIRECT	GO:0010951~negative regulation of endopeptidase activity	20	3.89864	9.82398e-09	CSTB, USP14, APP, AHSG, SERPINC1, SERPINF1, PROS1, SERPINA10, PEBP1, ITIH1, SERPINA4, KNG1, BST2, VTN, CD109, SERPINH1, SPP2, COL6A3, A2M, GAPDH	507	146	19256	5.20278	2.83909e-05	4.1098e-06	3.99035e-06
GOTERM_BP_DIRECT	GO:0030335~positive regulation of cell migration	19	3.7037	0.000156978	ITGB1, SUN2, LRRC15, GRN, HSPA5, ADAM10, SOD2, CORO1A, MMP9, ACTG1, COL1A1, CXCL12, PECAM1, RACK1, ITGAV, ITGA6, CPNE3, FERMT2, FERMT3	507	256	19256	2.81885	0.364727	0.011065	0.0107434
GOTERM_BP_DIRECT	GO:0050821~protein stabilization	19	3.7037	2.19702e-05	CCT3, GRN, RPL23, CTNND1, APOA2, APOA1, P3H1, PARK7, RTN4, CPN2, PML, HSPD1, LAMP1, LAMP2, FLOT1, FLOT2, CCT8, CALR, GAPDH	507	220	19256	3.28011	0.0615207	0.00302351	0.00293563
GOTERM_BP_DIRECT	GO:0098609~cell-cell adhesion	19	3.7037	2.89088e-06	ITGAM, TNXB, CD93, COL14A1, ITGB2, ITGA2B, CTNND1, THY1, CNN3, ICAM1, RAB10, LGALS1, PECAM1, CTNNA1, MYH9, CTNNB1, ITGAV, ITGA6, PDLIM5	507	190	19256	3.79803	0.00831985	0.000556976	0.000540787
GOTERM_BP_DIRECT	GO:0001649~osteoblast differentiation	18	3.50877	3.03429e-08	TNC, HNRNPU, HSD17B4, RRBP1, SND1, RPS15, MRC2, COL1A1, SYNCRIP, VCAN, MYBBP1A, COL6A1, CAT, SPP1, TMEM119, ALPL, IARS1, CTHRC1	507	125	19256	5.46916	8.76872e-05	1.09614e-05	1.06428e-05
GOTERM_BP_DIRECT	GO:0030199~collagen fibril organization	18	3.50877	1.42007e-13	FKBP10, TNXB, COL14A1, LUM, COL12A1, DPT, PLOD3, COL1A1, COMP, ACAN, COL2A1, COL5A1, P4HA1, OPTC, COL5A2, SERPINH1, CYP1B1, FMOD	507	60	19256	11.3941	4.10373e-10	2.28027e-10	2.21399e-10
GOTERM_BP_DIRECT	GO:0001501~skeletal system development	17	3.31384	5.86757e-07	AHSG, HEXA, PRELP, MMP9, COL1A1, COMP, ACAN, RPS6KA3, VCAN, COL2A1, PRDX1, COL5A2, SH3PXD2B, SPP2, BPNT2, ALPL, RPL38	507	136	19256	4.74753	0.00169429	0.000154157	0.000149676
GOTERM_BP_DIRECT	GO:0001525~angiogenesis	16	3.11891	0.00285155	CLIC4, ENPEP, COL15A1, ERAP1, ITGA2B, THY1, HSPG2, ACTG1, BSG, CYP1B1, MYH9, HMOX1, ITGAV, CSPG4, TGFBI, MFGE8	507	252	19256	2.41145	0.999739	0.0888074	0.0862262
GOTERM_BP_DIRECT	GO:0006457~protein folding	16	3.11891	3.36342e-05	CCT3, ERO1A, APCS, FKBP10, P3H1, MESD, PDIA6, HSPD1, HSP90B1, DNAJB11, CANX, FKBP9, CCT8, P4HB, CALR, PPIA	507	166	19256	3.66075	0.0926294	0.00388811	0.0037751
GOTERM_BP_DIRECT	GO:0007160~cell-matrix adhesion	16	3.11891	1.31086e-07	FGB, ITGB1, FGA, CD63, ITGAM, TNXB, ITGB3, ITGB2, FGG, ITGA2B, VTN, CTNNB1, ITGAV, ITGA6, FERMT2, FERMT3	507	107	19256	5.67929	0.000378768	3.7884e-05	3.67829e-05
GOTERM_BP_DIRECT	GO:0007420~brain development	16	3.11891	0.00538045	RTN3, ARF4, COX17, CTNND1, HSPG2, RTN4, ACAT1, QARS1, OXCT1, DPYSL2, CD9, CSK, PHGDH, ATP6V0D1, NES, CDK5RAP3	507	270	19256	2.25068	1	0.147495	0.143208
GOTERM_BP_DIRECT	GO:0030036~actin cytoskeleton organization	16	3.11891	9.67211e-05	VASP, CAP1, TNXB, EPB41, RHOG, CORO1A, SPTB, ADD1, ADD2, SPTA1, CSRP1, FSCN1, PACSIN2, RAC2, FLNB, PDLIM5	507	182	19256	3.33893	0.243867	0.00847042	0.00822422
GOTERM_BP_DIRECT	GO:0030198~extracellular matrix organization	16	3.11891	3.13366e-05	ERO1A, APP, COL15A1, TNXB, COL14A1, FBLN2, MMP9, COL1A1, VTN, COL2A1, COL5A1, ABI3BP, COL5A2, VWA1, TGFBI, MATN2	507	165	19256	3.68294	0.0865843	0.00388811	0.0037751
GOTERM_BP_DIRECT	GO:0032496~response to lipopolysaccharide	16	3.11891	1.61197e-05	SPARC, HMGB2, ATP2A2, GNG12, SOD2, MPO, ADH5, DCN, HSPD1, RPS6KA3, ALPL, LBP, S100A9, ELANE, HNRNPA0, PCK2	507	156	19256	3.89541	0.0455178	0.0023293	0.00226159
GOTERM_BP_DIRECT	GO:0007229~integrin-mediated signaling pathway	15	2.92398	1.14285e-06	ITGB1, ITGAM, ITGB3, ITGB2, ITGA2B, NME2, ADAM10, APOA1, THY1, CTNNA1, MYH9, ITGAV, ITGA6, FERMT2, FERMT3	507	110	19256	5.17913	0.0032974	0.000254065	0.000246681
GOTERM_BP_DIRECT	GO:0007596~blood coagulation	15	2.92398	6.78404e-08	FGB, FGA, CPB2, SERPINC1, ITGB3, PROS1, SERPINA10, SLC4A1, PLG, C4BPB, KNG1, F9, MMRN1, CD59, LNPK	507	88	19256	6.47391	0.000196039	2.17843e-05	2.11511e-05
GOTERM_BP_DIRECT	GO:0016477~cell migration	15	2.92398	0.011731	ITGB1, CD63, ARF4, ENPEP, ITGB3, ITGB2, CORO1A, VTN, NARS1, COL5A1, FSCN1, CTNNA1, ITGAV, LCP1, CTHRC1	507	268	19256	2.12576	1	0.249965	0.2427
GOTERM_BP_DIRECT	GO:0043123~positive regulation of I-kappaB kinase/NF-kappaB signaling	15	2.92398	0.000574299	TFRC, PRKCB, DDX1, BST2, LGALS1, TFG, EEF1D, UBE2N, S100A13, HMOX1, CTNNB1, GAPDH, TGM2, TMED4, LTF	507	192	19256	2.96721	0.809899	0.0312252	0.0303176
GOTERM_BP_DIRECT	GO:0045766~positive regulation of angiogenesis	15	2.92398	0.000112924	ITGB1, GRN, PTGIS, PRKCB, ANXA3, ITGB3, ERAP1, ITGB2, CYBB, HSPB1, RTN4, STIM1, CYP1B1, HMOX1, CAMP	507	164	19256	3.47381	0.27846	0.00906526	0.00880177
GOTERM_BP_DIRECT	GO:0001666~response to hypoxia	14	2.72904	0.00107906	AHCY, TFRC, SLC2A1, CYBA, SOD2, PML, HSPD1, HSP90B1, LDHA, CXCL12, CAT, LONP1, CAPN2, HMOX1	507	182	19256	2.92156	0.955851	0.0456687	0.0443413
GOTERM_BP_DIRECT	GO:0006888~ER to Golgi vesicle-mediated transport	14	2.72904	3.888e-05	BCAP31, ARF4, COPB2, COPA, TMED9, SEC23A, COPB1, USO1, ANK1, ARCN1, TFG, COPG1, TMED4, SEC31A	507	130	19256	4.09018	0.106282	0.00401297	0.00389633
GOTERM_BP_DIRECT	GO:0008360~regulation of cell shape	14	2.72904	0.000234229	EPB42, WDR1, EPB41, ITGB2, RHOG, CORO1A, SYNE3, COCH, ICAM1, SPTA1, RAC2, MYH9, EZR, FERMT2	507	155	19256	3.43048	0.491862	0.0144026	0.013984
GOTERM_BP_DIRECT	GO:0009410~response to xenobiotic stimulus	13	2.53411	0.0260804	CPB2, CPT1A, APOA2, CYBB, CYBA, OXSR1, SOD2, COL1A1, OXCT1, CAT, HMOX1, CTNNB1, CALR	507	241	19256	2.04873	1	0.409633	0.397727
GOTERM_BP_DIRECT	GO:0042742~defense response to bacterium	13	2.53411	0.0213089	IGHM, ANXA3, DEFA3, EPX, LYZ, CFP, MPO, COCH, STAB1, IGHA1, S100A9, ELANE, CAMP	507	234	19256	2.11002	1	0.365818	0.355186
GOTERM_BP_DIRECT	GO:0045471~response to ethanol	13	2.53411	0.000205143	G6PD, CPT1A, SPARC, GSN, GSTP1, TNC, ICAM1, RPS4X, RBP4, ACTC1, OXCT1, TBXAS1, CAT	507	133	19256	3.71236	0.447291	0.0131747	0.0127918
GOTERM_BP_DIRECT	GO:0051092~positive regulation of NF-kappaB transcription factor activity	13	2.53411	0.00109036	APP, TFRC, PRKCB, ITGB2, ICAM1, PSMA6, CAT, FLOT1, UBE2N, FLOT2, PPIA, S100A9, LTF	507	160	19256	3.0859	0.95727	0.0456687	0.0443413
GOTERM_BP_DIRECT	GO:0070527~platelet aggregation	13	2.53411	1.24476e-09	FGB, FGA, ITGB3, FGG, ITGA2B, HSPB1, ACTG1, COMP, RAP2B, CSRP1, MYH9, PPIA, FERMT3	507	45	19256	10.9721	3.59735e-06	8.99338e-07	8.73198e-07
GOTERM_BP_DIRECT	GO:0001503~ossification	12	2.33918	1.36542e-05	COL1A1, SPARC, AHSG, CLEC11A, COL5A2, TMEM119, SPP1, RPL38, OSTF1, MESD, MMP9, LTF	507	85	19256	5.36192	0.0386926	0.00211164	0.00205026
GOTERM_BP_DIRECT	GO:0001934~positive regulation of protein phosphorylation	12	2.33918	0.0226942	NIBAN1, APP, RALB, TFRC, ITGB3, TMEM119, FLOT1, PECAM1, RACK1, PPIA, MMP9, CAMP	507	209	19256	2.18069	1	0.374779	0.363886
GOTERM_BP_DIRECT	GO:0005975~carbohydrate metabolic process	12	2.33918	0.00588622	GPI, LDHB, PYGB, LDHA, GANAB, MDH1, GLO1, HEXA, AKR1B1, SLC3A2, PGLS, PGM1	507	172	19256	2.64979	1	0.157511	0.152933
GOTERM_BP_DIRECT	GO:0006096~glycolytic process	12	2.33918	9.95453e-09	GPI, HK3, LDHA, PKM, TPI1, PGAM1, PGK1, ALDOC, ENO1, GAPDH, PFKM, PGM1	507	43	19256	10.5991	2.87682e-05	4.1098e-06	3.99035e-06
GOTERM_BP_DIRECT	GO:0006979~response to oxidative stress	12	2.33918	0.000326009	ERO1A, APP, GPX3, IDH1, PRDX1, GPX8, HMOX1, PARK7, OXSR1, APOE, EPX, MPO	507	120	19256	3.79803	0.610277	0.0188433	0.0182956
GOTERM_BP_DIRECT	GO:0007015~actin filament organization	12	2.33918	0.00106025	MYO1D, SPTA1, TF, MYO1B, ACTC1, MYO6, FSCN1, RHOG, CTNNA1, RAC2, CORO1A, MYO1G	507	138	19256	3.30263	0.953381	0.0456687	0.0443413
GOTERM_BP_DIRECT	GO:0007568~aging	12	2.33918	0.013829	GSN, TFRC, SERPINF1, CANX, NAMPT, ITGB2, CAT, LONP1, CTNNA1, SOD2, MPO, DCN	507	194	19256	2.3493	1	0.279482	0.271358
GOTERM_BP_DIRECT	GO:0016192~vesicle-mediated transport	12	2.33918	0.044434	RAB32, RAB10, RTN3, ARF4, COPB2, COPA, SEC23A, COPB1, GDI2, PLIN3, CLTA, COPG1	507	233	19256	1.95607	1	0.583701	0.566736
GOTERM_BP_DIRECT	GO:0046718~viral entry into host cell	12	2.33918	6.97612e-05	ITGB1, LAMP1, TFRC, ITGB3, BSG, RPSA, ITGAV, SLC3A2, NCAM1, SLC1A5, CTSB, ICAM1	507	101	19256	4.51251	0.182592	0.00672033	0.006525
GOTERM_BP_DIRECT	GO:0006909~phagocytosis	11	2.14425	1.38604e-05	CNN2, ITGB1, CD93, ANXA3, ITGB2, PECAM1, ANXA11, PRTN3, MESD, CORO1A, ELANE	507	70	19256	5.96833	0.0392652	0.00211164	0.00205026
GOTERM_BP_DIRECT	GO:0072659~protein localization to plasma membrane	11	2.14425	0.0102519	RAB10, EHD1, SEC23A, SCP2, BSG, FLOT1, FLOT2, SLC4A1, EZR, ANK1, RAB8B	507	161	19256	2.59493	1	0.231469	0.224742
GOTERM_BP_DIRECT	GO:0007605~sensory perception of sound	10	1.94932	0.0248433	COL1A1, COL2A1, WDR1, TIMM9, HEXA, MYO6, RPL38, ALDH7A1, COCH, ICAM1	507	159	19256	2.3887	1	0.400488	0.388848
GOTERM_BP_DIRECT	GO:0016525~negative regulation of angiogenesis	10	1.94932	0.00608241	SARS1, SPARC, SERPINF1, STAB1, PGK1, CTNNB1, HSPG2, DCN, PML, PF4	507	126	19256	3.01431	1	0.161268	0.15658
GOTERM_BP_DIRECT	GO:0030855~epithelial cell differentiation	10	1.94932	0.000818301	CPT1A, TST, PGK1, ANXA7, ALDOC, TAGLN2, VDAC1, HNRNPH3, CNN3, CTSB	507	94	19256	4.04045	0.906131	0.0387687	0.0376418
GOTERM_BP_DIRECT	GO:0033627~cell adhesion mediated by integrin	10	1.94932	7.3664e-07	ITGB1, VTN, ITGAM, MMRN1, ITGB3, ITGB2, ITGA2B, ITGAV, ITGA6, ICAM1	507	40	19256	9.49507	0.00212662	0.000177407	0.000172251
GOTERM_BP_DIRECT	GO:0043524~negative regulation of neuron apoptotic process	10	1.94932	0.0239713	GPI, AARS1, GRN, HMOX1, PARK7, APOE, SOD2, NES, CORO1A, HSPD1	507	158	19256	2.40381	1	0.393619	0.382178
GOTERM_BP_DIRECT	GO:0050829~defense response to Gram-negative bacterium	10	1.94932	0.000818301	IGHM, APP, RPL30, HMGB2, DEFA3, CTSG, LBP, LYZ, CAMP, LTF	507	94	19256	4.04045	0.906131	0.0387687	0.0376418
GOTERM_BP_DIRECT	GO:0051592~response to calcium ion	10	1.94932	3.27301e-05	FGB, FGA, SPARC, FGG, HNRNPD, ANXA7, ANXA11, SLC25A13, ACTG1, SEC31A	507	62	19256	6.12585	0.0902555	0.00388811	0.0037751
GOTERM_BP_DIRECT	GO:0061844~antimicrobial humoral immune response mediated by antimicrobial peptide	10	1.94932	0.00232329	APP, RPL30, CXCL12, DEFA3, GAPDH, S100A9, KNG1, CAMP, LTF, PF4	507	109	19256	3.48443	0.998796	0.0789919	0.0766959
GOTERM_BP_DIRECT	GO:0071456~cellular response to hypoxia	10	1.94932	0.0117631	ERO1A, NPEPPS, ACAA2, PTGIS, PGK1, HMOX1, P4HB, NDRG1, RTN4, ICAM1	507	140	19256	2.71288	1	0.249965	0.2427
GOTERM_BP_DIRECT	GO:0000226~microtubule cytoskeleton organization	9	1.75439	0.0253041	EML4, TUBB8, TUBB2B, TUBA1B, TUBA1A, TUBB, MAP4, TUBB4B, GAPDH	507	134	19256	2.55091	1	0.404026	0.392283
GOTERM_BP_DIRECT	GO:0006094~gluconeogenesis	9	1.75439	1.38828e-05	GPI, RBP4, TPI1, GPD1, PGK1, ALDOC, PGM1, PCK2, SLC25A13	507	43	19256	7.94936	0.0393273	0.00211164	0.00205026
GOTERM_BP_DIRECT	GO:0006635~fatty acid beta-oxidation	9	1.75439	3.21968e-05	CPT1A, ACAA2, CPT2, SCP2, ACOX1, HSD17B4, HSD17B10, ALDH1L2, ACAT1	507	48	19256	7.1213	0.0888523	0.00388811	0.0037751
GOTERM_BP_DIRECT	GO:0006874~cellular calcium ion homeostasis	9	1.75439	0.00851699	CXCL12, STIM1, ATP13A1, PRKCB, ATP2A3, ATP2A2, CALR, APOE, ELANE	507	110	19256	3.10748	1	0.200115	0.194298
GOTERM_BP_DIRECT	GO:0006879~cellular iron ion homeostasis	9	1.75439	0.000129972	ATP6V1A, TF, TFRC, FTH1, HMOX1, ACO1, ATP6V0D1, CP, FTL	507	58	19256	5.89349	0.313153	0.0101519	0.00985681
GOTERM_BP_DIRECT	GO:0007010~cytoskeleton organization	9	1.75439	0.0353243	CNN2, EPB42, DPYSL2, PACSIN2, APOE, THY1, SYNE3, ANK1, ADD1	507	143	19256	2.39037	1	0.507896	0.493134
GOTERM_BP_DIRECT	GO:0007159~leukocyte cell-cell adhesion	9	1.75439	1.29812e-06	ITGB1, NT5E, PTPRC, ITGB2, PECAM1, GFUS, EZR, ICAM1, FERMT3	507	32	19256	10.682	0.00374454	0.000267969	0.00026018
GOTERM_BP_DIRECT	GO:0007417~central nervous system development	9	1.75439	0.044761	ACAN, RPS6KA3, APP, VCAN, COL2A1, GSN, GSTP1, SLC2A1, NES	507	150	19256	2.27882	1	0.585336	0.568323
GOTERM_BP_DIRECT	GO:0007584~response to nutrient	9	1.75439	0.000847033	LDHA, AHCY, TFRC, OXCT1, SERPINC1, CYBB, CYP1B1, APOA1, A2M	507	76	19256	4.49766	0.913617	0.0394827	0.0383351
GOTERM_BP_DIRECT	GO:0010976~positive regulation of neuron projection development	9	1.75439	0.019849	EHD1, HSPA5, SERPINF1, DPYSL3, NME2, P3H1, ITGA6, APOE, S100A9	507	128	19256	2.67049	1	0.351925	0.341696
GOTERM_BP_DIRECT	GO:0019731~antibacterial humoral response	9	1.75439	0.00014695	IGHM, APP, TF, DEFA3, CTSG, HLA-A, IGHA1, CAMP, LTF	507	59	19256	5.7936	0.346045	0.0106171	0.0103085
GOTERM_BP_DIRECT	GO:0030168~platelet activation	9	1.75439	0.000261563	FGB, FGA, RAP2B, ITGB3, FGG, CD9, CTSG, PPIA, PF4	507	64	19256	5.34098	0.530466	0.0157483	0.0152905
GOTERM_BP_DIRECT	GO:0032092~positive regulation of protein binding	9	1.75439	0.000923931	SPTA1, VTN, APP, RALB, EPB41, FLOT1, ADD1, CTHRC1, ADD2	507	77	19256	4.43925	0.930844	0.0410794	0.0398854
GOTERM_BP_DIRECT	GO:0032760~positive regulation of tumor necrosis factor production	9	1.75439	0.0076551	APP, PTPRC, DDT, CYBB, HSPB1, CYBA, LBP, HSPD1, PF4	507	108	19256	3.16502	1	0.187485	0.182036
GOTERM_BP_DIRECT	GO:0034976~response to endoplasmic reticulum stress	9	1.75439	0.00163219	ERO1A, NIBAN1, BCAP31, FLOT1, ATP2A2, P4HB, PDIA6, CDK5RAP3, HSP90B1	507	84	19256	4.06932	0.991093	0.0615814	0.0597914
GOTERM_BP_DIRECT	GO:0050830~defense response to Gram-positive bacterium	9	1.75439	0.020694	APP, HMGB2, DEFA3, CTSG, HLA-A, LBP, LYZ, CAMP, LTF	507	129	19256	2.64979	1	0.363504	0.352939
GOTERM_BP_DIRECT	GO:0098869~cellular oxidant detoxification	9	1.75439	0.000923931	GPX3, GSTP1, ALOX5AP, GPX8, PARK7, APOE, TXN, EPX, S100A9	507	77	19256	4.43925	0.930844	0.0410794	0.0398854
GOTERM_BP_DIRECT	GO:0006749~glutathione metabolic process	8	1.55945	0.000209975	EEF1G, GSTM3, G6PD, GLO1, GSTP1, IDH1, HAGH, SOD2	507	47	19256	6.46473	0.454958	0.0131919	0.0128085
GOTERM_BP_DIRECT	GO:0006898~receptor-mediated endocytosis	8	1.55945	0.00353051	CAP1, ITGAM, CTTN, ITGB2, STAB1, M6PR, APOE, HSPG2	507	75	19256	4.05123	0.999964	0.107402	0.10428
GOTERM_BP_DIRECT	GO:0007017~microtubule-based process	8	1.55945	7.29399e-05	EML4, TUBB8, TUBB2B, TUBA1B, TUBA1A, DCTN2, TUBB, TUBB4B	507	40	19256	7.59606	0.190067	0.00679989	0.00660224
GOTERM_BP_DIRECT	GO:0010595~positive regulation of endothelial cell migration	8	1.55945	0.00201694	GPI, GRN, SPARC, ANXA3, ITGB3, BSG, CALR, GFUS	507	68	19256	4.46827	0.997076	0.0710847	0.0690186
GOTERM_BP_DIRECT	GO:0016485~protein processing	8	1.55945	0.00540986	COMP, NCSTN, PITRM1, DDI2, ADAM10, CTSG, GLG1, CPN1	507	81	19256	3.75114	1	0.147495	0.143208
GOTERM_BP_DIRECT	GO:0022617~extracellular matrix disassembly	8	1.55945	0.000182791	SH3PXD2B, FLOT1, ADAM10, CTSG, PLG, LCP1, MMP9, ELANE	507	46	19256	6.60527	0.410403	0.0122853	0.0119282
GOTERM_BP_DIRECT	GO:0022900~electron transport chain	8	1.55945	0.000961669	P4HA2, CYBB, AKR1B1, PHGDH, CYBA, ME2, GFUS, ADH5	507	60	19256	5.06404	0.937996	0.0421094	0.0408855
GOTERM_BP_DIRECT	GO:0031640~killing of cells of other organism	8	1.55945	0.00238474	RPL30, CXCL12, DEFA3, LYZ, GAPDH, KNG1, LTF, PF4	507	70	19256	4.3406	0.998992	0.0801384	0.0778091
GOTERM_BP_DIRECT	GO:0032869~cellular response to insulin stimulus	8	1.55945	0.0249439	RAB10, PKM, RAB31, EPRS1, GSTP1, ENPP1, RAB8B, PCK2	507	109	19256	2.78754	1	0.400488	0.388848
GOTERM_BP_DIRECT	GO:0042060~wound healing	8	1.55945	0.0189281	CNN2, COL1A1, FKBP10, SPARC, GSN, ITGB3, TNC, DCN	507	103	19256	2.94992	1	0.34184	0.331904
GOTERM_BP_DIRECT	GO:0051017~actin filament bundle assembly	8	1.55945	3.57631e-05	MYO1B, DPYSL3, FSCN1, PLS3, LCP1, EZR, ADD1, ADD2	507	36	19256	8.44006	0.0981951	0.00395947	0.00384439
GOTERM_BP_DIRECT	GO:0071333~cellular response to glucose stimulus	8	1.55945	0.00702481	CPB2, LGALS1, SERPINF1, RACK1, NME2, CYBA, PCK2, ICAM1	507	85	19256	3.57461	1	0.176536	0.171405
GOTERM_BP_DIRECT	GO:0071346~cellular response to interferon-gamma	8	1.55945	0.0155342	SYNCRIP, GSN, EPRS1, FLNB, GAPDH, ACTG1, ICAM1, HLA-DPA1	507	99	19256	3.06911	1	0.304145	0.295305
GOTERM_BP_DIRECT	GO:1900026~positive regulation of substrate adhesion-dependent cell spreading	8	1.55945	0.000136929	FGB, FGA, ITGB3, FGG, APOA1, P4HB, CALR, FERMT2	507	44	19256	6.9055	0.326827	0.0101763	0.00988054
GOTERM_BP_DIRECT	GO:0001895~retina homeostasis	7	1.36452	0.000657987	TF, PRDX1, HSPB1, IGHA1, LYZ, ACTG1, LTF	507	41	19256	6.48444	0.850761	0.0338117	0.0328289
GOTERM_BP_DIRECT	GO:0006006~glucose metabolic process	7	1.36452	0.00824379	HK3, G6PD, CPT1A, FABP5, AKR1A1, GAPDH, PGM1	507	67	19256	3.96809	1	0.19827	0.192507
GOTERM_BP_DIRECT	GO:0006418~tRNA aminoacylation for protein translation	7	1.36452	3.69916e-05	GARS1, AARS1, QARS1, NARS1, EPRS1, IARS1, VARS1	507	25	19256	10.6345	0.101391	0.00395947	0.00384439
GOTERM_BP_DIRECT	GO:0006469~negative regulation of protein kinase activity	7	1.36452	0.0108427	PTPRC, QARS1, GSTP1, HSPB1, PARK7, THY1, PPIA	507	71	19256	3.74453	1	0.239202	0.232249
GOTERM_BP_DIRECT	GO:0006869~lipid transport	7	1.36452	0.0297923	SCP2, APOA2, HDLBP, APOF, APOA1, LBP, APOE	507	89	19256	2.98721	1	0.448436	0.435402
GOTERM_BP_DIRECT	GO:0008203~cholesterol metabolic process	7	1.36452	0.0208795	APP, CAT, APOA2, HDLBP, APOF, APOA1, APOE	507	82	19256	3.24222	1	0.363504	0.352939
GOTERM_BP_DIRECT	GO:0009306~protein secretion	7	1.36452	0.00373137	RCN3, RAB10, COMP, CANX, FGG, COPG1, RAB8B	507	57	19256	4.66424	0.99998	0.11233	0.109065
GOTERM_BP_DIRECT	GO:0014070~response to organic cyclic compound	7	1.36452	0.00481996	G6PD, CPT1A, LUM, NAMPT, CTNNA1, ANXA7, ACAT1	507	60	19256	4.43103	0.999999	0.136565	0.132596
GOTERM_BP_DIRECT	GO:0019882~antigen processing and presentation	7	1.36452	0.00137605	RAB32, RAB10, HLA-B, HLA-DRA, HLA-A, RAB8B, HLA-DPA1	507	47	19256	5.65664	0.981306	0.0537405	0.0521785
GOTERM_BP_DIRECT	GO:0032956~regulation of actin cytoskeleton organization	7	1.36452	0.0208795	BST2, ITGB3, FSCN1, RHOG, RAC2, IQGAP2, CORO1A	507	82	19256	3.24222	1	0.363504	0.352939
GOTERM_BP_DIRECT	GO:0034599~cellular response to oxidative stress	7	1.36452	0.0312406	G6PD, LONP1, GPX8, NME2, ATP2A2, PARK7, PPIA	507	90	19256	2.95402	1	0.4678	0.454203
GOTERM_BP_DIRECT	GO:0034613~cellular protein localization	7	1.36452	0.00661296	CD63, SEPTIN2, CTNNA1, CTNNB1, SEPTIN9, SEPTIN11, SEPTIN7	507	64	19256	4.15409	1	0.168477	0.16358
GOTERM_BP_DIRECT	GO:0042542~response to hydrogen peroxide	7	1.36452	0.00257759	COL1A1, LDHA, CAT, CAPN2, HMOX1, SOD2, HSPD1	507	53	19256	5.01626	0.999424	0.0827694	0.0803636
GOTERM_BP_DIRECT	GO:0043484~regulation of RNA splicing	7	1.36452	0.0167015	HNRNPL, PTBP1, AHNAK, HNRNPH1, FUS, HNRNPH3, HNRNPA1	507	78	19256	3.40849	1	0.321781	0.312429
GOTERM_BP_DIRECT	GO:0043627~response to estrogen	7	1.36452	0.0115737	GSTM3, LDHA, APOA2, CTNNA1, HMOX1, APOA1, HSPD1	507	72	19256	3.69253	1	0.249965	0.2427
GOTERM_BP_DIRECT	GO:0045727~positive regulation of translation	7	1.36452	0.022025	NIBAN1, HNRNPL, RPS4X, HNRNPD, CYP1B1, EIF3C, ELAVL1	507	83	19256	3.20316	1	0.365818	0.355186
GOTERM_BP_DIRECT	GO:0048661~positive regulation of smooth muscle cell proliferation	7	1.36452	0.010145	ITGB3, NAMPT, AKR1B1, HMOX1, CYBA, ELANE, TGM2	507	70	19256	3.79803	1	0.230859	0.224149
GOTERM_BP_DIRECT	GO:0051384~response to glucocorticoid	7	1.36452	0.00884639	SPARC, ANXA3, APOA2, ALPL, A2M, HSPD1, CPN1	507	68	19256	3.90973	1	0.206178	0.200185
GOTERM_BP_DIRECT	GO:0051402~neuron apoptotic process	7	1.36452	0.0131386	APP, AARS1, NCSTN, HSPA5, GAPDH, NES, CORO1A	507	74	19256	3.59273	1	0.269837	0.261994
GOTERM_BP_DIRECT	GO:0051603~proteolysis involved in cellular protein catabolic process	7	1.36452	0.0017147	PSMA6, HSPA5, PSMA2, PSMB1, LONP1, CAPN2, CTSB	507	49	19256	5.42575	0.992985	0.0635318	0.0616852
GOTERM_BP_DIRECT	GO:0055072~iron ion homeostasis	7	1.36452	0.00075084	TF, EPB42, HMOX1, SOD2, CP, FTL, LTF	507	42	19256	6.33005	0.885907	0.0367785	0.0357095
GOTERM_BP_DIRECT	GO:0060348~bone development	7	1.36452	0.00311479	SH3PXD2B, OGN, CHAD, BGN, PLS3, P3H1, TGM2	507	55	19256	4.83385	0.999879	0.0957633	0.0929799
GOTERM_BP_DIRECT	GO:0071277~cellular response to calcium ion	7	1.36452	0.0342733	NCSTN, CLIC4, HSPA5, FUS, ALOX5AP, CPNE3, ADD1	507	92	19256	2.8898	1	0.495249	0.480855
GOTERM_BP_DIRECT	GO:0001916~positive regulation of T cell mediated cytotoxicity	6	1.16959	0.000614382	PTPRC, STX7, HLA-B, HLA-DRA, HLA-A, CYRIB	507	27	19256	8.44006	0.830705	0.032283	0.0313447
GOTERM_BP_DIRECT	GO:0006826~iron ion transport	6	1.16959	0.000137328	TF, TFRC, FTH1, CP, FTL, LTF	507	20	19256	11.3941	0.327601	0.0101763	0.00988054
GOTERM_BP_DIRECT	GO:0006953~acute-phase response	6	1.16959	0.00468791	APCS, CD163, TFRC, AHSG, LBP, A2M	507	42	19256	5.42575	0.999999	0.134139	0.13024
GOTERM_BP_DIRECT	GO:0009612~response to mechanical stimulus	6	1.16959	0.0247983	COL1A1, CAPN2, TNC, MPO, DCN, ACTG1	507	63	19256	3.61717	1	0.400488	0.388848
GOTERM_BP_DIRECT	GO:0014823~response to activity	6	1.16959	0.0156239	OXCT1, ITGB3, CAT, CYBA, SOD2, HSPD1	507	56	19256	4.06932	1	0.304145	0.295305
GOTERM_BP_DIRECT	GO:0031032~actomyosin structure organization	6	1.16959	0.00207896	CNN2, ACTC1, EPB41, EPB41L2, MYH9, CNN3	507	35	19256	6.5109	0.997557	0.0715263	0.0694473
GOTERM_BP_DIRECT	GO:0031100~animal organ regeneration	6	1.16959	0.00631461	CXCL12, ANXA3, GSTP1, APOA2, APOA1, LCP1	507	45	19256	5.06404	1	0.165902	0.16108
GOTERM_BP_DIRECT	GO:0031589~cell-substrate adhesion	6	1.16959	0.000176369	ITGB1, ITGB3, ITGAV, ITGA6, CORO1A, MYO1G	507	21	19256	10.8515	0.399355	0.0121359	0.0117831
GOTERM_BP_DIRECT	GO:0031623~receptor internalization	6	1.16959	0.00830128	ITGB1, RAB31, TFRC, ITGB2, CD9, EZR	507	48	19256	4.74753	1	0.19827	0.192507
GOTERM_BP_DIRECT	GO:0034975~protein folding in endoplasmic reticulum	6	1.16959	4.9789e-06	ERO1A, HSPA5, CANX, P4HB, CALR, HSP90B1	507	11	19256	20.7165	0.014286	0.000899314	0.000873175
GOTERM_BP_DIRECT	GO:0035987~endodermal cell differentiation	6	1.16959	0.00118604	VTN, COL12A1, ITGB2, COL6A1, ITGAV, MMP9	507	31	19256	7.35102	0.967603	0.0489666	0.0475433
GOTERM_BP_DIRECT	GO:0042730~fibrinolysis	6	1.16959	0.000105259	FGB, FGA, CPB2, PROS1, FGG, PLG	507	19	19256	11.9938	0.262297	0.00869138	0.00843876
GOTERM_BP_DIRECT	GO:0046034~ATP metabolic process	6	1.16959	0.00207896	ATP6V1A, NT5E, ATP6V1B2, ENPP1, NDUFS1, MYH7	507	35	19256	6.5109	0.997557	0.0715263	0.0694473
GOTERM_BP_DIRECT	GO:0050766~positive regulation of phagocytosis	6	1.16959	0.0098435	AHSG, APOA2, APOA1, CYBA, CALR, MFGE8	507	50	19256	4.55763	1	0.225776	0.219213
GOTERM_BP_DIRECT	GO:0061621~canonical glycolysis	6	1.16959	4.22079e-05	HK3, PKM, TPI1, PGK1, ENO1, PFKM	507	16	19256	14.2426	0.114837	0.00420623	0.00408398
GOTERM_BP_DIRECT	GO:0071353~cellular response to interleukin-4	6	1.16959	0.000511558	TUBA1B, RPL3, HSPA5, IMPDH2, CORO1A, PML	507	26	19256	8.76468	0.772085	0.0284308	0.0276045
GOTERM_BP_DIRECT	GO:0097421~liver regeneration	6	1.16959	0.00468791	RPS15, VTN, CPB2, CPT1A, SERPINA10, HMOX1	507	42	19256	5.42575	0.999999	0.134139	0.13024
GOTERM_BP_DIRECT	GO:1902042~negative regulation of extrinsic apoptotic signaling pathway via death domain receptors	6	1.16959	0.000731945	FGB, FGA, FGG, HMGB2, HMOX1, ICAM1	507	28	19256	8.13863	0.879499	0.036471	0.035411
GOTERM_BP_DIRECT	GO:0001958~endochondral ossification	5	0.974659	0.00751184	COL1A1, COL2A1, TMEM119, BPNT2, ALPL	507	30	19256	6.33005	1	0.185549	0.180156
GOTERM_BP_DIRECT	GO:0006090~pyruvate metabolic process	5	0.974659	0.000197195	LDHB, LDHA, VDAC1, ME2, PCK2	507	12	19256	15.8251	0.434446	0.0129521	0.0125756
GOTERM_BP_DIRECT	GO:0006099~tricarboxylic acid cycle	5	0.974659	0.0105454	FH, MDH1, IDH1, ACO1, SDHB	507	33	19256	5.75459	1	0.234431	0.227617
GOTERM_BP_DIRECT	GO:0006509~membrane protein ectodomain proteolysis	5	0.974659	0.00280494	NCSTN, ERAP1, MYH9, ADAM10, PRTN3	507	23	19256	8.25658	0.999702	0.0888074	0.0862262
GOTERM_BP_DIRECT	GO:0006641~triglyceride metabolic process	5	0.974659	0.0142747	CPT1A, TNXB, CAT, APOA2, APOE	507	36	19256	5.27504	1	0.286485	0.278159
GOTERM_BP_DIRECT	GO:0007162~negative regulation of cell adhesion	5	0.974659	0.0474125	ARHGDIB, TNC, ADAM10, TGFBI, KNG1	507	52	19256	3.65195	1	0.597181	0.579823
GOTERM_BP_DIRECT	GO:0007566~embryo implantation	5	0.974659	0.0259275	ITGB3, BSG, SPP1, RPL29, MMP9	507	43	19256	4.41631	1	0.409456	0.397555
GOTERM_BP_DIRECT	GO:0008344~adult locomotory behavior	5	0.974659	0.0419911	CSTB, APP, CXCL12, PARK7, ARCN1	507	50	19256	3.79803	1	0.569738	0.553179
GOTERM_BP_DIRECT	GO:0010498~proteasomal protein catabolic process	5	0.974659	0.0117086	PSMA5, PSMA6, PSMA2, DDI2, PSMB1	507	34	19256	5.58533	1	0.249965	0.2427
GOTERM_BP_DIRECT	GO:0021762~substantia nigra development	5	0.974659	0.0369401	YWHAE, LDHA, G6PD, YWHAQ, HSPA5	507	48	19256	3.95628	1	0.52585	0.510566
GOTERM_BP_DIRECT	GO:0030968~endoplasmic reticulum unfolded protein response	5	0.974659	0.0474125	ERO1A, HSPA5, CANX, CALR, CDK5RAP3	507	52	19256	3.65195	1	0.597181	0.579823
GOTERM_BP_DIRECT	GO:0032930~positive regulation of superoxide anion generation	5	0.974659	0.00197617	APP, ITGAM, GSTP1, ITGB2, CYBA	507	21	19256	9.04292	0.99671	0.070508	0.0684586
GOTERM_BP_DIRECT	GO:0032964~collagen biosynthetic process	5	0.974659	8.72403e-05	RCN3, COL1A1, COL5A1, SERPINH1, PCOLCE	507	10	19256	18.9901	0.22286	0.00787889	0.00764988
GOTERM_BP_DIRECT	GO:0033690~positive regulation of osteoblast proliferation	5	0.974659	0.000278936	ITGB3, TMEM119, ITGAV, CTHRC1, LTF	507	13	19256	14.6078	0.553465	0.0164515	0.0159734
GOTERM_BP_DIRECT	GO:0034113~heterotypic cell-cell adhesion	5	0.974659	0.00664579	ITGB1, PTPRC, ITGB3, ITGB2, ITGAV	507	29	19256	6.54832	1	0.168477	0.16358
GOTERM_BP_DIRECT	GO:0034116~positive regulation of heterotypic cell-cell adhesion	5	0.974659	0.000666874	FGB, FGA, FGG, FLOT1, THY1	507	16	19256	11.8688	0.854548	0.0338117	0.0328289
GOTERM_BP_DIRECT	GO:0042744~hydrogen peroxide catabolic process	5	0.974659	0.00584851	GPX3, PRDX1, CAT, EPX, MPO	507	28	19256	6.78219	1	0.157511	0.152933
GOTERM_BP_DIRECT	GO:0045214~sarcomere organization	5	0.974659	0.0187468	ITGB1, CSRP1, WDR1, MYH7, ACTG1	507	39	19256	4.86927	1	0.34184	0.331904
GOTERM_BP_DIRECT	GO:0045429~positive regulation of nitric oxide biosynthetic process	5	0.974659	0.0394193	APP, DDAH2, ITGB2, SOD2, ICAM1	507	49	19256	3.87554	1	0.539914	0.524221
GOTERM_BP_DIRECT	GO:0045907~positive regulation of vasoconstriction	5	0.974659	0.0171711	FGB, FGA, TBXAS1, FGG, ICAM1	507	38	19256	4.9974	1	0.323918	0.314503
GOTERM_BP_DIRECT	GO:0050714~positive regulation of protein secretion	5	0.974659	0.0474125	FGB, FGA, FGG, EZR, PPIA	507	52	19256	3.65195	1	0.597181	0.579823
GOTERM_BP_DIRECT	GO:0050765~negative regulation of phagocytosis	5	0.974659	0.00133415	CNN2, DYSF, RACK1, CSK, PRTN3	507	19	19256	9.99481	0.978895	0.0532967	0.0517476
GOTERM_BP_DIRECT	GO:0050778~positive regulation of immune response	5	0.974659	0.00163335	C7, C9, CTSG, CFP, ELANE	507	20	19256	9.49507	0.991123	0.0615814	0.0597914
GOTERM_BP_DIRECT	GO:0050807~regulation of synapse organization	5	0.974659	0.00445043	SPARC, TUBA1A, TUBB, APOE, SEPTIN11	507	26	19256	7.3039	0.999997	0.129917	0.126141
GOTERM_BP_DIRECT	GO:0050832~defense response to fungus	5	0.974659	0.0129512	DEFA3, CTSG, MPO, GAPDH, S100A9	507	35	19256	5.42575	1	0.269273	0.261446
GOTERM_BP_DIRECT	GO:0050870~positive regulation of T cell activation	5	0.974659	0.0105454	HLA-DRA, THY1, CYRIB, HSPD1, HLA-DPA1	507	33	19256	5.75459	1	0.234431	0.227617
GOTERM_BP_DIRECT	GO:0050900~leukocyte migration	5	0.974659	0.00751184	MYH9, ITGA6, MMP9, ADD2, ICAM1	507	30	19256	6.33005	1	0.185549	0.180156
GOTERM_BP_DIRECT	GO:1901216~positive regulation of neuron death	5	0.974659	0.0259275	APP, ITGAM, ITGB2, CAPN2, APOE	507	43	19256	4.41631	1	0.409456	0.397555
GOTERM_BP_DIRECT	GO:1901998~toxin transport	5	0.974659	0.0279468	CCT3, COPB2, HSPA5, ADAM10, CCT8	507	44	19256	4.31594	1	0.42286	0.410569
GOTERM_BP_DIRECT	GO:2001237~negative regulation of extrinsic apoptotic signaling pathway	5	0.974659	0.0156809	CTTN, GSTP1, ITGAV, ITGA6, PARK7	507	37	19256	5.13247	1	0.304145	0.295305
GOTERM_BP_DIRECT	GO:0001774~microglial cell activation	4	0.779727	0.0433324	APP, ITGAM, NAMPT, ITGB2	507	30	19256	5.06404	1	0.583701	0.566736
GOTERM_BP_DIRECT	GO:0001878~response to yeast	4	0.779727	0.00528971	APP, MPO, CAMP, ELANE	507	14	19256	10.8515	1	0.146993	0.142721
GOTERM_BP_DIRECT	GO:0002438~acute inflammatory response to antigenic stimulus	4	0.779727	0.00134625	SERPINC1, A2M, ELANE, ICAM1	507	9	19256	16.8801	0.979622	0.0532967	0.0517476
GOTERM_BP_DIRECT	GO:0002504~antigen processing and presentation of peptide or polysaccharide antigen via MHC class II	4	0.779727	0.0147437	HLA-B, HLA-DRA, HLA-A, HLA-DPA1	507	20	19256	7.59606	1	0.291844	0.283361
GOTERM_BP_DIRECT	GO:0002523~leukocyte migration involved in inflammatory response	4	0.779727	0.00648447	ITGB2, S100A9, RTN4, ELANE	507	15	19256	10.1281	1	0.167322	0.162459
GOTERM_BP_DIRECT	GO:0002639~positive regulation of immunoglobulin production	4	0.779727	0.0330603	GPI, RBP4, PTPRC, MZB1	507	27	19256	5.62671	1	0.480122	0.466167
GOTERM_BP_DIRECT	GO:0006801~superoxide metabolic process	4	0.779727	0.0216155	SH3PXD2B, CYBB, CYBA, SOD2	507	23	19256	6.60527	1	0.365818	0.355186
GOTERM_BP_DIRECT	GO:0006956~complement activation	4	0.779727	0.0270127	C7, CFHR1, C9, CFP	507	25	19256	6.07684	1	0.410877	0.398935
GOTERM_BP_DIRECT	GO:0007035~vacuolar acidification	4	0.779727	0.0216155	ATP6V1A, CLIC4, ATP6V1B2, ATP6V0D1	507	23	19256	6.60527	1	0.365818	0.355186
GOTERM_BP_DIRECT	GO:0009314~response to radiation	4	0.779727	0.0470699	CXCL12, ITGB3, TXN, SOD2	507	31	19256	4.90068	1	0.597181	0.579823
GOTERM_BP_DIRECT	GO:0010259~multicellular organism aging	4	0.779727	0.0330603	COMP, CISD2, ALPL, SEC63	507	27	19256	5.62671	1	0.480122	0.466167
GOTERM_BP_DIRECT	GO:0010499~proteasomal ubiquitin-independent protein catabolic process	4	0.779727	0.0216155	PSMA5, PSMA6, PSMA2, PSMB1	507	23	19256	6.60527	1	0.365818	0.355186
GOTERM_BP_DIRECT	GO:0018401~peptidyl-proline hydroxylation to 4-hydroxy-L-proline	4	0.779727	0.00254266	ERO1A, P4HA1, P4HA2, P4HB	507	11	19256	13.811	0.999362	0.0825652	0.0801653
GOTERM_BP_DIRECT	GO:0030048~actin filament-based movement	4	0.779727	0.0109703	MYO1B, ACTC1, MYO6, MYH9	507	18	19256	8.44006	1	0.240184	0.233203
GOTERM_BP_DIRECT	GO:0030050~vesicle transport along actin filament	4	0.779727	0.0127771	MYO1D, MYO1B, MYO6, MYO1G	507	19	19256	7.99585	1	0.267579	0.259801
GOTERM_BP_DIRECT	GO:0030195~negative regulation of blood coagulation	4	0.779727	0.00528971	VTN, PROS1, APOE, KNG1	507	14	19256	10.8515	1	0.146993	0.142721
GOTERM_BP_DIRECT	GO:0030500~regulation of bone mineralization	4	0.779727	0.019162	COMP, AHSG, OMD, ENPP1	507	22	19256	6.9055	1	0.34184	0.331904
GOTERM_BP_DIRECT	GO:0030866~cortical actin cytoskeleton organization	4	0.779727	0.0470699	EPB41, EPB41L2, LCP1, CALR	507	31	19256	4.90068	1	0.597181	0.579823
GOTERM_BP_DIRECT	GO:0031639~plasminogen activation	4	0.779727	0.00254266	FGB, FGA, FGG, PGK1	507	11	19256	13.811	0.999362	0.0825652	0.0801653
GOTERM_BP_DIRECT	GO:0033591~response to L-ascorbic acid	4	0.779727	0.000583446	SPARC, GSTP1, CAT, SOD2	507	7	19256	21.703	0.814861	0.0312252	0.0303176
GOTERM_BP_DIRECT	GO:0033622~integrin activation	4	0.779727	0.00188582	CXCL12, MZB1, FERMT2, FERMT3	507	10	19256	15.1921	0.995726	0.0681254	0.0661452
GOTERM_BP_DIRECT	GO:0042157~lipoprotein metabolic process	4	0.779727	0.019162	APP, APOA2, APOA1, APOE	507	22	19256	6.9055	1	0.34184	0.331904
GOTERM_BP_DIRECT	GO:0042554~superoxide anion generation	4	0.779727	0.0242325	SH3PXD2B, CYBB, CYBA, SOD2	507	24	19256	6.33005	1	0.39566	0.38416
GOTERM_BP_DIRECT	GO:0043277~apoptotic cell clearance	4	0.779727	0.0147437	ITGB3, ITGAV, MFGE8, TGM2	507	20	19256	7.59606	1	0.291844	0.283361
GOTERM_BP_DIRECT	GO:0045055~regulated exocytosis	4	0.779727	0.0168716	RAB10, RAB31, SYNGR2, MYH9	507	21	19256	7.23434	1	0.322906	0.313521
GOTERM_BP_DIRECT	GO:0045730~respiratory burst	4	0.779727	0.00932118	PGAM1, RAC2, CYBB, CYBA	507	17	19256	8.93654	1	0.215506	0.209242
GOTERM_BP_DIRECT	GO:0045780~positive regulation of bone resorption	4	0.779727	0.019162	TF, TFRC, ITGB3, SPP1	507	22	19256	6.9055	1	0.34184	0.331904
GOTERM_BP_DIRECT	GO:0046686~response to cadmium ion	4	0.779727	0.0363257	GPI, SPARC, CAT, SOD2	507	28	19256	5.42575	1	0.51971	0.504604
GOTERM_BP_DIRECT	GO:0050665~hydrogen peroxide biosynthetic process	4	0.779727	0.00188582	ACOX1, CYBB, CYBA, SOD2	507	10	19256	15.1921	0.995726	0.0681254	0.0661452
GOTERM_BP_DIRECT	GO:0051258~protein polymerization	4	0.779727	0.00648447	FGB, FGA, VTN, FGG	507	15	19256	10.1281	1	0.167322	0.162459
GOTERM_BP_DIRECT	GO:0061640~cytoskeleton-dependent cytokinesis	4	0.779727	0.019162	SEPTIN2, SEPTIN9, SEPTIN11, SEPTIN7	507	22	19256	6.9055	1	0.34184	0.331904
GOTERM_BP_DIRECT	GO:0071354~cellular response to interleukin-6	4	0.779727	0.019162	PTGIS, FGG, CAMP, ICAM1	507	22	19256	6.9055	1	0.34184	0.331904
GOTERM_BP_DIRECT	GO:0071786~endoplasmic reticulum tubular network organization	4	0.779727	0.00254266	RAB10, RTN3, RTN4, LNPK	507	11	19256	13.811	0.999362	0.0825652	0.0801653
GOTERM_BP_DIRECT	GO:1901798~positive regulation of signal transduction by p53 class mediator	4	0.779727	0.00134625	RPS15, RPL23, CDK5RAP3, PML	507	9	19256	16.8801	0.979622	0.0532967	0.0517476
GOTERM_BP_DIRECT	GO:1902430~negative regulation of beta-amyloid formation	4	0.779727	0.0397504	RTN3, RTN1, APOE, RTN4	507	29	19256	5.23866	1	0.54188	0.52613
GOTERM_BP_DIRECT	GO:1905920~positive regulation of CoA-transferase activity	4	0.779727	0.000915317	APOA2, APOA1, DBI, APOE	507	8	19256	18.9901	0.929099	0.0410794	0.0398854
GOTERM_BP_DIRECT	GO:2000406~positive regulation of T cell migration	4	0.779727	0.0127771	APP, CXCL12, ITGB3, CORO1A	507	19	19256	7.99585	1	0.267579	0.259801
GOTERM_BP_DIRECT	GO:2000767~positive regulation of cytoplasmic translation	4	0.779727	0.00782699	SYNCRIP, PKM, HNRNPD, HNRNPU	507	16	19256	9.49507	1	0.190084	0.184559
GOTERM_BP_DIRECT	GO:0001886~endothelial cell morphogenesis	3	0.584795	0.0443874	COL15A1, CLIC4, PLOD3	507	13	19256	8.76468	1	0.583701	0.566736
GOTERM_BP_DIRECT	GO:0006108~malate metabolic process	3	0.584795	0.0219518	FH, MDH1, ME2	507	9	19256	12.6601	1	0.365818	0.355186
GOTERM_BP_DIRECT	GO:0006739~NADP metabolic process	3	0.584795	0.0382106	G6PD, MDH1, IDH1	507	12	19256	9.49507	1	0.52585	0.510566
GOTERM_BP_DIRECT	GO:0008347~glial cell migration	3	0.584795	0.0269683	VCAN, CD9, CSPG4	507	10	19256	11.3941	1	0.410877	0.398935
GOTERM_BP_DIRECT	GO:0010873~positive regulation of cholesterol esterification	3	0.584795	0.0219518	APOA2, APOA1, APOE	507	9	19256	12.6601	1	0.365818	0.355186
GOTERM_BP_DIRECT	GO:0019430~removal of superoxide radicals	3	0.584795	0.0443874	PRDX1, SOD2, MPO	507	13	19256	8.76468	1	0.583701	0.566736
GOTERM_BP_DIRECT	GO:0019674~NAD metabolic process	3	0.584795	0.0323962	LDHB, LDHA, MDH1	507	11	19256	10.3583	1	0.475254	0.46144
GOTERM_BP_DIRECT	GO:0019732~antifungal humoral response	3	0.584795	0.0382106	APP, CAMP, LTF	507	12	19256	9.49507	1	0.52585	0.510566
GOTERM_BP_DIRECT	GO:0030042~actin filament depolymerization	3	0.584795	0.0443874	GSN, WDR1, DSTN	507	13	19256	8.76468	1	0.583701	0.566736
GOTERM_BP_DIRECT	GO:0031204~posttranslational protein targeting to membrane, translocation	3	0.584795	0.0173728	SEC61A1, HSPA5, SEC63	507	8	19256	14.2426	1	0.323918	0.314503
GOTERM_BP_DIRECT	GO:0032873~negative regulation of stress-activated MAPK cascade	3	0.584795	0.0173728	QARS1, GSTP1, PPIA	507	8	19256	14.2426	1	0.323918	0.314503
GOTERM_BP_DIRECT	GO:0032963~collagen metabolic process	3	0.584795	0.0443874	TNXB, PLOD3, P3H1	507	13	19256	8.76468	1	0.583701	0.566736
GOTERM_BP_DIRECT	GO:0033700~phospholipid efflux	3	0.584795	0.0382106	APOA2, APOA1, APOE	507	12	19256	9.49507	1	0.52585	0.510566
GOTERM_BP_DIRECT	GO:0034101~erythrocyte homeostasis	3	0.584795	0.0269683	GPI, PRDX1, HMOX1	507	10	19256	11.3941	1	0.410877	0.398935
GOTERM_BP_DIRECT	GO:0034380~high-density lipoprotein particle assembly	3	0.584795	0.0382106	APOA2, APOA1, APOE	507	12	19256	9.49507	1	0.52585	0.510566
GOTERM_BP_DIRECT	GO:0034384~high-density lipoprotein particle clearance	3	0.584795	0.0132584	APOA2, APOA1, APOE	507	7	19256	16.2773	1	0.269837	0.261994
GOTERM_BP_DIRECT	GO:0043534~blood vessel endothelial cell migration	3	0.584795	0.0382106	MYH9, CYP1B1, APOA1	507	12	19256	9.49507	1	0.52585	0.510566
GOTERM_BP_DIRECT	GO:0046598~positive regulation of viral entry into host cell	3	0.584795	0.0382106	LGALS1, BSG, P4HB	507	12	19256	9.49507	1	0.52585	0.510566
GOTERM_BP_DIRECT	GO:0046931~pore complex assembly	3	0.584795	0.0323962	CCT3, ADAM10, CCT8	507	11	19256	10.3583	1	0.475254	0.46144
GOTERM_BP_DIRECT	GO:0051156~glucose 6-phosphate metabolic process	3	0.584795	0.0269683	GPI, HK3, G6PD	507	10	19256	11.3941	1	0.410877	0.398935
GOTERM_BP_DIRECT	GO:0051693~actin filament capping	3	0.584795	0.0382106	SPTA1, GSN, SPTB	507	12	19256	9.49507	1	0.52585	0.510566
GOTERM_BP_DIRECT	GO:0051873~killing by host of symbiont cells	3	0.584795	0.0269683	GAPDH, CAMP, PF4	507	10	19256	11.3941	1	0.410877	0.398935
GOTERM_BP_DIRECT	GO:0051918~negative regulation of fibrinolysis	3	0.584795	0.0443874	VTN, CPB2, PLG	507	13	19256	8.76468	1	0.583701	0.566736
GOTERM_BP_DIRECT	GO:0061097~regulation of protein tyrosine kinase activity	3	0.584795	0.00399217	RAP2B, PTPRC, ITGB3	507	4	19256	28.4852	0.99999	0.117728	0.114306
GOTERM_BP_DIRECT	GO:0070934~CRD-mediated mRNA stabilization	3	0.584795	0.0323962	SYNCRIP, HNRNPD, HNRNPU	507	11	19256	10.3583	1	0.475254	0.46144
GOTERM_BP_DIRECT	GO:0071787~endoplasmic reticulum tubular network formation	3	0.584795	0.00399217	RTN3, ARL6IP1, RTN4	507	4	19256	28.4852	0.99999	0.117728	0.114306
GOTERM_BP_DIRECT	GO:0072378~blood coagulation, fibrin clot formation	3	0.584795	0.0132584	FGB, FGA, FGG	507	7	19256	16.2773	1	0.269837	0.261994
GOTERM_BP_DIRECT	GO:0090277~positive regulation of peptide hormone secretion	3	0.584795	0.0269683	FGB, FGA, FGG	507	10	19256	11.3941	1	0.410877	0.398935
GOTERM_BP_DIRECT	GO:0099072~regulation of postsynaptic specialization membrane neurotransmitter receptor levels	3	0.584795	0.0323962	YWHAE, CTNND1, FLOT2	507	11	19256	10.3583	1	0.475254	0.46144
GOTERM_BP_DIRECT	GO:1900152~negative regulation of nuclear-transcribed mRNA catabolic process, deadenylation-dependent decay	3	0.584795	0.0219518	SYNCRIP, HNRNPD, HNRNPU	507	9	19256	12.6601	1	0.365818	0.355186
GOTERM_BP_DIRECT	GO:1900426~positive regulation of defense response to bacterium	3	0.584795	0.0173728	SIGLEC16, GRN, CYBA	507	8	19256	14.2426	1	0.323918	0.314503

## Sheet: C-A(CC)
Category	Term	Count	%	PValue	Genes	List Total	Pop Hits	Pop Total	Fold Enrichment	Bonferroni	Benjamini	FDR
GOTERM_CC_DIRECT	GO:0070062~extracellular exosome	289	56.3353	1.67411e-145	APP, RPL30, RPL3, TFRC, RPL31, COL12A1, SLC4A1, ENO1, ICAM1, PSMD7, LGALS1, DPYSL2, FTH1, BSG, NAMPT, CPNE3, RPS11, PRKCB, SERPINF1, RPL23, OMD, HLA-B, P3H1, HLA-A, HSPG2, SND1, MYL6, RBP4, PPA1, RPL24, TAGLN2, VDAC1, EZR, ATP6V0D1, RPL28, ALDH7A1, AARS1, ENPEP, ENDOD1, TXN, THY1, IQGAP2, ADH5, GLG1, LDHB, NCSTN, LDHA, SYNGR2, C7, C9, PRDX1, EPB41L2, MYO6, APOE, A2M, IGHA1, ELANE, VASP, GSTM3, GN…	512	2218	20472	5.20987	1.01619e-142	1.01619e-142	8.1864e-143
GOTERM_CC_DIRECT	GO:0005829~cytosol	248	48.3431	2.80817e-26	APP, RPL30, RPL3, RPL32, ARL6IP1, RPL31, RTCB, HNRNPU, ENO1, SMC3, RPL8, RPL9, UBE2L3, RPS15, RPS6KA3, PSMD7, LGALS1, TFG, SCP2, DPYSL2, FTH1, MAGOH, DPYSL3, NAMPT, LONP1, RPL38, CPNE3, RPS11, CDK5RAP3, SKP1, PRKCB, RPL23, ANK1, SND1, EML4, MYL6, CARHSP1, PPA1, CD109, RPL24, TAGLN2, RPL29, EZR, RPL28, ALDH7A1, AARS1, EPB41, ENDOD1, TXN, THY1, IQGAP2, ADH5, LDHB, LDHA, PRDX1, EPB41L2, MYO6, S100A1…	512	5477	20472	1.8105	1.70456e-23	2.43509e-24	1.96171e-24
GOTERM_CC_DIRECT	GO:0005737~cytoplasm	208	40.5458	3.14142e-11	APP, RPL30, SPARC, RPL3, RPL32, RPL31, RTCB, ENO1, RPL8, RPL9, UBE2L3, RPS15, RPS6KA3, LGALS1, TFG, SCP2, DPYSL2, FTH1, MAGOH, DPYSL3, NAMPT, RPL38, CPNE3, RPS11, CDK5RAP3, SKP1, PRKCB, RPL23, CLEC11A, RECQL, P3H1, SND1, EML4, CARHSP1, PPA1, RPL24, RPL29, EZR, RPL28, AARS1, ENPEP, TXN, IQGAP2, LDHB, LDHA, PRDX1, MYO6, S100A13, MAP4, APOE, ELANE, SEC31A, VASP, GSTM3, RPS26, HNRNPL, BST2, EHD1, COL…	512	5570	20472	1.49313	1.90684e-08	1.19178e-09	9.60097e-10
GOTERM_CC_DIRECT	GO:0016020~membrane	182	35.4776	3.70522e-42	ERO1A, APP, RPL30, SPARC, RPL32, TFRC, ARL6IP1, RPL31, ITGA2B, TNC, CISD2, HNRNPU, ENO1, RPL8, IPO7, RPL9, ICAM1, ACTG1, RPS15, PSMD7, APMAP, LAMP1, SCP2, DPYSL2, LAMP2, ARHGDIB, BSG, LONP1, RPS11, SLC16A3, CDK5RAP3, SEC63, CPT1A, G6PD, RPL23, HLA-B, RECQL, ANXA11, ADAM10, P3H1, RPSA, CYBA, HLA-A, HSPG2, ILF2, ANK1, SND1, EML4, EEF1A1, RAB32, ILF3, MYL6, DNAJB11, RPL24, VDAC1, EZR, RPL29, ATP6V0D…	512	2547	20472	2.85715	2.24907e-39	1.12453e-39	9.05926e-40
GOTERM_CC_DIRECT	GO:0005886~plasma membrane	178	34.6979	2.61255e-07	APP, SPARC, TFRC, PROS1, ITGA2B, CTNND1, HDLBP, SLC4A1, C4BPA, PARK7, C4BPB, ENO1, ICAM1, ACTG1, LAMP1, DPYSL2, LAMP2, NAMPT, BSG, CAPN2, ENPP1, PLS3, CPNE3, SLC16A3, TGM2, CD93, PRKCB, STX7, HLA-B, CYBB, ADAM10, RPSA, CYBA, HLA-A, HSPG2, ANK1, PDIA6, SDHB, EEF1A1, RAB31, TMX3, STIM1, CD109, PRTN3, VDAC1, EZR, S100A9, ARL8A, ATP6V1A, RTN3, ENPEP, EPB42, EPB41, COPB1, GLO1, SLC1A5, THY1, IQGAP2, C…	512	5066	20472	1.4049	0.000158569	6.34326e-06	5.11014e-06
GOTERM_CC_DIRECT	GO:0005576~extracellular region	154	30.0195	2.27684e-35	APP, SPARC, TFRC, PROS1, COL12A1, TNC, C4BPA, C4BPB, EPX, MPO, COMP, PSMD7, LGALS1, FTH1, ENPP1, OSTF1, HABP2, SERPINF1, OMD, CLEC11A, PCOLCE, HSPG2, ILF2, EEF1A1, ILF3, RBP4, OPTC, CD109, PRTN3, TAGLN2, PPIA, S100A9, FTL, CPB2, ENDOD1, TXN, THY1, AEBP1, CFP, FBLN2, LTBP1, KNG1, HSP90B1, CNN2, VTN, C7, C9, PSAP, S100A13, APOE, A2M, IGHA1, ELANE, CD163, IDH1, DEFA3, PRG4, CYRIB, LYZ, CP, COL1A1, T…	512	2127	20472	2.89497	1.38204e-32	3.4551e-33	2.78343e-33
GOTERM_CC_DIRECT	GO:0005615~extracellular space	143	27.8752	1.81871e-33	ERO1A, APP, SPARC, TFRC, PROS1, COL12A1, TNC, PLOD3, C4BPA, C4BPB, ENO1, EPX, MPO, ICAM1, ACTG1, COMP, LGALS1, FCGRT, DPYSL3, LAMP2, NAMPT, ENPP1, HABP2, SERPINF1, OMD, CLEC11A, PCOLCE, HSPG2, PDIA6, EEF1A1, RBP4, CD109, DNAJB11, PRTN3, EZR, PPIA, S100A9, RTN3, COPA, CPB2, DPT, AEBP1, CFP, KNG1, VTN, C7, PRDX1, C9, PSAP, CHAD, APOF, SERPINH1, PGK1, S100A13, HMOX1, APOE, A2M, IGHA1, ELANE, DEFA3, …	512	1936	20472	2.95339	1.10395e-30	2.20791e-31	1.77869e-31
GOTERM_CC_DIRECT	GO:0005783~endoplasmic reticulum	76	14.8148	1.27304e-14	ERO1A, FKBP10, APP, ATP2A3, PLOD3, CISD2, ATP2A2, DBI, HNRNPR, PARK7, ELAVL1, SEC61A1, SYNCRIP, SCP2, CAPN2, TGM2, SEC63, TMED4, FGB, FGA, TMED9, PTGIS, HLA-B, P3H1, RPS3A, HLA-A, PDIA6, CKAP4, EEF1G, RAB32, RCN3, TMX3, STIM1, EEF1D, DNAJB11, CANX, CAT, RPL24, FKBP7, FKBP9, RTN3, LRRC59, GRN, RTN1, USO1, RRBP1, THY1, HSD17B11, MESD, RTN4, HSP90B1, VTN, NCSTN, SERPINH1, HMOX1, APOE, UGGT1, LNPK, S…	512	1142	20472	2.66096	7.74991e-12	6.43946e-13	5.18764e-13
GOTERM_CC_DIRECT	GO:0005925~focal adhesion	71	13.8402	3.41871e-37	ITGB1, YWHAE, RPL30, RPL3, RPL31, ITGB3, ITGA2B, FHL1, ITGB2, GDI2, TNC, HSPB1, RPL8, RPL9, ICAM1, ACTG1, MRC2, RPS4X, RPS15, LASP1, CSRP1, YWHAQ, BSG, CAPN2, FLOT1, RAC2, FLOT2, RPL38, CPNE3, ITGAV, RPS11, TGM2, CAP1, RPL23, RHOG, ADAM10, RPS3A, CYBA, HSPG2, CTTN, CAT, MYH9, ITGA6, LCP1, EZR, PPIA, AHNAK, THY1, ADD1, HSP90B1, CNN3, CNN2, NCSTN, EPB41L2, CTNNA1, PACSIN2, FLNB, CD59, RPS2, VASP, G…	512	424	20472	6.6955	2.07516e-34	6.91719e-35	5.5725e-35
GOTERM_CC_DIRECT	GO:0005739~mitochondrion	59	11.501	0.000203284	APP, CLIC4, ACAA2, TFRC, PARK7, ALDH1L2, HK3, ABHD10, CHCHD3, HINT2, SCP2, CPT2, BSG, LONP1, RACK1, CYP1B1, CPNE3, ME2, TGM2, CPT1A, ATAD3A, SDHB, RAB32, ILF3, PKM, TST, DDAH2, GPD2, CAT, AGPS, NDUFS1, VDAC1, HAGH, UQCRC2, ALDH7A1, SLC25A13, AARS1, FH, GSTP1, TIMM9, DDX1, HSD17B10, ADH5, HSPD1, ACAT1, NCSTN, PITRM1, OXCT1, PCK2, BCAP31, HSPA5, IDH1, CYRIB, SOD2, GARS1, ALDH6A1, P4HA1, SFXN3, ACO1	512	1437	20472	1.64167	0.116095	0.00184169	0.00148367
GOTERM_CC_DIRECT	GO:0005788~endoplasmic reticulum lumen	58	11.306	3.02427e-33	ERO1A, FKBP10, APP, COL14A1, COL12A1, SERPINA10, TNC, PLOD3, DBI, LGALS1, FGA, AHSG, FGG, GPX8, APOA2, P3H1, APOA1, ADAM10, CNPY3, PDIA6, CKAP4, RCN3, VCAN, COL2A1, F9, COL6A2, COL6A1, DNAJB11, CANX, MZB1, COL6A3, FKBP7, VWA1, MFGE8, COL15A1, SERPINC1, CFP, LTBP1, KNG1, HSP90B1, TGOLN2, GANAB, SPP1, SERPINH1, SPP2, APOE, UGGT1, HSPA5, ERAP1, CP, COL1A1, TF, COL5A1, P4HA1, P4HA2, COL5A2, P4HB, CALR	512	306	20472	7.57874	1.83573e-30	3.05955e-31	2.46478e-31
GOTERM_CC_DIRECT	GO:0005789~endoplasmic reticulum membrane	55	10.7212	4.25801e-07	ERO1A, ARL6IP1, PROS1, RTCB, ATP2A3, PLOD3, CISD2, ATP2A2, SEC61A1, BSG, RAC2, CYP1B1, ANXA7, TMED4, TMED9, SEC13, PTGIS, RHOG, HLA-B, CYBB, CYBA, HLA-A, PDIA6, CKAP4, TMX3, STIM1, CANX, COPB2, RTN3, LRRC59, COPA, SEC23A, RTN1, COPB1, RTN4, HSP90B1, NCSTN, HMOX1, CD59, LNPK, SEC31A, BCAP31, HSPA5, ATP13A1, ERAP1, ARCN1, RAB10, DHRS7, NCEH1, TBXAS1, ALOX5AP, TMEM119, COPG1, CALR, STT3B	512	1052	20472	2.09044	0.000258428	8.61538e-06	6.94056e-06
GOTERM_CC_DIRECT	GO:0009986~cell surface	54	10.5263	1.61802e-14	ITGB1, IGHM, APP, CLIC4, SPARC, ITGAM, TFRC, ITGB3, ITGA2B, ITGB2, HNRNPU, ENO1, ICAM1, LGALS1, APMAP, ENPP1, ITGAV, CTSG, LBP, HLA-DPA1, FGB, FGA, CD93, FGG, HLA-B, BGN, APOA1, ADAM10, HLA-A, SPTB, TMX3, CD109, ITGA6, LTF, USP14, CD63, PLG, SLC3A2, THY1, IQGAP2, HSPD1, NT5E, CD59, NCAM1, ELANE, AOC3, HSPA5, BST2, TF, PTPRC, HLA-DRA, CSPG4, CALR, FERMT2	512	638	20472	3.38426	9.83902e-12	7.55492e-13	6.08626e-13
GOTERM_CC_DIRECT	GO:0043231~intracellular membrane-bounded organelle	48	9.35673	1.56502e-05	ATP6V1A, ERO1A, CD63, SPARC, TFRC, COPB1, HEXA, RTCB, CISD2, MPO, VTN, GANAB, SCP2, TFG, LAMP2, PSAP, BSG, CTNNA1, PACSIN2, RAC2, CYP1B1, FLOT2, CTSG, ME2, CDK5RAP3, SEC31A, HLA-DPA1, RAB8B, G6PD, SEC13, HSPA5, RHOG, SMARCA5, ADAM10, RAB10, BST2, RCN3, EHD1, MYBBP1A, CTTN, P4HA1, P4HA2, CAT, ATP6V1B2, PRTN3, MNDA, GAPDH, PPIA	512	982	20472	1.95443	0.00945477	0.00019791	0.000159436
GOTERM_CC_DIRECT	GO:0048471~perinuclear region of cytoplasm	44	8.577	6.18717e-07	ITGB1, APP, CLIC4, SEC23A, TFRC, USO1, HMGB2, AKR1B1, ATP2A2, PARK7, NDRG1, HSP90B1, LAMP1, LAMP2, MYO6, S100A13, RACK1, SPP1, FLOT2, HMOX1, TGM2, SEC31A, CTSB, RAB8B, GSN, FUS, SEPTIN2, SERPINF1, STX7, NME2, M6PR, SEPTIN9, CKAP4, RAB10, HNRNPL, EHD1, MYO1B, TF, SERBP1, CTNNB1, LCP1, CALR, EZR, GAPDH	512	763	20472	2.30578	0.000375491	1.17363e-05	9.45476e-06
GOTERM_CC_DIRECT	GO:0032991~macromolecular complex	41	7.9922	1.23581e-06	APP, RPL3, EPB41, ITGB3, HMGB2, CISD2, ATP2A2, HNRNPU, CORO1A, LTBP1, HSPD1, HSP90B1, COMP, SCP2, YWHAQ, QARS1, DPYSL2, UGGT1, CDK5RAP3, GSN, HSPA5, RPL23, TUBB, P3H1, SPTB, RBP4, CFHR1, COL6A2, COL6A1, CAT, CANX, UBE2N, PECAM1, MYH9, CTNNB1, CD9, P4HB, STT3B, EZR, PPIA, LTF	512	703	20472	2.33195	0.000749857	2.14325e-05	1.72661e-05
GOTERM_CC_DIRECT	GO:0005856~cytoskeleton	36	7.01754	3.15224e-07	EPB42, EPB41, HSPB1, CORO1A, SEPTIN11, GLG1, ADD1, ACTG1, CNN3, ADD2, CNN2, DPYSL2, EPB41L2, ARHGDIB, CTNNA1, PACSIN2, RAC2, CCT3, VASP, TUBB, RHOG, TUBB4B, SEPTIN9, ANK1, CKAP4, SEPTIN7, RAB10, EML4, CTTN, FSCN1, TAGLN2, ALDOC, P4HB, EZR, S100A9, FERMT2	512	541	20472	2.6607	0.000191323	7.08671e-06	5.70907e-06
GOTERM_CC_DIRECT	GO:0031012~extracellular matrix	33	6.43275	9.08198e-14	LRRC15, COL15A1, TNXB, COL14A1, PRELP, LTBP1, FBLN2, CPN2, GLG1, COMP, ACAN, CHAD, APOE, TGM2, AHSG, LUM, BGN, DCN, ASPN, COL1A1, VCAN, COL2A1, COL5A1, OPTC, COL6A2, COL5A2, COL6A1, OGN, COL6A3, ALPL, TGFBI, FMOD, MATN2	512	259	20472	5.09453	5.51255e-11	3.93769e-12	3.17221e-12
GOTERM_CC_DIRECT	GO:0009897~external side of plasma membrane	30	5.84795	4.54807e-06	ITGB1, IGHM, ENPEP, ITGAM, TFRC, ITGB3, ITGA2B, ITGB2, THY1, ICAM1, NT5E, LAMP1, FCGRT, FLOT1, CAPN2, NCAM1, ITGAV, IGHA1, CTSB, FGB, FGA, CD163, FGG, PTPRC, CXCL12, CD9, ITGA6, P4HB, CALR, MFGE8	512	456	20472	2.63055	0.00275688	6.73336e-05	5.42441e-05
GOTERM_CC_DIRECT	GO:0072562~blood microparticle	30	5.84795	2.51537e-18	APCS, IGHM, TFRC, SERPINC1, PROS1, ITGA2B, SLC2A1, C4BPA, PLG, SLC4A1, ITIH1, CPN2, KNG1, ACTG1, VTN, C9, APOE, A2M, IGHA1, FGB, FGA, GSN, AHSG, FGG, APOA2, APOA1, CP, TF, ACTC1, CFHR1	512	145	20472	8.27263	1.52683e-15	1.69647e-16	1.36668e-16
GOTERM_CC_DIRECT	GO:0042470~melanosome	27	5.26316	3.0106e-19	ITGB1, YWHAE, CD63, AHCY, TFRC, ITGB3, SLC2A1, SLC3A2, SLC1A5, HSP90B1, GANAB, NCSTN, LAMP1, PRDX1, BSG, FLOT1, CTSB, GSN, HSPA5, SERPINF1, ANXA11, PDIA6, SND1, RAB32, CANX, ATP6V1B2, P4HB	512	103	20472	10.4813	1.82743e-16	2.28429e-17	1.84023e-17
GOTERM_CC_DIRECT	GO:1904813~ficolin-1-rich granule lumen	26	5.06823	4.56201e-16	CSTB, GPI, GSTP1, HK3, PSMD7, FTH1, PSMB1, CCT8, OSTF1, PGM1, CTSB, GSN, IDH1, PGAM1, NME2, ILF2, MMP9, PSMA5, EEF1A1, PKM, PSMA2, IMPDH2, CAT, ALDOC, MNDA, PPIA	512	124	20472	8.38382	2.69562e-13	2.5174e-14	2.02802e-14
GOTERM_CC_DIRECT	GO:0034774~secretory granule lumen	26	5.06823	6.91773e-17	CSTB, GPI, GSTP1, GDI2, EPX, HK3, PSMD7, PSMB1, CCT8, OSTF1, GSN, AHSG, IDH1, PGAM1, NME2, APOA1, PSMA5, EEF1A1, TF, PKM, PSMA2, IMPDH2, CAT, ALDOC, S100A9, PPIA	512	115	20472	9.03995	6.73905e-14	4.19906e-15	3.38277e-15
GOTERM_CC_DIRECT	GO:0000139~Golgi membrane	25	4.87329	0.0356988	ATP6V1A, RTN3, COPB2, COPA, SEC23A, RTN1, COPB1, PROS1, USO1, SLC2A1, GLG1, NCSTN, BSG, CD59, NCAM1, HLA-DPA1, BCAP31, TMED9, HLA-B, ADAM10, HLA-A, ARCN1, RAB10, HLA-DRA, COPG1	512	648	20472	1.54261	1	0.145431	0.117159
GOTERM_CC_DIRECT	GO:0005765~lysosomal membrane	25	4.87329	2.4953e-05	ATP6V1A, CD63, GRN, ENPEP, AHNAK, SLC3A2, NCSTN, LAMP1, LAMP2, PSAP, MYO6, FLOT1, ENPP1, HLA-DPA1, SEC13, STX7, HLA-B, M6PR, HLA-A, CP, COL6A1, ATP6V1B2, HLA-DRA, ATP6V0D1, ARL8A	512	373	20472	2.67992	0.0150325	0.00029699	0.000239256
GOTERM_CC_DIRECT	GO:0015629~actin cytoskeleton	25	4.87329	3.60907e-08	CLIC4, WDR1, AHNAK, IQGAP2, CORO1A, CNN3, SPTA1, MYO6, CTNNA1, FLNB, PDLIM5, VASP, GSN, SEPTIN2, DSTN, SEPTIN9, SPTB, H1-0, MYO1D, MYO1B, FSCN1, MYH9, LCP1, EZR, MYO1G	512	258	20472	3.87445	2.19068e-05	9.95774e-07	8.02197e-07
GOTERM_CC_DIRECT	GO:0045202~synapse	24	4.67836	0.00285683	FGB, RTN3, USP14, APP, RPL3, ITGB3, GDI2, AKR1A1, RPS3A, SLC3A2, RPS15, RPS4X, RPS6KA3, FABP5, YWHAQ, DPYSL3, HNRNPD, RPL24, CTNNB1, VDAC1, RPL38, ARL8A, RPS23, EIF3B	512	488	20472	1.96644	0.823878	0.0174514	0.0140589
GOTERM_CC_DIRECT	GO:0045121~membrane raft	23	4.48343	3.77041e-07	ITGB1, APP, AHNAK, TUBB, PARK7, THY1, HSPD1, ICAM1, BST2, LDHB, TUBA1B, TUBA1A, RAP2B, PTPRC, BSG, LAMP2, FLOT1, SERPINH1, PGK1, PECAM1, CAPN2, CSK, VDAC1	512	251	20472	3.66391	0.000228838	8.12347e-06	6.54428e-06
GOTERM_CC_DIRECT	GO:0005769~early endosome	22	4.2885	3.44e-05	AOC3, APP, TFRC, STX7, DYSF, APOA2, APOA1, CORO1A, HSPD1, MYO1D, RAB32, EHD1, EEA1, TF, MYO1B, NCSTN, RAB31, FLOT1, PACSIN2, APOE, ATP6V0D1, LTF	512	308	20472	2.85603	0.0206646	0.000391551	0.000315434
GOTERM_CC_DIRECT	GO:0005759~mitochondrial matrix	21	4.09357	0.00202792	FH, ACAA2, PARK7, SOD2, ALDH1L2, HSD17B10, HSPD1, ACAT1, GARS1, ALDH6A1, ABHD10, PITRM1, QARS1, TST, OXCT1, LONP1, NDUFS1, ME2, HAGH, ALDH7A1, PCK2	512	390	20472	2.153	0.708349	0.0129573	0.0104384
GOTERM_CC_DIRECT	GO:0005840~ribosome	21	4.09357	1.6399e-08	RPL3, RPL32, RPL31, RPL23, RPS3A, RRBP1, RPL8, RPL9, RPS15, RPS4X, RPS26, RPS6KA3, RPL27A, CANX, RPL24, RPL38, RPS2, RPL29, RPS11, RPL28, RPS23	512	175	20472	4.79812	9.95417e-06	4.7401e-07	3.81863e-07
GOTERM_CC_DIRECT	GO:0016324~apical plasma membrane	19	3.7037	0.0063605	ATP6V1A, ENPEP, ITGB3, SLC2A1, AKR1A1, SLC3A2, CYBA, THY1, SEPTIN7, BST2, TF, ATP6V1B2, CD9, CSPG4, EZR, ATP6V0D1, SLC16A3, PFKM, CTSB	512	374	20472	2.03129	0.979207	0.0324439	0.0261368
GOTERM_CC_DIRECT	GO:0098978~glutamatergic synapse	19	3.7037	0.00619778	ITGB1, YWHAE, ARF4, SPARC, ITGB3, CTNND1, ADAM10, PLG, ELAVL1, CORO1A, NDRG1, SEPTIN11, ACAN, ACTC1, CANX, FLOT1, PACSIN2, FLOT2, APOE	512	373	20472	2.03674	0.977034	0.0321543	0.0259036
GOTERM_CC_DIRECT	GO:0031982~vesicle	19	3.7037	3.88106e-07	DCTN2, AHNAK, GSTP1, STX7, GDI2, MYO1D, TF, MYO1B, MYL6, PKM, MYO6, SPP1, FLOT2, CD59, TAGLN2, EZR, GAPDH, PPIA, MYO1G	512	174	20472	4.36611	0.000235553	8.12347e-06	6.54428e-06
GOTERM_CC_DIRECT	GO:0022626~cytosolic ribosome	19	3.7037	4.41023e-13	RPL30, RPL3, RPL32, RPL31, RPL23, RPS3A, RPSA, RPL8, RPL9, RPS15, RPS4X, RPL27A, RPL24, RPL38, RPS2, RPL29, RPS11, RPL28, RPS23	512	77	20472	9.86627	2.67675e-10	1.78467e-11	1.43774e-11
GOTERM_CC_DIRECT	GO:0030027~lamellipodium	18	3.50877	6.92332e-06	ITGB1, VASP, GSN, CTNND1, NME2, IQGAP2, CORO1A, ACTC1, CTTN, DPYSL3, FSCN1, FLOT1, CTNNA1, RAC2, FLOT2, CTNNB1, P4HB, MYO1G	512	192	20472	3.74854	0.00419365	0.000100059	8.06073e-05
GOTERM_CC_DIRECT	GO:1990904~ribonucleoprotein complex	18	3.50877	7.2636e-07	HNRNPA3, DDX1, HNRNPU, RPS3A, HNRNPR, ELAVL1, ILF2, RPS4X, HNRNPL, SYNCRIP, ILF3, EPRS1, HNRNPH1, HNRNPA2B1, HNRNPD, HNRNPH3, HNRNPA1, GAPDH	512	163	20472	4.41545	0.000440803	1.33606e-05	1.07633e-05
GOTERM_CC_DIRECT	GO:0005796~Golgi lumen	18	3.50877	1.09501e-09	ERO1A, APP, LUM, PROS1, OMD, BGN, DEFA3, PRELP, HSPG2, DCN, ACAN, VTN, VCAN, F9, OGN, BPNT2, CSPG4, FMOD	512	106	20472	6.7898	6.64673e-07	3.69263e-08	2.97479e-08
GOTERM_CC_DIRECT	GO:0005874~microtubule	17	3.31384	0.00823589	CCT3, DCTN2, TUBB, IQGAP2, TUBB4B, SEPTIN9, NDRG1, EML4, TUBB8, TUBA1B, TUBB2B, TUBA1A, STIM1, DPYSL2, MAP4, CCT8, CDK5RAP3	512	326	20472	2.08507	0.993395	0.0406438	0.0327427
GOTERM_CC_DIRECT	GO:0005768~endosome	17	3.31384	0.0063294	APP, GRN, TFRC, STX7, DYSF, M6PR, CYBA, MYO1D, RAB10, TGOLN2, BSG, FLOT1, PACSIN2, FLOT2, PLIN3, EZR, RAB8B	512	317	20472	2.14427	0.978808	0.0324439	0.0261368
GOTERM_CC_DIRECT	GO:0010008~endosome membrane	17	3.31384	0.000660046	ITGB1, ATP6V1A, CD63, SUN2, TFRC, HLA-B, HLA-A, EHD1, TF, MYO1B, NCSTN, LAMP1, FCGRT, HLA-DRA, PLIN3, ATP6V0D1, HLA-DPA1	512	253	20472	2.6867	0.330203	0.00507149	0.0040856
GOTERM_CC_DIRECT	GO:1903561~extracellular vesicle	17	3.31384	1.91887e-06	FGB, FGA, TFRC, ITGB2, COL12A1, APOA1, PRELP, TUBB4B, FBLN2, PKM, OLFML3, COL6A2, OGN, CD9, COL6A3, APOE, MFGE8	512	156	20472	4.35727	0.00116408	3.14799e-05	2.53602e-05
GOTERM_CC_DIRECT	GO:0035578~azurophil granule lumen	17	3.31384	8.35894e-10	CAP1, PYGB, GRN, GCA, TUBB, GDI2, DEFA3, LYZ, TUBB4B, MPO, FABP5, CTSG, MNDA, PRTN3, CCT8, ELANE, FTL	512	91	20472	7.46961	5.07387e-07	2.98463e-08	2.40442e-08
GOTERM_CC_DIRECT	GO:0031410~cytoplasmic vesicle	16	3.11891	0.0170887	USP14, ENPEP, TFRC, DYSF, RHOG, APOA1, CLTA, ELAVL1, ADD2, MYO1D, TF, MYO6, ARHGDIB, FLOT1, RAC2, FLOT2	512	325	20472	1.96846	0.999971	0.078258	0.0630447
GOTERM_CC_DIRECT	GO:0030054~cell junction	16	3.11891	0.000763762	WDR1, EPB41, ITGB3, CTNND1, SPTB, RTN4, SPTA1, EPB41L2, SH3PXD2B, NAMPT, CTNNA1, CTNNB1, CPNE3, LCP1, S100A9, FERMT2	512	232	20472	2.75754	0.371098	0.0057235	0.00461086
GOTERM_CC_DIRECT	GO:0005911~cell-cell junction	16	3.11891	0.000100702	MPP1, APP, CLIC4, WDR1, ITGB3, CTNND1, CORO1A, ACTG1, CNN2, FSCN1, FLOT1, PACSIN2, PECAM1, CTNNA1, CTNNB1, CSK	512	192	20472	3.33203	0.0592984	0.000970257	0.00078164
GOTERM_CC_DIRECT	GO:0005912~adherens junction	16	3.11891	3.48332e-05	CTNND1, ADAM10, PARK7, NDRG1, ADD1, CNN3, RAB10, FLOT1, CTNNA1, FLOT2, MYH9, CTNNB1, ITGA6, EZR, PDLIM5, FERMT2	512	175	20472	3.65571	0.0209221	0.000391551	0.000315434
GOTERM_CC_DIRECT	GO:0015630~microtubule cytoskeleton	15	2.92398	0.00044953	CLIC4, SEPTIN2, TUBB, TUBB4B, SEPTIN9, NDRG1, SEPTIN11, SEPTIN7, EML4, TUBB8, TUBA1B, TUBB2B, TUBA1A, MAP4, GAPDH	512	197	20472	3.0445	0.238851	0.00373788	0.00301124
GOTERM_CC_DIRECT	GO:0005635~nuclear envelope	15	2.92398	0.000385396	SUN2, LRRC59, SEC13, CBX3, RTCB, CYBB, ANXA11, SYNE3, IPO7, RTN4, TPR, ALOX5AP, RAC2, BANF1, CALR	512	194	20472	3.09158	0.208623	0.00329487	0.00265435
GOTERM_CC_DIRECT	GO:0042995~cell projection	15	2.92398	0.000211617	VASP, WDR1, RHOG, SPTB, ASPN, RTN4, SPTA1, SH3PXD2B, SPP1, RAC2, KCTD12, EZR, PDLIM5, CAMP, FERMT3	512	183	20472	3.27741	0.120556	0.001889	0.00152178
GOTERM_CC_DIRECT	GO:0005938~cell cortex	15	2.92398	6.5964e-05	FGB, EPB41, SEPTIN2, RHOG, ENO1, CORO1A, MYO1D, CTTN, EPB41L2, MYO6, FSCN1, RAC2, CTNNB1, FLNB, FERMT2	512	164	20472	3.65711	0.0392504	0.000702458	0.000565901
GOTERM_CC_DIRECT	GO:0005764~lysosome	14	2.72904	0.0474497	GRN, TINAGL1, HEXA, STX7, MPO, LAMP1, CAT, LAMP2, PSAP, CAPN2, HLA-DRA, CTSG, CALR, CTSB	512	309	20472	1.81159	1	0.185819	0.149696
GOTERM_CC_DIRECT	GO:0014069~postsynaptic density	14	2.72904	0.0171471	RTN3, RPL30, HNRNPA3, EPB41, RPL23, ADAM10, RPL8, ADD1, RTN4, CNN3, ADD2, FABP5, RPL38, PDLIM5	512	267	20472	2.09656	0.999972	0.078258	0.0630447
GOTERM_CC_DIRECT	GO:0016323~basolateral plasma membrane	14	2.72904	0.00707985	TFRC, EPB41, SLC2A1, SLC3A2, SLC4A1, ANK1, MYO1D, BSG, FLOT1, ENPP1, FLOT2, CTNNB1, EZR, SLC16A3	512	238	20472	2.35202	0.986603	0.0355163	0.028612
GOTERM_CC_DIRECT	GO:0043202~lysosomal lumen	14	2.72904	7.65475e-07	LUM, HEXA, OMD, BGN, PRELP, HSPG2, DCN, ACAN, VCAN, OGN, LAMP2, PSAP, CSPG4, FMOD	512	96	20472	5.83105	0.000464536	1.3666e-05	1.10093e-05
GOTERM_CC_DIRECT	GO:0005581~collagen trimer	14	2.72904	4.63685e-07	COL15A1, COL14A1, COL12A1, PCOLCE, COL1A1, COL2A1, COL5A1, P4HA1, COL6A2, COL5A2, COL6A1, SERPINH1, COL6A3, CTHRC1	512	92	20472	6.08458	0.000281417	9.07925e-06	7.31426e-06
GOTERM_CC_DIRECT	GO:0031093~platelet alpha granule lumen	14	2.72904	9.30113e-09	FGB, FGA, APP, SPARC, AHSG, PROS1, FGG, PLG, CYRIB, KNG1, MMRN1, A2M, PF4, FERMT3	512	67	20472	8.35494	5.64577e-06	2.82289e-07	2.27413e-07
GOTERM_CC_DIRECT	GO:0030864~cortical actin cytoskeleton	14	2.72904	2.2214e-09	CAP1, GSN, WDR1, SLC2A1, DSTN, CORO1A, SPTB, SPTA1, EEF1A1, LASP1, CTTN, FLOT1, CAPN2, FLOT2	512	60	20472	9.32969	1.34839e-06	7.09678e-08	5.71717e-08
GOTERM_CC_DIRECT	GO:0030496~midbody	13	2.53411	0.00243507	CLIC4, RALB, HSPA5, SEPTIN2, CTNND1, SLC2A1, ANXA11, HNRNPU, SEPTIN7, HSP90B1, EML4, RACK1, ARL8A	512	185	20472	2.80971	0.772337	0.015238	0.0122758
GOTERM_CC_DIRECT	GO:0042383~sarcolemma	13	2.53411	1.34786e-05	ITGB1, AHNAK, DYSF, SLC2A1, BGN, ANK1, NCSTN, LAMP1, COL6A2, BSG, COL6A1, FLOT1, COL6A3	512	106	20472	4.90374	0.00814817	0.000177858	0.000143283
GOTERM_CC_DIRECT	GO:0030133~transport vesicle	13	2.53411	7.36463e-06	ATP6V1A, COPB2, COPA, TMED9, COPB1, USO1, M6PR, BGN, ARCN1, TGOLN2, PLIN3, CD59, COPG1	512	100	20472	5.19797	0.00446037	0.000103961	8.37513e-05
GOTERM_CC_DIRECT	GO:0030670~phagocytic vesicle membrane	13	2.53411	2.76765e-07	ANXA3, HLA-B, CYBB, CYBA, HLA-A, CORO1A, RAB32, RAB10, LAMP2, RAC2, CALR, ATP6V0D1, RAB8B	512	74	20472	7.02428	0.000167982	6.4614e-06	5.20531e-06
GOTERM_CC_DIRECT	GO:0008021~synaptic vesicle	12	2.33918	0.000659093	RAB10, APP, NCSTN, TMED9, SYNGR2, LAMP1, SEPTIN2, STX7, ADAM10, VDAC1, ATP6V0D1, RAB8B	512	137	20472	3.50228	0.329815	0.00507149	0.0040856
GOTERM_CC_DIRECT	GO:0001725~stress fiber	12	2.33918	1.85178e-06	CNN2, FSCN1, MYH9, FLNB, CYBA, LCP1, SEPTIN9, PDLIM5, FERMT2, SEPTIN11, SEPTIN7, MYH7	512	73	20472	6.57277	0.0011234	3.12231e-05	2.51534e-05
GOTERM_CC_DIRECT	GO:0022625~cytosolic large ribosomal subunit	12	2.33918	2.38901e-07	RPL30, RPL3, RPL32, RPL31, RPL23, RPL27A, RPL24, RPL38, RPL8, RPL29, RPL9, RPL28	512	60	20472	7.99688	0.000145002	6.04221e-06	4.86761e-06
GOTERM_CC_DIRECT	GO:1904724~tertiary granule lumen	12	2.33918	9.3354e-08	CNN2, CSTB, IDH1, FTH1, ALDOC, LYZ, CFP, ILF2, MMP9, PGM1, CAMP, LTF	512	55	20472	8.72386	5.66642e-05	2.46373e-06	1.98479e-06
GOTERM_CC_DIRECT	GO:0030426~growth cone	11	2.14425	0.00427765	APP, COPA, CTTN, STIM1, DCTN2, DPYSL2, DPYSL3, CTNND1, FSCN1, HNRNPR, THY1	512	149	20472	2.95187	0.925883	0.0244956	0.0197337
GOTERM_CC_DIRECT	GO:0001726~ruffle	11	2.14425	0.00021665	ITGB1, GSN, CTTN, MYO6, FSCN1, ATP6V1B2, NME2, MYH9, CSPG4, LCP1, EZR	512	101	20472	4.35473	0.123239	0.00190589	0.00153539
GOTERM_CC_DIRECT	GO:0005884~actin filament	11	2.14425	0.000119063	MYO1B, ACTC1, CTTN, MYO6, RAC2, PLS3, LCP1, GNG12, EZR, CORO1A, ACTG1	512	94	20472	4.67902	0.0697252	0.00112923	0.000909713
GOTERM_CC_DIRECT	GO:0030175~filopodium	11	2.14425	3.30156e-05	VASP, ITGB1, MYO1B, ACTC1, MYO6, FSCN1, ITGA6, LCP1, IQGAP2, EZR, MYO1G	512	81	20472	5.42998	0.0198413	0.000385393	0.000310473
GOTERM_CC_DIRECT	GO:0005902~microvillus	11	2.14425	1.3049e-05	MYO1D, ATP6V1A, AOC3, CLIC4, MYO1B, MYO6, FSCN1, ATP6V1B2, IQGAP2, EZR, MYO1G	512	73	20472	6.02504	0.00788948	0.000176016	0.000141799
GOTERM_CC_DIRECT	GO:0030667~secretory granule membrane	10	1.94932	0.000958803	RAB10, RAB31, PTPRC, CD93, FABP5, COPB1, HLA-B, PECAM1, RHOG, IQGAP2	512	101	20472	3.95885	0.441373	0.00676736	0.0054518
GOTERM_CC_DIRECT	GO:0030141~secretory granule	10	1.94932	0.000830291	ATP6V1A, COL1A1, GARS1, CTSG, CYBA, CFP, MPO, ELANE, HSPD1, LTF	512	99	20472	4.03883	0.396009	0.00607213	0.00489172
GOTERM_CC_DIRECT	GO:0005604~basement membrane	10	1.94932	0.0005692	ACAN, VTN, COL2A1, SPARC, COL5A1, SERPINF1, TNC, VWA1, TGFBI, HSPG2	512	94	20472	4.25366	0.292207	0.00448707	0.00361479
GOTERM_CC_DIRECT	GO:0035579~specific granule membrane	10	1.94932	0.000447911	ITGAM, RAP2B, CD93, ITGB2, CYBB, ADAM10, ITGAV, CD59, CYBA, CKAP4	512	91	20472	4.39389	0.238102	0.00373788	0.00301124
GOTERM_CC_DIRECT	GO:0045335~phagocytic vesicle	10	1.94932	5.25314e-05	RAB32, GSN, RAB31, ANXA11, ITGAV, FLNB, CORO1A, ELANE, RAB8B, ACTG1	512	69	20472	5.79484	0.0313843	0.000579755	0.000467052
GOTERM_CC_DIRECT	GO:0005791~rough endoplasmic reticulum	10	1.94932	2.19449e-05	SEC61A1, APP, PKM, CANX, CYBB, PLOD3, SYNE3, CKAP4, HSPD1, RPS23	512	62	20472	6.44909	0.0132324	0.000266411	0.000214621
GOTERM_CC_DIRECT	GO:0072686~mitotic spindle	9	1.75439	0.0244076	EML4, TUBB8, TUBB2B, EPB41, TUBB, TPR, HNRNPU, MAP4, TUBB4B	512	140	20472	2.57042	1	0.105074	0.0846476
GOTERM_CC_DIRECT	GO:0030018~Z disc	9	1.75439	0.0193423	CSRP1, SLC2A1, HSPB1, CTNNB1, SLC4A1, FLNB, PDLIM5, ANK1, MYH7	512	134	20472	2.68552	0.999993	0.0850781	0.068539
GOTERM_CC_DIRECT	GO:0055037~recycling endosome	9	1.75439	0.0185776	ITGB1, RAB10, EEA1, APP, TF, TUBA1A, TFRC, STX7, LTF	512	133	20472	2.70571	0.999989	0.0823108	0.0663097
GOTERM_CC_DIRECT	GO:0030176~integral component of endoplasmic reticulum membrane	9	1.75439	0.0157342	SEC61A1, RTN1, STIM1, ARL6IP1, HSPA5, ATP13A1, RRBP1, RTN4, LNPK	512	129	20472	2.78961	0.999934	0.0730193	0.0588244
GOTERM_CC_DIRECT	GO:0055038~recycling endosome membrane	9	1.75439	0.0040313	RAB10, EHD1, RAP2B, TFRC, HLA-B, PACSIN2, HLA-A, NDRG1, RAB8B	512	102	20472	3.52803	0.913874	0.0235288	0.0189549
GOTERM_CC_DIRECT	GO:0032587~ruffle membrane	9	1.75439	0.00335683	ITGB1, EEF1A1, ARF4, ITGB3, MYO6, PACSIN2, ITGAV, LCP1, EZR	512	99	20472	3.63494	0.870104	0.0201742	0.0162524
GOTERM_CC_DIRECT	GO:0071013~catalytic step 2 spliceosome	9	1.75439	0.00171773	SYNCRIP, SF3B2, HNRNPA3, HNRNPH1, MAGOH, HNRNPA2B1, HNRNPU, HNRNPR, HNRNPA1	512	89	20472	4.04336	0.647802	0.0115852	0.00933302
GOTERM_CC_DIRECT	GO:0005793~endoplasmic reticulum-Golgi intermediate compartment	9	1.75439	0.000856448	TMED9, HSPA5, COPB1, SERPINH1, COPG1, P4HB, PDIA6, UGGT1, TMED4	512	80	20472	4.49824	0.405531	0.00618886	0.00498575
GOTERM_CC_DIRECT	GO:0070821~tertiary granule membrane	9	1.75439	0.000462221	ITGAM, RAP2B, CD93, COPB1, ITGB2, CYBB, ADAM10, CD59, CYBA	512	73	20472	4.92958	0.244695	0.00379147	0.00305441
GOTERM_CC_DIRECT	GO:0035577~azurophil granule membrane	9	1.75439	9.13377e-05	BST2, CD63, NCSTN, LAMP1, LAMP2, PSAP, CPNE3, ARL8A, CKAP4	512	58	20472	6.20447	0.0539355	0.000894226	0.00072039
GOTERM_CC_DIRECT	GO:0012507~ER to Golgi transport vesicle membrane	9	1.75439	7.07058e-05	SEC23A, SEC13, USO1, HLA-B, HLA-DRA, CD59, HLA-A, SEC31A, HLA-DPA1	512	56	20472	6.42606	0.0420119	0.000715307	0.000576252
GOTERM_CC_DIRECT	GO:0022627~cytosolic small ribosomal subunit	9	1.75439	1.61591e-05	RPS15, RPS26, RPS4X, RACK1, RPSA, RPS3A, RPS2, RPS11, RPS23	512	46	20472	7.82303	0.00976072	0.000200175	0.000161261
GOTERM_CC_DIRECT	GO:0032588~trans-Golgi network membrane	8	1.55945	0.0139978	APP, MYO1B, RAB31, M6PR, BPNT2, HLA-DRA, CLTA, HLA-DPA1	512	102	20472	3.13603	0.999808	0.0663802	0.053476
GOTERM_CC_DIRECT	GO:0005758~mitochondrial intermembrane space	8	1.55945	0.00729102	FKBP10, TIMM9, COX17, CAT, CAPN2, ALPL, NDUFS1, PARK7	512	90	20472	3.55417	0.988226	0.0362758	0.0292238
GOTERM_CC_DIRECT	GO:0044297~cell body	8	1.55945	0.00607542	CCT3, ACTC1, TUBB, DPYSL3, PARK7, CCT8, EZR, RPL28	512	87	20472	3.67672	0.975252	0.0317912	0.0256111
GOTERM_CC_DIRECT	GO:0030669~clathrin-coated endocytic vesicle membrane	8	1.55945	0.00178784	TGOLN2, TF, TFRC, M6PR, CD9, HLA-DRA, APOE, HLA-DPA1	512	70	20472	4.56964	0.662501	0.0119255	0.00960721
GOTERM_CC_DIRECT	GO:0000502~proteasome complex	8	1.55945	0.000520477	PSMA5, PSMA6, USP14, PSMD7, PSMA2, PSMB1, HSPB1, RAD23B	512	57	20472	5.61184	0.270949	0.00415696	0.00334886
GOTERM_CC_DIRECT	GO:0016459~myosin complex	8	1.55945	0.000200754	MYO1D, MYL6, MYO1B, ACAA2, MYO6, MYH9, MYH7, MYO1G	512	49	20472	6.52806	0.114737	0.00184169	0.00148367
GOTERM_CC_DIRECT	GO:0042788~polysomal ribosome	8	1.55945	1.40924e-05	RPS26, RPL30, RPL32, RPL31, RPL24, RPL38, RPL8, RPS23	512	33	20472	9.69318	0.00851768	0.000182002	0.000146621
GOTERM_CC_DIRECT	GO:0005811~lipid particle	7	1.36452	0.0443107	BCAP31, EHD1, SYNGR2, PLIN3, HSD17B11, GAPDH, CKAP4	512	103	20472	2.71738	1	0.176951	0.142552
GOTERM_CC_DIRECT	GO:0045171~intercellular bridge	7	1.36452	0.0276535	TUBB8, GSTM3, TUBB2B, EPB41, SEPTIN2, TUBB, TUBB4B	512	92	20472	3.04229	1	0.116567	0.0939068
GOTERM_CC_DIRECT	GO:0045177~apical part of cell	7	1.36452	0.0132812	APP, CLIC4, ENPEP, MYO1B, MYO6, CTNNB1, EZR	512	78	20472	3.58834	0.999701	0.0634778	0.0511378
GOTERM_CC_DIRECT	GO:0030139~endocytic vesicle	7	1.36452	0.00647973	EHD1, TF, STX7, MYO6, DYSF, FLOT2, APOA1	512	67	20472	4.17747	0.980668	0.0327766	0.0264049
GOTERM_CC_DIRECT	GO:0035580~specific granule lumen	7	1.36452	0.00442887	CNN2, LYZ, CFP, ILF2, CAMP, ELANE, LTF	512	62	20472	4.51436	0.93241	0.0248919	0.0200529
GOTERM_CC_DIRECT	GO:0005903~brush border	7	1.36452	0.00442887	MYO1D, ENPEP, MYL6, MYO1B, MYH9, FLNB, EZR	512	62	20472	4.51436	0.93241	0.0248919	0.0200529
GOTERM_CC_DIRECT	GO:0005782~peroxisomal matrix	7	1.36452	0.00199574	SCP2, ACOX1, IDH1, AGPS, CAT, HSD17B4, HSPD1	512	53	20472	5.28096	0.702584	0.0128874	0.0103821
GOTERM_CC_DIRECT	GO:0044853~plasma membrane raft	7	1.36452	0.000174315	MYO1D, ITGAM, STIM1, ITGB2, PRTN3, EZR, ADD2	512	34	20472	8.23208	0.100412	0.00162784	0.00131139
GOTERM_CC_DIRECT	GO:0002102~podosome	7	1.36452	8.37507e-05	GSN, CTTN, WDR1, SH3PXD2B, FSCN1, LCP1, FERMT3	512	30	20472	9.32969	0.0495681	0.000833388	0.000671379
GOTERM_CC_DIRECT	GO:0015935~small ribosomal subunit	7	1.36452	6.84337e-05	RPS15, RPS26, RPS4X, RACK1, RPSA, RPS2, RPS23	512	29	20472	9.6514	0.0406897	0.000704055	0.000567188
GOTERM_CC_DIRECT	GO:0071556~integral component of lumenal side of endoplasmic reticulum membrane	7	1.36452	6.84337e-05	BCAP31, CANX, HLA-B, HLA-DRA, HLA-A, CALR, HLA-DPA1	512	29	20472	9.6514	0.0406897	0.000704055	0.000567188
GOTERM_CC_DIRECT	GO:0008305~integrin complex	7	1.36452	5.54364e-05	ITGB1, ITGAM, ITGB3, ITGB2, ITGA2B, ITGAV, ITGA6	512	28	20472	9.99609	0.033091	0.000600891	0.000484079
GOTERM_CC_DIRECT	GO:0030863~cortical cytoskeleton	7	1.36452	1.24689e-05	MPP1, CTTN, EPB42, EPB41, MYH9, SLC4A1, EZR	512	22	20472	12.7223	0.00754011	0.000172014	0.000138575
GOTERM_CC_DIRECT	GO:0031092~platelet alpha granule membrane	7	1.36452	2.30016e-06	SPARC, TMX3, ITGB3, CD109, ITGA2B, PECAM1, CD9	512	17	20472	16.4642	0.00139523	3.58e-05	2.88405e-05
GOTERM_CC_DIRECT	GO:0097038~perinuclear endoplasmic reticulum	7	1.36452	2.30016e-06	BCAP31, CAPN2, CYBB, ADAM10, CISD2, DBI, CYBA	512	17	20472	16.4642	0.00139523	3.58e-05	2.88405e-05
GOTERM_CC_DIRECT	GO:0005901~caveola	6	1.16959	0.043388	PTGIS, SLC2A1, FLOT1, PACSIN2, HMOX1, FLOT2	512	77	20472	3.11567	1	0.174414	0.140508
GOTERM_CC_DIRECT	GO:0005778~peroxisomal membrane	6	1.16959	0.0273805	ACOX1, IMPDH2, AGPS, CAT, HSD17B4, RAB8B	512	68	20472	3.52803	1	0.116223	0.0936297
GOTERM_CC_DIRECT	GO:0005905~clathrin-coated pit	6	1.16959	0.0179773	APP, TF, CTTN, TFRC, MYO6, HSPD1	512	61	20472	3.93289	0.999983	0.0802368	0.0646388
GOTERM_CC_DIRECT	GO:0101003~ficolin-1-rich granule membrane	6	1.16959	0.0179773	CD93, LAMP1, COPB1, LAMP2, ITGB2, ARL8A	512	61	20472	3.93289	0.999983	0.0802368	0.0646388
GOTERM_CC_DIRECT	GO:0009898~cytoplasmic side of plasma membrane	6	1.16959	0.0179773	G6PD, PTPRC, EPB41, MYH9, SLC4A1, ANK1	512	61	20472	3.93289	0.999983	0.0802368	0.0646388
GOTERM_CC_DIRECT	GO:0042645~mitochondrial nucleoid	6	1.16959	0.00560698	LRRC59, LONP1, VDAC1, SOD2, HSD17B10, ATAD3A	512	46	20472	5.21535	0.967058	0.0298547	0.024051
GOTERM_CC_DIRECT	GO:0001772~immunological synapse	6	1.16959	0.00510002	STX7, HLA-DRA, MYH9, EZR, CORO1A, ICAM1	512	45	20472	5.33125	0.955114	0.0273957	0.02207
GOTERM_CC_DIRECT	GO:0034364~high-density lipoprotein particle	6	1.16959	0.000486793	APP, APOA2, HDLBP, APOF, APOA1, APOE	512	27	20472	8.88542	0.255882	0.00393978	0.00317389
GOTERM_CC_DIRECT	GO:0034663~endoplasmic reticulum chaperone complex	6	1.16959	3.87672e-06	HSPA5, DNAJB11, MZB1, P4HB, PDIA6, HSP90B1	512	11	20472	21.8097	0.00235041	5.88293e-05	4.7393e-05
GOTERM_CC_DIRECT	GO:0005844~polysome	5	0.974659	0.0120146	RPS4X, PSMA6, FUS, HDLBP, CALR	512	36	20472	5.55339	0.999349	0.0578872	0.046634
GOTERM_CC_DIRECT	GO:0001891~phagocytic cup	5	0.974659	0.00488285	RAB31, RACK1, LCP1, CORO1A, MYO1G	512	28	20472	7.14007	0.948756	0.0264633	0.0213189
GOTERM_CC_DIRECT	GO:0005790~smooth endoplasmic reticulum	5	0.974659	0.00426824	MYO1D, APP, HSPA5, CANX, CALR	512	27	20472	7.40451	0.925456	0.0244956	0.0197337
GOTERM_CC_DIRECT	GO:0031258~lamellipodium membrane	5	0.974659	0.00196296	VASP, ITGB3, ITGAV, CSPG4, FERMT2	512	22	20472	9.08736	0.696596	0.012812	0.0103214
GOTERM_CC_DIRECT	GO:0071682~endocytic vesicle lumen	5	0.974659	0.000888664	SPARC, APOA1, CALR, APOE, HSP90B1	512	18	20472	11.1068	0.417053	0.00634611	0.00511243
GOTERM_CC_DIRECT	GO:0031091~platelet alpha granule	5	0.974659	0.000705004	FGB, FGA, SPARC, MMRN1, FGG	512	17	20472	11.7601	0.348246	0.00534922	0.00430934
GOTERM_CC_DIRECT	GO:0030126~COPI vesicle coat	5	0.974659	0.000229292	COPB2, COPA, COPB1, COPG1, ARCN1	512	13	20472	15.3786	0.129943	0.00198829	0.00160177
GOTERM_CC_DIRECT	GO:0031941~filamentous actin	4	0.779727	0.038122	DPYSL3, MYO6, PDLIM5, ACTG1	512	30	20472	5.33125	1	0.154267	0.124278
GOTERM_CC_DIRECT	GO:0031528~microvillus membrane	4	0.779727	0.0349382	ITGB3, CTNNB1, ITGAV, EZR	512	29	20472	5.51509	1	0.143294	0.115438
GOTERM_CC_DIRECT	GO:0042613~MHC class II protein complex	4	0.779727	0.0262555	HLA-B, HLA-DRA, HLA-A, HLA-DPA1	512	26	20472	6.15144	1	0.112233	0.0904152
GOTERM_CC_DIRECT	GO:0044291~cell-cell contact zone	4	0.779727	0.0211994	RAP2B, AHNAK, FLOT1, FLOT2	512	24	20472	6.66406	0.999998	0.0919146	0.0740465
GOTERM_CC_DIRECT	GO:0005839~proteasome core complex	4	0.779727	0.0147179	PSMA5, PSMA6, PSMA2, PSMB1	512	21	20472	7.61607	0.999877	0.069254	0.0557911
GOTERM_CC_DIRECT	GO:0031105~septin complex	4	0.779727	0.00458349	SEPTIN2, SEPTIN9, SEPTIN11, SEPTIN7	512	14	20472	11.4241	0.938491	0.0250647	0.0201921
GOTERM_CC_DIRECT	GO:0032153~cell division site	4	0.779727	0.00458349	SEPTIN2, SEPTIN9, SEPTIN11, SEPTIN7	512	14	20472	11.4241	0.938491	0.0250647	0.0201921
GOTERM_CC_DIRECT	GO:0005940~septin ring	4	0.779727	0.00458349	SEPTIN2, SEPTIN9, SEPTIN11, SEPTIN7	512	14	20472	11.4241	0.938491	0.0250647	0.0201921
GOTERM_CC_DIRECT	GO:0042581~specific granule	4	0.779727	0.00366875	ANXA3, ANXA11, CAMP, LTF	512	13	20472	12.3029	0.892582	0.0216207	0.0174177
GOTERM_CC_DIRECT	GO:0005614~interstitial matrix	4	0.779727	0.00287503	COL14A1, ABI3BP, TNC, VWA1	512	12	20472	13.3281	0.825818	0.0174514	0.0140589
GOTERM_CC_DIRECT	GO:0001931~uropod	4	0.779727	0.00287503	FLOT1, MYH9, FLOT2, EZR	512	12	20472	13.3281	0.825818	0.0174514	0.0140589
GOTERM_CC_DIRECT	GO:0044754~autolysosome	4	0.779727	0.00219675	LAMP1, FTH1, LAMP2, FTL	512	11	20472	14.5398	0.736815	0.0138899	0.0111897
GOTERM_CC_DIRECT	GO:0042582~azurophil granule	4	0.779727	0.00162767	HEXA, STX7, ANXA11, MPO	512	10	20472	15.9938	0.627978	0.0111011	0.00894305
GOTERM_CC_DIRECT	GO:0008091~spectrin	4	0.779727	0.00116082	SPTA1, PRKCB, EPB41L2, SPTB	512	9	20472	17.7708	0.505904	0.008007	0.00645045
GOTERM_CC_DIRECT	GO:0016600~flotillin complex	4	0.779727	0.00116082	FLOT1, CTNNA1, CTNNB1, FLOT2	512	9	20472	17.7708	0.505904	0.008007	0.00645045
GOTERM_CC_DIRECT	GO:0014731~spectrin-associated cytoskeleton	4	0.779727	0.000788463	SPTA1, EPB41, SPTB, ANK1	512	8	20472	19.9922	0.380465	0.00583655	0.00470193
GOTERM_CC_DIRECT	GO:0042627~chylomicron	3	0.584795	0.0464119	APOA2, APOA1, APOE	512	14	20472	8.56808	1	0.182935	0.147373
GOTERM_CC_DIRECT	GO:0034362~low-density lipoprotein particle	3	0.584795	0.0464119	APOF, APOA1, APOE	512	14	20472	8.56808	1	0.182935	0.147373
GOTERM_CC_DIRECT	GO:0017101~aminoacyl-tRNA synthetase multienzyme complex	3	0.584795	0.0347798	QARS1, EPRS1, IARS1	512	12	20472	9.99609	1	0.143294	0.115438
GOTERM_CC_DIRECT	GO:0019773~proteasome core complex, alpha-subunit complex	3	0.584795	0.0294624	PSMA5, PSMA6, PSMA2	512	11	20472	10.9048	1	0.122491	0.0986787
GOTERM_CC_DIRECT	GO:0099738~cell cortex region	3	0.584795	0.0294624	EPB41, EPB41L2, ENO1	512	11	20472	10.9048	1	0.122491	0.0986787
GOTERM_CC_DIRECT	GO:0031095~platelet dense tubular network membrane	3	0.584795	0.0199295	EHD1, ATP2A3, ATP2A2	512	9	20472	13.3281	0.999995	0.0870303	0.0701117
GOTERM_CC_DIRECT	GO:0005577~fibrinogen complex	3	0.584795	0.0157587	FGB, FGA, FGG	512	8	20472	14.9941	0.999935	0.0730193	0.0588244
GOTERM_CC_DIRECT	GO:0097433~dense body	3	0.584795	0.0120161	TF, SND1, ACTG1	512	7	20472	17.1362	0.99935	0.0578872	0.046634
GOTERM_CC_DIRECT	GO:0034363~intermediate-density lipoprotein particle	3	0.584795	0.00872641	APP, APOA1, APOE	512	6	20472	19.9922	0.995108	0.0427172	0.034413
GOTERM_CC_DIRECT	GO:0005592~collagen type XI trimer	3	0.584795	0.00591505	COL2A1, COL5A1, COL5A2	512	5	20472	23.9906	0.972706	0.0312212	0.0251518
GOTERM_CC_DIRECT	GO:0097452~GAIT complex	3	0.584795	0.0036086	SYNCRIP, EPRS1, GAPDH	512	4	20472	29.9883	0.888573	0.0214747	0.0173001
GOTERM_CC_DIRECT	GO:0005589~collagen type VI trimer	3	0.584795	0.00183465	COL6A1, COL6A3, DCN	512	3	20472	39.9844	0.671972	0.0121047	0.00975157
GOTERM_CC_DIRECT	GO:0008043~intracellular ferritin complex	2	0.389864	0.0493	FTH1, FTL	512	2	20472	39.9844	1	0.18587	0.149737
GOTERM_CC_DIRECT	GO:1990777~lipoprotein particle	2	0.389864	0.0493	APP, APOE	512	2	20472	39.9844	1	0.18587	0.149737
GOTERM_CC_DIRECT	GO:0098966~perisynaptic extracellular matrix	2	0.389864	0.0493	ACAN, TNC	512	2	20472	39.9844	1	0.18587	0.149737
GOTERM_CC_DIRECT	GO:0016222~procollagen-proline 4-dioxygenase complex	2	0.389864	0.0493	P4HA1, P4HB	512	2	20472	39.9844	1	0.18587	0.149737
GOTERM_CC_DIRECT	GO:0034688~integrin alphaM-beta2 complex	2	0.389864	0.0493	ITGAM, ITGB2	512	2	20472	39.9844	1	0.18587	0.149737
GOTERM_CC_DIRECT	GO:0098857~membrane microdomain	2	0.389864	0.0493	PTPRC, LAMP2	512	2	20472	39.9844	1	0.18587	0.149737

## Sheet: C-A(MF)
Category	Term	Count	%	PValue	Genes	List Total	Pop Hits	Pop Total	Fold Enrichment	Bonferroni	Benjamini	FDR
GOTERM_MF_DIRECT	GO:0005515~protein binding	418	81.4815	3.35179e-16	RPL30, RPL3, TFRC, RPL31, HNRNPU, SLC4A1, C4BPA, HNRNPR, C4BPB, ENO1, SMC3, RPL8, RPL9, PSMD7, TFG, SCP2, DPYSL2, DPYSL3, NAMPT, CYP1B1, RPL38, CDK5RAP3, PRKCB, SERPINF1, RPL23, CLEC11A, HSPG2, SND1, EML4, MYL6, RBP4, RPL24, UQCRC2, RPL28, ENDOD1, THY1, CFP, LDHB, NCSTN, LDHA, C9, PRDX1, EPB41L2, MYO6, S100A13, SERPINH1, HMOX1, ELANE, GSTM3, H1-0, HNRNPL, COL1A1, EHD1, H2AC21, HNRNPD, FERMT2, ARF…	506	12539	18811	1.2393	2.72116e-13	6.84602e-14	6.38515e-14
GOTERM_MF_DIRECT	GO:0003723~RNA binding	115	22.4172	6.64579e-26	RPL30, ACAA2, RPL3, RPL32, TFRC, RPL31, RTCB, HDLBP, CISD2, HNRNPU, PEBP1, C4BPA, HNRNPR, ENO1, RPL8, RPL9, UBE2L3, RPS15, LGALS1, MAGOH, RPL38, CPNE3, RPS11, SLC16A3, SEC63, RPL23, ANXA11, RPSA, HLA-A, ILF2, SND1, EEF1A1, ILF3, FSCN1, RPL24, KCTD12, EZR, RPL29, RPL28, PPIA, FKBP3, LRRC59, DDX1, TXN, CORO1A, RTN4, HSP90B1, HNRNPDL, PRDX1, TPR, SERPINH1, MAP4, FUS, H1-0, RPS26, HNRNPL, BST2, ALDH6…	506	1470	18811	2.90832	5.42961e-23	5.42961e-23	5.06409e-23
GOTERM_MF_DIRECT	GO:0042802~identical protein binding	99	19.2982	3.37555e-13	APP, TFRC, ARL6IP1, ITGA2B, HNRNPU, PARK7, ACTG1, LGALS1, TFG, DPYSL2, FTH1, DPYSL3, NAMPT, LONP1, BANF1, TGM2, CPT1A, G6PD, ATAD3A, STIM1, VDAC1, KCTD12, EZR, ALDH7A1, FTL, CORO1A, ADH5, ACAT1, VTN, LDHB, LDHA, PRDX1, PSAP, MYO6, PACSIN2, HMOX1, APOE, A2M, GSTM3, CBX3, FUS, IDH1, LYZ, BST2, EHD1, COL1A1, EPRS1, P4HA1, TGFBI, YWHAE, ITGB3, SLC2A1, HSPB1, DBI, TUBA1A, YWHAQ, DDI2, GFUS, SUN2, SEC1…	506	1712	18811	2.14977	2.75744e-10	3.93975e-11	3.67453e-11
GOTERM_MF_DIRECT	GO:0005509~calcium ion binding	49	9.55166	2.63732e-08	FKBP10, SPARC, PROS1, DYSF, ATP2A2, COMP, STAB1, CAPN2, ENPP1, ANXA7, PLS3, ME2, HABP2, TGM2, CD93, ANXA3, ANXA11, HSPG2, ASPN, RCN3, MYL6, VCAN, F9, STIM1, MMRN1, GPD2, CANX, FKBP7, FKBP9, LCP1, S100A9, MATN2, SLC25A13, APCS, ITIH1, FBLN2, LTBP1, HSP90B1, SPTA1, ACAN, S100A13, AOC3, GSN, GCA, HSPA5, EHD1, ALPL, CALR, PLCD1	506	752	18811	2.42237	2.15467e-05	1.95881e-06	1.82695e-06
GOTERM_MF_DIRECT	GO:0045296~cadherin binding	49	9.55166	9.46559e-23	ITGB1, YWHAE, CTNND1, HDLBP, PARK7, ENO1, H1-10, LASP1, BSG, RACK1, SND1, EEF1G, PKM, CTTN, EEF1D, FSCN1, RPL24, MYH9, PLIN3, ITGA6, TAGLN2, EZR, RPL29, LRRC59, AHNAK, USO1, SLC3A2, NDRG1, RTN4, ADD1, CNN2, LDHA, PRDX1, CTNNA1, PACSIN2, FLNB, RPS2, CCT8, VASP, HSPA5, SEPTIN2, IDH1, SEPTIN9, SEPTIN7, EHD1, RPS26, MYO1B, SERBP1, CTNNB1	506	316	18811	5.76462	7.73339e-20	3.86669e-20	3.60639e-20
GOTERM_MF_DIRECT	GO:0042803~protein homodimerization activity	44	8.577	6.7701e-07	APP, TFRC, TIMM9, HSD17B4, CISD2, HSPB1, SLC4A1, ENO1, PARK7, TXN, ELAVL1, CORO1A, ADD1, RTN4, ADD2, EEA1, PSMD7, TPR, PSAP, S100A13, RACK1, HMOX1, ENPP1, BANF1, APOE, GSTM3, G6PD, TPI1, GCA, IDH1, APOA2, DEFA3, APOA1, ADAM10, PML, BST2, NUDT21, SARS1, EPRS1, ACOX1, GPD1, CAT, PECAM1, MYH9	506	713	18811	2.29416	0.000552965	3.68745e-05	3.43921e-05
GOTERM_MF_DIRECT	GO:0019899~enzyme binding	33	6.43275	2.31617e-08	YWHAE, APP, ITGB3, ATP2A2, PEBP1, PLG, PARK7, HSPD1, UBE2L3, ACAT1, LAMP1, LAMP2, RACK1, CAPN2, HMOX1, BANF1, APOE, RPS2, A2M, GSTM3, HSPA5, CBX3, APOA2, NME2, APOA1, SOD2, ANK1, SARS1, CAT, ALOX5AP, CTNNB1, PRTN3, P4HB	506	390	18811	3.14565	1.8923e-05	1.89231e-06	1.76492e-06
GOTERM_MF_DIRECT	GO:0005201~extracellular matrix structural constituent	33	6.43275	3.03866e-21	COL15A1, TINAGL1, SPARC, TNXB, COL14A1, TNC, DPT, PRELP, AEBP1, LTBP1, FBLN2, COMP, VTN, ACAN, ABI3BP, CTHRC1, FGB, FGA, LUM, FGG, BGN, PCOLCE, MFAP5, COL1A1, COL2A1, MMRN1, COL5A1, OPTC, COL5A2, VWA1, TGFBI, MFGE8, MATN2	506	138	18811	8.88989	2.48259e-18	8.27529e-19	7.71821e-19
GOTERM_MF_DIRECT	GO:0003779~actin binding	30	5.84795	4.32947e-08	ITGB1, ACAA2, EPB41, HNRNPU, IQGAP2, CORO1A, ADD1, CNN3, ADD2, CNN2, LASP1, EPB41L2, MYO6, FLNB, PDLIM5, VASP, CAP1, GSN, DSTN, SPTB, MYO1D, MYO1B, FSCN1, MYH9, LCP1, P4HB, EZR, FERMT2, MYO1G, MYH7	506	339	18811	3.2899	3.53711e-05	2.94764e-06	2.74921e-06
GOTERM_MF_DIRECT	GO:0005178~integrin binding	29	5.65302	2.95633e-15	ITGB1, APP, ITGAM, TNXB, ITGB3, ITGA2B, ITGB2, THY1, ICAM1, COMP, VTN, SPP1, ANXA7, ITGAV, ADAM10, HSPG2, CXCL12, COL5A1, MYH9, CD9, ITGA6, TGFBI, LCP1, P4HB, CALR, MFGE8, PPIA, FERMT2, FERMT3	506	161	18811	6.69628	2.44904e-12	4.02554e-13	3.75454e-13
GOTERM_MF_DIRECT	GO:0005102~receptor binding	27	5.26316	2.76642e-05	APP, CTNND1, PLG, PARK7, GLG1, KNG1, SCP2, RACK1, APOF, LBP, APOE, A2M, RAB8B, MPP1, FGB, FGA, FGG, APOA2, HLA-B, APOA1, ADAM10, CNPY3, HLA-A, PTPRC, CXCL12, DNAJB11, PRTN3	506	396	18811	2.53472	0.0223484	0.00107627	0.00100381
GOTERM_MF_DIRECT	GO:0019901~protein kinase binding	26	5.06823	0.00299025	DCTN2, TFRC, GSTP1, CTNND1, ITGB2, PEBP1, HSPB1, THY1, ELAVL1, ADD2, RPS6KA3, QARS1, DPYSL2, RAC2, CDK5RAP3, HNRNPA0, PGAM1, RHOG, ADAM10, OXSR1, EEF1A1, PTPRC, CTNNB1, VDAC1, CSPG4, FERMT2	506	510	18811	1.89524	0.91342	0.0538049	0.0501828
GOTERM_MF_DIRECT	GO:0005525~GTP binding	25	4.87329	0.000214369	ARF4, RALB, RTCB, SEPTIN11, TUBB8, TUBA1B, TUBA1A, RAC2, TGM2, RAB8B, PCK2, SEPTIN2, TUBB, RHOG, TUBB4B, SEPTIN9, SEPTIN7, RAB10, RAB32, EHD1, EEF1A1, TUBB2B, RAB31, RAP2B, ARL8A	506	399	18811	2.32932	0.160676	0.00583798	0.00544497
GOTERM_MF_DIRECT	GO:0051015~actin filament binding	25	4.87329	9.82375e-09	WDR1, IQGAP2, CORO1A, SYNE3, ADD1, ADD2, SPTA1, LASP1, MYO6, CTNNA1, PLS3, FLNB, GSN, DSTN, SPTB, MYO1D, MYO1B, CTTN, FSCN1, MYH9, LCP1, EZR, FERMT2, MYO1G, MYH7	506	225	18811	4.13065	8.02598e-06	8.91779e-07	8.31745e-07
GOTERM_MF_DIRECT	GO:0003924~GTPase activity	21	4.09357	0.00137332	ARF4, RALB, SEPTIN2, TUBB, RHOG, SEPTIN9, SEPTIN11, SEPTIN7, RAB32, RAB10, TUBB8, EEF1A1, TUBB2B, TUBA1A, RAB31, RAP2B, ARHGDIB, RAC2, ARL8A, TGM2, RAB8B	506	351	18811	2.2242	0.674624	0.0287693	0.0268326
GOTERM_MF_DIRECT	GO:0005198~structural molecule activity	21	4.09357	1.61009e-07	FGB, FGA, COPB2, COPA, SEC13, EPB41, COPB1, TUBB, FGG, CLTA, ANK1, SEPTIN7, TUBA1B, TUBA1A, EPB41L2, CTNNA1, HMOX1, COPG1, MAP4, APOE, SEC31A	506	187	18811	4.17483	0.000131536	9.39603e-06	8.7635e-06
GOTERM_MF_DIRECT	GO:0005518~collagen binding	21	4.09357	6.0962e-16	LRRC15, TNXB, SPARC, COL14A1, LUM, P3H1, PCOLCE, AEBP1, MMP9, DCN, ASPN, COCH, MRC2, COMP, VTN, ABI3BP, COL6A2, COL6A1, SERPINH1, TGFBI, CTSB	506	68	18811	11.4808	4.53526e-13	9.96119e-14	9.29061e-14
GOTERM_MF_DIRECT	GO:0003735~structural constituent of ribosome	20	3.89864	8.54942e-07	RPL30, RPL3, RPL32, RPL31, RPL23, RPS3A, RPSA, RPL8, RPL9, RPS15, RPS4X, RPS26, RPL27A, RPL24, RPL38, RPS2, RPL29, RPS11, RPL28, RPS23	506	189	18811	3.93396	0.000698244	4.36555e-05	4.07166e-05
GOTERM_MF_DIRECT	GO:0008201~heparin binding	19	3.7037	1.29073e-06	APP, TNXB, SERPINC1, SERPINA10, PRELP, PCOLCE, MPO, KNG1, COMP, VTN, PTPRC, COL5A1, ABI3BP, CTSG, APOE, RPL29, ELANE, PF4, LTF	506	176	18811	4.01331	0.00105397	5.85847e-05	5.46408e-05
GOTERM_MF_DIRECT	GO:0019904~protein domain specific binding	18	3.50877	0.000790181	YWHAE, HSPA5, CBX3, TUBB, M6PR, HMGB2, PLG, MYO1D, TUBA1A, RAP2B, LAMP1, YWHAQ, LAMP2, MYH9, EZR, HNRNPA1, SKP1, TGM2	506	263	18811	2.54436	0.475774	0.0174481	0.0162735
GOTERM_MF_DIRECT	GO:0046982~protein heterodimerization activity	17	3.31384	0.0432792	ITGB1, YWHAE, AOC3, APP, GCA, HEXA, APOA2, CYBB, CYBA, SMC3, ADD1, PML, ADD2, H3C15, TUBB2B, H2AC21, P4HB	506	371	18811	1.70348	1	0.368324	0.343528
GOTERM_MF_DIRECT	GO:0003729~mRNA binding	16	3.11891	0.00255954	HNRNPA3, HDLBP, HNRNPR, PARK7, ELAVL1, RPS26, HNRNPL, NUDT21, SYNCRIP, PTBP1, PKM, TPR, RPL24, RPS2, CALR, HNRNPA0	506	244	18811	2.43776	0.876785	0.0501709	0.0467935
GOTERM_MF_DIRECT	GO:0031625~ubiquitin protein ligase binding	15	2.92398	0.0366646	YWHAE, GPI, RALB, TPI1, HSPA5, RPL23, TUBB, RTN4, PML, HSPD1, UBE2L3, ACTG1, TUBA1B, UBE2N, CALR	506	305	18811	1.82832	1	0.329176	0.307016
GOTERM_MF_DIRECT	GO:0005516~calmodulin binding	15	2.92398	0.00133033	EPB41, AEBP1, IQGAP2, ADD1, CNN3, ADD2, MYO1D, CNN2, EEA1, EEF1A1, MYO1B, MYO6, MYH9, MYO1G, MYH7	506	205	18811	2.72019	0.662976	0.028602	0.0266766
GOTERM_MF_DIRECT	GO:0051082~unfolded protein binding	14	2.72904	5.23456e-05	CCT3, APCS, HSPA5, HSPB1, TUBB4B, HSPD1, HSP90B1, DNAJB11, CANX, SERPINH1, CCT8, CALR, PPIA, UGGT1	506	131	18811	3.973	0.0418658	0.00171065	0.00159549
GOTERM_MF_DIRECT	GO:0016491~oxidoreductase activity	13	2.53411	0.0300209	ERO1A, CYBB, HSD17B4, HSD17B11, CP, HSD17B10, ADH5, DHRS7, PRDX1, IMPDH2, AGPS, PHGDH, BLVRA	506	241	18811	2.00534	1	0.29245	0.272762
GOTERM_MF_DIRECT	GO:0002020~protease binding	13	2.53411	3.63399e-05	ITGB1, CSTB, SERPINC1, ITGB3, COL1A1, COMP, STIM1, PSAP, FLOT1, FLOT2, ITGAV, A2M, ELANE	506	109	18811	4.43382	0.0292538	0.00129086	0.00120396
GOTERM_MF_DIRECT	GO:0005200~structural constituent of cytoskeleton	13	2.53411	3.01721e-05	EPB42, EPB41, TUBB, TUBB4B, SPTB, ANK1, ACTG1, ADD2, TUBB8, SPTA1, TUBA1B, TUBB2B, TUBA1A	506	107	18811	4.5167	0.0243496	0.00112048	0.00104505
GOTERM_MF_DIRECT	GO:0030246~carbohydrate binding	11	2.14425	0.0428123	MRC2, ACAN, SIGLEC16, APCS, VCAN, GANAB, LGALS1, CD93, CLEC11A, CANX, CALR	506	199	18811	2.05495	1	0.368185	0.343399
GOTERM_MF_DIRECT	GO:0005506~iron ion binding	11	2.14425	0.00503682	PTGIS, P4HA1, P4HA2, FTH1, TBXAS1, CYP1B1, PLOD3, P3H1, CALR, FTL, LTF	506	142	18811	2.87982	0.983844	0.0762052	0.0710751
GOTERM_MF_DIRECT	GO:0051087~chaperone binding	11	2.14425	0.00075779	FGB, APP, GRN, HSPA5, TFRC, TIMM9, HLA-B, PLG, CALR, CP, HSPD1	506	110	18811	3.71759	0.461705	0.0171976	0.0160399
GOTERM_MF_DIRECT	GO:0004867~serine-type endopeptidase inhibitor activity	11	2.14425	0.000450188	APP, SERPINC1, SERPINF1, CD109, SERPINA10, SERPINH1, COL6A3, PEBP1, ITIH1, A2M, SERPINA4	506	103	18811	3.97024	0.307804	0.0111456	0.0103953
GOTERM_MF_DIRECT	GO:0009055~electron carrier activity	11	2.14425	1.66459e-05	P4HA2, AKR1A1, CYBB, AKR1B1, PHGDH, CYBA, NDUFS1, ME2, GFUS, SDHB, ADH5	506	70	18811	5.84193	0.0135077	0.000679984	0.000634208
GOTERM_MF_DIRECT	GO:0030021~extracellular matrix structural constituent conferring compression resistance	11	2.14425	1.23394e-12	ACAN, VCAN, LUM, OGN, BGN, PRG4, PRELP, FMOD, HSPG2, DCN, ASPN	506	16	18811	25.5584	1.0081e-09	1.26017e-10	1.17533e-10
GOTERM_MF_DIRECT	GO:0004175~endopeptidase activity	10	1.94932	0.000540478	PSMA5, PSMA6, F9, PSMA2, ERAP1, PSMB1, ADAM10, PLG, MMP9, ELANE	506	87	18811	4.27309	0.357051	0.0129874	0.0121131
GOTERM_MF_DIRECT	GO:0001618~virus receptor activity	10	1.94932	0.000194658	ITGB1, LAMP1, TFRC, ITGB3, BSG, RPSA, ITGAV, NCAM1, SLC1A5, ICAM1	506	76	18811	4.89156	0.147047	0.00548398	0.0051148
GOTERM_MF_DIRECT	GO:0003725~double-stranded RNA binding	10	1.94932	0.000175714	TUBA1B, ILF3, TFRC, DDX1, HNRNPU, SLC3A2, TUBB4B, ILF2, ELAVL1, HSPD1	506	75	18811	4.95679	0.133741	0.00527263	0.00491768
GOTERM_MF_DIRECT	GO:0030020~extracellular matrix structural constituent conferring tensile strength	10	1.94932	1.09966e-06	COL1A1, COL15A1, COL2A1, COL5A1, COL14A1, COL6A2, COL12A1, COL5A2, COL6A1, COL6A3	506	41	18811	9.06729	0.000898015	5.28481e-05	4.92904e-05
GOTERM_MF_DIRECT	GO:0050840~extracellular matrix binding	10	1.94932	8.03565e-08	VTN, SPARC, ITGB3, ITGA2B, SPP1, BGN, ITGAV, TGFBI, FBLN2, DCN	506	31	18811	11.9922	6.56491e-05	5.0501e-06	4.71013e-06
GOTERM_MF_DIRECT	GO:0020037~heme binding	9	1.75439	0.049595	PTGIS, TBXAS1, CAT, CYBB, CYP1B1, HMOX1, CYBA, EPX, MPO	506	150	18811	2.23055	1	0.393508	0.367017
GOTERM_MF_DIRECT	GO:0048306~calcium-dependent protein binding	9	1.75439	0.00330784	MYO1D, ANXA3, S100A13, ANXA7, ANXA11, CPNE3, A2M, S100A9, SEC31A	506	92	18811	3.63677	0.933262	0.0575	0.0536292
GOTERM_MF_DIRECT	GO:0051287~NAD binding	9	1.75439	9.21286e-06	LDHB, LDHA, AHCY, MDH1, IDH1, GPD1, PHGDH, ME2, GAPDH	506	40	18811	8.36458	0.00749868	0.000396153	0.000369484
GOTERM_MF_DIRECT	GO:0003690~double-stranded DNA binding	8	1.55945	0.0383934	HNRNPDL, HMGB2, HNRNPU, MNDA, BANF1, SMC3, H1-0, H1-10	506	117	18811	2.54194	1	0.34095	0.317998
GOTERM_MF_DIRECT	GO:0003697~single-stranded DNA binding	8	1.55945	0.0354678	IGHM, HNRNPDL, LONP1, HMGB2, HNRNPU, HNRNPA1, RAD23B, HSPD1	506	115	18811	2.58615	1	0.321968	0.300294
GOTERM_MF_DIRECT	GO:0008233~peptidase activity	8	1.55945	0.0300683	APP, CTSG, PARK7, MMP9, HABP2, ELANE, CTSB, TGM2	506	111	18811	2.67934	1	0.29245	0.272762
GOTERM_MF_DIRECT	GO:0019900~kinase binding	8	1.55945	0.020011	EEF1A1, LDHB, LDHA, SLC2A1, CTNNB1, PLG, PARK7, PFKM	506	102	18811	2.91576	1	0.215068	0.200589
GOTERM_MF_DIRECT	GO:0060090~binding, bridging	8	1.55945	0.0083601	CHCHD3, SEPTIN2, SH3PXD2B, RACK1, SEPTIN9, SEPTIN11, SEPTIN7, EIF3B	506	86	18811	3.45822	0.99895	0.108416	0.101117
GOTERM_MF_DIRECT	GO:0050839~cell adhesion molecule binding	8	1.55945	0.00268585	FGB, ITGB1, FGA, ITGB3, ITGB2, FGG, TGFBI, EZR	506	70	18811	4.24867	0.888896	0.0501709	0.0467935
GOTERM_MF_DIRECT	GO:0003774~motor activity	8	1.55945	0.000273552	MYO1D, MYL6, MYO1B, ACAA2, MYO6, MYH9, MYH7, MYO1G	506	48	18811	6.19598	0.200303	0.00720943	0.00672409
GOTERM_MF_DIRECT	GO:0004866~endopeptidase inhibitor activity	8	1.55945	0.000180702	CSTB, USP14, AHSG, PROS1, CD109, SPP2, A2M, KNG1	506	45	18811	6.60905	0.137264	0.00527263	0.00491768
GOTERM_MF_DIRECT	GO:0000146~microfilament motor activity	8	1.55945	4.93426e-05	MYO1D, MYL6, MYO1B, ACTC1, MYO6, MYH9, MYH7, MYO1G	506	37	18811	8.03803	0.0395121	0.0016797	0.00156663
GOTERM_MF_DIRECT	GO:0031072~heat shock protein binding	7	1.36452	0.00976511	ITGAM, HSPA5, EEF1D, TPR, ITGB2, APOA2, APOA1	506	68	18811	3.82693	0.99967	0.124658	0.116266
GOTERM_MF_DIRECT	GO:0008092~cytoskeletal protein binding	7	1.36452	0.0053402	EPB41, EPB41L2, PACSIN2, CAPN2, ALDOC, SYNE3, CORO1A	506	60	18811	4.33719	0.987407	0.0790808	0.0737571
GOTERM_MF_DIRECT	GO:0030507~spectrin binding	7	1.36452	6.65445e-05	PTPRC, DCTN2, EPB41, EPB41L2, ANK1, ADD1, ADD2	506	27	18811	9.63819	0.0529171	0.00209103	0.00195027
GOTERM_MF_DIRECT	GO:0043022~ribosome binding	6	1.16959	0.0419342	SEC61A1, HSPA5, SERBP1, RACK1, RPSA, EIF3C	506	71	18811	3.14162	1	0.36447	0.339934
GOTERM_MF_DIRECT	GO:0005080~protein kinase C binding	6	1.16959	0.0182173	PRKCB, ITGB3, RACK1, HSPB1, ITGAV, PDLIM5	506	57	18811	3.91325	1	0.200697	0.187186
GOTERM_MF_DIRECT	GO:0016616~oxidoreductase activity, acting on the CH-OH group of donors, NAD or NADP as acceptor	6	1.16959	0.00414378	LDHB, DHRS7, LDHA, MDH1, PHGDH, HSD17B11	506	40	18811	5.57638	0.966375	0.0666986	0.0622085
GOTERM_MF_DIRECT	GO:0043236~laminin binding	6	1.16959	0.000563692	ITGB1, LRRC15, TINAGL1, LGALS1, RPSA, ITGA6	506	26	18811	8.57905	0.369137	0.0131582	0.0122724
GOTERM_MF_DIRECT	GO:0015035~protein disulfide oxidoreductase activity	6	1.16959	0.000308147	ERO1A, TMX3, STAB1, P4HB, TXN, PDIA6	506	23	18811	9.69806	0.222596	0.00786738	0.00733775
GOTERM_MF_DIRECT	GO:0046332~SMAD binding	5	0.974659	0.0476502	COL5A2, CTNNB1, IPO7, FERMT2, PML	506	51	18811	3.6447	1	0.385448	0.359499
GOTERM_MF_DIRECT	GO:0005044~scavenger receptor activity	5	0.974659	0.0448258	VTN, CD163, STAB1, ENPP1, PRG4	506	50	18811	3.71759	1	0.376944	0.351568
GOTERM_MF_DIRECT	GO:0003755~peptidyl-prolyl cis-trans isomerase activity	5	0.974659	0.034495	FKBP10, FKBP7, FKBP9, PPIA, FKBP3	506	46	18811	4.04086	1	0.320255	0.298695
GOTERM_MF_DIRECT	GO:0044183~protein binding involved in protein folding	5	0.974659	0.0277595	CCT3, HSPA5, HSPB1, CCT8, CALR	506	43	18811	4.32278	1	0.2796	0.260777
GOTERM_MF_DIRECT	GO:0005504~fatty acid binding	5	0.974659	0.0184238	FABP5, ACOX1, GSTP1, NME2, ADH5	506	38	18811	4.89156	1	0.200697	0.187186
GOTERM_MF_DIRECT	GO:0051020~GTPase binding	5	0.974659	0.0168321	EPRS1, CLTA, IARS1, LCP1, ENO1	506	37	18811	5.02377	0.999999	0.196455	0.183229
GOTERM_MF_DIRECT	GO:0004601~peroxidase activity	5	0.974659	0.0153293	GPX3, PRDX1, GPX8, EPX, MPO	506	36	18811	5.16332	0.999997	0.181508	0.169289
GOTERM_MF_DIRECT	GO:0023026~MHC class II protein complex binding	5	0.974659	0.00551731	YWHAE, PKM, HLA-DRA, ANXA11, HLA-DPA1	506	27	18811	6.88442	0.989112	0.0790808	0.0737571
GOTERM_MF_DIRECT	GO:0035925~mRNA 3'-UTR AU-rich region binding	5	0.974659	0.00480018	NUDT21, ILF3, HNRNPD, ELAVL1, HNRNPA0	506	26	18811	7.14921	0.98038	0.0739953	0.0690139
GOTERM_MF_DIRECT	GO:0005540~hyaluronic acid binding	5	0.974659	0.00414842	ACAN, VCAN, STAB1, ITIH1, HABP2	506	25	18811	7.43518	0.966503	0.0666986	0.0622085
GOTERM_MF_DIRECT	GO:0050750~low-density lipoprotein particle receptor binding	5	0.974659	0.00414842	APP, APOE, MESD, HSPG2, HSP90B1	506	25	18811	7.43518	0.966503	0.0666986	0.0622085
GOTERM_MF_DIRECT	GO:0017134~fibroblast growth factor binding	5	0.974659	0.00302941	ITGB3, S100A13, ITGAV, RPS2, GLG1	506	23	18811	8.08172	0.916155	0.0538049	0.0501828
GOTERM_MF_DIRECT	GO:0003756~protein disulfide isomerase activity	5	0.974659	0.00176643	ERO1A, TMX3, ITGB3, P4HB, PDIA6	506	20	18811	9.29397	0.764123	0.0360792	0.0336504
GOTERM_MF_DIRECT	GO:0031210~phosphatidylcholine binding	4	0.779727	0.04961	IGHM, APOA2, APOA1, VDAC1	506	31	18811	4.79689	1	0.393508	0.367017
GOTERM_MF_DIRECT	GO:0035255~ionotropic glutamate receptor binding	4	0.779727	0.0349002	FUS, CANX, FLOT1, FLOT2	506	27	18811	5.50754	1	0.320376	0.298809
GOTERM_MF_DIRECT	GO:0005539~glycosaminoglycan binding	4	0.779727	0.0316354	VCAN, BGN, DCN, HABP2	506	26	18811	5.71937	1	0.304072	0.283602
GOTERM_MF_DIRECT	GO:0008143~poly(A) binding	4	0.779727	0.0256122	SYNCRIP, HNRNPDL, DDX1, HNRNPU	506	24	18811	6.19598	1	0.268271	0.250211
GOTERM_MF_DIRECT	GO:0004602~glutathione peroxidase activity	4	0.779727	0.0202695	GPX3, GSTP1, ALOX5AP, GPX8	506	22	18811	6.75925	1	0.215068	0.200589
GOTERM_MF_DIRECT	GO:0031418~L-ascorbic acid binding	4	0.779727	0.0178541	P4HA1, P4HA2, PLOD3, P3H1	506	21	18811	7.08112	1	0.200697	0.187186
GOTERM_MF_DIRECT	GO:0016209~antioxidant activity	4	0.779727	0.0178541	PRDX1, CAT, APOE, S100A9	506	21	18811	7.08112	1	0.200697	0.187186
GOTERM_MF_DIRECT	GO:0034185~apolipoprotein binding	4	0.779727	0.0135323	APP, CANX, PLG, HSPD1	506	19	18811	7.8265	0.999985	0.165014	0.153905
GOTERM_MF_DIRECT	GO:0043395~heparan sulfate proteoglycan binding	4	0.779727	0.0135323	COMP, APP, PTPRC, APOE	506	19	18811	7.8265	0.999985	0.165014	0.153905
GOTERM_MF_DIRECT	GO:0004812~aminoacyl-tRNA ligase activity	4	0.779727	0.00687918	GARS1, QARS1, IARS1, VARS1	506	15	18811	9.91357	0.996446	0.0906498	0.0845473
GOTERM_MF_DIRECT	GO:0044548~S100 protein binding	4	0.779727	0.00561406	AHNAK, ANXA11, ATP2A2, EZR	506	14	18811	10.6217	0.989944	0.0790808	0.0737571
GOTERM_MF_DIRECT	GO:0043394~proteoglycan binding	4	0.779727	0.00561406	COMP, COL2A1, COL5A1, CTSB	506	14	18811	10.6217	0.989944	0.0790808	0.0737571
GOTERM_MF_DIRECT	GO:0030247~polysaccharide binding	4	0.779727	0.00449991	VTN, HLA-DRA, ENPP1, PRG4	506	13	18811	11.4387	0.974896	0.0707005	0.065941
GOTERM_MF_DIRECT	GO:0050786~RAGE receptor binding	4	0.779727	0.00270198	APP, HMGB2, S100A13, S100A9	506	11	18811	13.5185	0.890355	0.0501709	0.0467935
GOTERM_MF_DIRECT	GO:0048407~platelet-derived growth factor binding	4	0.779727	0.00270198	COL1A1, COL2A1, COL5A1, COL6A1	506	11	18811	13.5185	0.890355	0.0501709	0.0467935
GOTERM_MF_DIRECT	GO:0016747~transferase activity, transferring acyl groups other than amino-acyl groups	3	0.584795	0.0461376	ACAA2, SCP2, ACAT1	506	13	18811	8.57905	1	0.376944	0.351568
GOTERM_MF_DIRECT	GO:0031994~insulin-like growth factor I binding	3	0.584795	0.0461376	ITGB3, ITGAV, ITGA6	506	13	18811	8.57905	1	0.376944	0.351568
GOTERM_MF_DIRECT	GO:0008035~high-density lipoprotein particle binding	3	0.584795	0.0461376	APOA2, APOA1, HSPD1	506	13	18811	8.57905	1	0.376944	0.351568
GOTERM_MF_DIRECT	GO:0008429~phosphatidylethanolamine binding	3	0.584795	0.0397318	ANXA11, PEBP1, MFGE8	506	12	18811	9.29397	1	0.349041	0.325544
GOTERM_MF_DIRECT	GO:0001851~complement component C3b binding	3	0.584795	0.0336984	ITGAM, CFHR1, ITGB2	506	11	18811	10.1389	1	0.316455	0.295151
GOTERM_MF_DIRECT	GO:0016504~peptidase activator activity	3	0.584795	0.0336984	APP, PCOLCE, FBLN2	506	11	18811	10.1389	1	0.316455	0.295151
GOTERM_MF_DIRECT	GO:0005528~FK506 binding	3	0.584795	0.0280627	FKBP10, FKBP7, FKBP3	506	10	18811	11.1528	1	0.2796	0.260777
GOTERM_MF_DIRECT	GO:0002161~aminoacyl-tRNA editing activity	3	0.584795	0.0280627	AARS1, IARS1, VARS1	506	10	18811	11.1528	1	0.2796	0.260777
GOTERM_MF_DIRECT	GO:0005522~profilin binding	3	0.584795	0.0280627	VASP, CTTN, ACTG1	506	10	18811	11.1528	1	0.2796	0.260777
GOTERM_MF_DIRECT	GO:0001849~complement component C1q binding	3	0.584795	0.0180913	APCS, CD93, CALR	506	8	18811	13.941	1	0.200697	0.187186
GOTERM_MF_DIRECT	GO:0015662~ATPase activity, coupled to transmembrane movement of ions, phosphorylative mechanism	3	0.584795	0.0138119	ATP13A1, ATP2A3, ATP2A2	506	7	18811	15.9325	0.999988	0.165946	0.154775
GOTERM_MF_DIRECT	GO:0060228~phosphatidylcholine-sterol O-acyltransferase activator activity	3	0.584795	0.0100431	APOA2, APOA1, APOE	506	6	18811	18.5879	0.999738	0.126234	0.117736
GOTERM_MF_DIRECT	GO:0004656~procollagen-proline 4-dioxygenase activity	3	0.584795	0.0068161	P4HA1, P4HA2, P4HB	506	5	18811	22.3055	0.996257	0.0906498	0.0845473
GOTERM_MF_DIRECT	GO:0038132~neuregulin binding	3	0.584795	0.0068161	ITGB3, ITGAV, ITGA6	506	5	18811	22.3055	0.996257	0.0906498	0.0845473
GOTERM_MF_DIRECT	GO:0019960~C-X3-C chemokine binding	3	0.584795	0.0068161	ITGB1, ITGB3, ITGAV	506	5	18811	22.3055	0.996257	0.0906498	0.0845473
GOTERM_MF_DIRECT	GO:0016972~thiol oxidase activity	3	0.584795	0.00416356	ERO1A, TMX3, P4HB	506	4	18811	27.8819	0.966917	0.0666986	0.0622085

## Sheet: C-B(BP)
Category	Term	Count	%	PValue	Genes	List Total	Pop Hits	Pop Total	Fold Enrichment	Bonferroni	Benjamini	FDR
GOTERM_BP_DIRECT	GO:0006412~translation	11	9.82143	4.67877e-07	RPS4X, RPS8, RPL23, RPL27A, RPLP0, RPL14, RPSA, RRBP1, RPS11, RPS10, WARS1	108	223	19256	8.79488	0.000397149	0.000198614	0.00019838
GOTERM_BP_DIRECT	GO:0002181~cytoplasmic translation	9	8.03571	3.70727e-08	RPS4X, RPS8, RPL23, RPL27A, RPLP0, RPL14, RPSA, RPS11, RPS10	108	90	19256	17.8296	3.14742e-05	3.14747e-05	3.14376e-05
GOTERM_BP_DIRECT	GO:0015031~protein transport	7	6.25	0.0358132	XPO1, GDI2, ARL6IP5, RRBP1, SLC15A4, HSP90B1, RAB7A	108	439	19256	2.84299	1	1	1
GOTERM_BP_DIRECT	GO:0043161~proteasome-mediated ubiquitin-dependent protein catabolic process	6	5.35714	0.00636744	USP14, PSMD12, PSMD7, PSMC6, PSMD13, PSMA7	108	210	19256	5.09418	0.995587	0.77228	0.77137
GOTERM_BP_DIRECT	GO:0010951~negative regulation of endopeptidase activity	5	4.46429	0.00895762	COL28A1, USP14, SERPINA3, SERPINA4, SERPINB6	108	146	19256	6.10604	0.999519	0.845002	0.844007
GOTERM_BP_DIRECT	GO:0016192~vesicle-mediated transport	5	4.46429	0.0410741	RAB10, ARF1, GDI2, CLTC, AP2A1	108	233	19256	3.8261	1	1	1
GOTERM_BP_DIRECT	GO:0006749~glutathione metabolic process	4	3.57143	0.00226455	GPX1, GSTP1, ARL6IP5, CLIC1	108	47	19256	15.1742	0.854093	0.384521	0.384068
GOTERM_BP_DIRECT	GO:0010592~positive regulation of lamellipodium assembly	4	3.57143	0.000607178	ACTR3, ACTR2, NCKAP1, RAC2	108	30	19256	23.7728	0.402888	0.171831	0.171629
GOTERM_BP_DIRECT	GO:0032869~cellular response to insulin stimulus	4	3.57143	0.0228986	RAB10, PRKDC, GSTP1, PCK2	108	109	19256	6.54298	1	1	1
GOTERM_BP_DIRECT	GO:0045471~response to ethanol	4	3.57143	0.0380357	EEF1B2, RPS4X, ACTR2, GSTP1	108	133	19256	5.36229	1	1	1
GOTERM_BP_DIRECT	GO:0071346~cellular response to interferon-gamma	4	3.57143	0.0177994	ACTR3, ACTR2, KIF5B, ASS1	108	99	19256	7.20389	1	1	1
GOTERM_BP_DIRECT	GO:0006890~retrograde vesicle-mediated transport, Golgi to ER	3	2.67857	0.0326867	RAB6B, ERGIC1, TAPBP	108	51	19256	10.488	1	1	1
GOTERM_BP_DIRECT	GO:0006953~acute-phase response	3	2.67857	0.0227947	SERPINA3, ORM1, ASS1	108	42	19256	12.7354	1	1	1
GOTERM_BP_DIRECT	GO:0007163~establishment or maintenance of cell polarity	3	2.67857	0.0387834	ACTR3, ACTR2, RAC2	108	56	19256	9.55159	1	1	1
GOTERM_BP_DIRECT	GO:0008631~intrinsic apoptotic signaling pathway in response to oxidative stress	3	2.67857	0.00393969	GPX1, DIABLO, ARL6IP5	108	17	19256	31.4641	0.964965	0.557466	0.556809
GOTERM_BP_DIRECT	GO:0019370~leukotriene biosynthetic process	3	2.67857	0.00162828	SYK, LTA4H, PRG3	108	11	19256	48.6263	0.749311	0.345603	0.345196
GOTERM_BP_DIRECT	GO:0034314~Arp2/3 complex-mediated actin nucleation	3	2.67857	0.00844283	ACTR3, ACTR2, ARPC3	108	25	19256	21.3956	0.999252	0.845002	0.844007
GOTERM_BP_DIRECT	GO:0042311~vasodilation	3	2.67857	0.0217871	GPX1, ITGA1, PLOD3	108	41	19256	13.0461	1	1	1
GOTERM_BP_DIRECT	GO:0008356~asymmetric cell division	2	1.78571	0.0328847	ACTR3, ACTR2	108	6	19256	59.4321	1	1	1
GOTERM_BP_DIRECT	GO:0016344~meiotic chromosome movement towards spindle pole	2	1.78571	0.0110828	ACTR3, ACTR2	108	2	19256	178.296	0.999922	0.855393	0.854385
GOTERM_BP_DIRECT	GO:0033206~meiotic cytokinesis	2	1.78571	0.0110828	ACTR3, ACTR2	108	2	19256	178.296	0.999922	0.855393	0.854385
GOTERM_BP_DIRECT	GO:0051653~spindle localization	2	1.78571	0.0274793	ACTR3, ACTR2	108	5	19256	71.3185	1	1	1
GOTERM_BP_DIRECT	GO:0070358~actin polymerization-dependent cell motility	2	1.78571	0.0382604	ACTR3, ARPC3	108	7	19256	50.9418	1	1	1
GOTERM_BP_DIRECT	GO:1900126~negative regulation of hyaluronan biosynthetic process	2	1.78571	0.022044	CLTC, AP2A1	108	4	19256	89.1481	1	1	1

## Sheet: C-B(CC)
Category	Term	Count	%	PValue	Genes	List Total	Pop Hits	Pop Total	Fold Enrichment	Bonferroni	Benjamini	FDR
GOTERM_CC_DIRECT	GO:0005829~cytosol	65	58.0357	6.24386e-12	NCKAP1, EIF4A1, ARF1, RPLP0, CLTC, GDI2, ADIRF, AP2A1, COMT, ARHGAP4, EEF1B2, RPS4X, PSMD7, XPO1, PNP, KIF5B, NAMPT, RAC2, NANS, RPS11, RPS10, ACTR3, ACTR2, GPX1, SYK, RPS8, RPL23, RPSA, PGD, SERPINB6, DNAJC5, DBN1, RAB7A, USP14, PSMD12, DIABLO, PSMD13, PRKDC, GSTP1, UBR4, HSD17B11, NDRG1, PSMA7, HSP90B1, STIP1, CAND1, PCBP1, RPL14, LTA4H, RAB6B, CCT4, PCK2, SURF4, WARS1, ASS1, RAB10, PFKL, PSMC6…	112	5477	20472	2.16927	1.62341e-09	5.41134e-10	4.91183e-10
GOTERM_CC_DIRECT	GO:0070062~extracellular exosome	61	54.4643	2.71176e-29	SCARB2, SERPINA3, NCKAP1, EIF4A1, ORM1, PLVAP, ARF1, RPLP0, CLTC, GDI2, PLOD3, ADIRF, DBI, COMT, SERPINA4, RPS4X, PSMD7, PNP, CRTAC1, NAMPT, RAC2, NANS, RPS11, CLIC1, ACTR3, ACTR2, SSR4, RPS8, RPL23, ITGA1, RPSA, PGD, SERPINB6, SUB1, SRSF7, RAB7A, USP14, PSMD12, GSTP1, A1BG, MACROH2A2, NDRG1, PSMA7, HSP90B1, CAND1, PCBP1, RPL14, LTA4H, S100A11, CCT4, WARS1, ASS1, RAB10, PFKL, PSMC6, EHD4, ARPC3, …	112	2218	20472	5.02702	7.05057e-27	7.05057e-27	6.39975e-27
GOTERM_CC_DIRECT	GO:0005737~cytoplasm	49	43.75	0.000193948	SCARB2, EIF4A1, ARF1, RPLP0, GDI2, ARHGAP4, EEF1B2, TUBA1B, LASP1, XPO1, PNP, KIF5B, NAMPT, RAC2, NANS, RPS11, CLIC1, RPS10, ACTR3, ACTR2, GPX1, SYK, RPS8, RPL23, CLEC11A, RPSA, SERPINB6, MZB1, SRSF7, DBN1, PSMD12, GSTP1, HSD17B11, NDRG1, PSMA7, CAND1, PCBP1, RPL14, S100A11, WARS1, ASS1, PFKL, PSMC6, EHD4, ARPC3, RPL27A, HNRNPD, TPP2, UBA1	112	5570	20472	1.60799	0.0491808	0.00387896	0.0035209
GOTERM_CC_DIRECT	GO:0016020~membrane	46	41.0714	7.90479e-14	SCARB2, EIF4A1, PSMD12, CMAS, PSMD13, PRKDC, RPLP0, GDI2, CLTC, UBR4, RRBP1, AP2A1, COMT, HSP90B1, RPS4X, PSMD7, CAND1, XPO1, KIF5B, PCBP1, RPL14, ARL6IP5, RAC2, RPS11, CLIC1, RPS10, SEC63, ACTR3, ACTR2, GALNT2, RPS8, RPL23, NONO, ITGA1, RPSA, TAPBP, DPM3, PFKL, PSMC6, EHD4, HNRNPUL2, ARPC3, DNAJC5, RPL27A, CALU, ERGIC1	112	2547	20472	3.30119	2.05524e-11	1.02762e-11	9.32765e-12
GOTERM_CC_DIRECT	GO:0005654~nucleoplasm	34	30.3571	0.00509913	PSMD12, CMAS, PSMD13, PRKDC, UBR4, ADIRF, MACROH2A2, SAMHD1, PSMA7, ARHGAP4, RPS4X, PSMD7, CAND1, XPO1, PCBP1, LTA4H, RPS11, RPS10, CCT4, RPS8, RPL23, NONO, RPSA, SDHB, ASS1, PSMC6, HNRNPUL2, SUB1, HNRNPD, TPP2, UBA1, TOP1, SRSF7, ERGIC1	112	3939	20472	1.57774	0.735302	0.0613787	0.055713
GOTERM_CC_DIRECT	GO:0005576~extracellular region	29	25.8929	6.56325e-06	SERPINA3, ORM1, PSMD12, PSMD13, GSTP1, GDI2, A1BG, SERPINA4, COCH, HSP90B1, PSMD7, CAND1, PNP, LTA4H, S100A11, COL28A1, ACTR2, GALNT2, CLEC11A, PRG3, SERPINB6, MFAP5, PFKL, PROC, QPCT, CAPZA1, MZB1, CALU, KLKB1	112	2127	20472	2.49214	0.001705	0.000189605	0.000172103
GOTERM_CC_DIRECT	GO:0005783~endoplasmic reticulum	20	17.8571	1.14648e-05	SSR4, RPS8, SURF4, RPLP0, PLOD3, DBI, RRBP1, HSD17B11, ASS1, TAPBP, HSP90B1, EEF1B2, DPM3, PROC, EHD4, VAPA, RPL27A, CALU, ERGIC1, SEC63	112	1142	20472	3.20115	0.00297643	0.000298085	0.00027057
GOTERM_CC_DIRECT	GO:0005925~focal adhesion	19	16.9643	1.40056e-11	ACTR3, SCARB2, NCKAP1, ACTR2, ARF1, RPS8, RPL23, GDI2, ITGA1, CLTC, RPLP0, HSP90B1, RAB10, RPS4X, LASP1, ARPC3, RAC2, RPS11, RPS10	112	424	20472	8.19087	3.64145e-09	9.10363e-10	8.26329e-10
GOTERM_CC_DIRECT	GO:0005794~Golgi apparatus	14	12.5	0.00772349	GALNT2, GDI2, SURF4, PLOD3, DBI, ARHGAP4, RAB10, STIP1, CAND1, PROC, DNAJC5, CALU, RAB6B, RAB7A	112	1122	20472	2.28075	0.8668	0.0803243	0.0729098
GOTERM_CC_DIRECT	GO:0005789~endoplasmic reticulum membrane	13	11.6071	0.0116711	SCARB2, SSR4, GALNT2, SURF4, PLOD3, TAPBP, HSP90B1, RAB10, DPM3, VAPA, CALU, ARL6IP5, RAC2	112	1052	20472	2.25876	0.952751	0.111487	0.101196
GOTERM_CC_DIRECT	GO:1904813~ficolin-1-rich granule lumen	11	9.82143	1.41641e-09	ACTR2, PSMD12, PFKL, PSMD7, CAND1, PNP, PSMD13, QPCT, GSTP1, LTA4H, A1BG	112	124	20472	16.2149	3.68267e-07	6.13778e-08	5.57122e-08
GOTERM_CC_DIRECT	GO:0034774~secretory granule lumen	11	9.82143	6.73767e-10	SERPINA3, PSMD12, PFKL, PSMD7, CAND1, PNP, PSMD13, GSTP1, GDI2, A1BG, S100A11	112	115	20472	17.4839	1.75179e-07	3.50359e-08	3.18018e-08
GOTERM_CC_DIRECT	GO:0048471~perinuclear region of cytoplasm	10	8.92857	0.0229475	RAB10, ARF1, PLVAP, EHD4, VAPA, GALNT2, KIF5B, CLIC1, NDRG1, HSP90B1	112	763	20472	2.39562	0.997609	0.192463	0.174697
GOTERM_CC_DIRECT	GO:0032991~macromolecular complex	9	8.03571	0.0374448	STIP1, ARF1, XPO1, SYK, PRKDC, RPL23, CLTC, WARS1, HSP90B1	112	703	20472	2.34007	0.999951	0.29502	0.267787
GOTERM_CC_DIRECT	GO:0005840~ribosome	9	8.03571	5.07303e-06	RPS4X, RPS8, RPL23, RPL27A, RPLP0, RPL14, RRBP1, RPS11, RPS10	112	175	20472	9.40041	0.00131812	0.000164873	0.000149654
GOTERM_CC_DIRECT	GO:0022626~cytosolic ribosome	9	8.03571	8.92422e-09	RPS4X, RPS8, RPL23, RPL27A, RPLP0, RPL14, RPSA, RPS11, RPS10	112	77	20472	21.3646	2.32029e-06	3.31471e-07	3.00874e-07
GOTERM_CC_DIRECT	GO:0005788~endoplasmic reticulum lumen	7	6.25	0.00648744	COL28A1, PROC, MZB1, CALU, PLOD3, DBI, HSP90B1	112	306	20472	4.18137	0.815891	0.0733362	0.0665667
GOTERM_CC_DIRECT	GO:0014069~postsynaptic density	6	5.35714	0.0152154	ACTR2, ARF1, RPL23, RPLP0, RPL14, DBN1	112	267	20472	4.10754	0.981434	0.131867	0.119695
GOTERM_CC_DIRECT	GO:0030027~lamellipodium	6	5.35714	0.00395897	ACTR3, ACTR2, NCKAP1, ARPC3, RAC2, DBN1	112	192	20472	5.71205	0.643484	0.0541754	0.0491746
GOTERM_CC_DIRECT	GO:0000502~proteasome complex	6	5.35714	1.43155e-05	USP14, PSMD12, PSMD7, PSMC6, PSMD13, PSMA7	112	57	20472	19.2406	0.00371514	0.000338366	0.000307133
GOTERM_CC_DIRECT	GO:0031982~vesicle	5	4.46429	0.0149401	VAPA, GSTP1, KIF5B, GDI2, CLIC1	112	174	20472	5.25246	0.980034	0.131867	0.119695
GOTERM_CC_DIRECT	GO:1990904~ribonucleoprotein complex	5	4.46429	0.0120063	RPS4X, XPO1, RPS8, RPLP0, HNRNPD	112	163	20472	5.60692	0.95674	0.111487	0.101196
GOTERM_CC_DIRECT	GO:0042470~melanosome	5	4.46429	0.00239693	DNAJC5, CLTC, CALU, HSP90B1, CCT4	112	103	20472	8.87309	0.464176	0.0389501	0.0353547
GOTERM_CC_DIRECT	GO:0022627~cytosolic small ribosomal subunit	5	4.46429	0.000112074	RPS4X, RPS8, RPSA, RPS11, RPS10	112	46	20472	19.868	0.0287203	0.00242826	0.00220412
GOTERM_CC_DIRECT	GO:0072562~blood microparticle	4	3.57143	0.044386	SERPINA3, ORM1, A1BG, CLIC1	112	145	20472	5.04236	0.999993	0.313583	0.284637
GOTERM_CC_DIRECT	GO:0035861~site of double-strand break	4	3.57143	0.0084839	ACTR3, ACTR2, ARPC3, SAMHD1	112	77	20472	9.49536	0.890871	0.084839	0.0770077
GOTERM_CC_DIRECT	GO:0030670~phagocytic vesicle membrane	4	3.57143	0.00760668	RAB10, RAC2, RAB7A, TAPBP	112	74	20472	9.88031	0.86266	0.0803243	0.0729098
GOTERM_CC_DIRECT	GO:0022625~cytosolic large ribosomal subunit	4	3.57143	0.00424118	RPL23, RPL27A, RPLP0, RPL14	112	60	20472	12.1857	0.668807	0.0551354	0.050046
GOTERM_CC_DIRECT	GO:1904724~tertiary granule lumen	4	3.57143	0.00331581	ORM1, QPCT, LTA4H, PRG3	112	55	20472	13.2935	0.578334	0.0507124	0.0460312
GOTERM_CC_DIRECT	GO:0035580~specific granule lumen	3	2.67857	0.0446253	ORM1, QPCT, PRG3	112	62	20472	8.84447	0.999993	0.313583	0.284637
GOTERM_CC_DIRECT	GO:0035577~azurophil granule membrane	3	2.67857	0.039554	VAPA, DNAJC5, SURF4	112	58	20472	9.45443	0.999972	0.302472	0.274551
GOTERM_CC_DIRECT	GO:0036020~endolysosome membrane	3	2.67857	0.00519358	CLTC, AP2A1, SLC15A4	112	20	20472	27.4179	0.741756	0.0613787	0.055713
GOTERM_CC_DIRECT	GO:0022624~proteasome accessory complex	3	2.67857	0.00375712	PSMD12, PSMC6, PSMD13	112	17	20472	32.2563	0.624197	0.0541754	0.0491746
GOTERM_CC_DIRECT	GO:0005885~Arp2/3 protein complex	3	2.67857	0.00155204	ACTR3, ACTR2, ARPC3	112	11	20472	49.8506	0.332251	0.026902	0.0244187
GOTERM_CC_DIRECT	GO:0005838~proteasome regulatory particle	3	2.67857	0.00127436	PSMD12, PSMD7, PSMD13	112	10	20472	54.8357	0.282185	0.0236666	0.021482
GOTERM_CC_DIRECT	GO:0008541~proteasome regulatory particle, lid subcomplex	2	1.78571	0.0425692	PSMD12, PSMD13	112	8	20472	45.6964	0.999988	0.313583	0.284637
GOTERM_CC_DIRECT	GO:0030130~clathrin coat of trans-Golgi network vesicle	2	1.78571	0.0373478	CLTC, AP2A1	112	7	20472	52.2245	0.99995	0.29502	0.267787

## Sheet: C-B(MF)
Category	Term	Count	%	PValue	Genes	List Total	Pop Hits	Pop Total	Fold Enrichment	Bonferroni	Benjamini	FDR
GOTERM_MF_DIRECT	GO:0005515~protein binding	96	85.7143	8.14625e-07	SCARB2, SERPINA3, NCKAP1, EIF4A1, ORM1, PLVAP, ARF1, RPLP0, CLTC, GDI2, PLOD3, ADIRF, AP2A1, ETFA, COMT, ARHGAP4, EEF1B2, RPS4X, TUBA1B, LASP1, PSMD7, XPO1, PNP, CRTAC1, KIF5B, NAMPT, ARL6IP5, RAC2, RPS11, CLIC1, RPS10, SEC63, ACTR3, ACTR2, SYK, RPS8, RPL23, CLEC11A, ITGA1, RPSA, SDHB, TAPBP, DPM3, SUB1, DNAJC5, MZB1, TOP1, SRSF7, ERGIC1, DBN1, RAB7A, USP14, PSMD12, DIABLO, PRKDC, GSTP1, UBR4, MA…	110	12539	18811	1.30926	0.000202821	0.000101421	0.000100199
GOTERM_MF_DIRECT	GO:0003723~RNA binding	31	27.6786	6.48115e-10	EIF4A1, ARF1, PRKDC, RPLP0, GDI2, CLTC, RRBP1, SAMHD1, HSP90B1, RPS4X, STIP1, XPO1, PCBP1, RPL14, LTA4H, RPS11, RPS10, CCT4, SEC63, RPS8, RPL23, NONO, RPSA, ASS1, HNRNPUL2, RPL27A, SUB1, HNRNPD, UBA1, TOP1, SRSF7	110	1470	18811	3.60631	1.61381e-07	1.61381e-07	1.59436e-07
GOTERM_MF_DIRECT	GO:0045296~cadherin binding	10	8.92857	9.30878e-05	LASP1, EHD4, VAPA, PCBP1, KIF5B, CAPZA1, RPL14, CLIC1, NDRG1, DBN1	110	316	18811	5.41168	0.0229134	0.00579472	0.0057249
GOTERM_MF_DIRECT	GO:0005525~GTP binding	9	8.03571	0.00225247	RAB10, ARF1, TUBA1B, EHD4, RAC2, SAMHD1, RAB6B, PCK2, RAB7A	110	399	18811	3.85735	0.429646	0.112173	0.110822
GOTERM_MF_DIRECT	GO:0003735~structural constituent of ribosome	9	8.03571	1.43162e-05	RPS4X, RPS8, RPL23, RPL27A, RPLP0, RPL14, RPSA, RPS11, RPS10	110	189	18811	8.14329	0.00355842	0.00118825	0.00117393
GOTERM_MF_DIRECT	GO:0019904~protein domain specific binding	7	6.25	0.00430523	ARF1, XPO1, VAPA, PRKDC, TOP1, SRSF7, WARS1	110	263	18811	4.55157	0.658469	0.178667	0.176514
GOTERM_MF_DIRECT	GO:0003779~actin binding	6	5.35714	0.0473737	ACTR3, ACTR2, LASP1, ARPC3, CAPZA1, DBN1	110	339	18811	3.02671	0.999994	0.842575	0.832424
GOTERM_MF_DIRECT	GO:0051015~actin filament binding	6	5.35714	0.0100144	ACTR3, ACTR2, LASP1, ARPC3, CAPZA1, DBN1	110	225	18811	4.56024	0.918419	0.311699	0.307944
GOTERM_MF_DIRECT	GO:0003697~single-stranded DNA binding	4	3.57143	0.029272	PCBP1, SUB1, TOP1, SAMHD1	110	115	18811	5.94814	0.999387	0.607395	0.600077
GOTERM_MF_DIRECT	GO:0005200~structural constituent of cytoskeleton	4	3.57143	0.0243197	ACTR3, ACTR2, TUBA1B, ARPC3	110	107	18811	6.39286	0.997824	0.55051	0.543878
GOTERM_MF_DIRECT	GO:0004867~serine-type endopeptidase inhibitor activity	4	3.57143	0.0220295	COL28A1, SERPINA3, SERPINA4, SERPINB6	110	103	18811	6.64113	0.9961	0.548535	0.541926
GOTERM_MF_DIRECT	GO:0050750~low-density lipoprotein particle receptor binding	3	2.67857	0.00914956	CLTC, AP2A1, HSP90B1	110	25	18811	20.5211	0.898604	0.311699	0.307944
GOTERM_MF_DIRECT	GO:0070180~large ribosomal subunit rRNA binding	2	1.78571	0.0342716	RPL23, RPLP0	110	6	18811	57.003	0.999831	0.656433	0.648524
GOTERM_MF_DIRECT	GO:0008781~N-acylneuraminate cytidylyltransferase activity	2	1.78571	0.0115557	CMAS, NANS	110	2	18811	171.009	0.944652	0.319708	0.315856
