# Supplementary material for: Inflammation produced by senescent osteocytes mediates age-related bone loss
Source: Front Immunol. 2023 Feb 6;14:1114006. doi: 10.3389/fimmu.2023.1114006 (PMC9940315; doi:10.3389/fimmu.2023.1114006)
Supplement: Supplementary file 3 [file Table_3.xlsx]

## Sheet: Sheet0
© 2000-2022 QIAGEN. All rights reserved.
Canonical Pathways	B_A	C_A	C_B
EIF2 Signaling	-4.082	-2.84	2.236
Coronavirus Replication Pathway	-3.464	-3.606	N/A
Coronavirus Pathogenesis Pathway	2.558	1.732	-1.633
tRNA Charging	-2.828	-2.828	N/A
Phagosome Formation	1.3	2.683	1.633
Epithelial Adherens Junction Signaling	-2.524	-2.646	N/A
Neuroinflammation Signaling Pathway	2.673	2.496	N/A
Glycolysis I	-2.714	-2.333	N/A
Coagulation System	2.496	2.333	N/A
CLEAR Signaling Pathway	2.294	2.5	N/A
Protein Kinase A Signaling	-2.236	-2.53	N/A
RHOA Signaling	-2.324	-1.414	1
IL-8 Signaling	2.065	2.668	N/A
Gluconeogenesis I	-2.53	-2.121	N/A
Ephrin Receptor Signaling	-0.905	1.633	2
CXCR4 Signaling	1.89	2.449	N/A
Remodeling of Epithelial Adherens Junctions	-2.333	N/A	2
Fcγ Receptor-mediated Phagocytosis in Macrophages and Monocytes	-0.905	1.134	2.236
Regulation of Actin-based Motility by Rho	-0.905	1.342	2
RHOGDI Signaling	1.732	-0.378	-2
RAC Signaling	-0.832	2.236	1
Xenobiotic Metabolism PXR Signaling Pathway	-1.897	-2.121	N/A
Sirtuin Signaling Pathway	-2.6	0	1.414
Th1 Pathway	2	2	N/A
Synaptogenesis Signaling Pathway	-1.964	0	2
Xenobiotic Metabolism AHR Signaling Pathway	-2	-1.89	N/A
LXR/RXR Activation	-2.524	-1.291	N/A
Actin Cytoskeleton Signaling	-0.655	1.069	2
LPS/IL-1 Mediated Inhibition of RXR Function	-2	-1.633	N/A
CSDE1 Signaling Pathway	-1.414	-2.121	N/A
NF-κB Activation by Viruses	1.414	1.89	N/A
Glioma Invasiveness Signaling	1.134	2.121	N/A
Acute Phase Response Signaling	0.277	2.887	N/A
mTOR Signaling	0.707	2.449	N/A
Chemokine Signaling	1.134	2	N/A
Phospholipase C Signaling	1.155	1.897	N/A
Pulmonary Healing Signaling Pathway	0.905	2.121	N/A
Apelin Cardiomyocyte Signaling Pathway	1.342	1.633	N/A
HGF Signaling	0.816	2	N/A
PAK Signaling	0.816	2	N/A
Ferroptosis Signaling Pathway	0.832	1.941	N/A
Integrin Signaling	-0.2	1.698	0.816
HER-2 Signaling in Breast Cancer	0.5	2.121	N/A
Intrinsic Prothrombin Activation Pathway	1.897	0.707	N/A
fMLP Signaling in Neutrophils	-0.577	2	N/A
Actin Nucleation by ARP-WASP Complex	-0.302	2.236	N/A
PPARα/RXRα Activation	-1.508	-1	N/A
Signaling by Rho Family GTPases	-2.183	-0.302	N/A
Hepatic Fibrosis Signaling Pathway	0.688	1.789	N/A
Unfolded protein response	0	2.449	N/A
PTEN Signaling	-0.447	-2	N/A
NAD Signaling Pathway	-1.667	-0.707	N/A
PI3K Signaling in B Lymphocytes	1	1.342	N/A
ERK/MAPK Signaling	0.707	1.633	N/A
Osteoarthritis Pathway	-0.816	-1.508	N/A
AMPK Signaling	-0.632	1.633	N/A
HIPPO signaling	2.236	N/A	N/A
Opioid Signaling Pathway	-1	1.134	N/A
Sucrose Degradation V (Mammalian)	-2	N/A	N/A
Regulation of Cellular Mechanics by Calpain Protease	1	1	N/A
SPINK1 Pancreatic Cancer Pathway	N/A	-2	N/A
Tryptophan Degradation III (Eukaryotic)	-1	-1	N/A
Cell Cycle: G2/M DNA Damage Checkpoint Regulation	-2	N/A	N/A
Natural Killer Cell Signaling	-0.302	1.667	N/A
Xenobiotic Metabolism General Signaling Pathway	0.816	1.134	N/A
Inhibition of ARE-Mediated mRNA Degradation Pathway	-1.89	N/A	N/A
Oxidative Phosphorylation	1.886	0	N/A
ERK5 Signaling	-1.414	0.447	N/A
Paxillin Signaling	-1	0.816	N/A
Wound Healing Signaling Pathway	-0.5	-1.291	N/A
PI3K/AKT Signaling	-1.265	0.378	N/A
Synaptic Long Term Potentiation	0.632	1	N/A
Necroptosis Signaling Pathway	-1.155	0.447	N/A
VEGF Signaling	-1.134	0.447	N/A
Neuroprotective Role of THOP1 in Alzheimer's Disease	0.707	0.816	N/A
NRF2-mediated Oxidative Stress Response	0	1.508	N/A
MSP-RON Signaling In Macrophages Pathway	0.632	0.816	N/A
α-Adrenergic Signaling	0.447	1	N/A
Glutaryl-CoA Degradation	-0.447	-1	N/A
Endometrial Cancer Signaling	0.447	1	N/A
TCA Cycle II (Eukaryotic)	0.447	-1	N/A
P2Y Purigenic Receptor Signaling Pathway	0.447	1	N/A
Pulmonary Fibrosis Idiopathic Signaling Pathway	-0.728	-0.688	N/A
ILK Signaling	0.258	1.155	N/A
GM-CSF Signaling	0.378	1	N/A
G Beta Gamma Signaling	0.378	1	N/A
Ethanol Degradation II	-1.342	N/A	N/A
Spliceosomal Cycle	1.342	N/A	N/A
p70S6K Signaling	0	1.342	N/A
ID1 Signaling Pathway	0.632	0.707	N/A
Cardiac Hypertrophy Signaling (Enhanced)	0	1.265	N/A
Oxytocin Signaling Pathway	0.535	0.707	N/A
Production of Nitric Oxide and Reactive Oxygen Species in Macrophages	0.277	0.905	N/A
Leukocyte Extravasation Signaling	0	1.147	N/A
Agrin Interactions at Neuromuscular Junction	0	1.134	N/A
Semaphorin Neuronal Repulsive Signaling Pathway	-0.535	-0.577	N/A
MSP-RON Signaling In Cancer Cells Pathway	-1.069	0	N/A
Estrogen Receptor Signaling	0	1	N/A
UVC-Induced MAPK Signaling	1	N/A	N/A
CCR3 Signaling in Eosinophils	1	N/A	N/A
14-3-3-mediated Signaling	-1	0	N/A
Neuregulin Signaling	0	1	N/A
Ephrin B Signaling	N/A	1	N/A
Leucine Degradation I	1	N/A	N/A
Crosstalk between Dendritic Cells and Natural Killer Cells	1	N/A	N/A
Estrogen Biosynthesis	N/A	1	N/A
Calcium Transport I	1	N/A	N/A
ERBB4 Signaling	1	N/A	N/A
Sumoylation Pathway	-1	N/A	N/A
HIF1α Signaling	0.218	0.775	N/A
GP6 Signaling Pathway	0.229	-0.728	N/A
Reelin Signaling in Neurons	-0.832	N/A	N/A
Fatty Acid β-oxidation I	0.816	0	N/A
IL-3 Signaling	0.816	N/A	N/A
Role of MAPK Signaling in Promoting the Pathogenesis of Influenza	0	0.816	N/A
CDK5 Signaling	0.816	N/A	N/A
Tumor Microenvironment Pathway	0.302	0.277	N/A
CDC42 Signaling	-0.577	N/A	N/A
Macropinocytosis Signaling	0.447	N/A	N/A
Regulation of eIF4 and p70S6K Signaling	0.447	N/A	N/A
Complement System	-0.447	N/A	N/A
Apelin Adipocyte Signaling Pathway	0	-0.447	N/A
Relaxin Signaling	0.447	N/A	N/A
Renin-Angiotensin Signaling	0.378	N/A	N/A
Aldosterone Signaling in Epithelial Cells	N/A	N/A	N/A
Heme Biosynthesis from Uroporphyrinogen-III I	N/A	N/A	N/A
IGF-1 Signaling	0	N/A	N/A
Guanine and Guanosine Salvage I	N/A	N/A	N/A
Glutathione Biosynthesis	N/A	N/A	N/A
Selenocysteine Biosynthesis II (Archaea and Eukaryotes)	N/A	N/A	N/A
Choline Degradation I	N/A	N/A	N/A
Xanthine and Xanthosine Salvage	N/A	N/A	N/A
Folate Transformations I	N/A	N/A	N/A
Axonal Guidance Signaling	N/A	N/A	N/A
CMP-N-acetylneuraminate Biosynthesis I (Eukaryotes)	0	N/A	N/A
Urea Cycle	N/A	N/A	N/A
Maturity Onset Diabetes of Young (MODY) Signaling	N/A	N/A	N/A
Formaldehyde Oxidation II (Glutathione-dependent)	N/A	N/A	N/A
MSP-RON Signaling Pathway	N/A	N/A	N/A
Glycogen Degradation III	N/A	N/A	N/A
S-adenosyl-L-methionine Biosynthesis	N/A	N/A	N/A
Antigen Presentation Pathway	N/A	N/A	N/A
Purine Ribonucleosides Degradation to Ribose-1-phosphate	N/A	N/A	N/A
Adenine and Adenosine Salvage III	N/A	N/A	N/A
Adenine and Adenosine Salvage I	N/A	N/A	N/A
Hypoxia Signaling in the Cardiovascular System	N/A	N/A	N/A
NAD Salvage Pathway II	N/A	N/A	N/A
Iron homeostasis signaling pathway	N/A	N/A	N/A
Glucocorticoid Receptor Signaling	N/A	N/A	N/A
Inhibition of Matrix Metalloproteases	N/A	N/A	N/A
Cleavage and Polyadenylation of Pre-mRNA	N/A	N/A	N/A
Melatonin Degradation III	N/A	N/A	N/A
γ-glutamyl Cycle	N/A	N/A	N/A
Atherosclerosis Signaling	N/A	N/A	N/A
Telomere Extension by Telomerase	N/A	N/A	N/A
Methionine Degradation I (to Homocysteine)	N/A	N/A	N/A
Virus Entry via Endocytic Pathways	N/A	N/A	N/A
RAN Signaling	N/A	N/A	N/A
Aspartate Degradation II	N/A	N/A	N/A
Glycerol-3-phosphate Shuttle	N/A	N/A	N/A
Sertoli Cell-Sertoli Cell Junction Signaling	N/A	N/A	N/A
BAG2 Signaling Pathway	N/A	N/A	N/A
Prostanoid Biosynthesis	N/A	N/A	N/A
Aryl Hydrocarbon Receptor Signaling	N/A	N/A	N/A
Agranulocyte Adhesion and Diapedesis	N/A	N/A	N/A
Acetyl-CoA Biosynthesis III (from Citrate)	N/A	N/A	N/A
FXR/RXR Activation	N/A	N/A	N/A
Airway Inflammation in Asthma	N/A	N/A	N/A
Superpathway of Serine and Glycine Biosynthesis I	N/A	N/A	N/A
Germ Cell-Sertoli Cell Junction Signaling	N/A	N/A	N/A
Glucose and Glucose-1-phosphate Degradation	N/A	N/A	N/A
L-DOPA Degradation	N/A	N/A	N/A
Huntington's Disease Signaling	N/A	N/A	N/A
Citrulline Degradation	N/A	N/A	N/A
Ethanol Degradation IV	0	N/A	N/A
Phagosome Maturation	N/A	N/A	N/A
TR/RXR Activation	N/A	N/A	N/A
Tight Junction Signaling	N/A	N/A	N/A
Heme Biosynthesis II	N/A	N/A	N/A
NAD Phosphorylation and Dephosphorylation	N/A	N/A	N/A
Granulocyte Adhesion and Diapedesis	N/A	N/A	N/A
GDP-L-fucose Biosynthesis I (from GDP-D-mannose)	N/A	N/A	N/A
Ketolysis	N/A	N/A	N/A
Methylmalonyl Pathway	N/A	N/A	N/A
2-oxobutanoate Degradation I	N/A	N/A	N/A
D-glucuronate Degradation I	N/A	N/A	N/A
Isoleucine Degradation I	0	N/A	N/A
Glycogen Degradation II	N/A	N/A	N/A
Glutamine Biosynthesis I	N/A	N/A	N/A
Estrogen-Dependent Breast Cancer Signaling	N/A	N/A	N/A
Rapoport-Luebering Glycolytic Shunt	N/A	N/A	N/A
Superoxide Radicals Degradation	N/A	N/A	N/A
Endoplasmic Reticulum Stress Pathway	N/A	N/A	N/A
Th2 Pathway	N/A	N/A	N/A
Heme Degradation	N/A	N/A	N/A
Diphthamide Biosynthesis	N/A	N/A	N/A
Urate Biosynthesis/Inosine 5'-phosphate Degradation	N/A	N/A	N/A
Extrinsic Prothrombin Activation Pathway	N/A	N/A	N/A
Dolichyl-diphosphooligosaccharide Biosynthesis	N/A	N/A	N/A
DNA Double-Strand Break Repair by Non-Homologous End Joining	N/A	N/A	N/A
Calcium Signaling	0	N/A	N/A
tRNA Splicing	0	N/A	N/A
Gap Junction Signaling	N/A	N/A	N/A
Lysine Degradation V	0	N/A	N/A
L-glutamine Biosynthesis II (tRNA-dependent)	N/A	N/A	N/A
GDP-glucose Biosynthesis	N/A	N/A	N/A
β-alanine Degradation I	N/A	N/A	N/A
Ketogenesis	N/A	N/A	N/A
Methylglyoxal Degradation I	N/A	N/A	N/A
Valine Degradation I	N/A	N/A	N/A
Noradrenaline and Adrenaline Degradation	N/A	N/A	N/A
Hepatic Fibrosis / Hepatic Stellate Cell Activation	N/A	N/A	N/A
Mevalonate Pathway I	N/A	N/A	N/A
Molecular Mechanisms of Cancer	N/A	N/A	N/A
Biotin-carboxyl Carrier Protein Assembly	N/A	N/A	N/A
Mitochondrial Dysfunction	N/A	N/A	N/A
Semaphorin Signaling in Neurons	N/A	N/A	N/A
Renal Cell Carcinoma Signaling	0	N/A	N/A
Protein Ubiquitination Pathway	N/A	N/A	N/A
Phenylethylamine Degradation I	N/A	N/A	N/A
Pentose Phosphate Pathway (Oxidative Branch)	N/A	N/A	N/A
Granzyme A Signaling	N/A	N/A	N/A
Xenobiotic Metabolism Signaling	N/A	N/A	N/A
NADH Repair	N/A	N/A	N/A
B Cell Development	N/A	N/A	N/A
Citrulline-Nitric Oxide Cycle	N/A	N/A	N/A
NAD Biosynthesis III	N/A	N/A	N/A
IL-12 Signaling and Production in Macrophages	N/A	N/A	N/A
Caveolar-mediated Endocytosis Signaling	N/A	N/A	N/A
Histamine Degradation	0	N/A	N/A
UDP-N-acetyl-D-galactosamine Biosynthesis II	N/A	N/A	N/A
Proline Biosynthesis I	N/A	N/A	N/A
Colanic Acid Building Blocks Biosynthesis	N/A	N/A	N/A
SNARE Signaling Pathway	0	N/A	N/A
Glutathione Redox Reactions I	N/A	N/A	N/A
Role of Tissue Factor in Cancer	N/A	N/A	N/A
Pentose Phosphate Pathway	N/A	N/A	N/A
Glycerol Degradation I	N/A	N/A	N/A
Pyruvate Fermentation to Lactate	N/A	N/A	N/A
Airway Pathology in Chronic Obstructive Pulmonary Disease	N/A	N/A	N/A
Arsenate Detoxification I (Glutaredoxin)	N/A	N/A	N/A
Methylglyoxal Degradation III	N/A	N/A	N/A
IL-4 Signaling	N/A	N/A	N/A
Serine Biosynthesis	N/A	N/A	N/A
Clathrin-mediated Endocytosis Signaling	N/A	N/A	N/A
FAT10 Signaling Pathway	N/A	N/A	N/A
NAD Salvage Pathway III	N/A	N/A	N/A
Arginine Biosynthesis IV	N/A	N/A	N/A
