# Supplementary material for: Inflammation produced by senescent osteocytes mediates age-related bone loss
Source: Front Immunol. 2023 Feb 6;14:1114006. doi: 10.3389/fimmu.2023.1114006 (PMC9940315; doi:10.3389/fimmu.2023.1114006)
Supplement: Supplementary file 4 [file Table_4.xlsx]

## Sheet: Sheet0
© 2000-2022 QIAGEN. All rights reserved.
Upstream Regulators	B-A	C-A	C-B
IL10RA	-3.769	-3.3	N/A
CCR2	-3.683	-3.683	N/A
nitrofurantoin	-3.565	-3.299	N/A
SRF	-3.055	-2.912	N/A
IGF2BP1	-3	-3	N/A
TGFB1	-2.858	-2.655	-1.146
levodopa	-2.683	-2.065	N/A
MRTFB	-2.538	-2.538	N/A
STK11	-2.534	-2.885	N/A
SOX4	-2.53	-2.714	N/A
aflatoxin B1	-2.53	-2.333	N/A
Tgf beta	-2.514	-2.377	N/A
prednisolone	-2.496	-2.111	N/A
GPX1	-2.411	-2.209	N/A
morphine	-2.375	-2.163	N/A
IGF1	-2.297	-1.982	N/A
CCN2	-2.277	-2.277	N/A
NPC1	-2.263	-2.2	N/A
N6AMT1	-2.236	-2.236	N/A
RAB1B	-2.236	-2	N/A
CUX1	-2.236	-2	N/A
NCSTN	-2.236	-2	N/A
verapamil	-2.236	-2	N/A
MLXIPL	-2.236	N/A	N/A
minocycline	-2.219	-2.219	N/A
semaxinib	-2.213	-1.98	N/A
mir-155	-2.207	-2.621	N/A
sunitinib	-2.169	-2.169	N/A
SMAD3	-2.159	-2.507	N/A
ERG	-2.138	-1.265	N/A
D-glucose	-2.128	-2.236	N/A
mir-223	-2.121	-1.89	N/A
TGFBR2	-2.11	-1.954	-1
COP1	-2	-2	N/A
CPXM1	-2	-2	N/A
taxifolin	-2	-2	N/A
TNFAIP3	-2	-2	N/A
ITGA11	-2	-2	N/A
1810019D21Rik	-2	-2	N/A
miR-146a-5p (and other miRNAs w/seed GAGAACU)	-2	-2	N/A
RGS2	-2	-1.342	N/A
INSIG1	-2	-1.342	N/A
BMP2	-1.982	-2.135	N/A
TBXT	-1.982	-1.982	N/A
rifampin	-1.982	-1.982	N/A
SMARCD3	-1.982	-1.982	N/A
CREB3L2	-1.982	N/A	N/A
AIM2	-1.982	N/A	N/A
APOA1	-1.98	-1.98	N/A
tyrphostin AG 1478	-1.98	-1.98	N/A
(+)-MK-801	-1.98	-1.98	N/A
glutamine	-1.964	-1.964	N/A
FNDC5	-1.964	-1.964	N/A
SOD1	-1.964	N/A	N/A
calphostin C	-1.961	-1.961	N/A
CD274	-1.951	-1.951	N/A
PROC	-1.935	-1.935	N/A
TWIST1	-1.923	-1.923	N/A
diethylstilbestrol	-1.909	-1.401	N/A
PTH	-1.907	-1.907	N/A
G protein alpha	-1.89	-1.633	N/A
melatonin	-1.882	-2.099	N/A
CG	-1.848	-2.186	N/A
IL10	-1.825	-2.086	N/A
STAT4	-1.818	-2.03	N/A
MRTFA	-1.751	-1.578	N/A
Go 6976	-1.741	-1.741	N/A
AR	-1.729	-1.618	N/A
ISG15	-1.718	-1.718	N/A
SOX11	-1.718	-1.414	N/A
testosterone	-1.706	N/A	N/A
PTHLH	-1.695	N/A	N/A
NOTCH1	-1.685	-1.781	N/A
BACH1	-1.674	-1.925	N/A
FLCN	-1.667	-1.667	N/A
ZEB2	-1.664	-1.387	N/A
PRL	-1.653	-1.278	N/A
PAX5	-1.633	-2.236	N/A
BRD4	-1.633	-1.633	N/A
DIO3	-1.633	N/A	N/A
POU5F1	-1.622	-1.622	N/A
ETV6-RUNX1	-1.605	-1.39	-2
CD38	-1.605	-1.175	N/A
RPTOR	-1.59	-1.546	N/A
MITF	-1.545	-1.195	N/A
CD44	-1.534	-1.534	N/A
SERPINF1	-1.513	-1.513	N/A
Tcf7	-1.504	-1.504	N/A
SMAD1	-1.501	-1.501	N/A
SREBF1	-1.496	-1.714	N/A
ZFP36	-1.491	-1.491	N/A
SB203580	-1.468	-1.468	N/A
diphenyleneiodonium	-1.457	-1.457	N/A
ciglitazone	-1.455	-1.455	N/A
PIK3CG	-1.446	-0.728	N/A
SLC2A3	-1.432	-1.732	N/A
Bvht	-1.432	-1.067	N/A
COLQ	-1.414	-1.667	N/A
hyaluronic acid	-1.414	-1.414	N/A
epicatechin	-1.408	-1.673	N/A
CTNNB1	-1.407	-1.154	N/A
FGF8	-1.4	-1.671	N/A
dimethylnitrosamine	-1.4	-1.4	N/A
methapyrilene	-1.387	-1.732	N/A
MDK	-1.387	-1.387	N/A
ROCK1	-1.387	-1.387	N/A
folic acid	-1.387	-1.387	N/A
BCL6	-1.387	-0.728	N/A
ESR2	-1.364	-1.578	N/A
bisindolylmaleimide I	-1.352	-1.352	N/A
IL11	-1.342	-1.342	N/A
GRIN1	-1.342	-1.342	N/A
PSME3	-1.342	-1.342	N/A
SIGLEC8	-1.342	-1	N/A
HMOX1	-1.335	-1.083	N/A
Bay 11-7082	-1.271	-1.271	N/A
WNT3A	-1.256	-1.487	N/A
propofol	-1.254	-1.254	N/A
TAZ	-1.244	-1.869	N/A
PD98059	-1.226	-1.397	-1.519
LRP6	-1.225	-1.225	N/A
oleic acid	-1.213	-0.927	N/A
PGR	-1.212	-1.009	N/A
ZBTB16	-1.209	-1.209	N/A
SMAD4	-1.203	-1.203	N/A
mibolerone	-1.201	-0.51	N/A
TGFBR1	-1.195	-1.664	N/A
apigenin	-1.195	-1.195	N/A
CISH	-1.195	-1.195	N/A
pyrrolidine dithiocarbamate	-1.179	-1.179	N/A
BMP4	-1.179	-0.882	N/A
uranyl nitrate	-1.177	-1.539	N/A
MYC	-1.173	-0.42	-0.861
BMP7	-1.172	-1.172	N/A
TGFB3	-1.17	-1.17	N/A
Sn50 peptide	-1.165	-1.165	N/A
IKBKE	-1.156	-0.652	N/A
KLF2	-1.154	-1.154	N/A
N-Ac-Leu-Leu-norleucinal	-1.151	-0.744	N/A
PLCG2	-1.142	-0.551	N/A
ZC3H12A	-1.134	-0.816	1
SALL4	-1.134	-1.633	N/A
TMPRSS2-ERG	-1.134	-1.134	N/A
HMG20A	-1.134	-0.816	N/A
COL5A1	-1.134	-0.707	N/A
KLF11	-1.131	-1.131	N/A
SERPINE1	-1.131	N/A	N/A
JAG1	-1.118	-0.842	N/A
MKNK1	-1.117	-1.36	N/A
WBP2	-1.108	-1.23	N/A
ascorbic acid	-1.108	-1.108	N/A
Il3	-1.103	-1.103	N/A
conjugated linoleic acid	-1.103	N/A	N/A
Mir122a,b	-1.103	N/A	N/A
HSF1	-1.097	-1.097	N/A
5-N-ethylcarboxamido adenosine	-1.095	-1.095	N/A
DUSP1	-1.093	-1.48	N/A
deoxycorticosterone acetate	-1.091	-1.091	N/A
H-[1,2,4]oxadiazolo[4,3-alpha]quinoxalin-1-one	-1.091	-1.091	N/A
isoproterenol	-1.076	-1.076	N/A
lithium chloride	-1.068	-1.475	N/A
CA9	-1.067	-1.067	N/A
NS-398	-1.067	-1.067	N/A
caffeine	-1.067	N/A	N/A
eplerenone	-1.053	-1.053	N/A
irbesartan	-1.039	-1.039	N/A
SNAI1	-1.035	-1.249	N/A
Lh	-1.029	0.946	N/A
ATG5	-1.026	-0.728	N/A
TGFB2	-1.02	-1.02	N/A
BTNL2	-1	-1.342	N/A
BCL2L1	-1	-1	N/A
napabucasin	-1	-1	N/A
RET	-1	-1	N/A
thalidomide	-1	-1	N/A
GNAS	-1	-1	N/A
2-bromoethylamine	-1	-1	N/A
sodium tungstate	-1	-1	N/A
KPNA2	-1	-1	N/A
gefitinib	-1	-1	N/A
NEUROG1	-1	-1	N/A
MEX3A	-1	-1	N/A
NOTCH3	-1	N/A	N/A
ZNF106	-1	N/A	N/A
HSP90B1	-1	N/A	N/A
C3	-0.975	-0.975	N/A
IL1RN	-0.973	-0.973	N/A
pentoxifylline	-0.97	-1.432	N/A
GAST	-0.97	-1.432	N/A
APOE	-0.966	-1.281	N/A
SOX9	-0.962	-0.962	N/A
aspirin	-0.958	-0.958	N/A
Growth hormone	-0.956	-0.956	N/A
glucocorticoid	-0.953	-0.411	N/A
everolimus	-0.943	-0.943	N/A
USP1	-0.927	-0.927	N/A
CDH1	-0.9	-0.9	N/A
PALMD	-0.896	-0.896	N/A
3,4,5,3',4'-pentachlorobiphenyl	-0.896	-0.896	N/A
dinoprost	-0.882	-1.195	N/A
ERBB3	-0.867	-0.925	N/A
CSF1	-0.857	-0.226	N/A
GATA4	-0.825	-0.825	N/A
thioctic acid	-0.817	-0.817	N/A
MAP3K12	-0.816	-1.342	N/A
PRKAA2	-0.816	-0.816	N/A
LGALS1	-0.811	-0.811	N/A
quercetin	-0.792	-0.792	N/A
BMP10	-0.788	-0.788	N/A
SLC15A4	-0.788	-0.788	N/A
andrographolide	-0.784	-0.784	N/A
XBP1	-0.78	-0.556	N/A
26s Proteasome	-0.765	-1.4	N/A
U0126	-0.765	-0.956	N/A
FOXM1	-0.762	-0.762	N/A
15-deoxy-delta-12,14 -PGJ 2	-0.756	-0.756	0.577
LY294002	-0.754	-0.587	-1.109
PTK2	-0.75	-0.75	N/A
NR1H4	-0.743	-0.71	N/A
phenylbutazone	-0.739	-0.739	N/A
SIRT1	-0.736	-0.555	N/A
SP1	-0.735	-0.735	N/A
CDKN1B	-0.726	-0.726	N/A
HTT	-0.714	-1.667	N/A
TCF4	-0.707	-0.707	N/A
ammonium	-0.707	-0.707	N/A
filgrastim	-0.696	-1.544	N/A
methamphetamine	-0.691	-0.408	N/A
ERBB4	-0.674	-0.674	N/A
NFATC1	-0.673	N/A	N/A
HOXA10	-0.667	-0.667	N/A
CITED2	-0.666	-0.408	N/A
Y 27632	-0.651	-0.651	N/A
Insulin	-0.648	-0.712	N/A
androgen	-0.64	-0.64	N/A
acetaminophen	-0.638	-0.231	-1.067
mifepristone	-0.632	-0.714	N/A
FOXC1	-0.632	-0.632	N/A
NKX2-3	-0.632	-0.333	N/A
MEF2C	-0.618	-0.298	N/A
H89	-0.596	-0.978	N/A
AGT	-0.585	-0.639	2.176
N-acetyl-L-cysteine	-0.58	-1.192	N/A
TFRC	-0.577	-0.905	-0.447
PP2/AG1879 tyrosine kinase inhibitor	-0.577	-0.577	N/A
L-arginine	-0.577	N/A	N/A
enalapril	-0.572	-0.235	N/A
FOXC2	-0.57	-0.57	N/A
Pkc(s)	-0.555	-0.555	N/A
mannitol	-0.555	-0.555	N/A
resveratrol	-0.551	-0.797	N/A
NR1H3	-0.55	-0.908	N/A
methylprednisolone	-0.55	-0.695	N/A
fluticasone propionate	-0.525	-0.525	N/A
GRN	-0.524	-0.524	N/A
SREBF2	-0.522	-0.824	N/A
COL18A1	-0.522	-0.522	N/A
lactacystin	-0.518	-0.155	N/A
GDF2	-0.513	-0.513	N/A
Z-LLL-CHO	-0.507	-0.531	N/A
RUNX1	-0.498	-0.069	N/A
valsartan	-0.497	-0.497	N/A
STEAP3	-0.493	-0.156	N/A
VDR	-0.492	-0.841	N/A
ERBB2	-0.487	-0.317	N/A
PLX5622	-0.478	-0.478	N/A
GATA6	-0.478	-0.113	N/A
ionomycin	-0.477	-0.477	N/A
GLI1	-0.469	-0.042	N/A
vancomycin	-0.465	-0.465	N/A
FBXW7	-0.456	-0.456	N/A
HAVCR1	-0.447	-0.447	N/A
hydroxypropyl-beta-cyclodextrin	-0.447	-0.447	N/A
trichloroethylene	-0.447	-0.447	N/A
benzene	-0.447	-0.447	N/A
FOXA2	-0.447	-0.447	N/A
fluoride	-0.447	0	N/A
NRAS	-0.426	-0.378	N/A
IGF1R	-0.42	-0.42	N/A
PPARD	-0.416	-0.416	N/A
atorvastatin	-0.411	-0.759	N/A
CREBBP	-0.396	-0.104	N/A
peoniflorin	-0.392	-0.392	N/A
LGALS3	-0.391	-0.391	N/A
SCX	-0.391	-0.391	N/A
ABCB7	-0.391	0.152	N/A
FGF1	-0.386	-0.386	N/A
KL	-0.385	-0.385	N/A
SHC1	-0.384	0.374	N/A
Esrra	-0.378	-0.816	N/A
RB1	-0.378	0	N/A
ERN1	-0.378	0	N/A
HRAS	-0.377	0.395	N/A
ADCYAP1	-0.36	-0.676	N/A
trans-hydroxytamoxifen	-0.359	-0.653	N/A
IREB2	-0.359	-0.359	N/A
FGF2	-0.348	-0.032	N/A
TP53	-0.346	-1.133	N/A
MYOCD	-0.343	0	N/A
sulforafan	-0.342	-0.342	N/A
ACSL4	-0.342	-0.342	N/A
IL15	-0.332	-0.844	N/A
ESR1	-0.331	-0.331	N/A
ERK1/2	-0.323	0.067	N/A
aldosterone	-0.322	-0.322	N/A
ESRRA	-0.321	-0.541	N/A
BDNF	-0.316	-0.093	N/A
EPO	-0.314	0.218	N/A
TCF7L2	-0.3	-0.326	N/A
dimethyl sulfoxide	-0.294	-0.294	N/A
THRA	-0.294	-0.294	N/A
cyclosporin A	-0.292	-0.489	N/A
cuprizone	-0.282	-0.543	N/A
UCP1	-0.277	-1.211	N/A
TSC1	-0.277	-0.647	N/A
LMO2	-0.277	-0.577	N/A
LDB1	-0.277	-0.577	N/A
FGF10	-0.277	-0.277	N/A
dexamethasone	-0.272	-0.074	2.211
progesterone	-0.269	-0.172	N/A
rottlerin	-0.266	-0.266	N/A
CXCR3	-0.254	-0.254	N/A
ELANE	-0.254	N/A	N/A
valproic acid	-0.244	-0.255	N/A
DDX58	-0.243	-0.651	N/A
5-azacytidine	-0.24	-0.24	N/A
KDM1A	-0.239	-0.239	N/A
NFAT5	-0.239	0.128	N/A
miR-145-5p (and other miRNAs w/seed UCCAGUU)	-0.232	-0.232	N/A
trinitrobenzenesulfonic acid	-0.225	0.072	N/A
JUN	-0.223	-0.422	N/A
tanespimycin	-0.218	-0.625	N/A
FGFR2	-0.218	-0.218	N/A
ACOX1	-0.218	-0.218	N/A
TGFA	-0.218	-0.218	N/A
acetovanillone	-0.218	N/A	N/A
GnRH analog	-0.213	0.389	N/A
fulvestrant	-0.213	-0.213	N/A
simvastatin	-0.21	0.003	N/A
glutathione	-0.2	-1	N/A
TFAP2A	-0.2	-0.2	N/A
ITGB3	-0.195	-0.195	N/A
nitric oxide	-0.195	-0.195	N/A
ABCA1	-0.191	-0.191	N/A
tetrachlorodibenzodioxin	-0.189	0.156	N/A
IHH	-0.186	-0.186	N/A
mir-21	-0.181	-0.293	N/A
AGER	-0.169	0.392	N/A
FLI1	-0.156	-0.156	N/A
nelfinavir	-0.152	-0.555	N/A
E2F1	-0.152	-0.437	N/A
HPX	-0.152	-0.152	N/A
HDL	-0.152	-0.152	N/A
olanzapine	-0.152	N/A	N/A
BRD2	-0.152	N/A	N/A
zoledronic acid	-0.152	N/A	N/A
KEAP1	-0.152	N/A	N/A
celecoxib	-0.14	-0.489	N/A
puromycin aminonucleoside	-0.137	-0.137	N/A
NF2	-0.132	-0.132	N/A
PDGFB	-0.129	-0.129	N/A
MAP2K3	-0.129	N/A	N/A
triamterene	-0.128	-0.128	N/A
fenamic acid	-0.128	-0.128	N/A
ethanol	-0.127	1.133	N/A
IL32	-0.127	0.201	N/A
YAP1	-0.126	-0.629	0.218
GDF11	-0.119	N/A	N/A
herbimycin	-0.117	-0.117	N/A
monocrotaline	-0.115	-0.115	N/A
NR1H2	-0.108	-0.108	N/A
cerivastatin	-0.106	-0.106	N/A
bezafibrate	-0.097	-0.097	N/A
VCAN	-0.093	0.18	N/A
staurosporine	-0.067	-0.55	N/A
MYCN	-0.063	0.724	N/A
TCR	-0.047	0.692	N/A
MYB	-0.046	-0.728	N/A
prostaglandin E2	-0.045	-0.045	N/A
IL13	-0.032	-0.153	N/A
HIF1A	-0.021	0.093	N/A
metribolone	-0.015	-0.239	N/A
LDLR	0	-0.577	N/A
4-hydroxynonenal	0	0.492	N/A
clopidogrel	0	0.447	N/A
RHO	0	-0.447	N/A
elaidic acid	0	-0.447	N/A
propylthiouracil	0	-0.447	N/A
GABA	0	0.243	N/A
ciprofloxacin	0	-0.164	N/A
lomustine	0	0	N/A
TIMP3	0	0	N/A
kanamycin A	0	0	N/A
carbenoxolone	0	0	N/A
nimesulide	0	0	N/A
2,3,4,7,8-pentachlorodibenzofuran	0	0	N/A
inosine	0	0	N/A
aprepitant	0	0	N/A
HCAR1	0	0	N/A
rotenone	0	0	N/A
tetrathiomolybdate	0	0	N/A
HOXD3	0	0	N/A
ANXA7	0	0	N/A
colistin	0	0	N/A
PTN	0	N/A	N/A
methylmercury	0	0	N/A
NSUN6	0	0	N/A
rifaximin	0	N/A	N/A
tempol	0	0	N/A
mycophenolic acid	0	0	N/A
PLCG1	0	0	N/A
metronidazole	0	0	N/A
HDL-cholesterol	0	N/A	N/A
allopurinol	0	0	N/A
gentamicin C	0	0	N/A
geldanamycin	0	0	N/A
PTPN3	0	0	N/A
delta-9-tetrahydrocannabinol	0	0	N/A
zinc	0	0	N/A
ADRB	0	0	N/A
ELOVL3	0	0	N/A
PLG	0	0	N/A
MAFG	0	0	N/A
LTBR	0	0	N/A
AQP1	0	0	N/A
PRKAA1	0	0	N/A
STAT6	0.008	0.008	N/A
TO-901317	0.009	0.009	N/A
WNT5A	0.046	0.046	N/A
NRG1	0.062	-0.398	1.974
calcitriol	0.062	0.257	N/A
TCF3	0.074	0.543	N/A
cycloheximide	0.094	-0.181	N/A
thioacetamide	0.101	0.101	N/A
desoxycorticosterone	0.108	0.108	N/A
NR4A2	0.109	0.397	N/A
CIP2A	0.113	0.113	N/A
carboplatin	0.113	0.113	N/A
CNR1	0.128	0.555	N/A
Hbb-b1	0.13	0.13	N/A
luteolin	0.13	0.13	N/A
TRAF6	0.132	0.132	N/A
bleomycin	0.139	0.469	N/A
KLF4	0.142	-0.148	N/A
baicalein	0.152	0.152	N/A
AS1842856	0.152	0.152	N/A
FBXO32	0.152	N/A	N/A
MECP2	0.152	N/A	N/A
PARK7	0.152	N/A	N/A
miR-199a-5p (and other miRNAs w/seed CCAGUGU)	0.156	0.156	N/A
PPARG	0.159	-0.426	N/A
diclofenac	0.16	-0.245	N/A
mono-(2-ethylhexyl)phthalate	0.164	-0.447	N/A
TSC2	0.179	-0.181	N/A
CCN1	0.179	0.179	N/A
fenofibrate	0.188	0.188	-1.961
INSR	0.194	0.194	N/A
SP3	0.205	0.205	N/A
dihydrotestosterone	0.206	0.513	N/A
SP600125	0.214	-0.369	N/A
VHL	0.217	0.217	N/A
SMPD1	0.218	0.218	N/A
chloroquine	0.218	N/A	N/A
resatorvid	0.232	0.232	N/A
GDNF	0.24	0.24	N/A
FSH	0.242	0.592	N/A
AMPK	0.246	0.246	N/A
BCR (complex)	0.251	-0.323	N/A
carvedilol	0.254	0.254	N/A
KDM3A	0.254	0.254	N/A
PML	0.258	-0.14	N/A
Ige	0.262	0.308	N/A
PRDM1	0.264	-0.306	1.342
SMARCA4	0.275	0.291	N/A
KLF1	0.277	0.277	N/A
phenacetin	0.277	0.277	N/A
ibuprofen	0.277	0.277	N/A
EZH2	0.279	0.279	N/A
GSTO1	0.283	0.651	N/A
WWTR1	0.283	N/A	N/A
paclitaxel	0.287	0	N/A
IL5	0.292	0.292	N/A
NR3C2	0.294	-0.063	N/A
vorinostat	0.296	0.296	N/A
TNFRSF1A	0.297	0.297	N/A
Gsk3	0.298	0.298	N/A
TET2	0.303	0.303	N/A
N(G)-monomethyl-D-arginine	0.314	0.314	N/A
THRB	0.321	-0.075	N/A
CREB3	0.326	N/A	N/A
sodium chloride	0.331	0.331	N/A
metformin	0.333	0.333	N/A
MTOR	0.339	-0.529	N/A
diethylnitrosamine	0.342	0.728	N/A
TNFSF11	0.344	0.762	N/A
IKBKG	0.352	0.29	N/A
CXCL12	0.366	0.842	N/A
BHLHE40	0.37	0.606	N/A
MAPK1	0.37	0.172	N/A
beta-naphthoflavone	0.371	0.371	N/A
heparin	0.372	0.372	N/A
streptozocin	0.373	-0.146	N/A
MSTN	0.377	0.753	N/A
RBM20	0.378	0.816	N/A
CPT1B	0.378	0.378	N/A
PNPLA2	0.387	0.387	N/A
KAT2B	0.391	0.391	N/A
BAX	0.391	N/A	N/A
EGF	0.394	0.394	0.277
Immunoglobulin	0.402	0.583	-1.432
decitabine	0.404	0.222	N/A
CST5	0.407	0.168	N/A
actinomycin D	0.409	0.649	N/A
ARNT	0.416	0.099	N/A
ciprofibrate	0.425	0.425	N/A
SP2509	0.429	-0.143	N/A
LCN2	0.44	1.091	N/A
RAF1	0.44	0.44	N/A
Nfat (family)	0.447	1	N/A
SAA1	0.447	1	N/A
AZ-1	0.447	0.816	N/A
ILF3	0.447	0.816	N/A
MIR17HG	0.447	0.447	N/A
SLC13A1	0.447	0.447	N/A
IRF4	0.447	0.447	N/A
MNT	0.447	0.447	N/A
ADGRE2	0.447	0.447	N/A
nickel chloride	0.447	-0.128	N/A
PLA2R1	0.447	0	N/A
CD300LF	0.447	0	N/A
caffeic acid phenethyl ester	0.45	0.45	N/A
cholecalciferol	0.46	0.789	N/A
AGN194204	0.466	0.18	N/A
ATF4	0.473	0.473	N/A
Ccl2	0.485	1.109	N/A
MAPK8	0.487	0.834	N/A
CAT	0.489	0.489	N/A
cholesterol	0.49	1.699	N/A
BMPR2	0.492	N/A	N/A
deferoxamine	0.501	0.501	N/A
arachidonic acid	0.505	0.505	N/A
mir-122	0.526	0.106	N/A
MUC1	0.532	0.532	N/A
CHUK	0.533	0.541	N/A
Collagen type I (complex)	0.537	0.537	N/A
FOS	0.541	0.318	N/A
IKZF1	0.546	0.296	N/A
Ifn	0.555	0.152	N/A
EP300	0.557	0.557	N/A
ZEB1	0.557	0.557	N/A
nicotine	0.557	0.066	N/A
ELAVL1	0.562	0.106	N/A
4-phenylbutyric acid	0.563	0.647	N/A
raloxifene	0.577	0.302	N/A
IFN Beta	0.581	0.222	N/A
AKT1	0.583	0.303	N/A
SMAD7	0.587	0.846	N/A
Mek	0.588	1.258	N/A
beta-estradiol	0.592	0.471	N/A
bexarotene	0.593	0.836	N/A
FOXO1	0.593	0.618	N/A
concanavalin a	0.6	0.6	N/A
N-nitro-L-arginine methyl ester	0.621	0.621	N/A
FOXO4	0.63	0.63	N/A
FLT1	0.632	1	N/A
Sb202190	0.637	0.637	N/A
CALCA	0.64	N/A	N/A
curcumin	0.641	0.641	N/A
HGF	0.642	0.305	N/A
COL9A1	0.647	0.647	N/A
phorbol esters	0.651	1.131	N/A
isobutylmethylxanthine	0.651	0.243	N/A
AICAR	0.652	0.359	N/A
eicosapentenoic acid	0.655	0.655	N/A
rosiglitazone	0.659	0.464	-0.991
HNF4A	0.66	0.685	N/A
S100A8	0.664	0.664	N/A
ADIPOQ	0.668	0.668	N/A
NFKBIA	0.67	0.378	N/A
IL6R	0.68	1.104	N/A
4-(2-aminoethyl)benzenesulfonylfluoride	0.685	0.685	N/A
CUL3	0.686	0.686	N/A
RAS	0.686	0.686	N/A
tazemetostat	0.687	0.137	N/A
estrogen	0.692	0.692	N/A
Pdgf (complex)	0.692	0.692	N/A
IL4	0.703	0.433	0.447
STAT3	0.706	0.871	1.964
IRF2	0.707	0.707	N/A
CD 437	0.707	0.378	N/A
KDM5A	0.707	0.378	N/A
let-7a-5p (and other miRNAs w/seed GAGGUAG)	0.711	1.018	N/A
PSEN1	0.718	0.798	N/A
TNFSF13B	0.728	0.728	N/A
KDM8	0.728	0	N/A
phytohemagglutinin	0.731	0.505	N/A
NCOA3	0.742	0.742	N/A
NR1I3	0.747	0.747	N/A
CEBPA	0.758	0.802	1.98
LIF	0.761	0.342	N/A
fluoromethyl 2,2-difluoro-1-(trifluoromethyl)vinyl ether	0.762	0.762	N/A
C5AR1	0.762	0.762	N/A
imatinib	0.765	1.195	N/A
troglitazone	0.774	0.604	N/A
ferric ammonium citrate	0.775	0.775	N/A
1,2-dithiol-3-thione	0.783	0.835	N/A
TXNIP	0.79	1.082	N/A
wortmannin	0.791	1.104	N/A
PPARA	0.794	0.967	-1.969
tunicamycin	0.795	1.112	N/A
tyrphostin AG490	0.796	0.084	N/A
corticosterone	0.799	0.799	N/A
medroxyprogesterone acetate	0.808	0.434	1
mir-1	0.808	0.728	N/A
hemin	0.811	1.529	N/A
RXRA	0.815	0.815	N/A
LAMA4	0.816	1.134	N/A
ibrutinib	0.816	1.134	N/A
MAP3K8	0.816	0.816	N/A
hexachlorobenzene	0.816	0.816	N/A
ADAM10	0.816	0.378	N/A
SIX1	0.816	N/A	N/A
NR4A1	0.819	0.819	N/A
PTGS2	0.823	1.169	N/A
sodium bisulfide	0.832	0.832	N/A
SRC	0.835	0.835	N/A
NAMPT	0.842	0.842	N/A
SPP1	0.845	0.845	N/A
S-adenosylmethionine	0.849	N/A	N/A
trichostatin A	0.851	0.978	N/A
captopril	0.853	0.853	N/A
KLF6	0.856	0.773	N/A
PTEN	0.856	0.696	N/A
SIRT3	0.861	0.861	N/A
alitretinoin	0.863	0.863	N/A
PCGEM1	0.873	-0.366	N/A
hydrocortisone	0.876	0.876	N/A
TNFSF10	0.877	0.642	N/A
FGF21	0.887	0.887	N/A
TP73	0.889	0.23	N/A
doxorubicin	0.892	1.219	N/A
PIK3R1	0.896	0.896	N/A
6-hydroxydopamine	0.896	0.896	N/A
TRAP1	0.896	0.788	N/A
Hif1	0.896	0.478	N/A
pirinixic acid	0.903	1.248	N/A
PSMB11	0.905	0.905	N/A
PTP4A1	0.905	0.905	N/A
LEP	0.917	1.332	N/A
EGLN	0.92	1.206	N/A
MYD88	0.923	1.26	N/A
SDCBP	0.924	0.924	N/A
8-bromo-cAMP	0.925	0.589	N/A
AHR	0.933	1.314	N/A
QKI	0.933	1.309	N/A
TLR4	0.936	1.525	N/A
FOXO3	0.94	0.94	-2
IFNA2	0.941	0.613	N/A
tacrolimus	0.946	1.406	N/A
BCR-ABL1	0.956	0.956	N/A
INHA	0.956	0.64	N/A
tert-butyl-hydroquinone	0.976	0.65	N/A
ADAM12	0.99	0.664	N/A
phosphate	0.993	0.346	N/A
KLF3	1	1.291	N/A
CDKN2A	1	1.134	N/A
PRMT1	1	1	N/A
spironolactone	1	1	N/A
CSF1R	1	1	N/A
HNRNPK	1	1	N/A
SKIV2L	1	1	N/A
ARHGAP31	1	1	N/A
T3-TR-RXR	1	1	N/A
RGS4	1	1	N/A
RARB	1	1	N/A
amiodarone	1	1	N/A
8-bromoguanosine 3',5'-cyclic monophosphate	1	1	N/A
mir-210	1	1	N/A
Cdc42	1	1	N/A
HBEGF	1	1	N/A
SMAD2	1	0.6	N/A
TFAM	1	0.447	N/A
SFLLRN (PAR1-activator)	1	0.447	N/A
MAFB	1	0.218	N/A
TRIM2	1	N/A	N/A
5-fluorouracil	1	N/A	N/A
IKBKB	1.002	1.207	N/A
STAT1	1.002	1.002	N/A
gentamicin	1.002	0.82	N/A
Interferon alpha	1.006	0.836	N/A
CX3CL1	1.014	0.689	N/A
tamoxifen	1.016	0.492	N/A
paraquat	1.023	1.333	N/A
IL1B	1.028	1.535	-0.293
HNF1A	1.035	1.373	N/A
NFE2L2	1.042	0.885	N/A
ATG7	1.044	1.386	N/A
resiquimod	1.044	1.044	N/A
gemfibrozil	1.06	N/A	N/A
EDN1	1.061	1.061	N/A
GATA1	1.066	1.891	1.71
ASPSCR1-TFE3	1.066	1.066	N/A
docosahexaenoic acid	1.066	1.066	N/A
CLDN7	1.066	0.788	N/A
MMP9	1.067	1.491	N/A
mir-30	1.067	1.067	N/A
TXN	1.067	1.067	N/A
NEDD9	1.067	1.067	N/A
ethionine	1.067	1.067	N/A
crizotinib	1.067	0.555	N/A
MFAP5	1.067	N/A	N/A
DMD	1.067	N/A	N/A
NR3C1	1.071	0.855	N/A
dextran sulfate	1.076	1.076	N/A
NOX4	1.083	1.083	N/A
EGFR	1.093	1.836	N/A
SENP2	1.103	1.103	N/A
cisplatin	1.107	0.965	0.537
methotrexate	1.109	1.416	N/A
butyric acid	1.119	1.911	N/A
pyrophosphate	1.121	1.121	N/A
IgG	1.122	1.697	N/A
THPO	1.124	1.124	N/A
IFNB1	1.126	0.48	N/A
Brd4	1.127	0.834	N/A
CBFB	1.131	1.131	N/A
SNAI2	1.131	1.131	N/A
LDL	1.134	1.561	N/A
SYVN1	1.134	1.134	N/A
CD40	1.139	0.851	N/A
PLAU	1.154	1.154	N/A
Alpha catenin	1.154	1.104	N/A
molybdenum disulfide	1.155	2.111	N/A
CNTF	1.155	1.265	N/A
ARNT2	1.155	0.632	N/A
RAC1	1.158	1.158	N/A
PRKCD	1.16	1.16	N/A
niacinamide	1.172	0.728	N/A
Pro-inflammatory Cytokine	1.177	1.177	N/A
NR4A3	1.192	1.192	N/A
camptothecin	1.192	1.043	N/A
eflornithine	1.195	1.195	N/A
epigallocatechin-gallate	1.198	0.976	N/A
norepinephrine	1.213	0.976	N/A
daidzein	1.219	1.671	N/A
Creb	1.229	1.572	N/A
cephaloridine	1.231	1.231	N/A
TRAF3IP2	1.231	1.231	N/A
ADORA2A	1.238	0.213	N/A
Akt	1.253	1.699	N/A
CCL5	1.254	1.254	N/A
estradiol-17beta-benzoate	1.257	1.36	N/A
S100A9	1.258	1.258	N/A
SIM1	1.265	0.707	N/A
NPM1	1.272	1.272	N/A
ETV5	1.276	1.706	N/A
ETS2	1.276	1.706	N/A
ETS1	1.303	1.303	-0.038
OLR1	1.308	1.308	N/A
Jnk	1.308	1.308	N/A
DKK1	1.316	1.316	N/A
PDX1	1.32	1.32	N/A
EPAS1	1.321	1.321	N/A
bucladesine	1.325	0.933	N/A
CDKN1A	1.335	0.607	N/A
APLN	1.342	2	N/A
torin1	1.342	1.89	N/A
USP22	1.342	1.342	N/A
Collagen(s)	1.342	1.342	N/A
GABARAPL1	1.342	1.342	N/A
GABARAP	1.342	1.342	N/A
KIN001-043	1.342	1.342	N/A
GABARAPL2	1.342	1.342	N/A
EHF	1.342	1	N/A
ITGB1	1.343	0.65	N/A
IL1A	1.359	2.141	N/A
Ca2+	1.363	1.081	N/A
STAT5B	1.364	1.152	N/A
KDM6A	1.387	1.387	N/A
17-alpha-ethinylestradiol	1.387	1.387	N/A
DETA-NONOate	1.396	1.396	N/A
CEBPB	1.397	0.962	N/A
pioglitazone	1.398	1.446	N/A
halofuginone	1.4	1.091	N/A
PSEN2	1.4	N/A	N/A
hydrogen peroxide	1.405	1.831	N/A
5-O-mycolyl-beta-araf-(1->2)-5-O-mycolyl-alpha-araf-(1->1')-glycerol	1.406	1.406	N/A
F3	1.406	1.406	N/A
Pam3-Cys	1.41	1.41	N/A
IL3	1.412	1.715	N/A
cyclophosphamide	1.414	1.89	N/A
KRAS	1.427	1.701	N/A
IL1R1	1.432	1.98	N/A
E. coli B5 lipopolysaccharide	1.434	1.434	N/A
NOS2	1.436	1.799	N/A
NFKB2	1.446	1.446	N/A
WT1	1.466	1.188	N/A
THBS4	1.467	1.467	N/A
ILK	1.467	1.467	N/A
CpG oligonucleotide	1.467	1.188	N/A
CCR1	1.471	2.2	N/A
genistein	1.476	1.807	N/A
MAP2K1	1.476	1.476	N/A
mir-133	1.476	1.476	N/A
PTPN11	1.477	1.192	N/A
PKM	1.489	0.843	N/A
Pkg	1.503	1.966	N/A
cardiotoxin	1.508	1.897	N/A
DNMT3A	1.508	1.265	N/A
NCOA2	1.51	1.698	N/A
forskolin	1.52	1.891	N/A
carbon tetrachloride	1.541	1.541	N/A
EGLN1	1.546	1.231	N/A
CCND1	1.554	1.066	N/A
dactolisib	1.569	1.992	N/A
VEGFA	1.571	1.374	N/A
S100A4	1.575	2.189	N/A
ERK	1.58	1.431	2.203
TFEB	1.581	1.693	N/A
cobalt chloride	1.598	1.598	N/A
OGA	1.604	1.941	N/A
PDGF BB	1.616	1.616	N/A
HNF1B	1.633	1.89	N/A
PI3K (family)	1.661	1.661	N/A
HDAC2	1.664	1.664	N/A
FLT3LG	1.664	1.664	N/A
salirasib	1.667	1.897	N/A
HIPK2	1.667	1.89	N/A
CIITA	1.67	1.4	N/A
APC	1.673	1.673	N/A
CD40LG	1.694	1.694	N/A
arsenic trioxide	1.698	1.698	N/A
peptidoglycan	1.698	1.698	N/A
ITGAV	1.711	1.481	N/A
F2R	1.715	1.715	N/A
PI3K (complex)	1.726	1.97	N/A
TNFSF12	1.73	2.145	N/A
MECOM	1.732	1.732	N/A
IL33	1.736	1.365	1.067
cigarette smoke	1.741	2.251	N/A
NFKB1	1.752	1.438	N/A
PLAUR	1.756	1.756	N/A
MAPT	1.767	1.987	N/A
lipoteichoic acid	1.792	1.792	N/A
RASSF1	1.8	1.8	N/A
iron	1.802	1.802	N/A
CAMP	1.829	1.829	N/A
ANGPT2	1.849	2.083	N/A
tetradecanoylphorbol acetate	1.857	2.334	1.368
IL2	1.879	1.273	N/A
CD3	1.884	1.393	N/A
SPDEF	1.89	2.121	N/A
IFNGR1	1.89	1.89	N/A
losartan potassium	1.89	1.89	N/A
CDK4/6	1.89	1	N/A
IL27	1.902	1.66	N/A
palmitic acid	1.915	1.601	N/A
heme	1.918	1.918	N/A
FN1	1.921	2.184	N/A
bromobenzene	1.941	1	N/A
SNCA	1.942	1.942	N/A
zymosan	1.951	1.951	N/A
TET3	1.951	N/A	N/A
CSF2	1.952	1.952	N/A
hemozoin	1.953	1.953	N/A
CDK9	1.964	1.964	N/A
TERT	1.964	1.964	N/A
JUNB	1.969	1.969	N/A
BTK	1.977	N/A	N/A
thyroid hormone	1.98	1.98	N/A
lysophosphatidic acid	1.983	1.983	N/A
sirolimus	1.984	1.284	N/A
CEBPD	1.987	1.987	N/A
F2	1.989	1.798	N/A
aldesleukin	2	2	N/A
CYBB	2	2	N/A
MDL 73811	2	2	N/A
CFTR	2	2	N/A
N-acetylmuramyl-L-alanyl-D-isoglutamine	2	2	N/A
TLN1	2	N/A	N/A
CAPN3	2	N/A	N/A
STING1	2	N/A	N/A
Stat3-Stat3	2.003	2.003	1.964
P38 MAPK	2.036	2.552	N/A
TP63	2.066	1.152	N/A
etoposide	2.121	1.633	N/A
miR-1-3p (and other miRNAs w/seed GGAAUGU)	2.123	1.881	N/A
cytokine	2.125	1.915	N/A
CXCL8	2.13	2.13	N/A
PAX3-FOXO1	2.137	2.168	N/A
GW 4064	2.157	1.947	N/A
IL22	2.163	2.163	N/A
SPI1	2.178	2.593	N/A
L-triiodothyronine	2.18	2.007	N/A
chenodeoxycholic acid	2.182	2.182	1.091
PTGES	2.186	2.186	N/A
fatty acid	2.186	1.478	N/A
superoxide	2.19	2.19	N/A
IRF8	2.192	2.192	N/A
KITLG	2.193	1.383	N/A
cinnamaldehyde	2.2	2.2	N/A
TNFRSF1B	2.2	2.2	N/A
EBI3	2.2	1.969	N/A
imiquimod	2.208	2.208	N/A
lovastatin	2.213	1.98	N/A
platelet activating factor	2.217	2.217	N/A
ALDH1A2	2.219	2.219	N/A
thapsigargin	2.224	1.885	N/A
miR-338-3p (miRNAs w/seed CCAGCAU)	2.236	2.449	N/A
miR-335-3p (miRNAs w/seed UUUUCAU)	2.236	2.449	N/A
lisinopril	2.236	2.236	N/A
trovafloxacin	2.236	2	N/A
TLR2	2.244	2.606	N/A
tretinoin	2.274	1.735	0.427
CSF3	2.295	2.114	2.234
IL9	2.333	2.828	N/A
estrogen receptor	2.333	2.333	N/A
bisphenol A	2.345	2.345	N/A
CR1L	2.345	2.345	N/A
GATA2	2.345	2.138	N/A
TNF	2.349	2.776	1.391
TGM2	2.354	2.354	1.067
indomethacin	2.358	2.358	1.982
IL18	2.361	2.361	N/A
PPARGC1A	2.366	2.2	N/A
IL1	2.38	2.75	N/A
1-methyl-4-phenyl-1,2,3,6-tetrahydropyridine	2.383	2.383	N/A
E. coli B4 lipopolysaccharide	2.394	1.631	N/A
Ifn gamma	2.403	2.403	N/A
OSM	2.409	2.081	N/A
CEBPE	2.42	2.207	N/A
HDAC1	2.433	2.433	N/A
IL6	2.443	2.462	1.766
C5	2.449	2.449	1.966
Srgn	2.449	2.236	N/A
miR-30c-5p (and other miRNAs w/seed GUAAACA)	2.518	2.697	N/A
EGR1	2.555	2.555	N/A
miR-29b-3p (and other miRNAs w/seed AGCACCA)	2.56	2.748	N/A
Pam3-Cys-Ser-Lys4	2.58	2.378	N/A
PRKCA	2.588	2.588	N/A
poly rI:rC-RNA	2.604	2.558	N/A
SB-431542	2.613	2.763	N/A
NFkB (complex)	2.631	2.464	N/A
LARP1	2.646	N/A	N/A
IL17A	2.655	2.927	N/A
FAS	2.676	2.676	N/A
IFNG	2.74	3.136	2.348
EIF4E	2.967	2.646	N/A
lipopolysaccharide	3.021	3.188	2.672
FKBP10	3.051	3.051	N/A
MAPK14	3.063	2.914	N/A
APP	3.3	3.389	N/A
RELA	3.519	3.519	N/A
NCOA4	N/A	-1.98	N/A
lysophosphatidylcholine	N/A	1.961	N/A
SMARCB1	N/A	-1.89	N/A
KDM5B	N/A	1.633	N/A
RORC	N/A	1.432	N/A
MYO1B	N/A	-1.362	N/A
advanced glycation end-products	N/A	1.109	N/A
ESRRG	N/A	-1.103	N/A
adenosine	N/A	1.067	N/A
PBX1	N/A	1.067	N/A
carbamazepine	N/A	-1	N/A
IL20	N/A	1	N/A
KMT2D	N/A	-0.97	N/A
IL7	N/A	0.928	N/A
TSH	N/A	0.831	N/A
MAPK3	N/A	0.686	N/A
CD28	N/A	0.632	N/A
cadmium chloride	N/A	-0.492	N/A
POMC	N/A	-0.392	N/A
POU2AF1	N/A	0.339	N/A
SCD	N/A	-0.333	N/A
KLF5	N/A	0.305	N/A
MET	N/A	-0.243	N/A
sphingosine-1-phosphate	N/A	-0.145	N/A
NR1I2	N/A	-0.128	N/A
let-7	N/A	-0.049	N/A
1-methyl-2-pyrrolidinone	N/A	N/A	N/A
CD2	N/A	N/A	N/A
ITGA6	N/A	N/A	N/A
K-252	N/A	N/A	N/A
FANCD2	N/A	N/A	N/A
daporinad	N/A	N/A	N/A
Lycium barbarum polysaccharides	N/A	N/A	N/A
PPP3CA	N/A	N/A	N/A
CH-223191	N/A	N/A	N/A
EXOC3L1	N/A	N/A	N/A
DRP2	N/A	N/A	N/A
RMRP	N/A	N/A	N/A
ETV1	N/A	N/A	N/A
CSK	N/A	N/A	N/A
SLC30A7	N/A	N/A	N/A
BCAT1	N/A	N/A	N/A
origanum majorana extract	N/A	N/A	N/A
12-hydroxyeicosatetraenoic acid	N/A	N/A	N/A
SUZ12	N/A	N/A	N/A
SF1	N/A	N/A	N/A
GATA5	N/A	N/A	N/A
CAMK2G	N/A	N/A	N/A
CASP3	N/A	N/A	N/A
potassium nitrate	N/A	N/A	N/A
GLUD1	N/A	N/A	N/A
8-bromo-cyclic ADP-ribose	N/A	N/A	N/A
PLP2	N/A	N/A	N/A
SLC12A6	N/A	N/A	N/A
SOX6	N/A	N/A	N/A
N-ethyl-N-nitrosourea	N/A	N/A	N/A
BMPER	N/A	N/A	N/A
chrysin	N/A	N/A	N/A
FKHR	N/A	N/A	N/A
HSPB1	N/A	N/A	N/A
resolvin D5	N/A	N/A	N/A
MIRLET7	N/A	N/A	N/A
lithocholic acid	N/A	N/A	N/A
MVP	N/A	N/A	N/A
Gata	N/A	N/A	N/A
finerenone	N/A	N/A	N/A
SLC2A1	N/A	N/A	N/A
SP7	N/A	N/A	N/A
PCDH17	N/A	N/A	N/A
flunisolide	N/A	N/A	N/A
TNIP1	N/A	N/A	N/A
amlodipine	N/A	N/A	N/A
vistusertib	N/A	N/A	N/A
SF-3-030	N/A	N/A	N/A
S-equol	N/A	N/A	N/A
SSPN	N/A	N/A	N/A
ezetimibe	N/A	N/A	N/A
2-deoxyglucose	N/A	N/A	N/A
RGS20	N/A	N/A	N/A
black raspberry extract	N/A	N/A	N/A
8-aminoadenosine	N/A	N/A	N/A
Fibrin	N/A	N/A	N/A
pantoprazole	N/A	N/A	N/A
Pde4	N/A	N/A	N/A
CXCL3	N/A	N/A	N/A
Rp-8-Br-cGMPS	N/A	N/A	N/A
CBFA2T3	N/A	N/A	N/A
FGF3	N/A	N/A	N/A
1-((2-chlorophenyl)diphenylmethyl)-1H-pyrazole	N/A	N/A	N/A
NSOP00313	N/A	N/A	N/A
ATF6	N/A	N/A	N/A
15-deoxy-delta-12-14 prostaglandin D2	N/A	N/A	N/A
CFP	N/A	N/A	N/A
anti-ebv-miR-BART7-3p inhibitor	N/A	N/A	N/A
Complement	N/A	N/A	N/A
KCNK9	N/A	N/A	N/A
arginine butyrate	N/A	N/A	N/A
ulixertinib	N/A	N/A	N/A
CDK5	N/A	N/A	N/A
SNAP91	N/A	N/A	N/A
caffeic acid	N/A	N/A	N/A
N(2)-(gamma-D-glutamyl)-meso-2,2'-diaminopimelic acid	N/A	N/A	N/A
miR-450a-5p (and other miRNAs w/seed UUUGCGA)	N/A	N/A	N/A
cilostazol	N/A	N/A	N/A
NFYC	N/A	N/A	N/A
MYL2	N/A	N/A	N/A
dehydroxymethylepoxyquinomicin	N/A	N/A	N/A
fluoroquinolone	N/A	N/A	N/A
FDX2	N/A	N/A	N/A
4-aminopyrazolo(3,4-d)pyrimidine	N/A	N/A	N/A
HSD11B1	N/A	N/A	N/A
CD163	N/A	N/A	N/A
acrolein	N/A	N/A	N/A
Calcineurin A	N/A	N/A	N/A
BML-111	N/A	N/A	N/A
miR-489-3p (miRNAs w/seed UGACAUC)	N/A	N/A	N/A
POR	N/A	N/A	N/A
SRT3025	N/A	N/A	N/A
oleanolic acid	N/A	N/A	N/A
aurothioglucose	N/A	N/A	N/A
phorone	N/A	N/A	N/A
TCF25	N/A	N/A	N/A
NPR1	N/A	N/A	N/A
SUCO	N/A	N/A	N/A
ATP13A2	N/A	N/A	N/A
Hbb	N/A	N/A	N/A
ZFPM1	N/A	N/A	N/A
Mi2	N/A	N/A	N/A
morphiceptin	N/A	N/A	N/A
nabumetone	N/A	N/A	N/A
norisoboldine	N/A	N/A	N/A
CHL1	N/A	N/A	N/A
LUCAT1	N/A	N/A	N/A
MOG	N/A	N/A	N/A
KIT	N/A	N/A	N/A
protocatechuic acid	N/A	N/A	N/A
ZNF202	N/A	N/A	N/A
HOXC9	N/A	N/A	N/A
Mmp	N/A	N/A	N/A
mini-GAGR	N/A	N/A	N/A
voltage-gated calcium channel	N/A	N/A	N/A
VIPAS39	N/A	N/A	N/A
HBB	N/A	N/A	N/A
mir-551	N/A	N/A	N/A
FCGR1A	N/A	N/A	N/A
Ho	N/A	N/A	N/A
CLEC10A	N/A	N/A	N/A
4-cresol	N/A	N/A	N/A
benzoic acid	N/A	N/A	N/A
FTO	N/A	N/A	N/A
EEF1D	N/A	N/A	N/A
EPM2A	N/A	N/A	N/A
SDC3	N/A	N/A	N/A
PIAS3	N/A	N/A	N/A
benzo(a)pyrene-3,6-quinone	N/A	N/A	N/A
BAPTA	N/A	N/A	N/A
MUC4	N/A	N/A	N/A
BMP1	N/A	N/A	N/A
TRPC6	N/A	N/A	N/A
EHD4	N/A	N/A	N/A
mercuric chloride	N/A	N/A	N/A
ropivacaine	N/A	N/A	N/A
SSBP3	N/A	N/A	N/A
arsenic	N/A	N/A	N/A
LINC01006	N/A	N/A	N/A
PAK1	N/A	N/A	N/A
LGR6	N/A	N/A	N/A
HMGN1	N/A	N/A	N/A
DEETGE-CAL-Tat	N/A	N/A	N/A
2-chloro-N(6)cyclopentyladenosine	N/A	N/A	N/A
miR-744-5p (and other miRNAs w/seed GCGGGGC)	N/A	N/A	N/A
cation	N/A	N/A	N/A
CBP-ICSBP-IRF-1-PU.1	N/A	N/A	N/A
BET	N/A	N/A	N/A
TNFSF15	N/A	N/A	N/A
NUBP1	N/A	N/A	N/A
Ras homolog	N/A	N/A	N/A
dobutamine	N/A	N/A	N/A
pentanoic acid	N/A	N/A	N/A
PARPBP	N/A	N/A	N/A
LINC00242	N/A	N/A	N/A
LRP1B	N/A	N/A	N/A
CTNNAL1	N/A	N/A	N/A
PTPRCAP	N/A	N/A	N/A
TINCR	N/A	N/A	N/A
DNTTIP1	N/A	N/A	N/A
BCAN	N/A	N/A	N/A
ticagrelor	N/A	N/A	N/A
1-deoxysphinganine	N/A	N/A	N/A
vinblastine	N/A	N/A	N/A
ATP6V1B1	N/A	N/A	N/A
betamethasone	N/A	N/A	N/A
NOS3	N/A	N/A	N/A
PGF	N/A	N/A	N/A
CHD1	N/A	N/A	N/A
1-palmitoyl-2-(5-oxovaleroyl)-sn-glycero-3-phosphorylcholine	N/A	N/A	N/A
parthenolide	N/A	N/A	N/A
Laminin1	N/A	N/A	N/A
3-aminotriazole	N/A	N/A	N/A
trimetazidine	N/A	N/A	N/A
alpha-hederin	N/A	N/A	N/A
ODN-BW006	N/A	N/A	N/A
LINC01139	N/A	N/A	N/A
WNT3	N/A	N/A	N/A
FTMT	N/A	N/A	N/A
serpin peptide 16	N/A	N/A	N/A
ARHGDIG	N/A	N/A	N/A
CDON	N/A	N/A	N/A
14,15-epoxyeicosatrienoic acid	N/A	N/A	N/A
sulfasalazine	N/A	N/A	N/A
ACS84	N/A	N/A	N/A
HTATIP2	N/A	N/A	N/A
HPGDS	N/A	N/A	N/A
AURKB	N/A	N/A	N/A
roflumilast N-oxide	N/A	N/A	N/A
nitroglycerin	N/A	N/A	N/A
NLK	N/A	N/A	N/A
PCI-34051	N/A	N/A	N/A
nucleoside	N/A	N/A	N/A
HDAC5	N/A	N/A	N/A
NUMBL	N/A	N/A	N/A
2-mercaptoethanol	N/A	N/A	N/A
GLIS1	N/A	N/A	N/A
Irp	N/A	N/A	N/A
TAOK2	N/A	N/A	N/A
mir-196	N/A	N/A	N/A
CDC42BPB	N/A	N/A	N/A
VE-821	N/A	N/A	N/A
Z-551	N/A	N/A	N/A
emodin	N/A	N/A	N/A
ursolic acid	N/A	N/A	N/A
sesaminol	N/A	N/A	N/A
ADM	N/A	N/A	N/A
(-)-isoproterenol	N/A	N/A	N/A
kahweol	N/A	N/A	N/A
2-hydroxy-imino phenylpyruvic acid	N/A	N/A	N/A
setanaxib	N/A	N/A	N/A
MBP	N/A	N/A	N/A
N-cor	N/A	N/A	N/A
hemoglobin	N/A	N/A	N/A
HNRNPA1	N/A	N/A	N/A
PD 123319	N/A	N/A	N/A
NTRK1	N/A	N/A	N/A
ATP2B4	N/A	N/A	N/A
palmitoleic acid	N/A	N/A	N/A
RPRD1A	N/A	N/A	N/A
SP100	N/A	N/A	N/A
FBN2	N/A	N/A	N/A
H. carbonum toxin	N/A	N/A	N/A
Laminin5	N/A	N/A	N/A
CACYBP	N/A	N/A	N/A
SCAI	N/A	N/A	N/A
CaCCinh-A01	N/A	N/A	N/A
Rab11	N/A	N/A	N/A
PPP2R5A	N/A	N/A	N/A
zileuton	N/A	N/A	N/A
Ren2	N/A	N/A	N/A
CP-724,714	N/A	N/A	N/A
SWAP70	N/A	N/A	N/A
HNRNPU	N/A	N/A	N/A
IL1R2	N/A	N/A	N/A
TEX10	N/A	N/A	N/A
CV 3988	N/A	N/A	N/A
deoxycorticosterone acetate/potassium chloride/sodium chloride	N/A	N/A	N/A
FUT8	N/A	N/A	N/A
FBXL17	N/A	N/A	N/A
ebselen	N/A	N/A	N/A
1,5-bis-(dihexyl-N-nitrosoamino)-2,4-dinitrobenzene	N/A	N/A	N/A
ferulic acid	N/A	N/A	N/A
SRGAP1	N/A	N/A	N/A
ACADS	N/A	N/A	N/A
ABCA4	N/A	N/A	N/A
RETN	N/A	N/A	N/A
nystatin	N/A	N/A	N/A
WWOX	N/A	N/A	N/A
SCGB1A1	N/A	N/A	N/A
EML4-ALK	N/A	0	N/A
EIF2S1	N/A	N/A	N/A
10-nitrooleate	N/A	N/A	N/A
ETS	N/A	N/A	N/A
acetic acid	N/A	N/A	N/A
IFI30	N/A	N/A	N/A
GSE1	N/A	N/A	N/A
nitrosonifedipine	N/A	N/A	N/A
4-hydroxyphenylmethylene hydantoin	N/A	N/A	N/A
aristolochic acid I	N/A	N/A	N/A
GSKIP	N/A	N/A	N/A
donepezil	N/A	N/A	N/A
perindoprilat	N/A	N/A	N/A
MEL S3	N/A	N/A	N/A
oridonin	N/A	N/A	N/A
H1-2	N/A	N/A	N/A
selaginella tamariscina extract	N/A	N/A	N/A
ADORA2B	N/A	N/A	N/A
Pln	N/A	N/A	N/A
ZNF322	N/A	N/A	N/A
1,2,3,6,7,8-hexachlorodibenzodioxin	N/A	N/A	N/A
BTBD7	N/A	N/A	N/A
HSPB3	N/A	N/A	N/A
17-phenyl-18,19,20-trinor-prostaglandin d2	N/A	N/A	N/A
LONP1	N/A	N/A	N/A
isoliquiritigenin	N/A	N/A	N/A
ZBTB18	N/A	N/A	N/A
DIM-C-pPhOH-3-Cl-5-OCH3	N/A	N/A	N/A
ALDH2	N/A	N/A	N/A
TNFRSF9	N/A	N/A	N/A
tempo	N/A	N/A	N/A
pictilisib	N/A	N/A	N/A
RUNX3	N/A	N/A	N/A
tetrodotoxin	N/A	N/A	N/A
Ferritin	N/A	N/A	N/A
N4BP1	N/A	N/A	N/A
compound 48/80	N/A	N/A	N/A
GTx-560	N/A	N/A	N/A
miR-221-3p (and other miRNAs w/seed GCUACAU)	N/A	N/A	N/A
glucose oxidase	N/A	N/A	N/A
AK1	N/A	N/A	N/A
DLX3	N/A	N/A	N/A
RPL13A	N/A	N/A	N/A
C5	N/A	N/A	N/A
IOX2	N/A	N/A	N/A
NCD-38	N/A	N/A	N/A
direct black 38	N/A	N/A	N/A
oxysterol	N/A	N/A	N/A
THBD	N/A	N/A	N/A
malolactomycin D	N/A	N/A	N/A
G6PD	N/A	N/A	N/A
PAX2	N/A	N/A	N/A
AZD1981	N/A	N/A	N/A
mir-126	N/A	N/A	N/A
LPL	N/A	N/A	N/A
V-PYRRO/NO	N/A	N/A	N/A
ribose	N/A	N/A	N/A
NOG	N/A	N/A	N/A
CDH11	N/A	N/A	N/A
interferon beta-1a	N/A	N/A	N/A
CSNK2A2	N/A	N/A	N/A
GSN	N/A	N/A	N/A
SRFBP1	N/A	N/A	N/A
voxtalisib	N/A	N/A	N/A
22-hydroxycholesterol	N/A	N/A	N/A
IGF receptor	N/A	N/A	N/A
DDB2	N/A	N/A	N/A
FOXJ2	N/A	N/A	N/A
grape seed extract	N/A	N/A	N/A
norcantharidin	N/A	N/A	N/A
PDE6B	N/A	N/A	N/A
PRDM4	N/A	N/A	N/A
lipid A	N/A	N/A	N/A
PBX2	N/A	N/A	N/A
SETD2	N/A	N/A	N/A
CNGA3	N/A	N/A	N/A
CCN4	N/A	N/A	N/A
PPP1R13L	N/A	N/A	N/A
erastin	N/A	N/A	N/A
ISCU	N/A	N/A	N/A
PD 145065	N/A	N/A	N/A
4-ethylsulfanylphenylmethylene hydantoin	N/A	N/A	N/A
ZNF219	N/A	N/A	N/A
noscapine	N/A	N/A	N/A
phenyl butyrate	N/A	N/A	N/A
mir-221	N/A	N/A	N/A
GSK2816126	N/A	N/A	N/A
lestaurtinib	N/A	N/A	N/A
MLIP	N/A	N/A	N/A
KRT3	N/A	N/A	N/A
LMNA	N/A	N/A	N/A
GTPL714	N/A	N/A	N/A
OSCAR	N/A	N/A	N/A
MAP3K5	N/A	N/A	N/A
IBSP	N/A	N/A	N/A
salinosporamide A	N/A	N/A	N/A
ferric citrate	N/A	N/A	N/A
MMP408	N/A	N/A	N/A
theophylline	N/A	N/A	N/A
Ap1	N/A	N/A	N/A
mir-1180	N/A	N/A	N/A
AP1M1	N/A	N/A	N/A
IFN type 1	N/A	N/A	N/A
VEGFB	N/A	N/A	N/A
maraviroc	N/A	N/A	N/A
bepridil	N/A	N/A	N/A
RPN2	N/A	N/A	N/A
LRP1	N/A	N/A	N/A
FGFR3	N/A	N/A	N/A
PTCSC3	N/A	N/A	N/A
TAPBP	N/A	N/A	N/A
PKNOX1	N/A	N/A	N/A
ATP1B3	N/A	N/A	N/A
RAPGEF4	N/A	N/A	N/A
FABP1	N/A	N/A	N/A
HDAC6	N/A	N/A	N/A
1H,1H,2H,2H-perfluorodecanol	N/A	N/A	N/A
DPAGT1	N/A	N/A	N/A
CELA1	N/A	N/A	N/A
ZRL5P4	N/A	N/A	N/A
ADCY	N/A	N/A	N/A
RO4929097	N/A	N/A	N/A
CTF1	N/A	N/A	N/A
SC-19220	N/A	N/A	N/A
LINC00672	N/A	N/A	N/A
PLEKHA2	N/A	N/A	N/A
Raet1d/Raet1e	N/A	N/A	N/A
atypical protein kinase C	N/A	N/A	N/A
EIF2B5	N/A	N/A	N/A
PTP4A3	N/A	N/A	N/A
MAP2K2	N/A	N/A	N/A
P2RX4	N/A	N/A	N/A
2-mercaptoacetate	N/A	N/A	N/A
manganese	N/A	N/A	N/A
L-histidine	N/A	N/A	N/A
FZD8	N/A	N/A	N/A
RNF40	N/A	N/A	N/A
apicidin	N/A	N/A	N/A
SMO	N/A	N/A	N/A
LMF1	N/A	N/A	N/A
JUND	N/A	N/A	N/A
HNRNPL	N/A	N/A	N/A
ITGB6	N/A	N/A	N/A
FOXD2-AS1	N/A	N/A	N/A
FOXP3	N/A	N/A	N/A
RXRB	N/A	N/A	N/A
RHOJ	N/A	N/A	N/A
candesartan	N/A	N/A	N/A
WNT5B	N/A	N/A	N/A
NAGLU	N/A	N/A	N/A
FYB1	N/A	N/A	N/A
pentazocine	N/A	N/A	N/A
KLK1	N/A	N/A	N/A
SIRT6	N/A	N/A	N/A
STOX1	N/A	N/A	N/A
EGLN3	N/A	N/A	N/A
FOLR1	N/A	N/A	N/A
ITGA4	N/A	N/A	N/A
hypochlorous acid	N/A	N/A	N/A
EHHADH	N/A	N/A	N/A
KCNK2	N/A	N/A	N/A
zinc sulfate	N/A	N/A	N/A
avobenzone	N/A	N/A	N/A
thiazolidinedione	N/A	N/A	N/A
ENG	N/A	N/A	N/A
Til1	N/A	N/A	N/A
KRT5	N/A	N/A	N/A
TXNRD1	N/A	N/A	N/A
APBA3	N/A	N/A	N/A
ferricyanide	N/A	N/A	N/A
tanshinone II	N/A	N/A	N/A
PSMA1	N/A	N/A	N/A
glyphosate	N/A	N/A	N/A
ATP6V0C	N/A	N/A	N/A
PMM2	N/A	N/A	N/A
pitavastatin	N/A	N/A	N/A
LOC101929295	N/A	N/A	N/A
miR-706 (miRNAs w/seed GAGAAAC)	N/A	N/A	N/A
ambroxol	N/A	N/A	N/A
ACVR1	N/A	N/A	N/A
clodronic acid	N/A	N/A	N/A
UC2288	N/A	N/A	N/A
NUDT21	N/A	N/A	N/A
ITGA1	N/A	N/A	N/A
DRAP1	N/A	N/A	N/A
pentosan polysulfate	N/A	N/A	N/A
CSF2RA	N/A	N/A	N/A
zalcitabine	N/A	N/A	N/A
L-685,458	N/A	N/A	N/A
ANO1	N/A	N/A	N/A
PDGF (family)	N/A	N/A	N/A
CHRNA7	N/A	N/A	N/A
LINC01564	N/A	N/A	N/A
ARL6IP5	N/A	N/A	N/A
MGAT1	N/A	N/A	N/A
4-hydroxyestradiol-17beta	N/A	N/A	N/A
PLA2G2D	N/A	N/A	N/A
YWHAZ	N/A	N/A	N/A
EPOR	N/A	N/A	N/A
MOAP1	N/A	N/A	N/A
RBM5	N/A	N/A	N/A
CD99	N/A	N/A	N/A
miR-199a-3p (and other miRNAs w/seed CAGUAGU)	N/A	N/A	N/A
zopolrestat	N/A	N/A	N/A
IRS1	N/A	N/A	N/A
NFATC4	N/A	N/A	N/A
THSD4	N/A	N/A	N/A
ellagic acid	N/A	N/A	N/A
P2RY2	N/A	N/A	N/A
LFM-A13	N/A	N/A	N/A
raffinose	N/A	N/A	N/A
SMCR8	N/A	N/A	N/A
EVP 4593	N/A	N/A	N/A
HNF1A-AS1	N/A	N/A	N/A
glycine	N/A	N/A	N/A
EIF2AK4	N/A	N/A	N/A
GNA15	N/A	N/A	N/A
Ap1 gamma	N/A	N/A	N/A
2,2',4,4',5,5'-hexabromodiphenyl ether	N/A	N/A	N/A
FTH1	N/A	N/A	N/A
procaterol	N/A	N/A	N/A
COL6A1	N/A	N/A	N/A
HRG	N/A	N/A	N/A
durapatite	N/A	N/A	N/A
mir-145	N/A	N/A	N/A
cilostamide	N/A	N/A	N/A
MIR124	N/A	N/A	N/A
RNF17	N/A	N/A	N/A
ROR1	N/A	N/A	N/A
ABCC1	N/A	N/A	N/A
bardoxolone	N/A	N/A	N/A
Sos	N/A	N/A	N/A
GPR4	N/A	N/A	N/A
mir-23	N/A	N/A	N/A
miR-218-5p (and other miRNAs w/seed UGUGCUU)	N/A	N/A	N/A
BID	N/A	N/A	N/A
tyrphostin AG 1296	N/A	N/A	N/A
UQCC3	N/A	N/A	N/A
RV 538	N/A	N/A	N/A
MAFK	N/A	N/A	N/A
Adaptor protein 2	N/A	N/A	N/A
physostigmine	N/A	N/A	N/A
GSK2837808A	N/A	N/A	N/A
C20-D3-vitamin A	N/A	N/A	N/A
Mapk	N/A	N/A	N/A
TSIX	N/A	N/A	N/A
SYNJ1	N/A	N/A	N/A
repertaxin	N/A	N/A	N/A
fluvastatin	N/A	N/A	N/A
KLK5	N/A	N/A	N/A
LGH447	N/A	N/A	N/A
AI-1	N/A	N/A	N/A
3,5-diiodothyronine	N/A	N/A	N/A
SNAP23	N/A	N/A	N/A
parbendazole	N/A	N/A	N/A
reactive oxygen species	N/A	N/A	N/A
glucagon	N/A	N/A	N/A
histidyl-proline diketopiperazine	N/A	N/A	N/A
SOD2	N/A	N/A	N/A
globotriaosylceramide	N/A	N/A	N/A
SRT2104	N/A	N/A	N/A
GAB2	N/A	N/A	N/A
IGFBP1	N/A	N/A	N/A
naringin	N/A	N/A	N/A
ITGAL	N/A	N/A	N/A
HSP-990	N/A	N/A	N/A
HOXA9	N/A	N/A	N/A
MFGE8	N/A	N/A	N/A
tributyltin	N/A	N/A	N/A
isocitric acid	N/A	N/A	N/A
chondroitin sulfate A	N/A	N/A	N/A
HOXD13	N/A	N/A	N/A
gemcitabine	N/A	N/A	N/A
3,4-dihydroxyphenylethanol	N/A	N/A	N/A
SORT1	N/A	N/A	N/A
PRR11	N/A	N/A	N/A
15-epi-lipoxin A4	N/A	N/A	N/A
benfotiamine	N/A	N/A	N/A
coal tar	N/A	N/A	N/A
miR-100-5p (and other miRNAs w/seed ACCCGUA)	N/A	N/A	N/A
TRPM2	N/A	N/A	N/A
LEPR	N/A	0	N/A
TRAM2	N/A	N/A	N/A
Miat	N/A	N/A	N/A
nickel	N/A	N/A	N/A
costunolide	N/A	N/A	N/A
NuRD	N/A	N/A	N/A
vitamin K2	N/A	N/A	N/A
sodium selenite	N/A	N/A	N/A
TAT	N/A	N/A	N/A
KN-62	N/A	N/A	N/A
COMMD1	N/A	N/A	N/A
CA074-methyl ester	N/A	N/A	N/A
PON1	N/A	N/A	N/A
UPP1	N/A	N/A	N/A
miR-30a-3p (and other miRNAs w/seed UUUCAGU)	N/A	N/A	N/A
N-(3-(aminomethyl)benzyl)acetamidine	N/A	N/A	N/A
CCL1	N/A	N/A	N/A
singlet oxygen	N/A	N/A	N/A
nordihydrocapsiate	N/A	N/A	N/A
benzyl isothiocyanate	N/A	N/A	N/A
TFF3	N/A	N/A	N/A
mir-675	N/A	N/A	N/A
MI-503	N/A	N/A	N/A
platelet activating factor-C16	N/A	N/A	N/A
4-nitrobenzoic acid	N/A	N/A	N/A
3,4-dihydroxybenzaldehyde	N/A	N/A	N/A
PRSS8	N/A	N/A	N/A
sargramostim	N/A	N/A	N/A
tianeptine	N/A	N/A	N/A
CDC42	N/A	N/A	N/A
HNRNPA2B1	N/A	N/A	N/A
APC2	N/A	N/A	N/A
beta-glycerophosphoric acid	N/A	N/A	N/A
diphtheria toxin	N/A	N/A	N/A
L2HGDH	N/A	N/A	N/A
mocetinostat	N/A	N/A	N/A
GPD1L	N/A	N/A	N/A
tomelukast	N/A	N/A	N/A
FHL2	N/A	N/A	N/A
CAMK2D	N/A	N/A	N/A
GABPB1	N/A	N/A	N/A
DAG1	N/A	N/A	N/A
SCIN	N/A	N/A	N/A
telaglenastat	N/A	N/A	N/A
typhoid vaccine Ty21a	N/A	N/A	N/A
4-nitroquinoline-1-oxide	N/A	N/A	N/A
PTPN6	N/A	N/A	N/A
IGFBP7	N/A	N/A	N/A
2,3-bis(3'-hydroxybenzyl)butane-1,4-diol	N/A	N/A	N/A
bafilomycin A1	N/A	N/A	N/A
Collagen type IV	N/A	N/A	N/A
L 655238	N/A	N/A	N/A
GPC2	N/A	N/A	N/A
concanamycin A	N/A	N/A	N/A
NTF4	N/A	N/A	N/A
PMP22	N/A	N/A	N/A
GFRA1	N/A	N/A	N/A
ASPN	N/A	N/A	N/A
ZC3H13	N/A	N/A	N/A
PLEKHA1	N/A	N/A	N/A
CASZ1	N/A	N/A	N/A
NEDD4	N/A	N/A	N/A
enterolactone	N/A	N/A	N/A
PRDM16	N/A	N/A	N/A
ozone	N/A	N/A	N/A
RGS10	N/A	N/A	N/A
astragalin	N/A	N/A	N/A
RFX1	N/A	N/A	N/A
vitamin E	N/A	N/A	N/A
IDH1	N/A	N/A	N/A
ANKH	N/A	N/A	N/A
4-methylnitrosoamino-1-(3-pyridinyl)-1-butanone	N/A	N/A	N/A
Phe-Pro-Arg-chloromethyl ketone	N/A	N/A	N/A
Raet1b	N/A	N/A	N/A
EDNRA	N/A	N/A	N/A
EPIST variant 2	N/A	N/A	N/A
UTRN	N/A	N/A	N/A
LIPA	N/A	N/A	N/A
naringenin	N/A	N/A	N/A
alpha-ketobutyric acid	N/A	N/A	N/A
PTIO	N/A	N/A	N/A
4-O-carboxymethylascochlorin	N/A	N/A	N/A
BARX2	N/A	N/A	N/A
aloxistatin	N/A	N/A	N/A
nexinhib4	N/A	N/A	N/A
Arg-Gly-Asp	N/A	N/A	N/A
FBXL5	N/A	N/A	N/A
polyhydroxyethyl methacrylate	N/A	N/A	N/A
HOXB5	N/A	N/A	N/A
BCL3	N/A	N/A	N/A
SOST	N/A	N/A	N/A
spermine	N/A	N/A	N/A
leukotriene B4	N/A	N/A	N/A
mannose	N/A	N/A	N/A
PLA2G4A	N/A	N/A	N/A
FZD4	N/A	N/A	N/A
5-hydroxytryptamine	N/A	N/A	N/A
BIRC5	N/A	N/A	N/A
hyodeoxycholic acid	N/A	N/A	N/A
poly-L-lysine	N/A	N/A	N/A
TUBB1	N/A	N/A	N/A
vinorelbine	N/A	N/A	N/A
lysophosphatidylinositol	N/A	N/A	N/A
Mn2+	N/A	N/A	N/A
COLGALT1	N/A	N/A	N/A
C9	N/A	N/A	N/A
acetyl-11-keto-beta-boswellic acid	N/A	N/A	N/A
MIA	N/A	N/A	N/A
LINC00665	N/A	N/A	N/A
HDAC3	N/A	N/A	N/A
SNRPB	N/A	N/A	N/A
miR-208a-3p (and other miRNAs w/seed UAAGACG)	N/A	N/A	N/A
phytic acid	N/A	N/A	N/A
fisetin	N/A	N/A	N/A
WDR5	N/A	N/A	N/A
Cyp2c23	N/A	N/A	N/A
SH3BP2	N/A	N/A	N/A
7-nitroindazole	N/A	N/A	N/A
MUC20-OT1	N/A	N/A	N/A
Fibrinogen	N/A	N/A	N/A
temozolomide	N/A	N/A	N/A
SLC9A9	N/A	N/A	N/A
ITGA9	N/A	N/A	N/A
CYP2C9	N/A	N/A	N/A
2'-fucosyllactose	N/A	N/A	N/A
BIX 01294	N/A	N/A	N/A
HMGXB4	N/A	N/A	N/A
NOLC1	N/A	N/A	N/A
Focal adhesion kinase	N/A	N/A	N/A
methoxychlor	N/A	N/A	N/A
Mir200	N/A	N/A	N/A
spermine nitric oxide complex	N/A	N/A	N/A
MGAT5	N/A	N/A	N/A
GW 9508	N/A	N/A	N/A
ELF4	N/A	N/A	N/A
ephedrine	N/A	N/A	N/A
CDH2	N/A	N/A	N/A
DPP10-AS1	N/A	N/A	N/A
FZD6	N/A	N/A	N/A
sodium iodide	N/A	N/A	N/A
TRIB3	N/A	N/A	N/A
MHC II	N/A	N/A	N/A
chelerythrine	N/A	N/A	N/A
KCNJ10	N/A	N/A	N/A
ruxolitinib	N/A	N/A	N/A
MLN120B	N/A	N/A	N/A
N4BP2L2	N/A	N/A	N/A
N-methylsulfonyl-12,12-dibromododec-11-enamide	N/A	N/A	N/A
LATS1	N/A	N/A	N/A
UTP	N/A	N/A	N/A
T-type Calcium Channel	N/A	N/A	N/A
PF543	N/A	N/A	N/A
CFB	N/A	N/A	N/A
batimastat	N/A	N/A	N/A
quizartinib	N/A	N/A	N/A
succinylacetone	N/A	N/A	N/A
tyrphostin B56	N/A	N/A	N/A
UBD	N/A	N/A	N/A
rebamipide	N/A	N/A	N/A
S-nitrosoglutathione	N/A	N/A	N/A
nitroarginine	N/A	N/A	N/A
dipyridamole	N/A	N/A	N/A
MSR1	N/A	N/A	N/A
VTN	N/A	N/A	N/A
probucol	N/A	N/A	N/A
EDN3	N/A	N/A	N/A
SLC25A13	N/A	N/A	N/A
S-nitroso-N-acetyl-DL-penicillamine	N/A	N/A	N/A
AURKA	N/A	N/A	N/A
stattic	N/A	N/A	N/A
RDH16	N/A	N/A	N/A
nitrite	N/A	N/A	N/A
MARK4	N/A	N/A	N/A
MFAP2	N/A	N/A	N/A
N-chlorotaurine	N/A	N/A	N/A
TRD	N/A	N/A	N/A
BTC	N/A	N/A	N/A
KCNN4	N/A	N/A	N/A
BTG2	N/A	N/A	N/A
natamycin	N/A	N/A	N/A
ITGA5	N/A	N/A	N/A
BANF1	N/A	N/A	N/A
FSHB	N/A	N/A	N/A
COL4A3	N/A	N/A	N/A
WAC	N/A	N/A	N/A
NFE2	N/A	N/A	N/A
miR-204-5p (and other miRNAs w/seed UCCCUUU)	N/A	N/A	N/A
TAF4	N/A	N/A	N/A
EEF1A2	N/A	N/A	N/A
TNFRSF10A	N/A	N/A	N/A
XDH	N/A	N/A	N/A
mir-144	N/A	N/A	N/A
ICMT	N/A	N/A	N/A
polyunsaturated fatty acids	N/A	N/A	N/A
CSDE1	N/A	N/A	N/A
SAFB	N/A	N/A	N/A
amsacrine	N/A	N/A	N/A
Fcor	N/A	N/A	N/A
CTSB	N/A	N/A	N/A
Alocasia cucullata root extract	N/A	N/A	N/A
resolvin D2	N/A	N/A	N/A
tiron	N/A	N/A	N/A
CREB3L1	N/A	N/A	N/A
mibefradil	N/A	N/A	N/A
adenine	N/A	N/A	N/A
DYSF	N/A	N/A	N/A
NLRP2	N/A	N/A	N/A
ACTN4	N/A	N/A	N/A
HOXB4	N/A	N/A	N/A
ILF2	N/A	N/A	N/A
lactosylceramide	N/A	N/A	N/A
DNAJA4	N/A	N/A	N/A
carbon	N/A	N/A	N/A
CD47	N/A	N/A	N/A
PRNCR1	N/A	N/A	N/A
BMPR1A	N/A	N/A	N/A
THBS2	N/A	N/A	N/A
ethyl gallate	N/A	N/A	N/A
RFXANK	N/A	N/A	N/A
pivalyloxymethyl butyrate	N/A	N/A	N/A
brequinar	N/A	N/A	N/A
narciclasine	N/A	N/A	N/A
hydrogen sulfide	N/A	N/A	N/A
TAGLN	N/A	N/A	N/A
SLC27A1	N/A	N/A	N/A
B56	N/A	N/A	N/A
apilimod	N/A	N/A	N/A
rosuvastatin	N/A	N/A	N/A
LMX1B	N/A	N/A	N/A
sphingosylphosphocholine	N/A	N/A	N/A
RFX5	N/A	N/A	N/A
NAD+	N/A	N/A	N/A
GPR34	N/A	N/A	N/A
ML290	N/A	N/A	N/A
TMBIM1	N/A	N/A	N/A
ADGRV1	N/A	N/A	N/A
ROCK	N/A	N/A	N/A
LIN7C	N/A	N/A	N/A
green tea polyphenol	N/A	N/A	N/A
auranofin	N/A	N/A	N/A
midazolam	N/A	N/A	N/A
Aldose Reductase	N/A	N/A	N/A
alisertib	N/A	N/A	N/A
isoleucine	N/A	N/A	N/A
(5-(4-N-methyl-N(2-pyridyl)amino)ethoxy)benzyl thiazolidine-2,4-dione	N/A	N/A	N/A
TF	N/A	N/A	N/A
Collagen type V	N/A	N/A	N/A
AC261066	N/A	N/A	N/A
STAP2	N/A	N/A	N/A
TYROBP	N/A	N/A	N/A
RAPGEF3	N/A	N/A	N/A
LOXL1	N/A	N/A	N/A
TWIST	N/A	N/A	N/A
FGB	N/A	N/A	N/A
glycerophosphoric acid	N/A	N/A	N/A
Alpha 1 antitrypsin	N/A	N/A	N/A
PRDX4	N/A	N/A	N/A
D-galactosamine	N/A	N/A	N/A
CXCL5	N/A	N/A	N/A
ribavirin	N/A	N/A	N/A
BCAP31	N/A	N/A	N/A
miR-451a (and other miRNAs w/seed AACCGUU)	N/A	N/A	N/A
bupivacaine	N/A	N/A	N/A
ING2	N/A	N/A	N/A
bromodeoxyuridine	N/A	N/A	N/A
SSBP1	N/A	N/A	N/A
isoprenaline	N/A	N/A	N/A
BTRC	N/A	N/A	N/A
(1S,2R)-NCL-1	N/A	N/A	N/A
ITGB5	N/A	N/A	N/A
MBD1	N/A	N/A	N/A
dextran	N/A	N/A	N/A
1700025L06Rik	N/A	N/A	N/A
C66	N/A	N/A	N/A
CYP2E1	N/A	N/A	N/A
anakinra	N/A	N/A	N/A
CTDNEP1	N/A	N/A	N/A
CHIR 99021	N/A	N/A	N/A
C1q	N/A	N/A	N/A
Eotaxin	N/A	N/A	N/A
1-phenazinecarboxylic acid	N/A	N/A	N/A
vatalanib	N/A	N/A	N/A
HSD17B4	N/A	N/A	N/A
GPC1	N/A	N/A	N/A
sulfur	N/A	N/A	N/A
TNFSF9	N/A	N/A	N/A
thiamine	N/A	N/A	N/A
MFN1	N/A	N/A	N/A
BX-912	N/A	N/A	N/A
PPP1R14B	N/A	N/A	N/A
ammonium chloride	N/A	N/A	N/A
FAAH	N/A	N/A	N/A
miR-196a-5p (and other miRNAs w/seed AGGUAGU)	N/A	N/A	N/A
HEXIM1	N/A	N/A	N/A
RFXAP	N/A	N/A	N/A
choline	N/A	N/A	N/A
FOXF1	N/A	N/A	N/A
MALP-2s	N/A	N/A	N/A
phloretin	N/A	N/A	N/A
KDM6B	N/A	N/A	N/A
PX 478	N/A	N/A	N/A
BCOR	N/A	N/A	N/A
RHOB	N/A	N/A	N/A
oxymatrine	N/A	N/A	N/A
MYBL2	N/A	N/A	N/A
LY6D	N/A	N/A	N/A
baicalin	N/A	N/A	N/A
L-N6-(1-iminoethyl)-lysine	N/A	N/A	N/A
ARHGAP5	N/A	N/A	N/A
CHTOP	N/A	N/A	N/A
SEMA7A	N/A	N/A	N/A
cariporide	N/A	N/A	N/A
oxadiazon	N/A	N/A	N/A
HIF1AN	N/A	N/A	N/A
KAT5	N/A	N/A	N/A
olmesartan	N/A	N/A	N/A
olesoxime	N/A	N/A	N/A
MSRA	N/A	N/A	N/A
beta-1,3-glucan	N/A	N/A	N/A
fomepizole	N/A	N/A	N/A
CHST11	N/A	N/A	N/A
Adaptor protein 1	N/A	N/A	N/A
PAK6	N/A	N/A	N/A
indican	N/A	N/A	N/A
Histone h3	N/A	N/A	N/A
enoxacin	N/A	N/A	N/A
ixazomib	N/A	N/A	N/A
REC2923	N/A	N/A	N/A
miR-205-5p (and other miRNAs w/seed CCUUCAU)	N/A	N/A	N/A
Ly6a (includes others)	N/A	N/A	N/A
Tpi(6)-Leu(13)-psi(CH2NH)-Leu(14)-bombesin (6-14)	N/A	N/A	N/A
PPIA	N/A	N/A	N/A
N-butyryl arginine	N/A	N/A	N/A
TFEC	N/A	N/A	N/A
PTGIS	N/A	N/A	N/A
HOXA3	N/A	N/A	N/A
FRZB	N/A	N/A	N/A
hexamethoxyflavone	N/A	N/A	N/A
ABL2	N/A	N/A	N/A
Fascin	N/A	N/A	N/A
Vegf Receptor	N/A	N/A	N/A
PES1	N/A	N/A	N/A
NOD2	N/A	N/A	N/A
PRKCZ	N/A	N/A	N/A
heme arginate	N/A	N/A	N/A
ZFHX3	N/A	N/A	N/A
IVNS1ABP	N/A	N/A	N/A
ferric chloride	N/A	N/A	N/A
SERTAD2	N/A	N/A	N/A
ochratoxin A	N/A	N/A	N/A
Rp-cAMPS	N/A	N/A	N/A
ADAMTS12	N/A	N/A	N/A
ITGB8	N/A	N/A	N/A
CD1530	N/A	N/A	N/A
telmisartan	N/A	N/A	N/A
IND S1	N/A	N/A	N/A
triclosan	N/A	N/A	N/A
CDH5	N/A	N/A	N/A
SMAD9	N/A	N/A	N/A
CLCN5	N/A	N/A	N/A
miR-27a-3p (and other miRNAs w/seed UCACAGU)	N/A	N/A	N/A
TFCP2	N/A	N/A	N/A
FDXR	N/A	N/A	N/A
ADAMTS5	N/A	N/A	N/A
NDUFA13	N/A	N/A	N/A
LSP1	N/A	N/A	N/A
minodronate	N/A	N/A	N/A
NCAM1	N/A	N/A	N/A
SNORD21	N/A	N/A	N/A
p38 MAP kinase inhibitor	N/A	N/A	N/A
teprotumumab	N/A	N/A	N/A
SYK	N/A	N/A	N/A
(E)-2-(2-quinolin-2-yl-vinyl)-benzene-1,4-diol	N/A	N/A	N/A
LLGL2	N/A	N/A	N/A
CHI3L1	N/A	N/A	N/A
CLEC1B	N/A	N/A	N/A
AXIN2	N/A	N/A	N/A
spermidine	N/A	N/A	N/A
LIMS1	N/A	N/A	N/A
3-aminobenzamide	N/A	N/A	N/A
7-ketocholesterol	N/A	N/A	N/A
LRRFIP2	N/A	N/A	N/A
CETP	N/A	N/A	N/A
DYRK1B	N/A	N/A	N/A
NFAT (complex)	N/A	N/A	N/A
CACNA1A	N/A	N/A	N/A
TBX5	N/A	N/A	N/A
Clock-Bmal1	N/A	N/A	N/A
FSTL1	N/A	N/A	N/A
CARM1	N/A	N/A	N/A
ZNF148	N/A	N/A	N/A
miR-210-3p (miRNAs w/seed UGUGCGU)	N/A	N/A	N/A
APOC1	N/A	N/A	N/A
TCL1A	N/A	N/A	N/A
SB 290157	N/A	N/A	N/A
CTSS	N/A	N/A	N/A
L-type Calcium Channel	N/A	N/A	N/A
suramin	N/A	N/A	N/A
mepazine	N/A	N/A	N/A
ammonium trichloro(dioxoethylene-O,O'-)tellurate	N/A	N/A	N/A
USP6	N/A	N/A	N/A
ZFTA-RELA	N/A	N/A	N/A
pyruvaldehyde	N/A	N/A	N/A
GOLPH3	N/A	N/A	N/A
diethylmaleate	N/A	N/A	N/A
NT157	N/A	N/A	N/A
E. coli 0111:B4 peptidoglycan	N/A	N/A	N/A
ceramide	N/A	N/A	N/A
MAT2B	N/A	N/A	N/A
NFU1	N/A	N/A	N/A
3-O-methylglucose	N/A	N/A	N/A
NLRP12	N/A	N/A	N/A
GNA14	N/A	N/A	N/A
ONECUT1	N/A	N/A	N/A
SIX2	N/A	N/A	N/A
MYF6	N/A	N/A	N/A
GDF15	N/A	N/A	N/A
SLC52A1	N/A	N/A	N/A
MTA1	N/A	N/A	N/A
CHS-828	N/A	N/A	N/A
FBXO42	N/A	N/A	N/A
ethyl-3-trifluoromethylbenzyl-alpha-ketoglutarate	N/A	N/A	N/A
POLG	N/A	N/A	N/A
dinitrophenyl R group	N/A	N/A	N/A
MMP12	N/A	N/A	N/A
SLC40A1	N/A	N/A	N/A
XAV939	N/A	N/A	N/A
POU2F1	N/A	N/A	N/A
NHLRC1	N/A	N/A	N/A
EIF2A	N/A	N/A	N/A
DMP1	N/A	N/A	N/A
guanosine	N/A	N/A	N/A
tetraethylammonium	N/A	N/A	N/A
AFAP1-AS1	N/A	N/A	N/A
HBG1	N/A	N/A	N/A
NVP-TAE684	N/A	0	N/A
NT5E	N/A	N/A	N/A
Fgfr	N/A	N/A	N/A
indoleacetic acid derivative	N/A	N/A	N/A
IPMK	N/A	N/A	N/A
DES	N/A	N/A	N/A
D-galactose	N/A	N/A	N/A
TXN2	N/A	N/A	N/A
MAX	N/A	N/A	N/A
ITCH	N/A	N/A	N/A
hydrocortisone phosphate	N/A	N/A	N/A
MANF	N/A	N/A	N/A
glyburide	N/A	N/A	N/A
MEOX2	N/A	N/A	N/A
CD177	N/A	N/A	N/A
ZNF768	N/A	N/A	N/A
AGTR1	N/A	N/A	N/A
elastase	N/A	N/A	N/A
6-formylindolo[3,2-b]carbazole	N/A	N/A	N/A
Integrinα	N/A	N/A	N/A
FRAX-1036	N/A	N/A	N/A
lead nitrate	N/A	N/A	N/A
mir-452	N/A	N/A	N/A
MSX2	N/A	N/A	N/A
thymoquinone	N/A	N/A	N/A
Am 580	N/A	N/A	N/A
chondroitin sulfate C	N/A	N/A	N/A
chlordecone	N/A	N/A	N/A
TNFRSF11B	N/A	N/A	N/A
PANX1	N/A	N/A	N/A
PTGDR2	N/A	N/A	N/A
azide	N/A	N/A	N/A
PRKCI	N/A	N/A	N/A
RNF11	N/A	N/A	N/A
polyphosphate	N/A	N/A	N/A
SCARB1	N/A	N/A	N/A
CXCL2	N/A	N/A	N/A
TSHZ3	N/A	N/A	N/A
lynestrenol	N/A	N/A	N/A
NKX2-1	N/A	N/A	N/A
N-acetylsphingosine	N/A	N/A	N/A
17beta-estradiol dendrimer conjugate	N/A	N/A	N/A
CSF2RB	N/A	N/A	N/A
CCL15	N/A	N/A	N/A
JUP	N/A	N/A	N/A
mezerein	N/A	N/A	N/A
EPHA2	N/A	N/A	N/A
RANBP10	N/A	N/A	N/A
evodiamine	N/A	N/A	N/A
ICAM1	N/A	N/A	N/A
TEK	N/A	N/A	N/A
cystamine	N/A	N/A	N/A
LIPE	N/A	N/A	N/A
[truncated: 457 more rows]
