# Supplementary material for: Inflammation produced by senescent osteocytes mediates age-related bone loss
Source: Front Immunol. 2023 Feb 6;14:1114006. doi: 10.3389/fimmu.2023.1114006 (PMC9940315; doi:10.3389/fimmu.2023.1114006)
Supplement: Supplementary file 5 [file Table_5.xlsx]

## Sheet: 513 DEPs expression
Gene_ID	Group_A	Group_B	Group_C
PRG4	0.0404776	1.13065	2.00343
CPB2	0.101595	1.43282	2.1312
IGKV2-24	0.25935	0.386809	4.63952
ITGA2B	0.129998	0.891383	1.81548
DEFA3	0.0922452	1.80015	1.1076
FGA	0.125266	1.46067	1.41406
ITGB2	0.118219	1.32698	1.31431
FGG	0.145129	1.39677	1.4581
FGB	0.154892	1.37582	1.46928
ITGB3	0.174531	1.15624	1.6536
FTH1	0.21545	0.804213	1.86272
MPO	0.182848	1.23225	1.51062
IQGAP2	0.21874	0.724499	1.65155
PTPRC	0.177081	1.27266	1.2758
FERMT3	0.240628	1.16521	1.60918
PRTN3	0.147773	1.64283	0.974665
DYSF	0.218949	0.991047	1.44387
ITGAM	0.18364	1.1635	1.13336
FTL	0.317849	0.761803	1.89869
ANK1	0.280541	1.05624	1.66322
SPTA1	0.242396	1.32923	1.42837
SPTB	0.246477	1.31865	1.43487
GRN	0.221039	1.50131	1.27765
GCA	0.261514	1.12547	1.46532
MMP9	0.214058	1.58971	1.12479
EPX	0.195935	1.55594	1.00691
MNDA	0.302907	0.957531	1.54172
EPB42	0.374756	0.759922	1.80848
TGOLN2	0.22628	1.29677	1.09009
LTF	0.251582	1.37037	1.17394
HMOX1	0.347859	0.75721	1.62003
SLC2A1	0.328453	1.15133	1.52022
COX17	0.244984	1.15933	1.11081
CYBA	0.260346	1.25444	1.16391
EPB41	0.308017	1.21683	1.36905
HK3	0.240493	1.29773	1.0324
CTSG	0.291861	1.47051	1.23763
MZB1	0.435615	0.797701	1.79558
MMRN1	0.276277	1.41703	1.05891
SLC4A1	0.413568	1.01487	1.57157
VTN	0.41007	1.04912	1.54082
TBXAS1	0.394155	0.807865	1.44702
TGM2	0.394977	1.1637	1.44132
TFRC	0.329102	1.54563	1.19236
ADD2	0.396411	1.11765	1.43107
NAMPT	0.517152	0.532603	1.85986
C9	0.370701	1.30204	1.32726
CAMP	0.307357	1.23724	1.08535
PLG	0.479238	0.846661	1.6741
ALOX5AP	0.403075	0.979225	1.39645
APOF	0.518483	0.662349	1.75457
ANXA3	0.418131	0.83052	1.40223
PF4	0.2919	1.667	0.976729
C7	0.417904	1.1572	1.38627
ITGA6	0.480633	0.897177	1.57025
DDI2	0.428394	1.00204	1.39808
CTSB	0.503706	0.771461	1.63342
OPTC	0.569289	1.09438	1.79364
CYBB	0.415188	1.1389	1.29905
CD163	0.400986	1.34469	1.25433
SIGLEC16	0.362656	1.16866	1.12893
LTBP1	0.39627	1.31985	1.22899
MYBBP1A	0.443905	1.30118	1.35531
H3C15	0.563901	0.735536	1.72026
CAT	0.527475	0.87127	1.60125
NCEH1	0.46838	0.801508	1.39785
LAMP1	0.483912	1.08632	1.42976
PROS1	0.425599	1.32081	1.25359
GPD2	0.486883	1.11903	1.4335
C4BPB	0.43088	1.33393	1.26555
C4BPA	0.453451	1.2438	1.30275
SERPINA10	0.427657	2.77916	1.22404
G6PD	0.510873	1.04117	1.4517
CNPY3	0.397933	1.05592	1.1161
CANX	0.466093	1.2379	1.29601
MPP1	0.522588	0.988108	1.44275
VASP	0.55338	0.93741	1.50352
S100A9	0.477389	1.18775	1.28735
CARHSP1	0.684172	0	1.84221
GFUS	0.542565	0	1.45743
CORO1A	0.541068	1.01814	1.44079
BST2	0.446305	1.36494	1.18624
PSAP	0.515114	1.12487	1.36001
DNAJB11	0.437971	1.33967	1.15105
CALR	0.48103	1.28258	1.2364
CD63	0.486713	1.31573	1.22626
HSD17B4	0.529699	1.11434	1.3236
ICAM1	0.488708	1.11477	1.21764
HLA-B	0.467917	1.34987	1.16358
PLOD3	0.574084	0.797505	1.42068
FLOT2	0.474758	1.36088	1.16436
RAB8B	0.505072	1.19202	1.23732
AOC3	0.424391	1.54477	1.03084
APOE	0.533566	1.17433	1.2921
SLC3A2	0.485625	1.15219	1.17514
CP	0.552209	1.1204	1.32739
LYZ	0.356386	1.795	0.848611
OSTF1	0.61931	0.828081	1.46665
SCP2	0.435103	1.52839	1.02987
LAMP2	0.572129	1.02788	1.34999
ERO1A	0.555134	1.18799	1.30814
SMARCA5	0.477052	1.0927	1.12242
IGHA1	0.543603	1.18092	1.27548
ACTG1	0.751963	0.989077	1.75503
ATP2A3	0.46773	1.17149	1.08413
NES	0.632043	1.13927	1.45885
ME2	0.494995	1.2642	1.1398
PECAM1	0.580712	1.00674	1.33632
TMEM205	0.531394	1.51599	1.21482
CHCHD3	0.482066	1.47929	1.0962
RTN3	0.60025	1.00761	1.35718
EHD1	0.612072	0.97744	1.37522
SLC16A3	0.597215	0	1.33565
CFHR1	0.382188	1.78093	0.851714
ANXA11	0.590571	1.10591	1.30352
HLA-DPA1	0.555149	1.22276	1.22195
STIM1	0.511064	1.1443	1.12342
TST	0.492825	1.47908	1.07821
MYO1G	0.503866	1.00859	1.10166
ARHGDIB	0.58031	1.11405	1.26749
ERAP1	0.615072	1.07297	1.34316
HLA-DRA	0.5069	1.38699	1.10611
FLOT1	0.589543	1.12436	1.2861
RHOG	0.588905	1.14351	1.28063
APMAP	0.589007	1.13086	1.28014
ACOX1	0.49782	1.44617	1.07841
ADAM10	0.494182	1.4004	1.06093
SPP2	0.41784	1.22999	0.88644
SYNGR2	0.600951	1.01713	1.26563
SOD2	0.592235	1.16476	1.24301
CFP	0.483035	1.45048	1.01345
LBP	0.322851	2.93545	0.677139
ENDOD1	0.70486	0.800346	1.47743
HSD17B11	0.708915	0.784023	1.48306
CLTA	0.579086	1.23444	1.20992
MFAP5	0.381582	1.64027	0.79044
APCS	0.446124	1.63005	0.92383
RAB32	0.674231	0.912208	1.396
NCSTN	0.524994	1.16716	1.06593
TPR	0.534821	1.4319	1.08497
OXSR1	0.697688	0.836018	1.40878
ADD1	0.688781	0.88249	1.38975
PML	0.528187	1.40823	1.06359
HABP2	0.513361	1.51428	1.03208
TINAGL1	0.558287	1.29861	1.11325
ELANE	0.290436	1.90132	0.576198
RPS6KA3	0.732381	0	1.44603
RAC2	0.722221	0.845209	1.4185
AGPS	0.564447	1.19479	1.10752
SYNE3	0.789237	1.1304	1.54207
GPX3	0.647872	1.09166	1.26047
TMED4	0.561506	1.4542	1.08173
HLA-A	0.633828	1.14627	1.2199
HMGB2	0.538375	1.37632	1.03558
M6PR	0.673687	1.08252	1.29293
STAB1	0.591536	1.28818	1.12029
DHRS7	0.613829	1.2841	1.15889
SF3B2	0.615074	1.32796	1.15881
HAGH	0.735556	1.02346	1.3732
RTN1	0.748513	0.954769	1.39563
SLC1A5	0.5691	1.29972	1.06092
CPN1	0.71804	1.06058	1.3373
PSMD7	0.770841	0.676281	1.43337
STT3B	0.588253	1.35424	1.08448
CYP1B1	0.810472	0	1.47382
HSPA5	0.625646	1.24403	1.13033
PRKCB	0.660643	0.99968	1.18882
HSPD1	0.640094	1.21233	1.14757
HSP90B1	0.763989	0.868561	1.36745
HINT2	0.689257	1.4192	1.23355
ITGB1	0.629344	1.24724	1.12341
CISD2	0.600825	1.45724	1.07191
CPT2	0.660655	1.19008	1.17414
ARL6IP1	0.616328	1.83186	1.09119
CPN2	0.699248	1.159	1.23715
CXCL12	0.620147	1.28568	1.09418
SDHB	0.529476	1.61253	0.933449
MYH9	0.679368	1.12817	1.19246
IMPDH2	0.720429	1.02109	1.26039
RAP2B	0.64091	1.20065	1.11854
CBX3	0.669321	1.1229	1.16623
PDIA6	0.758095	0.929595	1.31231
ATP2A2	0.705479	1.07539	1.21913
LCP1	0.695155	1.10803	1.19681
CD93	0.692658	1.03815	1.19228
CPT1A	0.684302	1.08508	1.17599
HEXA	0.667038	1.29394	1.1453
USP14	0.837783	0.785335	1.43771
RAB31	0.848347	0	1.45496
BSG	0.651352	1.24201	1.10664
TIMM9	0.660705	1.3758	1.11934
MYL6	0.695112	1.12742	1.17747
NUDT21	0.674616	1.48588	1.1374
ATAD3A	0.604891	1.29008	1.01938
SUN2	0.574869	1.45711	0.968024
MESD	0.633458	1.27245	1.06586
F9	0.676525	1.17335	1.13647
EIF3C	0.68942	1.15731	1.15364
SKP1	0.687657	1.14784	1.14805
CSK	0.781957	1.32721	1.3052
FCGRT	0.61107	1.46712	1.01693
TMED9	0.690429	1.13718	1.14425
ATP13A1	0.702232	1.15646	1.16276
MAGOH	0.768269	1.19347	1.27
ISOC1	0.803974	1.15378	1.31516
ATP6V0D1	0.601254	1.4395	0.970892
RAB10	0.84062	0.899432	1.35102
CPNE3	0.689023	1.20787	1.1031
PCK2	0.61428	1.48991	0.983098
SEC63	0.597567	1.54731	0.95401
P4HB	0.691473	1.2101	1.09843
CD59	0.639386	1.38019	1.01498
CDK5RAP3	0.795256	0.905186	1.26163
PACSIN2	0.71422	1.12463	1.1294
LONP1	0.707343	1.23807	1.11355
IPO7	0.82983	0.767121	1.29955
UGGT1	0.625361	1.39785	0.978901
CYRIB	0.80938	1.00838	1.26633
STX7	0.725799	1.11003	1.13432
ARL8A	0.736684	1.06445	1.15099
RTN4	0.763356	1.04494	1.1917
PITRM1	0.737178	1.14993	1.15044
TMX3	0.776919	0.937884	1.20802
ANXA7	0.798877	0.962991	1.23813
ABHD10	0.800075	1.36374	1.23604
LNPK	0.814769	1.26524	1.25538
GANAB	0.735951	1.1352	1.12885
RALB	0.728298	1.14225	1.11651
SMC3	0.735326	1.20546	1.12538
PFKM	0.843235	0.628037	1.27709
BCAP31	0.740295	1.14474	1.11767
BLVRA	0.828604	0.926096	1.24792
CCT8	0.830073	0.920136	1.24979
APP	0.698669	1.12954	1.04976
CCT3	0.805404	0.984486	1.21011
GLG1	1.25599	0.907149	0.836857
RPL27A	1.38512	0.420872	0.915382
PSMA5	1.27837	0.762247	0.844691
HNRNPH3	1.1976	0.841889	0.791123
QARS1	1.1641	0.90673	0.768778
EIF3B	1.28237	0.686189	0.846293
H1-0	1.38273	0.706657	0.910608
NDRG1	1.32694	0.488919	0.869883
BUB3	1.13693	0.883687	0.745269
RPL3	1.30496	0.827227	0.852105
H2AC21	1.26597	0.808962	0.823512
PSMA2	1.25622	0.748758	0.814852
RPS23	1.28887	0.668008	0.835627
APOA1	1.35736	0.768545	0.874094
KNG1	1.33256	0.812867	0.854577
HSPG2	1.2629	0.927334	0.809764
ELAVL1	1.20625	0.650717	0.772671
RPSA	1.50672	0.4268	0.962266
WDR1	1.42199	0.527225	0.904485
RAD23B	1.26496	0.918952	0.801348
LDHB	1.50801	0.532903	0.954993
PPIA	1.44031	0.648619	0.911075
YWHAE	1.46199	0.618918	0.919088
SERPINA4	0.634501	4.51357	0.39867
DDT	1.21219	0.768795	0.758782
NIBAN1	1.1814	1.03403	0.73781
CNN2	1.42643	0.64056	0.890368
GPX8	1.11274	0	0.689962
PPA1	1.26149	0.545779	0.781344
TFG	1.22298	0.630842	0.755071
BANF1	1.44655	0.574075	0.892125
RTCB	1.43906	0.67398	0.886957
RPL30	1.32796	0.727323	0.817385
RPL9	1.29808	0.760347	0.795453
UBE2N	1.33743	0.761988	0.819236
RPL28	1.3425	0.694371	0.819097
HSPB1	1.47027	0.635263	0.894468
SEC61A1	1.2951	0.518173	0.784932
NUTF2	1.19274	0.774819	0.721694
RBP4	1.17043	1.08394	0.702705
HNRNPU	1.52704	0.560399	0.912564
ITGAV	1.38664	0.750298	0.824396
RPS4X	1.54763	0.429642	0.919026
GDI2	1.53043	0.561462	0.908105
YWHAQ	1.49621	0.59669	0.886454
GSTM3	1.14453	0.698117	0.678022
FH	1.19576	1.14267	0.70531
ACAT1	1.31713	0.76044	0.773559
GNG12	1.28779	0.884919	0.755345
SEPTIN7	1.4469	0.675117	0.848447
SARS1	1.29105	0.703713	0.753525
TUBA1B	1.54638	0.553049	0.900568
ATP6V1A	1.4551	0.665925	0.845571
ITIH1	1.49014	0.644229	0.865627
CTNND1	1.36654	0.602292	0.790396
ALDOC	1.54881	0.55697	0.894216
HNRNPDL	1.14366	0.584352	0.659685
DCTN2	1.35115	0.764804	0.778376
ARF4	1.44928	0.431937	0.82959
THY1	1.40753	0.45633	0.803941
BTF3L4	1.15249	0.652545	0.65834
UQCRC2	1.41036	0.744754	0.803849
RPS15	1.15886	0.903677	0.659452
NARS1	1.26262	0.836439	0.718298
ENO1	1.47939	0.682851	0.837756
EEF1G	1.50629	0.60573	0.852139
CSRP1	1.2511	0.762434	0.707222
VDAC1	1.50115	0.615715	0.848197
NANS	1.39663	0.384309	0.785929
TF	1.37317	0.854724	0.772103
BPNT2	1.13455	0.744404	0.636687
FUS	1.28523	0.776842	0.720046
RPS2	1.38972	0.498981	0.77727
PKM	1.54521	0.593377	0.861417
RPL38	1.33901	0.643599	0.744057
SERPINC1	1.415	0.801936	0.783059
TAGLN2	1.52597	0.59461	0.842562
FBLN2	1.31105	0.928876	0.721857
EIF3I	1.2014	0.545501	0.66047
CAP1	1.61017	0.505869	0.883958
PGAM1	1.42302	0.753602	0.78108
HNRNPH1	1.50007	0.681455	0.818472
ADH5	1.36544	0.754255	0.744482
RPS11	1.39181	0.480974	0.755039
PTGIS	1.19873	0.921548	0.649619
VWA1	1.41882	0.524006	0.76683
SEC13	1.31034	0.449608	0.706245
HNRNPL	1.46167	0.584008	0.783361
MDH1	1.46391	0.634332	0.782228
IARS1	1.35397	0.483915	0.721385
RPL31	1.23385	0.482973	0.657452
CLIC4	1.32282	0.407353	0.704481
NME2	1.463	0.758351	0.778648
SEPTIN2	1.47068	0.790373	0.78174
EPB41L2	1.4428	0.769847	0.766428
HNRNPA1	1.50127	0.673614	0.795448
SERBP1	1.27421	1.03232	0.673769
NDUFS1	1.44488	0.79135	0.763774
ALDH7A1	1.36557	0.530193	0.721286
SELENBP1	1.59458	0.563293	0.842126
RPL23	1.47715	0.501993	0.779676
CD9	1.44644	0.622945	0.763195
NPEPPS	1.35237	0.686408	0.713008
PSMA6	1.35809	0.802721	0.715769
APOA2	1.41667	0.837241	0.746087
TUBB8	1.27005	0.861527	0.666464
SFXN3	1.26549	0.855738	0.661952
PRDX1	1.45689	0.759514	0.761734
HNRNPA3	1.42985	0.806784	0.745798
HNRNPA2B1	1.60175	0.564236	0.834013
H1-10	1.38198	0.72288	0.717878
TXN	1.47774	0.481775	0.767487
FKBP3	1.35313	0.564743	0.701626
EEF1D	1.4726	0.60133	0.759207
CSTB	1.41536	0.537073	0.728271
HNRNPD	1.66495	0.478597	0.856453
PSMB1	1.37217	0.613066	0.704624
RACK1	1.54731	0.624565	0.793994
RPS3A	1.57041	0.587971	0.804167
ACAA2	1.43849	0.784705	0.732954
AHCY	1.41171	0.600787	0.718583
GSN	1.58029	0.617304	0.802409
ILF2	1.57881	0.582929	0.800349
RPL8	1.47671	0.610357	0.748372
RPS26	1.35759	0.521207	0.687857
RPL24	1.38203	0.50508	0.698047
EZR	1.4583	0.724704	0.735486
COPB1	1.60284	0.552403	0.804062
PLCD1	1.1819	0.791209	0.584539
RPL32	1.23179	0.642923	0.60784
FKBP7	1.1657	0.458323	0.572989
SLC25A13	1.46202	0.680508	0.715418
ILF3	1.60564	0.498414	0.785227
COL5A2	1.32964	0.748294	0.647365
PTBP1	1.41025	0.343203	0.685742
GAPDH	1.59144	0.636755	0.771802
IGHM	1.49694	0.778326	0.724731
EEA1	1.56876	0.417165	0.758169
GARS1	1.3392	0.599075	0.645423
SH3PXD2B	1.10417	0	0.531252
AHSG	1.429	0.884159	0.68684
PDLIM5	1.40984	0.821223	0.674324
CNN3	1.4911	0.340382	0.711112
PGLS	1.25609	1.01704	0.59271
PLIN3	1.61066	0.432223	0.75833
UBE2L3	1.23635	0.747042	0.581221
ALDH1L2	1.4041	0.31721	0.657613
GPI	1.62006	0.583898	0.758209
FABP5	1.6244	0.581999	0.755605
DDAH2	1.37475	0.680296	0.639462
EML4	1.15952	0.814835	0.538544
LDHA	1.70088	0.509998	0.789121
HNRNPA0	1.36374	0.400971	0.632661
PGK1	1.67192	0.556579	0.771505
SEPTIN11	1.571	0.497349	0.723756
VARS1	1.60134	0.47124	0.735142
SND1	1.77278	0.417319	0.809903
CKAP4	1.78066	0.409118	0.810218
SYNCRIP	1.6941	0.535758	0.770146
GLO1	1.58859	0.689512	0.721901
COL1A1	1.46834	0.870642	0.661019
RPL29	1.12362	0	0.505536
CAPN2	1.51756	0.673259	0.678487
ARCN1	1.63227	0.503847	0.723382
TUBB4B	1.63297	0.538002	0.719531
ACTC1	1.5721	0.739045	0.688858
AKR1B1	1.35665	0.790662	0.588113
AKR1A1	1.68608	0.490079	0.72804
TUBB2B	1.8195	0.401272	0.779231
EEF1A1	1.77825	0.463613	0.758136
PYGB	1.75113	0.397273	0.74201
ALDH6A1	1.55875	0.658189	0.658984
LASP1	1.76938	0.411579	0.742109
VCAN	1.72373	0.561905	0.714365
P4HA2	1.35651	0.72576	0.56122
DBI	1.60528	0.42178	0.661281
CTNNA1	1.70658	0.417392	0.69938
USO1	1.63871	0.694028	0.669693
ATP6V1B2	1.47576	0.588221	0.601532
COL6A2	1.50357	0.887746	0.608687
SEC23A	1.56562	0.421468	0.630094
ENPEP	1.59667	0.703935	0.639726
EPRS1	1.62903	0.660823	0.648478
COPB2	1.52399	0.479089	0.605086
SPP1	1.45839	0.966763	0.57485
ALPL	1.80314	0.488207	0.708657
DSTN	1.6574	0.579132	0.648687
RECQL	1.47197	0.672383	0.573848
PGM1	1.65181	0.601724	0.641452
SERPINH1	1.95551	0.287032	0.757461
LGALS1	1.77593	0.539262	0.684806
A2M	1.86269	0.421615	0.715695
DDX1	1.68163	0.485026	0.646082
MAP4	1.22464	0.664116	0.466213
GSTP1	1.81201	0.352388	0.689639
PARK7	1.5066	0.715541	0.57046
AARS1	1.51522	0.249033	0.57318
HNRNPR	1.78872	0.56787	0.675824
CTNNB1	1.53901	0.355779	0.580977
NT5E	1.26861	1.11282	0.477102
FSCN1	1.73842	0.423683	0.648792
FERMT2	1.60558	0.457075	0.591294
OXCT1	1.34229	0.534883	0.493119
TUBA1A	1.55593	0.378295	0.57047
TUBB	1.68423	0.478976	0.612066
TGFBI	1.57614	0.86205	0.561805
HSD17B10	1.80261	0.383071	0.629238
LRRC15	1.3303	0.424067	0.462221
COL6A3	1.6397	0.79115	0.569151
S100A13	1.68083	0.667916	0.583176
AHNAK	1.72864	0.672782	0.598575
CTTN	1.3485	0.739157	0.46264
PHGDH	1.76207	0.511031	0.601793
GPD1	1.55189	0.82662	0.526858
RCN3	1.51729	0.236311	0.514409
SEC31A	1.8339	0.41145	0.612404
COL15A1	1.22746	1.42722	0.398439
FHL1	1.55243	0.727115	0.501483
FKBP9	1.59432	0.372604	0.514209
P3H1	1.44136	0.448667	0.463961
COL14A1	1.99462	0.363897	0.641486
LRRC59	1.58228	0.259354	0.508216
DPYSL2	1.84848	0.558395	0.593125
MYO1D	1.70482	0.282049	0.545441
SEPTIN9	1.70681	0.407415	0.5188
TPI1	1.92693	0.439085	0.582992
COPG1	1.98309	0.376139	0.59266
DPT	1.79973	0.590789	0.535083
RRBP1	2.01262	0.213326	0.594128
CTHRC1	1.44825	0.484107	0.426564
COL6A1	1.67762	0.830731	0.491644
KCTD12	2.02231	0.397788	0.579898
PEBP1	1.60529	0.42491	0.459604
TMEM119	1.94227	0.373472	0.54448
LUM	1.64818	0.90508	0.446738
NCAM1	1.53083	0.758679	0.407164
COL5A1	1.7646	0.615198	0.466783
ACO1	1.45757	0.564032	0.379105
AEBP1	1.81489	0.399307	0.471225
P4HA1	1.75476	0.220255	0.44954
COPA	2.09189	0.310803	0.534653
OLFML3	1.64078	0.416635	0.417951
FLNB	2.28456	0.179178	0.536262
IDH1	1.88993	0.645494	0.432347
HDLBP	1.88545	0.502451	0.424048
PLS3	2.12847	0.238822	0.466515
MYO6	1.65752	0.336905	0.346947
MYO1B	2.00503	0.204447	0.413636
ADIRF	1.31882	0.64886	0.267606
DCN	1.78328	0.857251	0.359468
DPYSL3	1.77098	0.346779	0.348364
FKBP10	1.737	0.302306	0.331786
ABI3BP	0.97202	2.10196	0.17999
PCOLCE	1.80832	0.613389	0.312752
CD109	1.62588	0.632181	0.279202
TNC	2.05819	0.597272	0.344535
CLEC11A	1.31754	0.81808	0.217723
OGN	1.88166	0.815158	0.303187
MFGE8	1.59955	1.19295	0.242582
COL12A1	2.39986	0.23617	0.363967
MRC2	2.34013	0.193486	0.332373
BGN	2.02483	0.698073	0.277093
COCH	1.78436	0.836356	0.241352
MATN2	1.39079	0.642069	0.185575
SPARC	2.33426	0.313126	0.290174
ENPP1	1.68226	0.418848	0.19642
SERPINF1	2.32752	0.401004	0.271478
ASPN	1.7537	0.560862	0.192019
PRELP	1.74743	1.06213	0.190444
CHAD	2.14838	0.605211	0.171048
CSPG4	1.87862	0.539543	0.139498
OMD	2.41482	0.115383	0.15539
COL2A1	2.22908	0.479865	0.0966961
COMP	1.87069	0.723542	0.0446995
ACAN	2.16889	0.579464	0.0386133
FMOD	1.91565	0.678439	0.0223404
TNXB	0.935103	2.04865	0.0097559
MYH7	1.67603	0.512692	0.009445

## Sheet: Cluster
cluster1	cluster2	cluster3	cluster4	cluster5	cluster6
HNRNPH3	CPB2	PRG4	GLG1	DEFA3	RPL27A
RPL3	FGA	IGKV2-24	QARS1	PRTN3	PSMA5
H2AC21	ITGB2	ITGA2B	BUB3	GRN	EIF3B
PSMA2	FGG	FTH1	HSPG2	MMP9	H1-0
KNG1	FGB	IQGAP2	RAD23B	EPX	NDRG1
DDT	ITGB3	FTL	NIBAN1	TGOLN2	RPS23
RPL9	MPO	ANK1	RBP4	LTF	APOA1
UBE2N	PTPRC	MNDA	FH	HK3	ELAVL1
NUTF2	FERMT3	EPB42	GNG12	CTSG	RPSA
ITGAV	DYSF	HMOX1	RPS15	MMRN1	WDR1
GSTM3	ITGAM	MZB1	NARS1	TFRC	LDHB
ACAT1	SPTA1	SLC4A1	TF	PF4	PPIA
SARS1	SPTB	VTN	BPNT2	SERPINA10	YWHAE
HNRNPDL	GCA	TBXAS1	FBLN2	BST2	CNN2
DCTN2	SLC2A1	NAMPT	PTGIS	DNAJB11	GPX8
BTF3L4	COX17	PLG	SERBP1	HLA-B	PPA1
UQCRC2	CYBA	ALOX5AP	TUBB8	FLOT2	TFG
CSRP1	EPB41	APOF	SFXN3	AOC3	BANF1
FUS	TGM2	ANXA3	PLCD1	LYZ	RTCB
RPL38	ADD2	ITGA6	COL5A2	SCP2	RPL30
SERPINC1	C9	DDI2	AHSG	TMEM205	RPL28
PGAM1	CAMP	CTSB	PDLIM5	CHCHD3	HSPB1
ADH5	C7	OPTC	PGLS	CFHR1	SEC61A1
NME2	CYBB	H3C15	UBE2L3	TST	HNRNPU
SEPTIN2	CD163	CAT	EML4	HLA-DRA	RPS4X
EPB41L2	SIGLEC16	NCEH1	COL1A1	ACOX1	GDI2
NDUFS1	LTBP1	G6PD	AKR1B1	ADAM10	YWHAQ
NPEPPS	MYBBP1A	MPP1	P4HA2	SPP2	SEPTIN7
PSMA6	LAMP1	VASP	COL6A2	CFP	TUBA1B
APOA2	PROS1	CARHSP1	SPP1	LBP	ATP6V1A
PRDX1	GPD2	GFUS	MAP4	MFAP5	ITIH1
HNRNPA3	C4BPB	CORO1A	PARK7	APCS	CTNND1
H1-10	C4BPA	PLOD3	NT5E	TPR	ALDOC
PSMB1	CNPY3	OSTF1	TGFBI	PML	ARF4
ACAA2	CANX	LAMP2	COL6A3	HABP2	THY1
AHCY	S100A9	ACTG1	CTTN	TINAGL1	ENO1
EZR	PSAP	NES	GPD1	ELANE	EEF1G
RPL32	CALR	PECAM1	COL15A1	TMED4	VDAC1
SLC25A13	CD63	RTN3	FHL1	HMGB2	NANS
GAPDH	HSD17B4	EHD1	COL6A1	STAB1	RPS2
IGHM	ICAM1	SLC16A3	LUM	DHRS7	PKM
GARS1	RAB8B	SYNGR2	NCAM1	SF3B2	TAGLN2
DDAH2	APOE	ENDOD1	ACO1	SLC1A5	EIF3I
GLO1	SLC3A2	HSD17B11	IDH1	STT3B	CAP1
CAPN2	CP	RAB32	ADIRF	HSPA5	HNRNPH1
ACTC1	ERO1A	OXSR1	DCN	HINT2	RPS11
ALDH6A1	SMARCA5	ADD1	PCOLCE	ITGB1	VWA1
VCAN	IGHA1	RPS6KA3	CD109	CISD2	SEC13
USO1	ATP2A3	RAC2	TNC	ARL6IP1	HNRNPL
ATP6V1B2	ME2	SYNE3	CLEC11A	CXCL12	MDH1
ENPEP	ANXA11	HAGH	OGN	SDHB	IARS1
EPRS1	HLA-DPA1	RTN1	MFGE8	HEXA	RPL31
COPB2	STIM1	CPN1	BGN	BSG	CLIC4
DSTN	MYO1G	PSMD7	COCH	TIMM9	HNRNPA1
RECQL	ARHGDIB	CYP1B1	MATN2	NUDT21	ALDH7A1
PGM1	ERAP1	HSP90B1	ENPP1	ATAD3A	SELENBP1
LGALS1	FLOT1	IMPDH2	ASPN	SUN2	RPL23
DDX1	RHOG	PDIA6	PRELP	MESD	CD9
HNRNPR	APMAP	USP14	CHAD	FCGRT	HNRNPA2B1
FERMT2	SOD2	RAB31	CSPG4	ATP6V0D1	TXN
OXCT1	CLTA	RAB10	COL2A1	CPNE3	FKBP3
TUBB	NCSTN	CDK5RAP3	COMP	PCK2	EEF1D
LRRC15	AGPS	IPO7	ACAN	SEC63	CSTB
S100A13	GPX3	CYRIB	FMOD	P4HB	HNRNPD
AHNAK	HLA-A	TMX3	MYH7	CD59	RACK1
PHGDH	M6PR	ANXA7		LONP1	RPS3A
SEC31A	PRKCB	PFKM		UGGT1	GSN
FKBP9	HSPD1	BLVRA		ABHD10	ILF2
P3H1	CPT2	CCT8		APP	RPL8
DPYSL2	CPN2	CCT3		SERPINA4	RPS26
SEPTIN9	MYH9			ABI3BP	RPL24
TPI1	RAP2B			TNXB	COPB1
COPG1	CBX3				FKBP7
DPT	ATP2A2				ILF3
CTHRC1	LCP1				PTBP1
KCTD12	CD93				EEA1
PEBP1	CPT1A				SH3PXD2B
TMEM119	MYL6				CNN3
COL5A1	F9				PLIN3
AEBP1	EIF3C				ALDH1L2
COPA	SKP1				GPI
OLFML3	CSK				FABP5
HDLBP	TMED9				LDHA
PLS3	ATP13A1				HNRNPA0
MYO6	MAGOH				PGK1
MYO1B	ISOC1				SEPTIN11
DPYSL3	PACSIN2				VARS1
FKBP10	STX7				SND1
COL12A1	ARL8A				CKAP4
MRC2	RTN4				SYNCRIP
SPARC	PITRM1				RPL29
SERPINF1	LNPK				ARCN1
OMD	GANAB				TUBB4B
	RALB				AKR1A1
	SMC3				TUBB2B
	BCAP31				EEF1A1
					PYGB
					LASP1
					DBI
					CTNNA1
					SEC23A
					ALPL
					SERPINH1
					A2M
					GSTP1
					AARS1
					CTNNB1
					FSCN1
					TUBA1A
					HSD17B10
					RCN3
					COL14A1
					LRRC59
					MYO1D
					RRBP1
					P4HA1
					FLNB
